# Supplementary material for: An exploration of vascular cell development in mouse embryoid bodies under hypoxia through single cell RNA-seq
Source: Research Square preprint supplement (doi:10.21203/rs.3.rs-3954034/v1), 2024-02-26
Supplement: Supplementary file 6 [file ea3d579f2a832da3ced5a5e5.xlsx]

## Sheet: 1-Cell Metadata
	orig.ident	treatment	time	nCount_RNA	nFeature_RNA	percent.mt	percent.ribo	percent.chrY	S.Score_integrated	G2M.Score_integrated	Phase_integrated	res_0.2_Clustering	res_0.2_Uncertainty	Hx_consensusPrediction	UMAP_1	UMAP_2
AAACCCACACCCAACG-1_1	NX1	Nx	08d	44672	6828	2.847	23.039	0.018	0.896783	1.62981	G2M	5	0.0236857	0.0404786	-8.74823	-4.21852
AAACCCACACTCGATA-1_1	NX1	Nx	08d	23201	5178	3.569	20.245	0.013	0.0919288	-0.654107	S	2	0.0971621	0.931585	-1.70413	-0.584724
AAACCCACAGTCTCTC-1_1	NX1	Nx	08d	70179	7841	3.646	22.591	0.024	0.724064	1.34084	G2M	0	0.0544205	0.0404786	1.05395	1.42405
AAACCCACAGTGAGCA-1_1	NX1	Nx	08d	35680	5504	2.326	24.075	0.025	1.34197	0.745592	S	6	0	0.135375	0.443124	-13.4725
AAACCCATCGTCGATA-1_1	NX1	Nx	08d	65108	7736	4.632	20.69	0.029	0.822269	0.857464	G2M	4	0.0455568	0.0404786	-1.15299	1.42369
AAACGAAGTGGTTCTA-1_1	NX1	Nx	08d	24185	5041	4.734	25.45	0.008	1.01394	1.32912	G2M	3	0.0239706	0.0404786	-3.61522	2.28956
AAACGCTGTAGCTAAA-1_1	NX1	Nx	08d	11418	2861	0.841	27.054	0.009	-0.0779073	0.270575	G2M	1	0.0320019	0.0404786	5.06351	4.1323
AAAGAACCAGCTACTA-1_1	NX1	Nx	08d	33040	6002	5.672	19.083	0.045	1.17262	0.0558157	S	3	0.0239706	0.0404786	-2.93446	3.74166
AAAGAACGTGCTCTCT-1_1	NX1	Nx	08d	8689	2932	9.161	19.438	0.012	-0.186932	-0.563619	G1	2	0.0971621	0.0404786	-1.23683	-2.02486
AAAGGATCACCCATAA-1_1	NX1	Nx	08d	16797	3772	4.501	27.297	0.006	0.401161	0.485315	G2M	0	0.0544205	0.135375	-1.62171	2.96374
AAAGGATGTGAGACGT-1_1	NX1	Nx	08d	20599	5170	6.486	20.448	0.029	0.649152	0.924084	G2M	3	0.0239706	0.0404786	-4.79392	2.07776
AAAGGATGTGTGGTCC-1_1	NX1	Nx	08d	27750	5395	5.485	22.032	0.018	0.686327	1.16368	G2M	2	0.0971621	0.0404786	-0.625035	-2.33498
AAAGGGCAGTCACTGT-1_1	NX1	Nx	08d	24555	4672	4.858	19.507	0.016	0.069077	-0.543993	S	1	0.0320019	0.0404786	3.13872	4.93903
AAAGGGCCAATCCTTT-1_1	NX1	Nx	08d	14388	3718	3.565	23.742	0.028	-0.430032	-0.633262	G1	0	0.0544205	0.219316	1.43608	-0.246797
AAAGGGCGTTACTCAG-1_1	NX1	Nx	08d	16220	3767	6.517	28.36	0.031	0.0236266	-0.654354	S	0	0.0544205	0.177399	0.658604	1.17478
AAAGGTACAGAGTAAT-1_1	NX1	Nx	08d	21540	4538	5.116	23.245	0.014	0.675705	-0.125626	S	4	0.0455568	0.0404786	-2.25934	1.37832
AAAGGTACATACCAGT-1_1	NX1	Nx	08d	14021	3928	4.087	24.57	0.014	0.699925	-0.335895	S	3	0.0239706	0.180829	-4.39019	1.54692
AAAGGTAGTACAGTCT-1_1	NX1	Nx	08d	22164	4713	4.737	23.349	0.036	0.00871212	0.11495	G2M	0	0.0544205	0.0404786	4.91927	-0.568928
AAAGGTAGTCCACGCA-1_1	NX1	Nx	08d	19497	4610	5.129	22.434	0.01	0.824919	-0.418162	S	0	0.0544205	0.0404786	3.70237	-0.575579
AAAGGTATCCGCCTAT-1_1	NX1	Nx	08d	15104	4214	5.575	21.743	0.02	-0.0152115	-0.570983	G1	2	0.0971621	0.0404786	-3.37143	-2.39447
AAAGTCCCAAACCACT-1_1	NX1	Nx	08d	26478	5137	7.572	23.114	0.049	-0.0982412	-0.725228	G1	2	0.0971621	0.0404786	-2.40066	-0.749618
AAAGTCCCATAAGCGG-1_1	NX1	Nx	08d	22457	4954	2.565	23.743	0.04	1.31687	0.00894819	S	0	0.0544205	0.443753	1.73376	0.0268894
AAAGTCCGTACGCTTA-1_1	NX1	Nx	08d	12917	3761	6.371	22.056	0.015	-0.415055	-0.573859	G1	2	0.0971621	0.0404786	-2.04848	-2.18778
AAAGTGAAGTAACAGT-1_1	NX1	Nx	08d	36394	5745	1.66	20.852	0.011	0.727946	0.868338	G2M	1	0.0320019	0.0404786	6.40798	5.21966
AAAGTGATCCCATACC-1_1	NX1	Nx	08d	16693	3926	4.319	26.466	0.012	0.700339	0.195867	S	3	0.0239706	0.0551106	-2.3036	3.9426
AAAGTGATCTCCTACG-1_1	NX1	Nx	08d	26990	5083	3.831	30.196	0.03	0.370881	-0.246469	S	5	0.0236857	0.177399	-12.1341	-4.37182
AAATGGACAGGAAGTC-1_1	NX1	Nx	08d	21280	4216	5.367	31.654	0.009	0.453202	-0.176195	S	5	0.0236857	0.0404786	-10.3624	-4.14373
AAATGGAGTATCTCTT-1_1	NX1	Nx	08d	25877	5316	4.154	21.119	0.019	1.31779	-0.438095	S	4	0.0455568	0.0404786	0.365337	1.55261
AAATGGATCGATAACC-1_1	NX1	Nx	08d	23750	5130	4.653	23.638	0.008	1.13467	0.875518	S	0	0.0544205	0.0404786	3.71236	-1.24261
AACAAAGCAAAGGGCT-1_1	NX1	Nx	08d	27356	5379	5.224	24.773	0.015	-0.293117	-0.733514	G1	5	0.0236857	0.177399	-9.91616	-4.32173
AACAAAGCACGTCTCT-1_1	NX1	Nx	08d	29490	4645	3.211	21.621	0.01	-0.115168	-0.488381	G1	1	0.0320019	0.0404786	4.60841	5.08296
AACAAAGGTACGAGCA-1_1	NX1	Nx	08d	16861	3958	4.472	26.867	0.018	0.754276	0.327061	S	0	0.0544205	0.0404786	-1.31145	3.2212
AACAAAGTCTACTTCA-1_1	NX1	Nx	08d	31386	5743	4.617	18.871	0.025	0.638589	0.730008	G2M	0	0.0544205	0.135375	1.25187	0.45282
AACAACCAGCGTCGAA-1_1	NX1	Nx	08d	11803	3392	4.041	24.638	0.008	-0.369401	0.0175002	G2M	0	0.0544205	0.218419	2.80365	1.28752
AACAACCAGGAACGTC-1_1	NX1	Nx	08d	23989	4961	4.44	23.44	0.017	0.299955	1.7715	G2M	2	0.0971621	0.0646147	-4.42457	-1.31006
AACAACCAGGTCTACT-1_1	NX1	Nx	08d	21922	5091	4.11	20.413	0.027	0.100829	-0.531483	S	0	0.0544205	0.374009	0.506096	-1.53836
AACAACCAGTAGGGTC-1_1	NX1	Nx	08d	25408	5252	5.589	23.78	0.016	0.228761	1.25311	G2M	0	0.0544205	0.0404786	-2.08499	2.51806
AACAACCCACCGTCTT-1_1	NX1	Nx	08d	27916	5869	4.245	20.178	0.039	0.316535	-0.680511	S	3	0.0239706	0.0404786	-4.14413	3.25505
AACAAGACACGGAAGT-1_1	NX1	Nx	08d	11871	3198	5.315	25.027	0	-0.193655	-0.58341	G1	1	0.0320019	0.0404786	3.34746	0.785647
AACAAGACACGTACTA-1_1	NX1	Nx	08d	50582	7172	5.887	19.11	0.024	0.084433	0.0424641	S	3	0.0239706	0.0404786	-1.13534	5.19435
AACAAGACATAACAGA-1_1	NX1	Nx	08d	9420	2971	2.548	26.03	0.021	-0.0217703	-0.318825	G1	2	0.0971621	0.0404786	-4.86645	-1.94225
AACAAGAGTCTTCTAT-1_1	NX1	Nx	08d	29518	5464	5.983	19.314	0.02	0.121337	0.125957	G2M	1	0.0320019	0.0404786	4.51215	2.86345
AACAAGATCGAGTCCG-1_1	NX1	Nx	08d	13309	3564	5.477	26.268	0.015	-0.227447	-0.511394	G1	2	0.0971621	0.233633	-0.57578	-2.86441
AACACACCATGGTACT-1_1	NX1	Nx	08d	17851	4612	5.036	18.397	0.011	0.233434	0.310342	G2M	0	0.0544205	0.0646147	3.34073	-1.40334
AACACACTCTCTATGT-1_1	NX1	Nx	08d	48175	7183	4.65	16.056	0.008	0.28607	1.31703	G2M	4	0.0455568	0.0646147	-0.903256	1.57424
AACAGGGCATCTCAAG-1_1	NX1	Nx	08d	18175	4548	4.941	20.27	0.011	0.0207524	-0.645583	S	0	0.0544205	0.0404786	2.77982	-0.198251
AACAGGGGTCAGCTTA-1_1	NX1	Nx	08d	11842	3744	3.851	18.113	0.017	-0.369701	1.86271	G2M	0	0.0544205	0.303249	-0.198148	0.706376
AACAGGGGTTCGGTTA-1_1	NX1	Nx	08d	12272	3604	7.383	21.618	0.016	-0.149004	-0.525977	G1	4	0.0455568	0.0404786	-1.37346	1.57274
AACAGGGGTTTGATCG-1_1	NX1	Nx	08d	31636	5461	7.381	21.804	0.035	0.310051	-0.645251	S	1	0.0320019	0.893901	3.45024	5.26302
AACAGGGTCTTCGGTC-1_1	NX1	Nx	08d	12716	3514	5.175	25.543	0.024	-0.110845	0.0971178	G2M	0	0.0544205	0.0404786	-2.22167	2.80753
AACCAACAGAGGTATT-1_1	NX1	Nx	08d	44803	6852	3.361	19.38	0.018	0.321219	1.25077	G2M	5	0.0236857	0.0404786	-11.0131	-3.99466
AACCAACAGCGTGAAC-1_1	NX1	Nx	08d	20841	4890	5.206	21.055	0.014	1.38438	0.0558122	S	4	0.0455568	0.0404786	-0.766232	1.69526
AACCAACCAGATGCGA-1_1	NX1	Nx	08d	15566	4159	4.857	21.701	0.058	0.149842	0.512578	G2M	0	0.0544205	0.0404786	4.32962	-2.16935
AACCAACGTCACCGAC-1_1	NX1	Nx	08d	49884	7116	4.244	20.419	0.022	0.0682039	1.93378	G2M	4	0.0455568	0.0404786	0.509785	1.22761
AACCAACTCCACGTAA-1_1	NX1	Nx	08d	27602	5408	4.224	20.075	0.043	0.847974	0.979311	G2M	4	0.0455568	0.0404786	-0.789098	1.68381
AACCACAGTCAGGCAA-1_1	NX1	Nx	08d	27640	5778	5.402	19.316	0.018	1.59347	0.23206	S	3	0.0239706	0.0404786	-4.82383	3.07568
AACCATGCAACTAGAA-1_1	NX1	Nx	08d	24153	5141	4.716	21.07	0.033	0.380856	0.506439	G2M	0	0.0544205	0.0404786	1.64811	0.424169
AACCATGGTCCACTCT-1_1	NX1	Nx	08d	41179	6604	3.973	19.257	0.049	0.477484	1.4761	G2M	5	0.0236857	0.0404786	-11.6905	-4.32788
AACCATGTCCTTGAAG-1_1	NX1	Nx	08d	42183	6155	4.101	24.737	0.014	0.974841	0.864226	S	5	0.0236857	0.0404786	-9.93162	-4.23657
AACCCAAAGTTACGAA-1_1	NX1	Nx	08d	22244	4870	4.693	26.385	0.031	0.269323	-0.608575	S	5	0.0236857	0.135375	-11.3986	-4.61771
AACCCAACAAGGCAAC-1_1	NX1	Nx	08d	47914	6828	3.93	17.611	0.029	0.342847	1.14875	G2M	1	0.0320019	0.0404786	6.03472	2.89417
AACCCAACACCAGCTG-1_1	NX1	Nx	08d	27061	5128	4.102	23.089	0.018	0.435736	-0.116029	S	0	0.0544205	0.0404786	4.15953	0.337578
AACCCAACAGGTCAAG-1_1	NX1	Nx	08d	34837	6084	4.851	23.105	0.023	-0.263824	-0.589367	G1	1	0.0320019	0.0404786	2.72692	5.09394
AACCCAATCGACCATA-1_1	NX1	Nx	08d	12652	3719	3.58	20.811	0.008	-0.156854	-0.402412	G1	4	0.0455568	0.0646147	0.251294	1.2133
AACCTGATCATTACTC-1_1	NX1	Nx	08d	17422	3752	5.981	34.118	0	1.2593	-0.123317	S	9	0	0.0404786	-7.37021	-9.70396
AACCTGATCATTTGCT-1_1	NX1	Nx	08d	16301	4136	6.024	22.588	0.037	-0.32563	-0.361325	G1	0	0.0544205	0.0404786	-1.49754	1.70251
AACCTTTAGGTAAACT-1_1	NX1	Nx	08d	25935	5696	2.992	19.152	0.031	0.644354	-0.451678	S	0	0.0544205	0.0404786	2.00907	-0.887501
AACCTTTCACACCAGC-1_1	NX1	Nx	08d	10710	3355	3.156	21.475	0.037	-0.36155	-0.43503	G1	4	0.0455568	0.344825	-0.073605	1.67318
AACCTTTCAGGGTCTC-1_1	NX1	Nx	08d	21285	4264	4.98	24.736	0.005	-0.184557	-0.532914	G1	1	0.0320019	0.0404786	6.6762	4.90293
AACCTTTGTGGATTTC-1_1	NX1	Nx	08d	35027	5852	4.225	18.651	0.026	0.223212	1.43664	G2M	3	0.0239706	0.110069	-0.946447	5.36709
AACCTTTTCGGCTGGT-1_1	NX1	Nx	08d	10628	3540	5.504	17.407	0.047	0.29214	-0.319449	S	0	0.0544205	0.0404786	3.04412	-1.67214
AACGAAACAACGTTAC-1_1	NX1	Nx	08d	36194	6128	4.727	24.7	0.028	0.401916	-0.569939	S	0	0.0544205	0.177399	0.749529	0.668182
AACGAAATCCTCAGGG-1_1	NX1	Nx	08d	32825	5129	3.053	31.33	0.003	1.03926	-0.124799	S	6	0	0.181218	-0.272564	-13.484
AACGGGAAGCGTCAGA-1_1	NX1	Nx	08d	24766	5350	5.56	26.06	0.04	-0.271444	-0.566325	G1	5	0.0236857	0.328529	-12.2142	-4.495
AACGGGAAGCTCCACG-1_1	NX1	Nx	08d	20493	4948	4.431	17.874	0.015	0.776363	0.449232	S	4	0.0455568	0.443753	-0.368518	1.6353
AACGGGAAGGATAATC-1_1	NX1	Nx	08d	17631	4133	5.575	28.841	0.011	-0.00631903	-0.82661	G1	0	0.0544205	0.0404786	2.82455	-0.187469
AACGGGAGTTCGGCGT-1_1	NX1	Nx	08d	41835	6460	7.656	22.598	0.026	0.838024	0.216944	S	4	0.0455568	0.0404786	-0.051109	2.382
AACTTCTCAGAGGAAA-1_1	NX1	Nx	08d	14552	4055	4.845	20.691	0.007	0.214466	-0.633645	S	4	0.0455568	0.0646147	-0.166839	1.97398
AACTTCTGTAGGGAGG-1_1	NX1	Nx	08d	10348	3214	6.62	22.4	0.039	-0.401114	-0.708379	G1	2	0.0971621	0.205118	-1.07469	-2.87765
AACTTCTTCCCATTCG-1_1	NX1	Nx	08d	31883	4450	3.083	32.07	0.016	1.08951	0.195879	S	7	0.0277228	0.181218	-7.87707	-6.6925
AAGAACAAGCAGGCAT-1_1	NX1	Nx	08d	22446	4891	5.662	24.272	0.031	0.972875	1.09056	G2M	4	0.0455568	0.0404786	-1.58234	1.09944
AAGAACATCTTCCCGA-1_1	NX1	Nx	08d	13951	2445	0.33	32.148	0	0.107708	0.623386	G2M	7	0.0277228	0.233633	-7.86755	-6.70869
AAGACAACAACAACAA-1_1	NX1	Nx	08d	20647	4480	4.369	27.592	0.005	0.349508	-0.464403	S	0	0.0544205	0.0404786	3.83111	-1.32161
AAGACAACATTGACAC-1_1	NX1	Nx	08d	25780	5065	3.922	27.106	0.023	-0.183865	-0.616148	G1	5	0.0236857	0.0404786	-12.4362	-4.82192
AAGACAATCTCGCTCA-1_1	NX1	Nx	08d	30149	5819	3.201	20.422	0.023	0.435844	1.03527	G2M	5	0.0236857	0.0404786	-11.95	-4.74404
AAGACTCCAAGAGTAT-1_1	NX1	Nx	08d	12958	3661	4.175	25.282	0.054	-0.462437	-0.504098	G1	3	0.0239706	0.0404786	-4.10685	2.79182
AAGATAGTCAGACATC-1_1	NX1	Nx	08d	14778	4025	3.41	24.388	0.02	0.116901	-0.631437	S	0	0.0544205	0.0404786	-0.176334	-1.73493
AAGCATCAGAGCAACC-1_1	NX1	Nx	08d	19001	4413	6.552	21.825	0.026	0.339411	0.645048	G2M	3	0.0239706	0.205118	-2.32724	3.2309
AAGCATCAGGGAACAA-1_1	NX1	Nx	08d	19051	4655	5.05	25.022	0.016	-0.113064	2.07432	G2M	3	0.0239706	0.0404786	-4.31981	1.87143
AAGCATCCACGCAGTC-1_1	NX1	Nx	08d	62485	6778	3.161	25.254	0.016	0.758877	1.39315	G2M	6	0	0.177399	-0.902186	-13.2647
AAGCATCTCAAGGAGC-1_1	NX1	Nx	08d	12339	3532	4.66	21.955	0.032	-0.409239	-0.609504	G1	2	0.0971621	0.0404786	-0.47334	-4.16851
AAGCCATCAAACAGGC-1_1	NX1	Nx	08d	13961	3394	6.482	26.409	0.029	-0.0307201	-0.588742	G1	3	0.0239706	0.233633	-3.06749	4.18847
AAGCCATCAGCGTAGA-1_1	NX1	Nx	08d	9356	3259	6.135	19.089	0.011	-0.237905	-0.510057	G1	0	0.4411	0.0404786	2.25214	-2.66947
AAGCCATGTCGCTCGA-1_1	NX1	Nx	08d	19830	4450	5.219	25.698	0.04	0.455358	-0.340689	S	0	0.0544205	0.0404786	2.72157	0.676796
AAGCGAGAGACTCTAC-1_1	NX1	Nx	08d	15232	3849	6.04	19.518	0.046	-0.0456299	-0.35114	G1	1	0.0320019	0.0404786	2.70992	5.30805
AAGCGAGGTACCGGCT-1_1	NX1	Nx	08d	19271	4728	4.748	20.419	0.031	0.652807	0.683779	G2M	4	0.0455568	0.0404786	0.0804616	2.86119
AAGCGAGGTCCTGTTC-1_1	NX1	Nx	08d	22044	4837	4.917	21.04	0.036	0.0952397	-0.703454	S	0	0.0544205	0.443753	1.58157	0.0990594
AAGCGAGGTTGCCGAC-1_1	NX1	Nx	08d	37598	6239	5.551	23.701	0.016	0.00411293	-0.0766379	S	4	0.0455568	0.0404786	-0.2743	2.10827
AAGCGAGTCGTTGCCT-1_1	NX1	Nx	08d	19325	4324	4.906	23.234	0.005	0.51328	0.0158285	S	4	0.0455568	0.0404786	1.70884	1.99019
AAGCGAGTCTCCCTAG-1_1	NX1	Nx	08d	9706	2739	5.801	32.743	0.021	-0.240421	-0.141612	G1	3	0.0239706	0.135375	-3.97482	2.8213
AAGCGTTAGGGTGAAA-1_1	NX1	Nx	08d	29291	5216	5.971	21.597	0.017	1.0476	0.0583391	S	1	0.0320019	0.0404786	4.6217	4.35555
AAGCGTTCATCGGATT-1_1	NX1	Nx	08d	28252	5644	3.603	23.492	0.025	0.14416	-0.662625	S	2	0.0971621	0.0404786	-3.27844	1.11762
AAGGAATTCCATCTGC-1_1	NX1	Nx	08d	16616	3949	5.573	23.79	0.03	0.187644	-0.266064	S	0	0.0544205	0.0404786	-0.985819	3.13359
AAGGTAAGTATCTCTT-1_1	NX1	Nx	08d	19921	4938	5.441	18.659	0.03	0.0987239	-0.255096	S	3	0.0239706	0.0404786	-3.27062	3.55097
AAGTACCAGAGCAAGA-1_1	NX1	Nx	08d	22826	4734	4.074	22.676	0.018	0.425694	-0.078152	S	1	0.0320019	0.0646147	1.69234	-2.83084
AAGTACCCACACGTGC-1_1	NX1	Nx	08d	64218	7726	5.399	21.301	0.028	0.149346	1.11261	G2M	4	0.0455568	0.0404786	-1.37788	1.64178
AAGTACCTCGCAATTG-1_1	NX1	Nx	08d	28079	5531	4.509	20.884	0.004	0.244173	0.558059	G2M	0	0.0544205	0.0404786	4.50205	-0.953895
AAGTCGTAGTTGAAGT-1_1	NX1	Nx	08d	16001	3853	4.9	24.248	0.006	1.05981	-0.387229	S	1	0.0320019	0.0404786	4.12062	3.98244
AAGTCGTCAACATACC-1_1	NX1	Nx	08d	25945	5144	4.976	23.931	0.015	0.912941	0.901912	S	4	0.0455568	0.0404786	-1.69922	1.47023
AAGTCGTCACATAGCT-1_1	NX1	Nx	08d	18824	4804	2.964	22.413	0.032	1.1675	0.0288158	S	0	0.0544205	0.443753	1.83832	0.736158
AAGTCGTGTTACGTAC-1_1	NX1	Nx	08d	11722	3280	5.102	30.191	0	-0.167794	-0.442994	G1	3	0.0239706	0.177399	-3.57833	3.2003
AAGTCGTTCACTACGA-1_1	NX1	Nx	08d	7889	2578	1.432	26.962	0.013	1.07448	0.544225	S	4	0.0455568	0.0404786	-1.89299	1.63623
AAGTGAACAAATAAGC-1_1	NX1	Nx	08d	30348	5227	4.251	19.418	0.033	0.665095	-0.329831	S	1	0.0320019	0.0404786	4.56145	4.13372
AAGTGAACACCCTATC-1_1	NX1	Nx	08d	17313	3329	5.528	33.125	0.012	-0.05191	-0.259095	G1	6	0	0.0404786	-0.8237	-13.4794
AAGTGAACATTGTGCA-1_1	NX1	Nx	08d	15690	3933	5.946	22.76	0.019	0.197813	-0.499649	S	0	0.0544205	0.0404786	-0.243941	-0.369866
AAGTGAAGTGAGACCA-1_1	NX1	Nx	08d	18289	4495	6.015	17.535	0.038	0.0216735	-0.489164	S	4	0.0455568	0.0404786	-0.898012	2.0584
AAGTGAAGTGATTAGA-1_1	NX1	Nx	08d	9925	3080	5.572	27.003	0.01	-0.0941097	-0.293332	G1	2	0.0971621	0.374009	-2.10891	-1.44302
AAGTGAATCTCTGGTC-1_1	NX1	Nx	08d	14861	4052	6.144	21.405	0.027	-0.210537	-0.647956	G1	2	0.0971621	0.0404786	-0.0817159	-3.21968
AAGTTCGAGCTACGTT-1_1	NX1	Nx	08d	22807	4920	5.972	22.348	0.031	1.01275	-0.35593	S	3	0.0239706	0.0404786	4.98992	5.50976
AAGTTCGAGGGATCAC-1_1	NX1	Nx	08d	18571	4496	5.379	21.722	0.027	-0.437851	-0.668621	G1	0	0.0544205	0.177399	1.30033	0.0599493
AAGTTCGAGTTCCGGC-1_1	NX1	Nx	08d	13253	3716	2.799	29.639	0.03	0.0232173	-0.317891	S	2	0.0971621	0.28906	-4.03227	-2.39039
AAGTTCGCAACGATTC-1_1	NX1	Nx	08d	13083	3589	3.279	28.312	0.023	0.178367	-0.422898	S	5	0.0236857	0.0404786	-12.2097	-4.42102
AATAGAGAGTTGGAAT-1_1	NX1	Nx	08d	36085	5797	3.151	22.167	0.011	0.178651	1.06991	G2M	1	0.0320019	0.0404786	5.32604	3.97469
AATAGAGCAGGTACGA-1_1	NX1	Nx	08d	12728	3655	6.977	20.922	0.039	0.0316416	-0.460767	S	2	0.0971621	0.0404786	-0.12563	-2.47114
AATAGAGCATTCCTCG-1_1	NX1	Nx	08d	11855	3494	4.015	22.775	0.051	-0.0202792	-0.459375	G1	3	0.0239706	0.0404786	-4.94834	2.11614
AATAGAGTCACCGCTT-1_1	NX1	Nx	08d	17315	4524	4.77	19.324	0.012	0.241801	-0.719929	S	0	0.0544205	0.250573	-1.18664	0.0927168
AATAGAGTCATCTCTA-1_1	NX1	Nx	08d	67633	7862	4.192	26.426	0.024	0.0388925	-0.0730701	S	5	0.0236857	0.0646147	-11.4299	-4.18397
AATAGAGTCTGTACAG-1_1	NX1	Nx	08d	39559	6039	4.234	19.861	0.028	0.187001	-0.465928	S	1	0.0320019	0.0404786	4.22549	5.05361
AATAGAGTCTTAGCAG-1_1	NX1	Nx	08d	16352	4052	4.954	22.254	0.012	-0.198519	-0.190648	G1	5	0.0236857	0.0404786	-12.4054	-4.65926
AATCACGAGATAGCTA-1_1	NX1	Nx	08d	13334	3730	5.205	25.769	0.022	0.0451305	-0.404621	S	3	0.0239706	0.0404786	-4.39952	2.65078
AATCACGCAAAGGGTC-1_1	NX1	Nx	08d	14902	3934	4.919	23.99	0.013	0.0709214	1.19332	G2M	2	0.0971621	0.0646147	-2.28634	2.30555
AATCACGCAGCTATTG-1_1	NX1	Nx	08d	13879	3931	4.835	21.428	0.022	-0.0762754	-0.435539	G1	2	0.0971621	0.0404786	-2.28233	-1.46884
AATCGACCAAAGGCAC-1_1	NX1	Nx	08d	25026	4975	4.555	17.078	0.02	-0.13831	-0.555932	G1	1	0.0320019	0.135375	5.06883	4.82523
AATCGACCAATACCTG-1_1	NX1	Nx	08d	18253	4363	4.388	21.575	0.033	-0.383715	-0.485351	G1	0	0.0544205	0.0404786	-0.87291	0.0937395
AATCGACTCGTTCCTG-1_1	NX1	Nx	08d	23162	5105	4.697	20.08	0.026	-0.165018	-0.687616	G1	4	0.0455568	0.0404786	0.376858	1.92011
AATCGTGCAGGTTCCG-1_1	NX1	Nx	08d	9375	2953	4.971	25.28	0.021	-0.0746602	0.795967	G2M	0	0.0544205	0.0404786	1.71919	0.780765
AATCGTGGTCTATGAC-1_1	NX1	Nx	08d	40183	5907	2.66	22.149	0.007	0.285743	1.34011	G2M	1	0.0320019	0.0404786	4.00871	4.0882
AATGAAGAGTAGGGTC-1_1	NX1	Nx	08d	18568	4266	5.466	21.37	0.016	-0.219141	-0.618789	G1	1	0.0320019	0.0404786	2.9671	5.08074
AATGAAGAGTTGTAAG-1_1	NX1	Nx	08d	10162	3246	8.65	26.54	0	-0.000162352	-0.640857	G1	0	0.0544205	0.135375	3.12358	-0.867969
AATGAAGGTGACAGGT-1_1	NX1	Nx	08d	11210	3160	5.174	25.558	0	-0.297532	-0.399727	G1	1	0.0320019	0.0404786	1.14336	-3.30174
AATGACCCAGCCGTCA-1_1	NX1	Nx	08d	15269	4072	4.624	23.446	0.039	0.265301	-0.364288	S	5	0.0236857	0.177399	-11.5094	-4.25624
AATGACCCAGCTGTTA-1_1	NX1	Nx	08d	20503	4895	3.385	19.27	0.039	0.655786	1.09536	G2M	4	0.0455568	0.205118	-0.449471	1.4227
AATGCCAAGATCCAAA-1_1	NX1	Nx	08d	20812	4524	4.339	22.521	0.014	-0.0816482	-0.326921	G1	0	0.0544205	0.0404786	4.3779	-1.11725
AATGCCAGTCGCAGTC-1_1	NX1	Nx	08d	17356	4021	5.675	26.077	0.006	0.232665	-0.298568	S	4	0.0455568	0.0404786	0.64737	2.62355
AATGCCATCAGTGATC-1_1	NX1	Nx	08d	13288	3411	4.734	26.452	0.015	-0.0413577	-0.541794	G1	2	0.0971621	0.0404786	-0.86864	-1.89766
AATGGAAAGAATTCAG-1_1	NX1	Nx	08d	15312	4021	6.054	23.217	0.039	-0.434986	-0.561541	G1	2	0.0971621	0.0404786	-0.0270651	-3.26348
AATGGAACAACGACTT-1_1	NX1	Nx	08d	26568	5548	5.017	13.994	0.034	0.854575	0.846697	S	1	0.0320019	0.0404786	2.60295	5.06577
AATGGCTTCACTGGGC-1_1	NX1	Nx	08d	10938	3289	3.09	25.809	0.046	-0.237107	-0.591025	G1	2	0.0971621	0.205118	-2.48266	-2.73548
AATTCCTAGGTACCTT-1_1	NX1	Nx	08d	16231	4224	4.775	25.864	0.006	-0.248117	-0.643516	G1	2	0.0971621	0.0404786	-2.11333	-1.80095
AATTCCTAGGTGCTTT-1_1	NX1	Nx	08d	11755	3820	7.282	18.154	0.026	-0.0359597	-0.466581	G1	2	0.0971621	0.0404786	-2.49423	-3.23936
AATTCCTCATGTTCAG-1_1	NX1	Nx	08d	46028	6804	5.497	19.471	0.026	0.665563	-0.740906	S	1	0.0320019	0.0404786	4.47606	2.65106
AATTCCTTCAGCGGAA-1_1	NX1	Nx	08d	33475	5945	5.066	20.23	0.024	0.27273	1.57053	G2M	4	0.0455568	0.0404786	0.483973	2.02419
AATTTCCCAGATCATC-1_1	NX1	Nx	08d	57359	7638	5.507	18.888	0.035	0.590069	-0.496229	S	0	0.534811	0.0404786	0.576708	1.73974
AATTTCCTCCTTACCG-1_1	NX1	Nx	08d	33942	6039	7.315	15.559	0.024	0.145256	-0.087151	S	1	0.0320019	0.110069	6.6397	3.3487
ACAACCACATGTTCAG-1_1	NX1	Nx	08d	21483	4828	5.344	25.746	0.023	-0.0198541	-0.597536	G1	2	0.0971621	0.0404786	-1.92039	-3.81851
ACAACCAGTATCGTAC-1_1	NX1	Nx	08d	19251	4837	5.688	22.144	0.026	1.37991	0.67394	S	2	0.0971621	0.931585	-2.18432	-3.21686
ACAAGCTAGCAATAGT-1_1	NX1	Nx	08d	15508	4066	3.727	26.212	0.006	0.384398	-0.471461	S	2	0.430188	0.0404786	-1.72126	0.407414
ACAAGCTTCTTTGCTA-1_1	NX1	Nx	08d	15001	4031	4.666	23.498	0.027	-0.287247	-0.531206	G1	2	0.0971621	0.0404786	-0.519969	-2.16531
ACACAGTAGAACGTGC-1_1	NX1	Nx	08d	30841	5934	4.945	18.534	0.026	0.189817	1.66719	G2M	0	0.0544205	0.0404786	4.42816	-0.0246083
ACACCAAAGACTGTTC-1_1	NX1	Nx	08d	16468	4150	5.344	22.674	0.012	-0.253259	-0.7364	G1	2	0.0971621	0.0404786	-0.521793	-3.16998
ACACCAAAGAGCATTA-1_1	NX1	Nx	08d	18378	3978	3.88	26.009	0.005	-0.248205	0.156408	G2M	4	0.0455568	0.0956426	-0.054522	2.8259
ACACCAAGTCGTCAGC-1_1	NX1	Nx	08d	38802	6352	4.283	15.417	0.031	1.02084	0.0694187	S	1	0.0320019	0.0404786	5.02664	4.58863
ACACCAAGTTACAGCT-1_1	NX1	Nx	08d	54421	6577	2.606	19.957	0.02	0.39159	1.4241	G2M	1	0.0320019	0.0404786	6.39046	4.18537
ACACGCGCAATAACGA-1_1	NX1	Nx	08d	29518	5412	4.489	18.304	0.024	0.00559152	1.68616	G2M	1	0.0320019	0.0404786	3.3479	3.83782
ACACGCGCAGAGGCAT-1_1	NX1	Nx	08d	15487	3816	5.308	26.228	0	-0.168544	-0.537452	G1	3	0.0239706	0.0404786	-4.37785	3.41152
ACACGCGTCACCGGGT-1_1	NX1	Nx	08d	28078	5285	4.413	19.578	0.032	0.485855	0.640652	G2M	1	0.0320019	0.0404786	5.82693	4.16968
ACACTGACAGAGGAAA-1_1	NX1	Nx	08d	15766	4292	2.601	18.737	0.013	0.439543	-0.445392	S	1	0.0320019	0.177399	1.14636	4.95372
ACACTGACATCGCTCT-1_1	NX1	Nx	08d	19287	4910	6.248	17.96	0.016	1.17343	-0.0120728	S	0	0.0544205	0.0646147	2.33592	-0.881671
ACACTGAGTCGATGCC-1_1	NX1	Nx	08d	19296	4391	5.022	23.73	0.021	0.940813	-0.522846	S	0	0.0544205	0.135375	-0.996524	-0.092823
ACACTGATCCGTGTCT-1_1	NX1	Nx	08d	19081	4443	5.906	21.383	0.031	-0.153013	-0.648445	G1	0	0.0544205	0.0404786	-1.26835	-0.0876031
ACACTGATCGAATCCA-1_1	NX1	Nx	08d	20237	4689	5.678	18.842	0.01	-0.39254	-0.635749	G1	0	0.529544	0.0404786	2.36473	-2.04831
ACAGAAACAGAATTCC-1_1	NX1	Nx	08d	13911	3938	6.786	18.597	0.014	0.865345	-0.337523	S	0	0.0544205	0.250573	1.9163	0.717951
ACAGAAACATGATCTG-1_1	NX1	Nx	08d	30767	5424	1.849	20.337	0.046	0.762887	1.02196	G2M	5	0.0236857	0.181218	-11.0862	-3.93882
ACAGAAATCTCACCCA-1_1	NX1	Nx	08d	13146	3460	4.283	24.479	0.068	-0.271197	-0.550207	G1	0	0.0544205	0.303249	1.87348	0.37021
ACAGCCGCAGAATGTA-1_1	NX1	Nx	08d	10868	3323	5.539	21.614	0.028	-0.0275938	-0.0157921	G1	2	0.0971621	0.0404786	0.79663	-4.10855
ACAGCCGCAGTCAGCC-1_1	NX1	Nx	08d	114974	8535	1.956	19.499	0.019	0.989218	0.435683	S	1	0.0320019	0.177399	7.20133	4.84443
ACAGCCGGTTATCCAG-1_1	NX1	Nx	08d	26326	5389	5.033	21.902	0.034	-0.610026	-0.209917	G1	0	0.0544205	0.0404786	4.89922	-0.434908
ACAGCCGTCTGCGATA-1_1	NX1	Nx	08d	30250	5071	5.302	21.94	0.013	0.116872	0.264891	G2M	1	0.0320019	0.0404786	3.86829	5.28412
ACAGGGAGTCAGGTGA-1_1	NX1	Nx	08d	49478	7291	4.541	20.167	0.034	0.57404	1.41359	G2M	1	0.0320019	0.0404786	1.50141	-2.54794
ACAGGGATCGAGAAAT-1_1	NX1	Nx	08d	9353	3185	6.105	21.073	0.032	-0.141884	-0.51579	G1	0	0.0544205	0.233633	3.51657	-1.14005
ACAGGGATCTATACTC-1_1	NX1	Nx	08d	33755	5238	4.719	22.986	0.003	-0.134023	0.212414	G2M	1	0.0320019	0.0404786	3.57061	4.89427
ACATCCCCACAACGTT-1_1	NX1	Nx	08d	21800	4887	3.56	22.014	0.014	-0.379613	-0.668963	G1	2	0.0971621	0.0404786	-1.39661	-3.58803
ACATCCCCATGTGCTA-1_1	NX1	Nx	08d	25457	5137	6.501	21.448	0	0.83196	-0.496027	S	4	0.0455568	0.0404786	-0.686343	1.89938
ACATCGAGTTGTCTAG-1_1	NX1	Nx	08d	21223	4380	4.123	21.255	0.019	-0.263627	-0.255947	G1	1	0.0320019	0.0404786	3.49301	5.20072
ACATCGATCGACATCA-1_1	NX1	Nx	08d	70724	6880	0.966	27.31	0.018	-0.0994546	-0.665307	G1	1	0.0320019	0.0404786	7.13823	4.3982
ACATGCAAGAGCTTTC-1_1	NX1	Nx	08d	13339	3710	5.608	22.625	0.007	-0.123537	-0.463839	G1	0	0.0544205	0.0646147	2.60761	-0.857784
ACATGCACATTGAGGG-1_1	NX1	Nx	08d	31025	5471	3.02	18.121	0.003	0.472881	0.766056	G2M	1	0.0320019	0.0646147	4.3564	5.13575
ACATTTCGTCCAGCGT-1_1	NX1	Nx	08d	45250	6803	4.272	21.187	0.015	-0.469318	-0.757862	G1	0	0.0544205	0.177399	1.41898	-1.17201
ACATTTCGTTCTTGTT-1_1	NX1	Nx	08d	25146	4798	4.37	27.364	0.024	0.437547	0.868432	G2M	5	0.0236857	0.0404786	-11.4325	-4.2515
ACATTTCGTTGTCATG-1_1	NX1	Nx	08d	8612	2129	0.023	39.248	0.012	0.106301	-0.164393	S	1	0.441542	0.0646147	4.46102	3.90101
ACATTTCTCAAAGAAC-1_1	NX1	Nx	08d	22897	5103	4.494	19.885	0.004	0.0911225	-0.669461	S	0	0.0544205	0.0404786	4.87577	0.282306
ACATTTCTCGACCCAG-1_1	NX1	Nx	08d	8650	2786	1.769	7.052	0.058	-0.460594	-0.350545	G1	9	0	0.233633	-7.56197	-9.50473
ACCAAACAGTCATCGT-1_1	NX1	Nx	08d	25608	4919	5.674	18.822	0.008	-0.15318	0.220652	G2M	1	0.0320019	0.0404786	3.10345	5.42792
ACCAAACTCTTTGGAG-1_1	NX1	Nx	08d	17627	4323	4.47	23.373	0.023	0.318685	-0.374602	S	0	0.0544205	0.0404786	0.477171	0.0196846
ACCAACAAGAGCTTTC-1_1	NX1	Nx	08d	14330	3659	4.843	29.895	0	0.0964152	-0.00504245	S	3	0.0239706	0.0404786	-3.07436	2.7691
ACCAACAGTAGCACGA-1_1	NX1	Nx	08d	12067	3675	3.713	23.361	0.041	-0.138302	1.31877	G2M	2	0.0971621	0.0404786	-2.16622	-2.61401
ACCAACAGTCCCAAAT-1_1	NX1	Nx	08d	30645	5714	4.559	22.78	0.036	0.0549436	-0.638263	S	0	0.0544205	0.0404786	0.452116	0.873532
ACCAACATCCTGATAG-1_1	NX1	Nx	08d	26409	3760	1.337	34.113	0.015	0.0999643	-0.276589	S	7	0.0277228	0.177399	-7.72097	-6.87575
ACCACAAAGCCTATCA-1_1	NX1	Nx	08d	24258	5169	2.927	17.693	0.025	0.0661268	-0.630907	S	2	0.0971621	0.303249	-3.0858	0.178035
ACCACAACAACCGTAT-1_1	NX1	Nx	08d	14062	3309	4.786	25.58	0.036	-0.157225	-0.256522	G1	1	0.0320019	0.0404786	14.0602	-1.90615
ACCACAATCTCTCTAA-1_1	NX1	Nx	08d	30372	5830	3.744	18.78	0.026	0.985753	-0.507778	S	1	0.0320019	0.0404786	2.93687	2.42861
ACCATTTCATCATTGG-1_1	NX1	Nx	08d	22431	4907	3.847	22.505	0.018	-0.3529	0.371109	G2M	0	0.0544205	0.0404786	1.82515	0.506076
ACCATTTTCACGAGGA-1_1	NX1	Nx	08d	16865	3949	4.868	27.453	0.03	0.0657817	-0.691333	S	4	0.0455568	0.0404786	0.285623	1.48934
ACCATTTTCCAGTACA-1_1	NX1	Nx	08d	67827	8142	3.382	18.818	0.024	0.214761	1.4449	G2M	2	0.0971621	0.0404786	-4.50265	-0.893188
ACCCAAACAAGCACAG-1_1	NX1	Nx	08d	22719	5108	4.239	23.342	0.018	1.34251	0.821527	S	3	0.0239706	0.0404786	-4.2323	1.01404
ACCCAAACATATCTCT-1_1	NX1	Nx	08d	4809	1671	0.042	39.01	0	0.702629	1.39177	G2M	5	0.0236857	0.0404786	-10.0608	-3.49889
ACCCAAATCATGTCTT-1_1	NX1	Nx	08d	33221	5513	2.869	23.088	0.009	0.954651	0.328698	S	6	0	0.0646147	-0.902287	-13.298
ACCCTCAAGCGTTCCG-1_1	NX1	Nx	08d	75642	7908	4.361	20.507	0.02	0.734073	1.19717	G2M	0	0.0544205	0.0404786	4.6867	1.39891
ACCCTCAAGGTCGTGA-1_1	NX1	Nx	08d	16677	3553	5.445	31.468	0.018	0.00330288	-0.310907	S	5	0.0236857	0.0404786	-12.3884	-4.57261
ACCCTCACAATGTTGC-1_1	NX1	Nx	08d	34858	5890	4.246	23.381	0.032	0.60105	1.60895	G2M	3	0.0239706	0.177399	-4.51597	2.56386
ACCCTCACAGTTCCAA-1_1	NX1	Nx	08d	21561	5030	1.711	21.845	0.009	0.687069	1.91164	G2M	2	0.0971621	0.135375	-5.01524	-2.39085
ACCCTCATCTCTCCGA-1_1	NX1	Nx	08d	20272	4904	5.402	17.043	0.02	-0.138726	-0.0110463	G1	0	0.0544205	0.0404786	0.930736	-0.515694
ACCCTTGCACTTGTGA-1_1	NX1	Nx	08d	20027	3961	5.567	33.5	0.01	1.04096	-0.0926186	S	6	0	0.0404786	0.699321	-13.324
ACCGTTCAGAGCGACT-1_1	NX1	Nx	08d	35104	5546	4.546	19.898	0.009	0.358377	0.781723	G2M	1	0.0320019	0.0404786	6.06866	3.47521
ACCGTTCTCGAGCTGC-1_1	NX1	Nx	08d	45957	6399	3.233	17.975	0.017	-0.265143	-0.206076	G1	1	0.0320019	0.0404786	7.44561	4.25705
ACCGTTCTCTCCTACG-1_1	NX1	Nx	08d	33681	6238	4.21	17.933	0.021	0.240264	1.9878	G2M	0	0.0544205	0.0404786	0.585591	-0.405275
ACCTACCAGACAGCGT-1_1	NX1	Nx	08d	8715	2881	2.157	27.803	0.011	-0.434488	-0.17064	G1	2	0.0971621	0.374009	-4.42482	-1.19428
ACCTACCAGGTAACTA-1_1	NX1	Nx	08d	16093	4025	2.448	27.198	0.012	-0.161081	-0.588923	G1	8	0	0.893901	5.78678	-9.62889
ACCTACCCACTCCCTA-1_1	NX1	Nx	08d	27554	5566	4.867	20.933	0.022	-0.0438095	-0.745473	G1	0	0.0544205	0.0404786	3.27966	-1.42689
ACCTACCTCAGTCTTT-1_1	NX1	Nx	08d	45046	6803	4.431	18.976	0.024	0.706058	1.34565	G2M	0	0.0544205	0.0404786	4.06981	-0.578523
ACCTACCTCCGGTTCT-1_1	NX1	Nx	08d	34925	5954	4.435	13.311	0.04	-0.21381	-0.59923	G1	1	0.0320019	0.0404786	4.91225	4.468
ACCTGAAAGAGAAGGT-1_1	NX1	Nx	08d	22982	2444	2.976	29.097	0	-0.240305	-0.193252	G1	7	0.0277228	0.0404786	-8.1507	-6.42813
ACCTGAAGTTGTCATG-1_1	NX1	Nx	08d	6252	1543	3.519	5.838	0.016	-0.335101	-0.180185	G1	9	0	0.233633	-7.6102	-8.76399
ACCTGTCAGAGCCGTA-1_1	NX1	Nx	08d	16190	3972	2.483	25.788	0.012	0.136783	-0.441659	S	2	0.0971621	0.443753	-3.75063	-0.825221
ACCTGTCGTGAGATCG-1_1	NX1	Nx	08d	22719	5070	5.766	21.766	0.018	-0.0427918	1.57465	G2M	0	0.0544205	0.0404786	3.91414	-2.08834
ACCTGTCGTGCGGATA-1_1	NX1	Nx	08d	15279	3941	6.558	27.247	0.013	1.29831	0.746431	S	3	0.0239706	0.0404786	-3.57415	3.00661
ACGATCAAGGCGCTCT-1_1	NX1	Nx	08d	24834	4852	5.424	35.262	0.004	1.20347	0.00675499	S	10	0	0.893901	14.0329	-1.93914
ACGATCAAGGTATTGA-1_1	NX1	Nx	08d	43430	5761	3.055	29.615	0.016	0.676664	1.33605	G2M	6	0	0.0404786	-1.1001	-13.384
ACGATCAAGTGCACTT-1_1	NX1	Nx	08d	28079	5435	4.783	16.479	0.014	0.258673	-0.650371	S	1	0.0320019	0.0404786	2.14	4.81165
ACGATCATCGTAGGAG-1_1	NX1	Nx	08d	11754	3582	4.807	21.567	0.017	-0.323231	-0.563576	G1	2	0.0971621	0.443753	-2.56359	-2.68833
ACGATGTAGCACCTGC-1_1	NX1	Nx	08d	30542	5990	4.567	17.32	0.013	1.42884	-0.0233613	S	1	0.0320019	0.0404786	2.02583	3.35143
ACGATGTTCCCGTTCA-1_1	NX1	Nx	08d	26910	5228	2.066	21.237	0.033	0.739012	1.44299	G2M	0	0.0544205	0.0404786	-1.49068	2.97018
ACGCACGAGACTTCCA-1_1	NX1	Nx	08d	22073	4999	4.616	24.872	0.027	0.847043	-0.0206692	S	3	0.0239706	0.0404786	-4.12229	3.03332
ACGCACGAGCTAAATG-1_1	NX1	Nx	08d	29618	4878	5.031	26.497	0.003	0.155856	1.00233	G2M	0	0.0544205	0.0404786	4.92696	1.71127
ACGCACGTCTCACTCG-1_1	NX1	Nx	08d	30318	5892	5.159	15.008	0.016	0.414422	1.15913	G2M	1	0.0320019	0.0404786	1.52688	4.87439
ACGGAAGAGGTACATA-1_1	NX1	Nx	08d	6149	2213	3.513	26.996	0	0.119448	0.853322	G2M	0	0.0544205	0.205118	-1.27801	0.510953
ACGGAAGAGTTAGAAC-1_1	NX1	Nx	08d	15284	3675	3.435	22.991	0.013	1.13211	0.060771	S	1	0.0320019	0.0404786	5.13982	4.5359
ACGGAAGCACATTACG-1_1	NX1	Nx	08d	24598	4937	1.874	28.454	0.024	0.502239	0.739543	G2M	5	0.0236857	0.177399	-9.55767	-4.28688
ACGGAAGCAGCTGTTA-1_1	NX1	Nx	08d	37277	5903	3.348	26.488	0.016	0.785834	0.473128	S	4	0.0455568	0.0404786	0.586831	2.67316
ACGGGTCAGAATAGTC-1_1	NX1	Nx	08d	16535	3970	7.832	28.775	0.036	0.12851	-0.482942	S	5	0.0236857	0.0404786	-10.8395	-4.61503
ACGGGTCAGTCCGCGT-1_1	NX1	Nx	08d	10806	3222	3.637	24.2	0.019	-0.121522	0.223362	G2M	2	0.0971621	0.0404786	-4.46676	-1.2769
ACGGGTCCAAACTAAG-1_1	NX1	Nx	08d	16053	4002	7.918	22.432	0.025	-0.374269	-0.733251	G1	2	0.0971621	0.0404786	-1.66722	-3.46955
ACGGGTCCAATCTCTT-1_1	NX1	Nx	08d	33142	5108	4.333	28.39	0.009	1.19833	0.660242	S	6	0	0.181218	0.378209	-13.5319
ACGGGTCTCCTAGCTC-1_1	NX1	Nx	08d	12787	3581	5.607	23.266	0.023	-0.0866019	-0.673575	G1	2	0.0971621	0.0404786	-2.33644	-2.57221
ACGGGTCTCTCCGAAA-1_1	NX1	Nx	08d	52733	7425	6.233	21.252	0.013	0.0881964	0.826567	G2M	1	0.0320019	0.0404786	1.45376	-2.51
ACGGTCGAGGCCCACT-1_1	NX1	Nx	08d	29931	5124	2.733	22.662	0.027	0.207939	-0.364975	S	1	0.0320019	0.0404786	4.34103	5.26953
ACGGTCGAGTCAGCCC-1_1	NX1	Nx	08d	22864	4269	5.38	21.842	0.022	0.0606668	-0.342778	S	1	0.0320019	0.0404786	4.0135	5.0616
ACGGTCGGTCGTGATT-1_1	NX1	Nx	08d	15999	4078	5.782	21.464	0.013	-0.111815	-0.336609	G1	0	0.0544205	0.0404786	-0.914398	3.36895
ACGGTTAAGAGGCGTT-1_1	NX1	Nx	08d	13402	3438	6.842	28.324	0.022	0.370599	-0.471917	S	2	0.509054	0.0404786	-3.37182	-0.48582
ACGGTTAAGGACTTCT-1_1	NX1	Nx	08d	20209	4315	1.222	22.381	0.025	-0.461897	-0.484907	G1	8	0	0.0404786	5.87628	-9.58929
ACGGTTAGTACTCGAT-1_1	NX1	Nx	08d	12813	3986	6.127	21.767	0.062	-0.0961112	-0.624093	G1	2	0.0971621	0.0646147	-3.69484	-0.919282
ACGGTTATCACCATCC-1_1	NX1	Nx	08d	22335	4678	4.231	23.967	0.045	0.00641818	-0.638499	S	4	0.0455568	0.931585	0.74809	2.23471
ACGGTTATCATGAGTC-1_1	NX1	Nx	08d	25434	5370	7.179	18.581	0.016	0.218706	2.03387	G2M	4	0.0455568	0.0404786	-1.46975	1.05092
ACGGTTATCGCCGAAC-1_1	NX1	Nx	08d	43230	6635	4.478	20.234	0.014	0.472892	-0.282251	S	0	0.0544205	0.0404786	2.66503	-0.787994
ACGTAACAGATGACCG-1_1	NX1	Nx	08d	24265	5176	5.646	21.508	0.012	0.382088	-0.139015	S	0	0.0544205	0.303249	4.02943	-1.05375
ACGTAACTCAATCCGA-1_1	NX1	Nx	08d	36219	5580	4.398	17.701	0.011	-0.444092	-0.652649	G1	1	0.0320019	0.0404786	5.73917	5.52854
ACGTAACTCAATCTCT-1_1	NX1	Nx	08d	30827	5616	4.853	24.543	0.013	0.549026	1.92724	G2M	6	0	0.0404786	0.281319	-13.5349
ACGTACAAGATAGTGT-1_1	NX1	Nx	08d	12340	3504	7.812	23.679	0.024	-0.129904	-0.525307	G1	2	0.0971621	0.0404786	-2.37854	-2.7145
ACGTACAGTTCATCGA-1_1	NX1	Nx	08d	18902	4519	5.269	22.712	0.021	1.34275	0.585192	S	2	0.0971621	0.0404786	-2.08667	-1.1443
ACGTACATCAGTCATG-1_1	NX1	Nx	08d	25577	5207	4.355	18.693	0.012	1.2181	0.265634	S	2	0.0971621	0.0404786	-3.83971	-0.558028
ACGTAGTAGAGCAAGA-1_1	NX1	Nx	08d	11341	3066	6.26	30.112	0.018	-0.0574756	-0.458727	G1	2	0.0971621	0.0404786	-4.75439	-2.27894
ACGTAGTAGCACAAAT-1_1	NX1	Nx	08d	17235	3985	5.831	27.856	0.006	0.418384	-0.544347	S	4	0.0455568	0.0404786	-2.11012	0.80153
ACGTAGTAGGTACTGG-1_1	NX1	Nx	08d	32452	5932	5.14	20.738	0.015	0.318715	1.32724	G2M	1	0.0320019	0.0404786	4.62779	2.74066
ACGTAGTAGGTGATCG-1_1	NX1	Nx	08d	27290	4945	6.746	20.773	0.022	-0.181021	-0.528599	G1	1	0.0320019	0.0404786	3.30547	5.32073
ACGTAGTAGTGAGCCA-1_1	NX1	Nx	08d	22719	4749	5.951	24.609	0.018	-0.0772696	-0.677157	G1	0	0.448052	0.0404786	2.73728	1.48787
ACGTCCTGTAAGGCCA-1_1	NX1	Nx	08d	16891	4618	2.149	18.578	0.03	-0.33359	-0.671383	G1	2	0.0971621	0.0404786	0.321644	-3.12888
ACGTCCTTCCTTCAGC-1_1	NX1	Nx	08d	50926	7170	4.664	19.907	0.029	0.289846	0.847382	G2M	0	0.0544205	0.0404786	2.61889	0.16801
ACGTTCCAGTAACCTC-1_1	NX1	Nx	08d	19089	4485	4.091	24.25	0.037	0.451565	-0.445035	S	0	0.0544205	0.0404786	2.76247	-1.65413
ACGTTCCAGTGAGCCA-1_1	NX1	Nx	08d	16537	4012	5.104	24.557	0.018	0.0689788	-0.334612	S	4	0.0455568	0.0404786	0.703607	2.51178
ACGTTCCCAACAGTGG-1_1	NX1	Nx	08d	17227	4145	4.249	24.299	0.029	-0.10684	-0.534486	G1	0	0.0544205	0.0404786	-1.41956	2.82186
ACGTTCCGTCTAGGCC-1_1	NX1	Nx	08d	38977	6317	4.513	20.681	0.026	0.577195	1.27041	G2M	0	0.0544205	0.0404786	3.94931	-0.557571
ACGTTCCGTGATACTC-1_1	NX1	Nx	08d	22331	4909	4.823	20.035	0.031	0.269962	-0.49448	S	1	0.459144	0.0404786	1.73413	2.17656
ACGTTCCGTTGCTCAA-1_1	NX1	Nx	08d	27057	5597	5.108	17.437	0.011	0.224913	2.10229	G2M	2	0.0971621	0.0404786	-1.3068	-2.56906
ACTACGAGTGTGTCCG-1_1	NX1	Nx	08d	42051	6308	5.8	25.167	0.01	0.535639	0.0418376	S	0	0.0544205	0.177399	-1.22551	2.62581
ACTACGATCACCCATC-1_1	NX1	Nx	08d	33987	5427	3.872	19.381	0.012	-0.100078	-0.605967	G1	1	0.0320019	0.177399	5.5456	4.45559
ACTATCTCATGCAGCC-1_1	NX1	Nx	08d	32478	6415	3.541	19.222	0.025	0.151714	0.916471	G2M	2	0.0971621	0.135375	-3.36629	-1.76681
ACTATCTGTTCCTAGA-1_1	NX1	Nx	08d	18911	4528	3.115	20.623	0.021	1.50572	0.319269	S	0	0.0544205	0.0404786	-1.19977	0.193506
ACTATGGCACCCTAGG-1_1	NX1	Nx	08d	16766	4189	3.77	23.733	0.006	-0.27636	0.651745	G2M	0	0.0544205	0.0404786	-1.07937	3.12276
ACTATGGGTCACTCTC-1_1	NX1	Nx	08d	14997	4176	3.807	19.311	0.007	0.0536635	-0.548247	S	0	0.0544205	0.0404786	-0.0179562	-0.84497
ACTATGGGTGCTAGCC-1_1	NX1	Nx	08d	25477	5035	3.839	22.938	0.016	-0.0784444	1.07304	G2M	3	0.0239706	0.0404786	0.254655	4.18525
ACTATGGTCATCGCAA-1_1	NX1	Nx	08d	25912	4978	3.666	19.423	0.008	1.15043	-0.0108354	S	3	0.0239706	0.303249	-0.856424	5.09952
ACTATTCAGCGAGTAC-1_1	NX1	Nx	08d	28610	5675	5.564	24.023	0.014	0.76068	-0.197163	S	0	0.0544205	0.931585	-2.45172	1.78541
ACTATTCTCTGACAGT-1_1	NX1	Nx	08d	32707	5911	5.088	20.925	0.031	0.376382	1.70395	G2M	0	0.0544205	0.0404786	-0.310074	0.847885
ACTCCCAAGCTGTACT-1_1	NX1	Nx	08d	26634	4404	6.251	37.467	0.011	0.0346459	-0.267319	S	5	0.0236857	0.0404786	-12.3479	-4.563
ACTCTCGCACCCATAA-1_1	NX1	Nx	08d	19321	4626	4.575	22.747	0.016	0.0345419	-0.630138	S	2	0.0971621	0.180829	-4.70414	-1.34055
ACTGATGCAAGCCATT-1_1	NX1	Nx	08d	19725	2643	0.877	20.243	0	-0.319992	-0.297529	G1	7	0.0277228	0.0404786	-8.33669	-6.07726
ACTGATGCATATCTGG-1_1	NX1	Nx	08d	49330	7351	5.181	18.038	0.03	0.29773	0.935823	G2M	4	0.0455568	0.0404786	0.008546	1.46612
ACTGATGCATCAGCGC-1_1	NX1	Nx	08d	21713	4921	4.854	24.009	0.018	0.648225	-0.56119	S	2	0.0971621	0.0404786	-1.6461	-2.08796
ACTGCAAAGCCATTGT-1_1	NX1	Nx	08d	36520	6683	4.833	20.408	0.033	0.350659	0.661765	G2M	0	0.0544205	0.0404786	0.622649	-0.67057
ACTGCAAAGGCCTGCT-1_1	NX1	Nx	08d	48803	6798	4.664	20.529	0.016	0.839026	0.294067	S	1	0.0320019	0.0404786	3.40487	5.3669
ACTGCAAAGTTGAAAC-1_1	NX1	Nx	08d	11970	3614	6.04	19.942	0.008	0.066374	-0.2453	S	0	0.0544205	0.303249	2.56202	0.927777
ACTGCAACACGTGTGC-1_1	NX1	Nx	08d	17049	4491	3.032	20.465	0.035	0.388337	-0.504409	S	2	0.0971621	0.0404786	-2.77657	-3.64139
ACTGCAACATCTCAAG-1_1	NX1	Nx	08d	19943	4420	5.656	20.885	0.03	-0.01693	-0.628763	G1	1	0.0320019	0.0404786	1.96795	-3.01975
ACTGCAATCCAGGACC-1_1	NX1	Nx	08d	13422	3861	6.303	21.308	0.045	-0.365205	-0.708244	G1	2	0.0971621	0.135375	-1.36483	-3.70879
ACTGTCCAGAGGCGGA-1_1	NX1	Nx	08d	29132	5672	6.052	21.203	0.031	0.254137	1.76757	G2M	0	0.0544205	0.0404786	-1.16836	2.39387
ACTGTCCAGCACTCGC-1_1	NX1	Nx	08d	24549	4090	2.766	37.101	0.012	0.0871389	0.208416	G2M	7	0.0277228	0.233633	-7.77842	-6.87616
ACTGTCCAGGATCACG-1_1	NX1	Nx	08d	27923	5170	2.625	18.479	0.025	-0.184634	-0.597291	G1	1	0.0320019	0.0404786	6.46729	4.66533
ACTGTCCAGGTTGGAC-1_1	NX1	Nx	08d	33823	5784	3.935	21.414	0.018	0.418771	0.896242	G2M	3	0.0239706	0.0404786	-1.05615	5.20466
ACTGTCCCAGCTATTG-1_1	NX1	Nx	08d	40732	6686	4.682	20.885	0.032	0.678898	-0.490118	S	4	0.0455568	0.0404786	-0.603592	1.85192
ACTGTCCGTGACGCCT-1_1	NX1	Nx	08d	33453	5900	5.895	20.387	0.024	0.219344	1.57585	G2M	0	0.0544205	0.0646147	4.79714	0.031024
ACTGTCCTCGGCTGTG-1_1	NX1	Nx	08d	18001	4413	3.433	20.521	0.011	0.560466	-0.554651	S	4	0.0455568	0.151645	-0.000263864	2.16389
ACTGTGATCCAGCTCT-1_1	NX1	Nx	08d	9785	3141	5.835	24.251	0.02	-0.58634	-0.0839548	G1	2	0.0971621	0.0404786	-0.744323	-3.08619
ACTGTGATCCGACGGT-1_1	NX1	Nx	08d	15533	4146	3.747	22.848	0.032	0.0171532	1.10051	G2M	0	0.0544205	0.0404786	1.26232	1.70549
ACTGTGATCGACATAC-1_1	NX1	Nx	08d	28796	5592	5.16	20.694	0.059	0.967964	-0.223312	S	3	0.0239706	0.0404786	-2.35495	4.56006
ACTGTGATCGCAAGAG-1_1	NX1	Nx	08d	23632	4403	1.972	31.538	0.034	1.07295	0.480109	S	5	0.0236857	0.205118	-8.5154	-4.25765
ACTGTGATCTATCGCC-1_1	NX1	Nx	08d	25072	5326	4.475	20.948	0.024	0.60267	1.21216	G2M	0	0.477416	0.0404786	-1.50938	-0.352448
ACTTAGGAGAGTCCGA-1_1	NX1	Nx	08d	24921	4973	4.843	23.001	0.012	1.39266	-0.00505817	S	4	0.0455568	0.931585	0.32186	2.37262
ACTTAGGTCAAGAGGC-1_1	NX1	Nx	08d	15349	3996	5.922	25.63	0.039	-0.0284	-0.542292	G1	2	0.0971621	0.0404786	-2.8295	-2.88786
ACTTATCAGCGTGAGT-1_1	NX1	Nx	08d	28460	5175	5.857	18.918	0.011	-0.139736	-0.243994	G1	1	0.0320019	0.0404786	4.15068	5.2747
ACTTATCAGGGACACT-1_1	NX1	Nx	08d	12496	3790	5.458	19.222	0.032	-0.362827	-0.41243	G1	3	0.0239706	0.0404786	-4.77372	2.10406
ACTTATCGTAGTCACT-1_1	NX1	Nx	08d	15316	4297	5.027	20.005	0.02	0.108991	-0.608777	S	0	0.0544205	0.0404786	4.19004	-0.0337024
ACTTATCGTTTCCCAC-1_1	NX1	Nx	08d	5211	1683	0.499	33.679	0	0.278576	0.577047	G2M	1	0.441542	0.0404786	4.53456	4.07248
ACTTCGCAGCAAATCA-1_1	NX1	Nx	08d	76821	7141	1.872	20.375	0.026	-0.18559	-0.706113	G1	1	0.0320019	0.0404786	7.6689	4.4389
ACTTCGCAGTCCTGCG-1_1	NX1	Nx	08d	27878	5528	3.842	25.586	0.018	0.974971	0.607197	S	2	0.0971621	0.205118	-4.24627	0.519815
ACTTCGCCAAACCATC-1_1	NX1	Nx	08d	34297	6181	3.248	17.596	0.041	1.38532	-0.0552717	S	0	0.0544205	0.0404786	4.92915	1.07981
ACTTCGCGTACAAGCG-1_1	NX1	Nx	08d	15249	4077	6.63	21.746	0.046	-0.329858	-0.700096	G1	2	0.0971621	0.0404786	-1.58802	-3.56255
ACTTCGCTCTGTCCGT-1_1	NX1	Nx	08d	39368	6330	5.913	16.872	0.02	0.311123	1.33578	G2M	1	0.0320019	0.177399	3.19771	4.15765
ACTTTCAAGTTACGTC-1_1	NX1	Nx	08d	16771	3965	4.192	25.216	0.024	0.00529812	-0.565905	S	1	0.574241	0.0404786	2.35017	-2.01537
ACTTTCACAGGGTCTC-1_1	NX1	Nx	08d	19340	3217	2.678	35.388	0.005	-0.292011	-0.0708564	G1	7	0.0277228	0.233633	-8.04898	-6.44965
ACTTTCAGTCAGGCAA-1_1	NX1	Nx	08d	14049	3849	6.029	19.411	0.007	-0.183309	-0.306058	G1	4	0.0455568	0.0404786	0.109591	2.47496
ACTTTGTAGGGCTGAT-1_1	NX1	Nx	08d	11767	3265	6.034	24.798	0.017	-0.117481	-0.585159	G1	0	0.0544205	0.205118	0.477628	0.380598
ACTTTGTAGTGCCAGA-1_1	NX1	Nx	08d	16044	4021	5.784	26.789	0.006	0.845409	-0.139295	S	2	0.0971621	0.0404786	-1.53902	-3.58158
ACTTTGTGTTGGCCTG-1_1	NX1	Nx	08d	17062	3950	2.725	30.735	0	-0.0938986	-0.523998	G1	2	0.430188	0.0404786	-0.530496	0.394276
ACTTTGTTCGGTCAGC-1_1	NX1	Nx	08d	24363	5344	5.697	18.294	0.025	0.720015	0.739542	G2M	0	0.534811	0.0404786	0.129525	1.27223
AGAAATGCACTCTGCT-1_1	NX1	Nx	08d	25192	5139	1.52	27.068	0.008	-0.181435	-0.65738	G1	2	0.430188	0.443753	-1.75702	-0.314088
AGAAATGTCGAGTACT-1_1	NX1	Nx	08d	13316	3401	6.729	28.605	0.015	-0.156649	-0.348424	G1	0	0.247403	0.0404786	-0.824941	0.906646
AGAACAAAGTAGCTCT-1_1	NX1	Nx	08d	11356	3475	5.574	24.727	0.026	-0.301051	1.46627	G2M	3	0.0239706	0.0404786	-3.97192	1.71242
AGAACAACACAACGAG-1_1	NX1	Nx	08d	18963	4398	4.646	25.017	0.016	0.71374	-0.549938	S	0	0.0544205	0.0404786	3.87678	-0.883812
AGAACAACACAAGCAG-1_1	NX1	Nx	08d	42460	5933	3.245	18.085	0.033	0.598399	-0.54329	S	1	0.0320019	0.0646147	7.10009	4.84343
AGAACCTAGGTAAGTT-1_1	NX1	Nx	08d	12187	3546	5.514	23.008	0.016	-0.411599	-0.586812	G1	2	0.0971621	0.177399	-2.95329	-2.75075
AGAACCTAGTTCTCTT-1_1	NX1	Nx	08d	22034	4460	4.103	21.694	0.027	-0.00339298	0.660646	G2M	1	0.0320019	0.0404786	4.15731	4.40628
AGAACCTCAAGACGGT-1_1	NX1	Nx	08d	34770	5791	4.326	25.775	0.023	-0.277937	-0.699886	G1	0	0.0544205	0.931585	1.51996	0.617358
AGAAGCGAGGATTCAA-1_1	NX1	Nx	08d	14901	3457	4.174	33.729	0.007	-0.138223	-0.558145	G1	3	0.0239706	0.0404786	-3.81757	3.21562
AGAAGCGTCCGGCAGT-1_1	NX1	Nx	08d	24929	5077	5.837	25.765	0.028	0.100624	-0.679989	S	0	0.0544205	0.0404786	1.07722	1.27418
AGAAGCGTCGCATTGA-1_1	NX1	Nx	08d	8548	2630	6.785	28.919	0.012	-0.152137	0.00879434	G2M	4	0.0455568	0.135375	0.545103	2.25045
AGAAGCGTCTTTGCGC-1_1	NX1	Nx	08d	37740	6004	5.241	20.392	0.019	0.671029	1.01974	G2M	0	0.0544205	0.0404786	4.77425	0.464829
AGAAGTATCACCACAA-1_1	NX1	Nx	08d	15358	3979	4.656	24.717	0.007	-0.27386	-0.603516	G1	2	0.0971621	0.233633	-0.275106	-4.18093
AGAAGTATCCACACAA-1_1	NX1	Nx	08d	19571	4546	4.931	22.125	0.02	0.697293	-0.242299	S	0	0.0544205	0.0404786	1.59992	1.78347
AGACAAACACCTGTCT-1_1	NX1	Nx	08d	25668	5326	4.695	22.004	0.008	0.0595533	2.017	G2M	4	0.0455568	0.205118	-2.05158	1.28058
AGACAAATCCTTGACC-1_1	NX1	Nx	08d	26685	5674	4.351	18.984	0.022	0.723916	1.20419	G2M	3	0.0239706	0.0404786	-3.22436	1.44944
AGACACTCAACGACAG-1_1	NX1	Nx	08d	14442	3706	3.608	28.528	0.021	-0.197246	-0.592833	G1	2	0.0971621	0.0404786	-2.3229	-3.10664
AGACAGGAGGCATCAG-1_1	NX1	Nx	08d	9807	2910	4.782	24.737	0.01	-0.405529	-0.171947	G1	0	0.0544205	0.443753	1.39906	1.62415
AGACAGGCAATAACGA-1_1	NX1	Nx	08d	26922	4778	4.056	18.932	0.03	-0.153886	-0.523548	G1	1	0.0320019	0.931585	3.25463	4.95038
AGACAGGCAATACGCT-1_1	NX1	Nx	08d	23361	5322	4.777	17.623	0.03	1.51723	0.158669	S	4	0.0455568	0.205118	-2.57294	0.801207
AGACAGGCACAATCTG-1_1	NX1	Nx	08d	26882	5487	6.078	21.624	0.004	0.76632	1.32216	G2M	0	0.0544205	0.0404786	3.12879	-0.952335
AGACAGGTCATACGGT-1_1	NX1	Nx	08d	17349	4358	5.395	18.82	0.029	0.382693	1.11016	G2M	4	0.0455568	0.0404786	-1.80001	1.50811
AGACCATAGGCCATAG-1_1	NX1	Nx	08d	17846	4151	2.768	31.077	0.022	0.413536	-0.336419	S	2	0.0971621	0.205118	-4.59743	-2.49862
AGACCATAGTAGGGTC-1_1	NX1	Nx	08d	25275	5263	5.389	19.6	0.024	0.955768	1.34878	G2M	2	0.0971621	0.205118	0.380418	-3.58955
AGACCATAGTTGAAGT-1_1	NX1	Nx	08d	26560	5213	5.215	23.637	0.023	-0.0291596	-0.766982	G1	1	0.0320019	0.0404786	1.04299	-3.28987
AGACCATGTCACGCTG-1_1	NX1	Nx	08d	17915	4453	3.6	21.881	0.011	0.736077	0.895343	G2M	0	0.477416	0.0404786	-1.86016	0.0275024
AGACCCGAGTAGATCA-1_1	NX1	Nx	08d	14232	3809	5.094	26.532	0.007	-0.379837	-0.580306	G1	2	0.0971621	0.0404786	-0.93557	-3.04565
AGACTCAGTCTTGCTC-1_1	NX1	Nx	08d	17927	4626	5.154	22.129	0.022	0.544422	1.72838	G2M	2	0.0971621	0.0404786	-2.87339	-2.42402
AGACTCAGTGAGTAAT-1_1	NX1	Nx	08d	20206	4583	5.147	24.513	0.01	0.639001	0.710426	G2M	0	0.0544205	0.0404786	-0.799375	3.73051
AGACTCATCGTCCTCA-1_1	NX1	Nx	08d	14143	4117	9.065	14.721	0.035	0.406834	-0.744415	S	4	0.0455568	0.135375	-1.53876	1.41289
AGAGAATCAGGCTTGC-1_1	NX1	Nx	08d	17973	4560	5.597	25.444	0	0.914198	0.083289	S	3	0.0239706	0.0404786	-4.46667	3.48876
AGAGAATCAGTGCGCT-1_1	NX1	Nx	08d	11252	3424	6.372	21.285	0.009	-0.0447391	1.47571	G2M	2	0.0971621	0.0646147	-2.47512	-0.362565
AGAGAATCATGGTGGA-1_1	NX1	Nx	08d	43094	6186	4.416	21.147	0.026	0.747675	0.682856	S	1	0.0320019	0.0404786	5.3505	4.10222
AGAGAATGTCACATTG-1_1	NX1	Nx	08d	33928	5908	3.033	23.562	0.024	0.22537	-0.658523	S	1	0.0320019	0.0404786	5.2059	5.2182
AGAGAATTCTGGACTA-1_1	NX1	Nx	08d	19386	4694	6.716	20.396	0.01	1.39011	-0.1302	S	0	0.0544205	0.0404786	-0.765603	0.53779
AGAGCAGAGTACCATC-1_1	NX1	Nx	08d	20045	4319	4.49	19.656	0.05	-0.201425	-0.643155	G1	1	0.0320019	0.0404786	3.41584	3.29939
AGAGCAGAGTCAGCCC-1_1	NX1	Nx	08d	22945	4585	5.474	25.352	0.009	1.07758	0.547531	S	0	0.0544205	0.0404786	4.07396	0.501947
AGAGCAGAGTTGCCTA-1_1	NX1	Nx	08d	13210	3629	5.064	22.687	0	0.388138	1.76048	G2M	2	0.0971621	0.0404786	-2.20089	-0.148575
AGAGCAGCAACCGATT-1_1	NX1	Nx	08d	18835	4768	4.035	23.578	0.016	0.943953	-0.435672	S	0	0.0544205	0.0404786	3.51735	-1.8524
AGAGCAGCAACTTGCA-1_1	NX1	Nx	08d	19308	4676	5.868	23.835	0.031	0.139532	-0.516701	S	3	0.0239706	0.0404786	-4.31017	1.04061
AGAGCAGCAAGTTCGT-1_1	NX1	Nx	08d	22144	4913	3.22	27.29	0.014	0.852624	1.07991	G2M	5	0.0236857	0.0404786	-9.18841	-4.18051
AGAGCAGCACCTGCGA-1_1	NX1	Nx	08d	35596	4945	2.896	27.045	0.011	0.163682	-0.359387	S	1	0.0320019	0.0404786	5.25263	4.51627
AGAGCCCCAGATCACT-1_1	NX1	Nx	08d	28772	5132	3.403	23.7	0.021	-0.0352084	-0.291976	G1	1	0.0320019	0.0404786	6.21625	3.51147
AGATAGAAGATACCAA-1_1	NX1	Nx	08d	47420	6498	3.688	27.874	0.023	0.584541	1.47101	G2M	5	0.0236857	0.0404786	-11.1256	-4.67019
AGATAGACAGCCGTCA-1_1	NX1	Nx	08d	15366	3972	4.477	22.888	0.033	-0.153872	-0.588144	G1	0	0.0544205	0.0404786	-2.56879	2.05514
AGATAGACATCAGTCA-1_1	NX1	Nx	08d	24540	5220	1.968	25.069	0.024	0.333515	2.20844	G2M	2	0.0971621	0.205118	-4.96811	-1.88006
AGATAGAGTAGACGGT-1_1	NX1	Nx	08d	11371	3234	5.787	25.134	0	-0.189549	0.557877	G2M	2	0.0971621	0.0404786	-1.94932	2.41877
AGATAGATCATCAGTG-1_1	NX1	Nx	08d	16615	4076	4.129	25.441	0.018	-0.154038	0.206591	G2M	0	0.0544205	0.443753	4.28309	-1.98402
AGATCCAAGACTGTTC-1_1	NX1	Nx	08d	14507	3975	5.68	21.948	0.028	0.00968225	1.22017	G2M	2	0.0971621	0.0404786	-0.109016	-3.89277
AGATCCAAGCACGTCC-1_1	NX1	Nx	08d	51441	6278	2.16	24.766	0.021	1.48167	0.874634	S	6	0	0.0404786	0.654458	-13.3966
AGATCCACACTGGATT-1_1	NX1	Nx	08d	24542	5025	4.119	25.654	0.029	1.17611	-0.00899059	S	4	0.0455568	0.0404786	0.809338	2.27242
AGATCCATCATCTATC-1_1	NX1	Nx	08d	20348	4721	3.976	19.874	0.034	0.551814	1.2084	G2M	0	0.0544205	0.0404786	2.2042	-0.037676
AGATCCATCCCTAGGG-1_1	NX1	Nx	08d	22800	5275	1.066	23.513	0.035	0.127952	2.01944	G2M	2	0.0971621	0.443753	-4.01496	-0.855076
AGATCGTAGGTCCCGT-1_1	NX1	Nx	08d	22707	4729	2.356	23.147	0.022	0.107368	-0.198007	S	1	0.0320019	0.0404786	6.40133	4.97916
AGATCGTCACCCTGAG-1_1	NX1	Nx	08d	23699	4743	4.435	25.562	0.021	0.174508	1.88442	G2M	4	0.0455568	0.0404786	0.153681	2.37788
AGATCGTCATTGCCTC-1_1	NX1	Nx	08d	12830	3604	5.924	22.814	0.023	-0.129333	-0.52604	G1	0	0.0544205	0.0404786	-1.25724	2.92539
AGATGAAAGATGCTAA-1_1	NX1	Nx	08d	11844	3119	6.391	29.255	0.008	0.000645473	-0.634818	S	3	0.0239706	0.233633	-4.20641	2.53134
AGATGAAGTATTGAGA-1_1	NX1	Nx	08d	23933	4902	5.44	19.688	0.021	0.0591829	-0.569418	S	1	0.0320019	0.233633	3.31959	3.41944
AGATGCTAGACCCGCT-1_1	NX1	Nx	08d	22130	4881	4.37	24.785	0.023	0.235174	-0.457867	S	5	0.0236857	0.0646147	-12.3455	-4.55645
AGATGCTAGCAATAAC-1_1	NX1	Nx	08d	22793	4967	4.655	20.541	0.004	1.01281	1.16661	G2M	4	0.397687	0.0404786	-2.79205	0.245838
AGATGCTAGTCTACCA-1_1	NX1	Nx	08d	13004	3366	4.06	28.437	0.038	-0.156547	-0.785996	G1	4	0.0455568	0.0404786	-0.282366	1.99035
AGATGCTCACAAAGTA-1_1	NX1	Nx	08d	17848	4190	8.275	27.566	0.017	0.602725	-0.254715	S	10	0	0.205118	14.0752	-1.89933
AGATGCTTCACTTTGT-1_1	NX1	Nx	08d	16001	4390	3.925	20.067	0.069	0.228747	-0.482664	S	0	0.0544205	0.0404786	2.83595	-0.615333
AGCATCACAACTCGTA-1_1	NX1	Nx	08d	23006	4967	4.103	21.633	0.048	0.933663	0.899187	S	0	0.477416	0.0404786	-1.59185	0.295924
AGCATCACATCGATCA-1_1	NX1	Nx	08d	17713	4416	3.111	25.078	0.023	-0.0880838	-0.0583494	G1	3	0.0239706	0.0404786	-4.1606	3.19442
AGCATCATCTCCTACG-1_1	NX1	Nx	08d	12295	3471	6.076	26.816	0.041	-0.00852365	-0.636207	G1	2	0.0971621	0.931585	-4.37605	-2.47074
AGCCAATAGACCACGA-1_1	NX1	Nx	08d	60250	7343	5.029	21.545	0.033	0.488125	-0.376966	S	1	0.0320019	0.0404786	5.80087	5.36927
AGCCAATAGTCACACT-1_1	NX1	Nx	08d	30744	5627	3.539	22.957	0.033	1.25002	0.488779	S	4	0.0455568	0.135375	-1.12081	1.90599
AGCCAATCAAGTATAG-1_1	NX1	Nx	08d	21442	4556	3.801	28.873	0.023	0.263168	-0.505609	S	5	0.0236857	0.0404786	-11.8571	-4.5392
AGCCAATCATCGCTGG-1_1	NX1	Nx	08d	25726	5253	6.278	20.761	0.016	-0.0436648	-0.774093	G1	0	0.0544205	0.0404786	0.544272	-0.757231
AGCCAATGTACGCTAT-1_1	NX1	Nx	08d	6788	1626	5.893	28.86	0	0.0995092	0.996673	G2M	9	0	0.0404786	-7.43169	-9.7203
AGCCAATGTTTCCAAG-1_1	NX1	Nx	08d	94409	8286	5.832	25.985	0.012	0.548912	0.802867	G2M	10	0	0.0404786	14.0431	-1.93178
AGCCAATTCGGACCAC-1_1	NX1	Nx	08d	7877	1880	2.323	12.225	0	-0.253647	-0.172239	G1	9	0	0.0404786	-7.61803	-8.62735
AGCCACGGTCAATGGG-1_1	NX1	Nx	08d	19172	4594	2.884	24.311	0.021	1.12974	-0.357431	S	2	0.430188	0.0404786	-1.47263	0.632535
AGCCACGTCGCAACAT-1_1	NX1	Nx	08d	8308	2500	1.324	5.826	0	-0.474667	-0.35636	G1	9	0	0.0404786	-7.58397	-9.08121
AGCCAGCAGCAAATCA-1_1	NX1	Nx	08d	14576	3904	4.802	22.894	0.014	0.225145	-0.503499	S	5	0.0236857	0.0404786	-11.9222	-4.33924
AGCCAGCCAATCGCGC-1_1	NX1	Nx	08d	48933	6553	3.799	28.369	0.008	1.38832	1.09829	S	5	0.0236857	0.177399	-8.4695	-4.26688
AGCGATTAGAGCGACT-1_1	NX1	Nx	08d	23363	4407	3.137	25.656	0.017	0.115451	-0.477192	S	1	0.0320019	0.0404786	4.68089	4.43922
AGCGATTAGGTCCCGT-1_1	NX1	Nx	08d	18875	4142	5.441	29.049	0.021	-0.184303	-0.470491	G1	5	0.0236857	0.181218	-12.4077	-4.60925
AGCGATTCAAGTCCCG-1_1	NX1	Nx	08d	38845	6648	5.836	17.93	0.033	0.834167	1.0822	G2M	1	0.0320019	0.0404786	1.26382	-1.96504
AGCGATTGTACGTGAG-1_1	NX1	Nx	08d	19419	4168	3.352	30.877	0.01	0.229859	-0.463016	S	2	0.0971621	0.205118	-4.72465	-2.38245
AGCGCCAAGTCGTCTA-1_1	NX1	Nx	08d	15880	3829	4.736	25.031	0.006	0.237665	-0.248294	S	4	0.0455568	0.250573	-1.89096	1.63394
AGCGCCACAAGATTGA-1_1	NX1	Nx	08d	4491	1712	0.223	31.107	0	0.0475992	-0.343635	S	3	0.708579	0.0404786	-2.67424	3.12637
AGCGCCACAATCGCAT-1_1	NX1	Nx	08d	23224	5101	4.646	20.664	0.03	0.707882	1.03289	G2M	3	0.0239706	0.0404786	-2.15353	3.80899
AGCGCCACAGTGCGCT-1_1	NX1	Nx	08d	20574	4702	3.568	23.948	0.019	0.706726	-0.383588	S	3	0.0239706	0.0404786	-3.55082	3.57563
AGCGCTGAGCAACTCT-1_1	NX1	Nx	08d	15409	4080	6.237	23.24	0	-0.330987	0.359863	G2M	2	0.0971621	0.0551106	-2.88663	-1.47898
AGCGCTGGTCCGGCAT-1_1	NX1	Nx	08d	14137	3748	5.701	23.223	0.014	-0.0334173	-0.431684	G1	4	0.0455568	0.0404786	-2.21326	1.09616
AGCGCTGGTGCCGTTG-1_1	NX1	Nx	08d	24961	5049	6.35	23.733	0.02	-0.399062	-0.655445	G1	3	0.0239706	0.0404786	-3.75202	3.19726
AGCGCTGTCATCACCC-1_1	NX1	Nx	08d	13875	3557	5.29	23.906	0.022	-0.199956	1.20863	G2M	2	0.0971621	0.0646147	1.26736	-3.56823
AGCGCTGTCGGCTGTG-1_1	NX1	Nx	08d	11516	3554	5.879	24.314	0.009	0.251646	1.34679	G2M	3	0.0239706	0.0404786	-2.77833	3.68465
AGCGTATAGCGTTACT-1_1	NX1	Nx	08d	16523	3722	5.405	25.583	0.018	-0.298311	-0.527101	G1	8	0	0.0404786	5.72474	-9.56041
AGCGTATCACTGCTTC-1_1	NX1	Nx	08d	12773	3185	3.1	31.214	0.039	-0.207388	-0.511991	G1	3	0.0239706	0.0404786	-2.72845	4.19655
AGCGTATGTCCATACA-1_1	NX1	Nx	08d	24763	4683	3.433	23.947	0.012	-0.233747	-0.691468	G1	1	0.0320019	0.0404786	4.96561	4.95646
AGCGTCGGTACGTAGG-1_1	NX1	Nx	08d	4469	1696	6.198	31.237	0	-0.187823	0.259062	G2M	3	0.0239706	0.0404786	-3.05334	3.27764
AGCGTCGGTCCTTTGC-1_1	NX1	Nx	08d	12368	3479	5.474	20.06	0.032	0.673281	-0.59643	S	1	0.0320019	0.0404786	4.05714	5.34572
AGCTACACACCTTCCA-1_1	NX1	Nx	08d	18009	4426	1.794	25.254	0.056	-0.291947	-0.660557	G1	0	0.0544205	0.0404786	1.57957	-1.21084
AGCTTCCAGAAGGCTC-1_1	NX1	Nx	08d	28369	5064	4.519	24.072	0.025	0.703189	-0.285808	S	1	0.498708	0.0404786	0.633018	5.26968
AGGAAATAGTAGAATC-1_1	NX1	Nx	08d	44923	7033	5.142	21.165	0.04	0.141151	-0.616343	S	0	0.0544205	0.0404786	3.67017	-2.07736
AGGAAATCACTCTCGT-1_1	NX1	Nx	08d	23621	5173	6.566	22.112	0.013	1.3034	0.152355	S	0	0.0544205	0.0404786	2.91746	-0.95521
AGGAAATGTAGTGCGA-1_1	NX1	Nx	08d	19473	4725	4.565	20.926	0.021	0.690218	1.355	G2M	0	0.0544205	0.443753	0.0675673	0.672878
AGGAATAAGCGAGTAC-1_1	NX1	Nx	08d	17336	4220	3.974	23.627	0.017	-0.0810933	-0.536622	G1	0	0.0544205	0.0404786	2.75323	0.447579
AGGACGAAGCACTAAA-1_1	NX1	Nx	08d	19723	4323	4.487	26.254	0.02	1.5829	-0.106313	S	0	0.0544205	0.0404786	4.07075	1.01586
AGGACGAAGGAAAGTG-1_1	NX1	Nx	08d	44467	6685	5.568	21.789	0.025	0.583053	1.16026	G2M	0	0.0544205	0.181218	4.4567	-0.0849642
AGGACGACAAGCTACT-1_1	NX1	Nx	08d	19761	4324	6.482	29.508	0.015	-0.0693868	-0.440809	G1	5	0.0236857	0.0404786	-12.3965	-4.68919
AGGACTTAGACATCCT-1_1	NX1	Nx	08d	25046	5418	4.651	25.501	0.016	0.187585	1.99347	G2M	5	0.0236857	0.0551106	-8.89426	-4.14408
AGGACTTAGAGCTGCA-1_1	NX1	Nx	08d	42474	6647	4.624	22.437	0.016	0.710781	0.877715	G2M	0	0.0544205	0.0404786	-2.36497	0.81187
AGGACTTCACACGGAA-1_1	NX1	Nx	08d	47416	6706	5.631	24.032	0.013	0.401052	1.64661	G2M	0	0.0544205	0.0404786	3.64569	-0.824401
AGGAGGTAGAAGCTGC-1_1	NX1	Nx	08d	16370	4133	5.174	20.806	0.049	0.133429	1.74705	G2M	2	0.0971621	0.0404786	-0.835241	-2.77442
AGGAGGTCAGGTAGTG-1_1	NX1	Nx	08d	15882	3838	3.589	25.765	0.019	-0.423296	-0.66046	G1	5	0.0236857	0.0404786	-11.9287	-4.49965
AGGAGGTCATATTCGG-1_1	NX1	Nx	08d	14418	4049	2.622	18.116	0.035	0.0180152	-0.424175	S	0	0.0544205	0.0404786	-0.0602131	0.205548
AGGAGGTCATCCGTTC-1_1	NX1	Nx	08d	15760	4311	5.971	17.678	0.013	0.459514	0.616019	G2M	0	0.0544205	0.443753	-0.72209	3.11651
AGGAGGTCATTGTCGA-1_1	NX1	Nx	08d	16845	4111	6.245	24.405	0.012	-0.0187462	0.773986	G2M	0	0.0544205	0.0404786	-1.01159	2.89139
AGGAGGTGTGAGTCAG-1_1	NX1	Nx	08d	26063	5741	5.671	21.602	0.008	0.416325	2.05577	G2M	5	0.0236857	0.0404786	-12.2535	-4.70228
AGGAGGTTCACCGCTT-1_1	NX1	Nx	08d	45041	6767	4.654	20.555	0.024	0.909717	1.01248	G2M	0	0.0544205	0.0404786	2.94752	-0.835913
AGGATAAGTCCGTACG-1_1	NX1	Nx	08d	13742	3756	3.857	24.836	0.058	1.28092	0.261263	S	0	0.0544205	0.54438	-1.60801	0.441133
AGGATAATCCATGATG-1_1	NX1	Nx	08d	35545	6142	4.6	20.068	0.023	0.368432	1.16502	G2M	0	0.0544205	0.0404786	4.35752	-0.386019
AGGCATTAGGGCAACT-1_1	NX1	Nx	08d	77947	8180	3.871	20.958	0.031	0.553197	1.07208	G2M	0	0.0544205	0.0404786	4.87539	0.813222
AGGCATTCAAGACGAC-1_1	NX1	Nx	08d	11820	3285	4.408	29.086	0.034	-0.101913	-0.417844	G1	3	0.0239706	0.0404786	-3.98739	2.07504
AGGCATTCATCTGGGC-1_1	NX1	Nx	08d	18313	4461	4.789	23.218	0.033	-0.244821	-0.483578	G1	4	0.0455568	0.0404786	-0.362106	1.36111
AGGCATTGTCCTCCTA-1_1	NX1	Nx	08d	30979	5670	4.664	18.593	0.01	0.62864	1.19296	G2M	4	0.0455568	0.0404786	-1.30527	1.36276
AGGCCACAGTGCCTCG-1_1	NX1	Nx	08d	12495	2222	1.825	35.054	0	-0.13094	-0.117691	G1	7	0.0277228	0.443753	-7.50873	-7.06843
AGGCCACCAAGACCGA-1_1	NX1	Nx	08d	31680	5718	5.101	25.707	0.028	-0.00935464	-0.662349	G1	2	0.0971621	0.0404786	-1.46851	-2.82096
AGGCCACTCATTGTGG-1_1	NX1	Nx	08d	16193	4033	5.916	22.806	0.025	-0.0624379	-0.668525	G1	2	0.0971621	0.100565	-2.97016	-2.80764
AGGCCACTCGTCGCTT-1_1	NX1	Nx	08d	24059	4660	4.867	22.935	0.004	0.0373811	-0.555677	S	1	0.0320019	0.177399	4.28821	4.93127
AGGCTGCGTCTGTTAG-1_1	NX1	Nx	08d	20503	4419	6.175	22.836	0.034	-0.195956	-0.56316	G1	1	0.0320019	0.0404786	4.84949	4.50684
AGGCTGCTCTAGCAAC-1_1	NX1	Nx	08d	15746	3970	6.427	25.949	0.025	-0.333954	-0.560828	G1	0	0.0544205	0.0646147	3.74195	-0.937484
AGGGAGTAGCTAAACA-1_1	NX1	Nx	08d	12406	3507	5.481	24.843	0.016	-0.118115	-0.493487	G1	2	0.0971621	0.0404786	-3.31237	-0.568084
AGGGCCTCACAGTCGC-1_1	NX1	Nx	08d	41478	6293	4.771	18.516	0.012	0.52611	0.627748	G2M	1	0.0320019	0.0404786	3.32619	4.49816
AGGGCCTTCCAACTAG-1_1	NX1	Nx	08d	22029	5105	6.787	18.725	0.014	0.0677506	2.02044	G2M	2	0.0971621	0.0404786	-1.53654	-3.64571
AGGGCCTTCTCCTGTG-1_1	NX1	Nx	08d	15111	3858	4.553	24.287	0.007	-0.229375	-0.316396	G1	0	0.0544205	0.0404786	-1.43433	2.90272
AGGGCTCAGACTCAAA-1_1	NX1	Nx	08d	4673	1574	0.021	35.93	0.021	0.692552	1.26966	G2M	5	0.742857	0.0404786	-9.99138	-3.4738
AGGGCTCAGCGCCCAT-1_1	NX1	Nx	08d	29296	5635	4.683	21.368	0.024	1.11797	0.194469	S	1	0.0320019	0.135375	4.96035	2.78523
AGGGCTCGTTCGGTAT-1_1	NX1	Nx	08d	10580	3175	8.233	25.747	0.019	-0.125148	-0.498218	G1	2	0.0971621	0.0404786	-1.0312	-3.75299
AGGGTCCTCTCCCTAG-1_1	NX1	Nx	08d	16101	4245	5.757	22.52	0.019	0.489834	0.52491	G2M	0	0.0544205	0.931585	2.00931	0.129567
AGGGTCCTCTCGAGTA-1_1	NX1	Nx	08d	22792	4852	4.888	22.144	0.018	0.599522	1.07693	G2M	1	0.0320019	0.177399	6.26676	3.44501
AGGGTGAAGAGAGGTA-1_1	NX1	Nx	08d	12686	3451	3.082	27.794	0	-0.0935908	-0.416135	G1	2	0.0971621	0.0404786	-4.76329	-1.13208
AGGGTGACATCACCAA-1_1	NX1	Nx	08d	16841	4107	5.006	24.423	0.018	0.334888	-0.379936	S	0	0.0544205	0.0404786	4.59885	-1.19313
AGGGTTTAGTCCTGCG-1_1	NX1	Nx	08d	31559	5328	6.445	23.575	0.051	-0.231135	-0.534561	G1	1	0.0320019	0.0404786	6.70743	5.1834
AGGGTTTCAGACTGCC-1_1	NX1	Nx	08d	18607	4089	4.681	31.751	0.011	0.383933	-0.408568	S	2	0.0971621	0.135375	-4.85786	-1.04127
AGGGTTTGTACAAGTA-1_1	NX1	Nx	08d	12110	3203	5.442	28.58	0.025	-0.179418	-0.382133	G1	4	0.0455568	0.0404786	-1.38698	1.65041
AGGGTTTGTACCTGTA-1_1	NX1	Nx	08d	16022	3819	5.13	24.61	0.031	0.27545	-0.420937	S	0	0.0544205	0.0404786	0.00567174	-1.13289
AGGTAGGGTAGCTTAC-1_1	NX1	Nx	08d	20045	4056	4.829	34.637	0.005	0.749008	-0.187168	S	5	0.0236857	0.0404786	-11.4401	-4.13417
AGGTAGGGTGCCAAGA-1_1	NX1	Nx	08d	34992	5640	5.59	21.445	0.031	-0.375627	-0.591509	G1	1	0.0320019	0.0404786	5.07383	5.36964
AGGTAGGTCAGCTCTC-1_1	NX1	Nx	08d	22190	4655	4.899	24.547	0.005	1.13778	-0.0727137	S	3	0.0239706	0.0404786	-2.42662	3.43157
AGGTCATCATGACGGA-1_1	NX1	Nx	08d	18740	4469	5.502	24.861	0.037	0.289824	1.8941	G2M	2	0.0971621	0.0404786	-1.13288	-3.55824
AGGTCATGTCCATACA-1_1	NX1	Nx	08d	12888	4413	2.32	11.274	0.054	1.68377	-0.0264644	S	1	0.0320019	0.205118	0.643133	-2.4423
AGGTCATGTGAATAAC-1_1	NX1	Nx	08d	28243	5377	4.065	18.015	0.011	0.329374	-0.592338	S	1	0.0320019	0.0404786	2.91148	4.32761
AGGTCTATCATGGCCG-1_1	NX1	Nx	08d	12058	3494	3.392	26.986	0.017	0.0412665	-0.409536	S	3	0.0239706	0.0404786	-3.88884	2.26584
AGGTGTTAGTAGAGTT-1_1	NX1	Nx	08d	17775	4333	5.429	22.031	0.051	1.73692	0.0852249	S	2	0.0971621	0.0404786	-4.49557	-1.21188
AGGTGTTTCCTGTTAT-1_1	NX1	Nx	08d	15633	4033	4.35	20.809	0.006	0.0424576	-0.345689	S	1	0.0320019	0.0404786	1.35887	-1.90858
AGGTGTTTCGAGTGGA-1_1	NX1	Nx	08d	18276	4283	7.13	25.005	0.016	0.582801	-0.47246	S	4	0.0455568	0.0404786	-2.80263	0.649228
AGGTGTTTCTCGTTTA-1_1	NX1	Nx	08d	32591	5247	2.697	29.674	0.021	1.30605	0.584681	S	5	0.0236857	0.181218	-8.50956	-4.33534
AGGTGTTTCTCTCAAT-1_1	NX1	Nx	08d	17917	4260	6.915	20.974	0.011	-0.271151	-0.623053	G1	1	0.0320019	0.0404786	6.01326	5.42566
AGGTTACAGCCGAACA-1_1	NX1	Nx	08d	13601	3855	4.294	21.013	0.007	-0.00890497	0.596481	G2M	2	0.0971621	0.205118	-2.44896	0.211426
AGGTTACAGTCAAGCG-1_1	NX1	Nx	08d	14354	3898	4.675	27.01	0.007	1.16719	0.695549	S	3	0.0239706	0.0404786	-3.82234	1.31328
AGGTTACCAAAGCAAT-1_1	NX1	Nx	08d	17334	4221	3.94	27.83	0.017	0.796918	0.920241	G2M	0	0.0544205	0.303249	1.6847	-1.75735
AGGTTGTAGTCACTCA-1_1	NX1	Nx	08d	13019	3623	5.154	24.226	0.008	0.287494	-0.59447	S	2	0.553806	0.0404786	-2.00811	-1.70026
AGGTTGTCAAGTACCT-1_1	NX1	Nx	08d	13532	3682	6.23	24.143	0.022	-0.149328	-0.569606	G1	2	0.0971621	0.0404786	-1.08066	-3.07385
AGGTTGTCACGCTATA-1_1	NX1	Nx	08d	25652	5068	7.138	25.748	0.019	-0.212976	-0.476115	G1	0	0.0544205	0.0404786	4.12893	-0.473717
AGGTTGTCATAACAGA-1_1	NX1	Nx	08d	24080	5229	6.15	20.785	0.012	0.687104	-0.679359	S	2	0.0971621	0.0404786	-3.31513	-1.08272
AGTAACCAGACGCATG-1_1	NX1	Nx	08d	16403	3888	6.352	21.965	0.012	0.18467	0.25573	G2M	4	0.0455568	0.205118	-1.81306	1.78153
AGTAACCAGTACTGGG-1_1	NX1	Nx	08d	18065	4407	3.637	21.755	0.022	-0.417256	-0.665193	G1	2	0.0971621	0.0404786	-4.27905	-2.22226
AGTAACCAGTATGACA-1_1	NX1	Nx	08d	40031	5132	3.597	37.588	0.015	0.417797	1.75779	G2M	7	0.0277228	0.181218	-7.43124	-7.18842
AGTAACCGTAGCTTGT-1_1	NX1	Nx	08d	40573	6394	6.302	17.236	0.015	0.261409	1.57831	G2M	4	0.0455568	0.0404786	-1.52239	1.25692
AGTACCACAACCTATG-1_1	NX1	Nx	08d	44681	7146	3.543	22.103	0.038	0.287046	1.21785	G2M	5	0.0236857	0.181218	-10.9754	-4.71873
AGTACCATCATTACGG-1_1	NX1	Nx	08d	14270	3920	5.851	19.902	0.035	-0.0259899	-0.475515	G1	0	0.0544205	0.0404786	-0.531872	0.332501
AGTACTGCAAATGAAC-1_1	NX1	Nx	08d	14655	3887	5.554	26.871	0.02	0.0233426	-0.438717	S	2	0.0971621	0.443753	-2.02485	-3.96277
AGTACTGCATAGATCC-1_1	NX1	Nx	08d	29173	5381	4.85	21.78	0.017	0.412137	1.13459	G2M	1	0.0320019	0.0404786	3.05926	3.2974
AGTACTGGTATTGAGA-1_1	NX1	Nx	08d	22738	4423	5.453	21.114	0.009	-0.126334	-0.253799	G1	1	0.0320019	0.0404786	3.93555	4.43973
AGTAGCTAGCGAGTAC-1_1	NX1	Nx	08d	14522	4012	6.108	23.385	0.048	0.0129749	-0.606835	S	0	0.0544205	0.0404786	0.167389	-0.631142
AGTAGCTCAACGCCCA-1_1	NX1	Nx	08d	20054	4653	5.854	19.462	0.04	0.44544	0.276417	S	3	0.0239706	0.0404786	-1.06755	4.74405
AGTAGCTGTCAGACTT-1_1	NX1	Nx	08d	25247	5278	5.49	22.042	0.02	1.0424	0.311622	S	0	0.0544205	0.0551106	4.45386	-0.412547
AGTAGCTTCACGATAC-1_1	NX1	Nx	08d	38002	6545	5.821	19.967	0.024	0.781821	0.774803	S	2	0.0971621	0.0404786	-3.20105	-0.658385
AGTAGTCGTTAAGGAT-1_1	NX1	Nx	08d	11387	3371	4.821	25.661	0.018	-0.160577	-0.565183	G1	2	0.0971621	0.233633	-3.98744	0.400313
AGTAGTCTCTCTAAGG-1_1	NX1	Nx	08d	14711	3747	3.467	25.158	0.014	-0.352594	-0.565424	G1	5	0.0236857	0.0404786	-12.3763	-4.62702
AGTCAACGTGTTTGCA-1_1	NX1	Nx	08d	29557	6012	5.346	16.737	0.03	0.0665293	1.82579	G2M	2	0.5857	0.0404786	-2.67671	-0.0623705
AGTCACACAACTAGAA-1_1	NX1	Nx	08d	17350	4348	5.331	20.686	0.012	-0.362854	-0.479336	G1	0	0.0544205	0.0404786	-0.883016	2.591
AGTCACACAGTCAGTT-1_1	NX1	Nx	08d	21267	4847	6.244	21.503	0.019	1.1611	0.299939	S	0	0.0544205	0.177399	4.28493	-1.30447
AGTCACAGTAGCTCGC-1_1	NX1	Nx	08d	20735	4174	4.832	24.852	0.014	0.358035	1.05565	G2M	0	0.0544205	0.110069	0.369784	2.33973
AGTCATGCAATGCAAA-1_1	NX1	Nx	08d	15180	4270	4.717	19.506	0.007	0.160245	1.57284	G2M	4	0.0455568	0.0404786	-1.98914	1.40395
AGTCATGGTGTAGGAC-1_1	NX1	Nx	08d	32183	5622	4.711	19.408	0.022	0.0381497	-0.648504	S	1	0.0320019	0.0404786	4.69416	5.09498
AGTCTCCAGGGCAGTT-1_1	NX1	Nx	08d	24686	4980	5.505	20.757	0.016	0.148545	-0.646233	S	1	0.0320019	0.0404786	3.37917	4.87384
AGTCTCCGTCCGGCAT-1_1	NX1	Nx	08d	21285	4604	3.693	22.138	0	-0.128166	-0.671754	G1	2	0.0971621	0.0404786	0.0668515	-3.50971
AGTCTCCTCAGGTGTT-1_1	NX1	Nx	08d	17150	4613	1.767	20.694	0.029	1.15081	1.02402	S	2	0.0971621	0.250573	-4.56385	-1.56936
AGTCTCCTCGATGCTA-1_1	NX1	Nx	08d	29017	5816	6.524	20.033	0.024	0.472321	0.651407	G2M	0	0.0544205	0.0404786	-0.627408	-1.84878
AGTGACTCACCTGAAT-1_1	NX1	Nx	08d	18806	4414	6.317	19.446	0.005	0.323798	0.699641	G2M	0	0.0544205	0.180829	4.90844	-1.30794
AGTGACTCATAATGCC-1_1	NX1	Nx	08d	16074	3780	1.897	32.736	0.006	0.269116	-0.295842	S	5	0.0236857	0.205118	-10.7657	-4.65812
AGTGACTGTAGTACGG-1_1	NX1	Nx	08d	36374	5939	4.927	24.685	0.011	0.401645	1.35968	G2M	0	0.0544205	0.0404786	4.58356	0.124183
AGTGACTGTCATGGCC-1_1	NX1	Nx	08d	16537	4082	5.721	24.013	0.018	0.0174046	-0.720316	S	0	0.40363	0.0404786	-1.37961	-0.587133
AGTGACTGTCGATGCC-1_1	NX1	Nx	08d	16572	3679	6.348	25.453	0.012	-0.15691	-0.0018749	G1	4	0.0455568	0.0646147	-1.89188	1.56601
AGTGATCAGTTTAGGA-1_1	NX1	Nx	08d	11336	3395	4.261	25.194	0.009	0.0189262	-0.475507	S	2	0.0971621	0.135375	-3.04106	-3.11141
AGTGATCCAAGCTGCC-1_1	NX1	Nx	08d	15528	4273	4.238	21.052	0.006	-0.408096	-0.650815	G1	2	0.0971621	0.0404786	-2.41084	-0.840104
AGTGATCTCGGCCCAA-1_1	NX1	Nx	08d	19787	4568	2.143	28.155	0.01	1.33943	0.82619	S	2	0.0971621	0.205118	-4.03597	-1.51499
AGTGATCTCGTCTACC-1_1	NX1	Nx	08d	19130	4657	6.231	20.204	0.026	0.00846771	-0.723433	S	3	0.0239706	0.0404786	-4.4076	1.34446
AGTGCCGGTATCAGGG-1_1	NX1	Nx	08d	14220	3699	6.111	25.485	0.021	-0.28142	-0.356571	G1	2	0.0971621	0.0646147	-1.46395	-2.78251
AGTGCCGGTATGGAAT-1_1	NX1	Nx	08d	17145	4304	4.899	23.325	0.017	1.13024	-0.121312	S	3	0.0239706	0.0404786	-3.32422	3.07865
AGTGCCGTCATCTACT-1_1	NX1	Nx	08d	11548	3427	6.278	20.436	0.035	0.0803157	0.48069	G2M	0	0.0544205	0.0404786	-1.34477	3.07002
AGTGCCGTCGGCTTCT-1_1	NX1	Nx	08d	12735	3644	6.172	18.414	0.016	-0.00902467	0.101046	G2M	4	0.0455568	0.205118	-1.25834	2.07247
AGTTAGCAGCTGTTAC-1_1	NX1	Nx	08d	22580	4703	4.712	20.545	0.018	-0.00859545	0.435313	G2M	1	0.0320019	0.0404786	5.59164	2.84407
AGTTAGCAGGGTGAGG-1_1	NX1	Nx	08d	33363	5508	4.841	24.356	0.018	0.378737	0.989104	G2M	1	0.0320019	0.0646147	3.59829	5.34701
AGTTCCCAGCGTTGTT-1_1	NX1	Nx	08d	25904	4976	4.513	24.409	0.019	0.17392	1.08727	G2M	0	0.0544205	0.0404786	4.84389	-0.150998
AGTTCCCTCGGAACTT-1_1	NX1	Nx	08d	28938	5879	7.544	22.493	0.031	0.58367	0.815697	G2M	0	0.0544205	0.0404786	0.222778	-0.361895
AGTTCGAAGCTCTTCC-1_1	NX1	Nx	08d	25476	5539	3.835	22.896	0.035	-0.183904	-0.755369	G1	5	0.0236857	0.181218	-11.6642	-4.49423
AGTTCGATCAATCTTC-1_1	NX1	Nx	08d	20749	4833	6.357	21.09	0.014	0.0799262	-0.43253	S	0	0.0544205	0.0646147	4.67762	-0.912413
AGTTCGATCCATCTGC-1_1	NX1	Nx	08d	13104	3861	6.426	20.597	0.031	-0.132912	-0.369631	G1	2	0.0971621	0.0404786	-2.71494	-2.74891
ATACCGAAGAGAGAAC-1_1	NX1	Nx	08d	20265	4915	6.168	19.64	0.015	1.34506	-0.258034	S	0	0.0544205	0.0404786	-0.656554	-0.664253
ATACCGAGTGGCTGCT-1_1	NX1	Nx	08d	13955	3731	5.403	22.558	0.05	-0.221763	-0.467974	G1	0	0.0544205	0.0404786	-0.394899	0.5527
ATACCGAGTGTCATCA-1_1	NX1	Nx	08d	43883	6663	4.858	24.267	0.021	0.601396	-0.567332	S	2	0.0971621	0.177399	-4.0241	-0.610168
ATACCGATCCACGTCT-1_1	NX1	Nx	08d	15958	4375	3.045	20.128	0.025	0.00292547	-0.672928	S	2	0.0971621	0.0404786	-1.61571	-2.90748
ATACCTTCAAGAAACT-1_1	NX1	Nx	08d	91926	8044	2.759	18.008	0.013	-0.347392	0.106148	G2M	1	0.0320019	0.177399	7.34743	4.96334
ATACCTTCAGGTAGTG-1_1	NX1	Nx	08d	14771	3720	5.782	23.506	0	-0.220963	-0.583823	G1	1	0.0320019	0.0404786	1.6299	-2.85055
ATACCTTCATAACCCA-1_1	NX1	Nx	08d	15008	4034	1.686	26.426	0.033	-0.0543148	-0.530396	G1	2	0.0971621	0.205118	-2.96468	-1.12217
ATACCTTGTAGAGATT-1_1	NX1	Nx	08d	36684	6219	4.383	24.984	0.025	0.0877158	1.11536	G2M	0	0.0544205	0.0404786	-0.0498099	0.438541
ATACCTTGTGAATTAG-1_1	NX1	Nx	08d	11763	3411	4.599	25.81	0.026	-0.298113	-0.369895	G1	0	0.0544205	0.344825	-1.74734	0.931012
ATACCTTTCCGGTTCT-1_1	NX1	Nx	08d	16770	4588	0.298	16.219	0.024	1.06429	1.17083	G2M	2	0.0971621	0.303249	-2.43766	-0.856491
ATACTTCAGCCGGAAT-1_1	NX1	Nx	08d	19057	4526	4.203	20.14	0.005	-0.169976	-0.249383	G1	4	0.0455568	0.135375	-1.70192	1.69118
ATACTTCAGTCATGAA-1_1	NX1	Nx	08d	10817	3279	2.487	19.312	0.009	-0.29964	0.430139	G2M	1	0.469393	0.0404786	-0.419013	3.12335
ATACTTCAGTTACGGG-1_1	NX1	Nx	08d	18300	4413	4.443	22.333	0.016	-0.0349421	0.302818	G2M	4	0.0455568	0.0404786	-0.877697	1.80205
ATACTTCCAAGGGTCA-1_1	NX1	Nx	08d	26034	5245	5.381	21.51	0.035	0.268517	-0.614189	S	2	0.0971621	0.0404786	-0.526233	-1.74352
ATACTTCGTCTGTAGT-1_1	NX1	Nx	08d	54676	7437	4.439	25.807	0.029	-0.127333	0.652414	G2M	0	0.0544205	0.443753	2.63535	-0.4913
ATACTTCGTGAATTAG-1_1	NX1	Nx	08d	16273	4125	5.58	25.797	0.037	-0.0428772	-0.531033	G1	3	0.0239706	0.0404786	-3.90376	1.4471
ATACTTCGTTGGCCTG-1_1	NX1	Nx	08d	23339	5190	3.471	21.668	0.021	-0.343213	1.89879	G2M	3	0.0239706	0.0404786	-3.52344	1.52386
ATACTTCTCCTCAGGG-1_1	NX1	Nx	08d	14077	3784	4.227	21.468	0.028	-0.511478	-0.62417	G1	4	0.0455568	0.0404786	-0.362389	1.66653
ATAGACCGTAAGACCG-1_1	NX1	Nx	08d	9184	3120	5.444	24.695	0.054	0.215179	0.695563	G2M	5	0.0236857	0.0404786	-9.60833	-4.30901
ATAGACCTCATTTGTC-1_1	NX1	Nx	08d	75135	8171	4.324	15.923	0.041	0.417437	-0.639094	S	1	0.0320019	0.0404786	7.0614	3.67197
ATAGAGAAGAACCCGA-1_1	NX1	Nx	08d	58056	6374	2.318	22.175	0.009	0.0865289	-0.0711547	S	1	0.0320019	0.0404786	6.46925	3.72285
ATAGAGAAGCACTGGA-1_1	NX1	Nx	08d	41457	6149	4.361	32.904	0.01	0.295524	-0.380901	S	5	0.0236857	0.177399	-12.3778	-4.46403
ATAGAGACACGTGAGA-1_1	NX1	Nx	08d	21489	4526	5.524	24.915	0.019	1.17561	0.240217	S	1	0.0320019	0.0404786	4.75247	2.43301
ATAGAGAGTTCGAAGG-1_1	NX1	Nx	08d	11451	3531	4.559	23.692	0.044	-0.397154	-0.514952	G1	2	0.0971621	0.0404786	-2.65256	-0.987692
ATAGGCTCAAGATTGA-1_1	NX1	Nx	08d	14426	3526	7.195	29.745	0.007	0.0134459	-0.245609	S	10	0	0.205118	14.0785	-1.89628
ATATCCTAGTTGGCTT-1_1	NX1	Nx	08d	14237	4009	5.057	20.58	0.021	-0.240331	-0.551764	G1	2	0.0971621	0.110069	-1.49293	-3.83284
ATATCCTCAAACACCT-1_1	NX1	Nx	08d	23401	3173	2.363	43.806	0.004	-0.129788	-0.382879	G1	7	0.0277228	0.0404786	-7.12876	-7.26554
ATATCCTCATCCGCGA-1_1	NX1	Nx	08d	38849	6128	2.296	17.187	0.018	0.262784	1.38494	G2M	1	0.0320019	0.0404786	6.4677	4.67207
ATATCCTGTTGCGTAT-1_1	NX1	Nx	08d	20123	4857	5.978	18.168	0.015	0.359109	2.1667	G2M	3	0.0239706	0.0404786	-1.88022	5.0167
ATATCCTTCATGCAGT-1_1	NX1	Nx	08d	23753	5307	4.9	17.855	0.034	0.570581	0.00309833	S	0	0.0544205	0.931585	-1.36431	3.3003
ATCACAGAGCAGCGAT-1_1	NX1	Nx	08d	26841	5458	6.181	21.355	0.015	0.0648156	1.65272	G2M	1	0.0320019	0.0404786	3.26496	4.8409
ATCACAGAGTGCCAGA-1_1	NX1	Nx	08d	18722	4441	4.903	20.885	0.016	0.360607	0.584476	G2M	0	0.0544205	0.0404786	-2.02633	2.76633
ATCACAGCACTCAAGT-1_1	NX1	Nx	08d	17796	4270	5.451	22.764	0.017	-0.175539	-0.66385	G1	0	0.0544205	0.0404786	2.37559	-2.04641
ATCACAGTCCAACACA-1_1	NX1	Nx	08d	18773	4470	4.991	20.247	0.032	-0.254296	-0.845807	G1	2	0.0971621	0.205118	-0.732145	-2.52228
ATCACAGTCTAGGCAT-1_1	NX1	Nx	08d	15740	4413	6.366	16.506	0.019	0.514404	-0.689961	S	4	0.0455568	0.0404786	-1.22536	1.46701
ATCACGAAGTAACCTC-1_1	NX1	Nx	08d	20155	4689	4.689	20.987	0.01	0.453163	1.75784	G2M	0	0.0544205	0.0404786	3.91074	-0.266253
ATCACGACAACAAAGT-1_1	NX1	Nx	08d	40879	6155	2.923	19.837	0.034	0.833843	0.625895	S	1	0.0320019	0.177399	5.1946	2.75411
ATCACTTAGCTGAGTG-1_1	NX1	Nx	08d	25054	5127	5.472	24.77	0.032	0.540822	1.40454	G2M	4	0.0455568	0.0404786	-0.758441	1.75046
ATCACTTGTTAGGACG-1_1	NX1	Nx	08d	11230	3009	6.305	28.78	0.009	-0.139473	-0.109099	G1	4	0.0455568	0.135375	-1.66505	1.64149
ATCAGGTAGAGCACTG-1_1	NX1	Nx	08d	33683	5376	4.207	23.231	0.018	1.00998	0.151495	S	1	0.0320019	0.0404786	5.4629	2.60654
ATCAGGTAGCATCCTA-1_1	NX1	Nx	08d	19380	4338	4.185	20.831	0.015	0.171852	1.11587	G2M	1	0.0320019	0.0404786	1.27608	-1.80852
ATCAGGTGTATGCAAA-1_1	NX1	Nx	08d	32260	5537	4.938	19.64	0.028	-0.0995952	-0.433946	G1	1	0.0320019	0.893901	6.29081	3.15675
ATCAGGTTCTCAACGA-1_1	NX1	Nx	08d	29927	5383	2.613	20.644	0.017	1.0283	0.725856	S	1	0.0320019	0.0404786	4.50526	4.94565
ATCATTCCATAGGCGA-1_1	NX1	Nx	08d	29829	5537	4.02	23.524	0.023	0.211389	1.7923	G2M	1	0.0320019	0.0404786	1.47864	-1.92293
ATCATTCCATCTCATT-1_1	NX1	Nx	08d	21060	4909	4.335	19.188	0.047	-0.37676	-0.625332	G1	4	0.0455568	0.0646147	0.30311	1.04375
ATCCACCCACTAGGCC-1_1	NX1	Nx	08d	40967	6759	3.683	16.721	0.039	-0.0834197	1.86111	G2M	2	0.0971621	0.931585	-0.922071	-3.67202
ATCCACCGTTGGGAAC-1_1	NX1	Nx	08d	29203	5595	8.667	23.484	0.014	0.744138	1.60211	G2M	3	0.0239706	0.0404786	-4.87138	1.6863
ATCCATTAGGGCTAAC-1_1	NX1	Nx	08d	34404	6304	5.589	18.14	0.009	0.541476	-0.398763	S	2	0.430188	0.0404786	-0.520908	1.49861
ATCCATTAGTGCCCGT-1_1	NX1	Nx	08d	21434	4473	4.292	25.758	0.009	-0.00644516	-0.621873	G1	0	0.0544205	0.0404786	2.68608	0.625967
ATCCATTCACGTCGGT-1_1	NX1	Nx	08d	17525	4169	4.548	27.104	0.068	-0.516054	-0.575587	G1	0	0.0544205	0.100565	1.3631	0.733547
ATCCCTGCACCGCTAG-1_1	NX1	Nx	08d	13834	3916	3.622	19.727	0.036	0.298456	-0.549227	S	2	0.0971621	0.0404786	-3.56302	-1.12365
ATCCCTGGTTTCCATT-1_1	NX1	Nx	08d	19186	4776	5.895	20.864	0.083	-0.29849	-0.470769	G1	3	0.0239706	0.0646147	-4.28005	1.80238
ATCCCTGTCCATGATG-1_1	NX1	Nx	08d	23207	5449	4.667	15.974	0.043	1.2165	0.341152	S	0	0.40363	0.0404786	-1.40833	-0.175208
ATCCGTCTCACTGAAC-1_1	NX1	Nx	08d	104535	9180	4.653	22.935	0.03	0.876825	0.657451	S	0	0.0544205	0.931585	3.81339	-1.86099
ATCCTATAGTGATCGG-1_1	NX1	Nx	08d	11890	3662	3.793	25.601	0.05	0.104765	-0.502094	S	2	0.0971621	0.233633	-2.7376	-1.53706
ATCCTATGTCGTGGAA-1_1	NX1	Nx	08d	16794	4387	4.186	18.036	0.024	0.140056	1.77779	G2M	0	0.0544205	0.374009	0.56471	0.712524
ATCGATGAGCTCGACC-1_1	NX1	Nx	08d	16847	3986	5.793	26.735	0.024	0.0567061	-0.469258	S	3	0.0239706	0.0404786	-4.80668	2.08668
ATCGATGAGTGGTTGG-1_1	NX1	Nx	08d	26315	5272	5.917	25.358	0.038	0.0426088	1.92947	G2M	3	0.0239706	0.443753	-4.62758	1.99327
ATCGATGCAACACAGG-1_1	NX1	Nx	08d	24604	5357	3.483	20.261	0.012	1.17601	0.0372607	S	3	0.0239706	0.135375	-3.33414	4.10549
ATCGATGCACACCTTC-1_1	NX1	Nx	08d	29568	5901	4.853	18.53	0.034	0.594293	1.93881	G2M	3	0.0239706	0.0646147	-4.69709	2.21078
ATCGATGCACAGGATG-1_1	NX1	Nx	08d	22945	5158	5.823	21.242	0.044	0.358086	-0.46043	S	0	0.0544205	0.0404786	-1.10037	2.40624
ATCGATGGTGGCTAGA-1_1	NX1	Nx	08d	22418	4580	5.58	22.54	0.031	0.954822	0.306714	S	3	0.0239706	0.0404786	-1.60181	4.86032
ATCGCCTGTACCGGAA-1_1	NX1	Nx	08d	51056	7434	3.737	20.92	0.022	0.563612	0.903441	G2M	0	0.0544205	0.303249	0.41931	-1.12335
ATCGCCTGTGGTATGG-1_1	NX1	Nx	08d	45430	7095	8.532	16.124	0.013	0.85394	1.58577	G2M	5	0.0236857	0.303249	-7.67512	-6.71976
ATCGCCTGTTGACTGT-1_1	NX1	Nx	08d	13450	3781	5.524	22.29	0.015	-0.138782	-0.610587	G1	2	0.0971621	0.0646147	-2.40418	-2.63537
ATCGCCTTCATACGGT-1_1	NX1	Nx	08d	26082	5093	5.636	20.731	0.023	0.177339	-0.327493	S	1	0.0320019	0.0404786	6.48902	5.06233
ATCGGATAGTATGCAA-1_1	NX1	Nx	08d	20928	4949	5.858	20.556	0.019	0.626442	1.35226	G2M	0	0.0544205	0.0404786	3.32708	-1.09564
ATCGGATCAGACAAAT-1_1	NX1	Nx	08d	11846	3510	5.057	24.456	0	-0.0556956	-0.661024	G1	2	0.0971621	0.0404786	-1.03111	-3.5891
ATCGGATTCAAGGAGC-1_1	NX1	Nx	08d	16331	4025	4.874	27.016	0.024	-0.45868	-0.650665	G1	2	0.0971621	0.0404786	-0.1552	-2.59237
ATCGGATTCGCTAAAC-1_1	NX1	Nx	08d	8972	3010	6.922	23.395	0.022	-0.238168	-0.549113	G1	0	0.0544205	0.0404786	-1.65337	1.1022
ATCGGCGCAGATCACT-1_1	NX1	Nx	08d	24212	4815	4.969	20.833	0.029	-0.108999	-0.541575	G1	1	0.0320019	0.0404786	4.37765	4.945
ATCGGCGTCCATATGG-1_1	NX1	Nx	08d	28121	5508	4.406	15.476	0.025	0.14218	-0.69251	S	3	0.0239706	0.177399	-0.402299	4.97398
ATCGGCGTCTAACGCA-1_1	NX1	Nx	08d	114660	9123	6.321	21.779	0.028	0.286253	0.85835	G2M	0	0.0544205	0.0404786	4.02213	-2.1941
ATCGTAGTCATCACAG-1_1	NX1	Nx	08d	14695	4138	4.954	18.326	0	0.0199057	1.11806	G2M	2	0.0971621	0.0404786	1.62125	-3.53131
ATCGTCCAGCCACTCG-1_1	NX1	Nx	08d	19411	4654	4.07	18.057	0.041	0.200258	1.37091	G2M	1	0.0320019	0.0404786	2.92904	5.35185
ATCGTCCGTGCCTTCT-1_1	NX1	Nx	08d	16824	4143	5.118	19.96	0.006	1.04795	-0.240076	S	0	0.0544205	0.0404786	4.85017	0.131548
ATCGTGACAAACCACT-1_1	NX1	Nx	08d	12371	3779	4.349	16.83	0.032	0.778574	-0.106882	S	3	0.0239706	0.0404786	-1.25379	5.22543
ATCGTGATCACCATAG-1_1	NX1	Nx	08d	16359	4068	4.071	27.453	0.012	0.197102	-0.286363	S	5	0.0236857	0.328529	-11.5492	-4.6074
ATCGTGATCTGTCGCT-1_1	NX1	Nx	08d	17665	4347	4.206	24.166	0.023	-0.17549	-0.642634	G1	0	0.0544205	0.0404786	0.215786	-1.12836
ATCTCTAAGGAAGAAC-1_1	NX1	Nx	08d	15783	4254	2.598	23.494	0.013	-0.184571	-0.77938	G1	2	0.0971621	0.205118	-2.81457	-3.01337
ATCTCTACAAGAGTGC-1_1	NX1	Nx	08d	26281	5050	6.834	22.537	0.03	-0.106131	-0.68866	G1	1	0.0320019	0.177399	4.3634	5.18512
ATCTCTACATCAGTCA-1_1	NX1	Nx	08d	13126	3716	4.419	22.467	0	-0.200117	-0.406742	G1	2	0.0971621	0.0404786	-1.74582	-3.74639
ATCTCTATCTAGGCCG-1_1	NX1	Nx	08d	43124	6921	5.582	17.229	0.023	0.585431	1.47065	G2M	3	0.0239706	0.0404786	-2.95768	2.46081
ATCTTCAAGACGCCCT-1_1	NX1	Nx	08d	19043	4315	5.377	22.323	0.032	-0.198787	-0.663657	G1	0	0.0544205	0.0404786	-0.19279	-0.553243
ATGAAAGCACAAGCTT-1_1	NX1	Nx	08d	14276	2961	2.354	31.43	0.007	-0.33074	-0.270509	G1	7	0.0277228	0.177399	-8.14614	-6.26318
ATGAAAGTCCACGTGG-1_1	NX1	Nx	08d	55760	7026	2.407	22.166	0.032	0.236786	1.17735	G2M	1	0.0320019	0.0404786	6.0695	3.2614
ATGAAAGTCTCAGTCC-1_1	NX1	Nx	08d	10752	3338	6.138	25.623	0.037	-0.439552	-0.665132	G1	3	0.0239706	0.0404786	-4.3062	2.36246
ATGACCAAGGCCTTGC-1_1	NX1	Nx	08d	27899	5481	4.86	21.148	0.022	0.0228866	-0.631152	S	0	0.0544205	0.0404786	1.73032	1.12425
ATGACCACAACTGAAA-1_1	NX1	Nx	08d	20695	4794	3.788	23.745	0.024	0.251979	0.939431	G2M	0	0.0544205	0.0404786	2.62163	1.22877
ATGACCATCCCTATTA-1_1	NX1	Nx	08d	34216	5986	3.732	21.066	0.026	0.144273	1.40542	G2M	0	0.0544205	0.0404786	2.12654	-0.73945
ATGAGGGAGGCATCAG-1_1	NX1	Nx	08d	22807	5069	5.108	23.181	0.013	0.0701233	1.75416	G2M	0	0.0544205	0.181218	1.94605	-0.0630792
ATGAGGGCACTGCACG-1_1	NX1	Nx	08d	39824	6118	4.628	23.564	0.015	0.804735	0.161307	S	1	0.0320019	0.0404786	4.82057	4.93516
ATGAGGGCATCGCTCT-1_1	NX1	Nx	08d	11308	3338	2.715	26.353	0	-0.208631	0.646616	G2M	2	0.0971621	0.0404786	-4.21722	-0.674372
ATGAGGGGTCCATCTC-1_1	NX1	Nx	08d	26312	5371	4.964	22.746	0.008	0.473045	0.844788	G2M	0	0.0544205	0.0404786	2.25945	0.514125
ATGAGGGGTGACTATC-1_1	NX1	Nx	08d	36581	5877	5.167	16.935	0.016	0.513527	0.706668	G2M	3	0.0239706	0.0404786	-0.501933	5.30356
ATGAGTCAGGCAGCTA-1_1	NX1	Nx	08d	33685	6033	4.397	18.685	0.027	0.659279	1.42199	G2M	4	0.0455568	0.0404786	0.613771	1.71249
ATGAGTCGTCGCCACA-1_1	NX1	Nx	08d	36752	5618	4.06	25.947	0.027	-0.131998	-0.115269	G1	6	0	0.0646147	-1.35294	-13.5362
ATGATCGAGTCACTAC-1_1	NX1	Nx	08d	16277	4192	4.847	19.383	0.006	1.02022	-0.0116232	S	2	0.541832	0.931585	-0.179859	-1.87823
ATGATCGCAGCGACAA-1_1	NX1	Nx	08d	16648	4298	4.607	22.117	0.06	0.306436	-0.53388	S	0	0.0544205	0.0404786	3.94078	-1.03772
ATGATCGGTGTCTAAC-1_1	NX1	Nx	08d	12678	3514	3.526	28.38	0.039	-0.119901	-0.399696	G1	5	0.0236857	0.0646147	-11.8963	-4.30478
ATGATCGTCTCAACGA-1_1	NX1	Nx	08d	84796	7431	2.406	28.014	0.013	0.320214	-0.180807	S	1	0.0320019	0.0404786	6.42711	3.90204
ATGCATGAGCGACCCT-1_1	NX1	Nx	08d	27105	4977	3.379	34.658	0.015	0.230341	-0.465413	S	10	0	0.0404786	14.0715	-1.9031
ATGCATGAGCTGTTAC-1_1	NX1	Nx	08d	25592	5250	2.876	22.163	0.004	0.349407	1.36301	G2M	4	0.0455568	0.0404786	-0.0256556	1.96793
ATGCATGCACTAGAGG-1_1	NX1	Nx	08d	42947	5768	4.31	17.922	0.009	-0.199172	-0.619884	G1	1	0.0320019	0.931585	7.71122	4.70197
ATGCATGGTGTAGGAC-1_1	NX1	Nx	08d	11147	3253	7.751	24.85	0.027	-0.158185	-0.565284	G1	5	0.0236857	0.181218	-10.8924	-4.7015
ATGCATGTCAGGACAG-1_1	NX1	Nx	08d	16902	3841	4.278	30.393	0.047	-0.0260526	-0.526121	G1	5	0.0236857	0.0404786	-12.3467	-4.60112
ATGCATGTCATACAGC-1_1	NX1	Nx	08d	27917	5441	5.069	22.363	0.018	1.05075	-0.401877	S	3	0.0239706	0.0404786	-1.82798	4.77305
ATGCCTCGTACTCCCT-1_1	NX1	Nx	08d	7208	1649	3.524	25.819	0.014	-0.000898571	-0.3729	G1	1	0.0320019	0.0404786	4.97345	4.29324
ATGCCTCGTCCTCAGG-1_1	NX1	Nx	08d	15157	4168	4.691	23.217	0.02	-0.1814	-0.00545237	G1	5	0.0236857	0.0404786	-12.299	-4.60271
ATGCGATAGCAAACAT-1_1	NX1	Nx	08d	15181	4114	4.651	22.765	0.04	-0.105491	-0.797373	G1	2	0.0971621	0.0646147	-2.20346	-2.08276
ATGCGATGTGGACTAG-1_1	NX1	Nx	08d	15098	3872	5.199	20.771	0.04	-0.187729	-0.475349	G1	4	0.0455568	0.177399	-0.053458	2.39404
ATGCGATGTTGCACGC-1_1	NX1	Nx	08d	14886	3999	5.038	20.301	0.027	0.361202	1.18163	G2M	0	0.0544205	0.0404786	-0.682432	3.31323
ATGGAGGAGACGTCCC-1_1	NX1	Nx	08d	24029	4856	6.484	26.668	0.017	0.366771	1.71999	G2M	1	0.0320019	0.0404786	6.49934	4.58228
ATGGAGGAGAGTTCGG-1_1	NX1	Nx	08d	16470	3983	7.845	26.321	0.012	-0.0968973	-0.566318	G1	1	0.0320019	0.0404786	1.07207	-1.80632
ATGGAGGCAAAGGCGT-1_1	NX1	Nx	08d	9474	2840	6.08	24.826	0.021	-0.0357073	1.3411	G2M	2	0.0971621	0.0404786	-2.28871	-0.117122
ATGGAGGTCTCATGGA-1_1	NX1	Nx	08d	24659	4815	5.13	18.07	0.02	0.0700049	-0.622901	S	1	0.0320019	0.205118	2.05135	4.6347
ATGGATCGTACTGCGC-1_1	NX1	Nx	08d	14940	3966	2.691	24.029	0.02	-0.251152	-0.499922	G1	0	0.0544205	0.0404786	2.73048	-2.31581
ATGGATCGTGGAAGTC-1_1	NX1	Nx	08d	15344	3964	5.364	24.075	0.033	-0.364442	-0.648648	G1	1	0.0320019	0.931585	0.612943	-2.74084
ATGGATCTCACACGAT-1_1	NX1	Nx	08d	45208	6622	6.647	25.88	0.033	0.982106	0.789097	S	5	0.0236857	0.177399	-7.67883	-6.97294
ATGGGAGAGATAACAC-1_1	NX1	Nx	08d	19484	4241	4.753	24.502	0.026	-0.149144	-0.715428	G1	0	0.0544205	0.0404786	2.39961	1.50493
ATGGGAGTCTGGTGGC-1_1	NX1	Nx	08d	37991	5427	2.901	22.929	0.005	-0.253324	-0.388685	G1	1	0.0320019	0.177399	4.94792	4.70982
ATGGGTTAGTCGTCTA-1_1	NX1	Nx	08d	16043	4255	2.861	25.718	0.019	0.224796	1.7497	G2M	2	0.0971621	0.110069	-2.70414	-2.64748
ATGGGTTCAATGTCAC-1_1	NX1	Nx	08d	21004	4839	3.723	21.02	0.029	-0.287637	-0.592741	G1	0	0.0544205	0.0404786	1.86473	0.708795
ATGGGTTCAGTACTAC-1_1	NX1	Nx	08d	26774	4737	3.511	26.787	0.015	1.14503	0.537569	S	6	0	0.0404786	0.61818	-13.3611
ATGGGTTCATTAAGCC-1_1	NX1	Nx	08d	14394	4124	5.141	21.69	0.035	-0.42927	-0.434535	G1	2	0.0971621	0.0404786	-3.50608	-2.008
ATGGGTTGTGGGTATG-1_1	NX1	Nx	08d	23951	5213	6.321	18.609	0.013	0.212679	1.39447	G2M	1	0.0320019	0.0404786	2.8986	5.14957
ATGGGTTTCGCAATGT-1_1	NX1	Nx	08d	27082	5597	5.55	18.931	0.048	0.52638	0.805747	G2M	0	0.0544205	0.0404786	2.66105	-0.960622
ATGGTTGAGATCCCGC-1_1	NX1	Nx	08d	12999	3395	4.885	27.941	0.015	0.353932	-0.0808207	S	3	0.0239706	0.303249	-2.5484	3.33548
ATGGTTGCATGGGCAA-1_1	NX1	Nx	08d	26849	5390	4.685	24.943	0.022	1.05191	0.683061	S	0	0.0544205	0.177399	1.54788	-0.318788
ATGGTTGGTATGGAGC-1_1	NX1	Nx	08d	22701	4694	4.894	31.536	0.018	1.57175	0.140778	S	5	0.0236857	0.181218	-12.4407	-4.62855
ATGTCCCCAGATTAAG-1_1	NX1	Nx	08d	16660	4054	5.288	25.342	0.012	-0.122114	-0.736408	G1	0	0.0544205	0.135375	-0.981842	-0.0523236
ATGTCCCCATCCAATG-1_1	NX1	Nx	08d	20663	4809	6.175	22.141	0.01	0.399879	1.74207	G2M	4	0.397687	0.0404786	-3.11649	-0.181671
ATGTCCCGTAGTGCGA-1_1	NX1	Nx	08d	11066	3215	3.606	28.673	0	0.284	-0.582039	S	2	0.605018	0.205118	1.15889	-2.50423
ATGTCCCGTTCCCACT-1_1	NX1	Nx	08d	41191	6018	4.46	21.437	0.024	0.19269	-0.594623	S	1	0.0320019	0.0404786	5.39747	4.82537
ATGTCCCGTTGGGATG-1_1	NX1	Nx	08d	36571	6402	6.481	21.503	0.022	-0.0329851	1.49787	G2M	0	0.0544205	0.0404786	-1.93141	0.162745
ATGTCTTGTGTACATC-1_1	NX1	Nx	08d	22240	4892	5.409	26.223	0	0.992727	1.14596	G2M	2	0.0971621	0.0404786	-1.84211	-2.99211
ATTACCTAGGTAGTCG-1_1	NX1	Nx	08d	23334	4954	3.086	25.118	0.004	1.19596	0.80059	S	0	0.0544205	0.181218	2.63834	-1.54687
ATTACCTAGTGGCCTC-1_1	NX1	Nx	08d	11420	3374	1.235	25.018	0.009	-0.245343	0.116387	G2M	0	0.0544205	0.205118	2.38214	-1.03259
ATTACCTCAGACACAG-1_1	NX1	Nx	08d	30451	5708	2.755	17.169	0.033	-0.018066	-0.511382	G1	1	0.0320019	0.0404786	5.95358	4.14999
ATTACCTTCGCCACTT-1_1	NX1	Nx	08d	40098	6324	4.422	17.357	0.027	0.253199	1.62039	G2M	0	0.0544205	0.0404786	0.0648454	1.06607
ATTACTCAGCGATGGT-1_1	NX1	Nx	08d	56624	7247	4.634	22.044	0.023	0.839045	-0.468682	S	0	0.0544205	0.782715	2.31566	0.911597
ATTACTCAGGGTTAGC-1_1	NX1	Nx	08d	21321	5096	5.849	17.119	0.023	0.735508	1.61513	G2M	2	0.0971621	0.0404786	-0.942404	-2.65811
ATTATCCAGCAGATAT-1_1	NX1	Nx	08d	14000	3881	3.771	20.236	0.036	0.509576	-0.162996	S	0	0.0544205	0.303249	-0.695344	2.07156
ATTATCCAGGTCACTT-1_1	NX1	Nx	08d	14235	3767	4.819	23.948	0	-0.0446232	1.31078	G2M	2	0.0971621	0.0404786	1.53895	-3.7296
ATTATCCAGTGACCTT-1_1	NX1	Nx	08d	8641	2543	0.116	21.595	0.058	0.68348	1.76629	G2M	5	0.0236857	0.205118	-8.42081	-4.6182
ATTATCCAGTGCAGGT-1_1	NX1	Nx	08d	18839	4528	4.024	27.427	0.027	-0.153755	-0.611794	G1	5	0.0236857	0.0404786	-11.7533	-4.55427
ATTATCCCAACTCGAT-1_1	NX1	Nx	08d	24868	4895	5.151	23.975	0.024	0.0799692	-0.403805	S	0	0.0544205	0.0404786	4.85944	0.096676
ATTATCCCAGTTAGGG-1_1	NX1	Nx	08d	4951	1631	0.162	37.629	0	0.409948	-0.18304	S	1	0.441542	0.0404786	-9.96043	-3.38771
ATTCACTCAGCTGAGA-1_1	NX1	Nx	08d	11454	3540	3.999	22.036	0.009	-0.265851	1.65322	G2M	2	0.0971621	0.233633	-2.83692	-0.599046
ATTCAGGAGCCGTTAT-1_1	NX1	Nx	08d	12184	3492	4.194	24.319	0.016	0.157245	0.214028	G2M	3	0.0239706	0.0404786	-2.49857	3.2655
ATTCAGGCAGTCGTTA-1_1	NX1	Nx	08d	13281	3923	5.113	20.337	0.03	-0.0811019	-0.0683202	G1	4	0.0455568	0.0404786	-0.058999	2.75058
ATTCAGGGTCCACAGC-1_1	NX1	Nx	08d	16314	3804	5.278	24.746	0.025	-0.136155	-0.313905	G1	0	0.0544205	0.0404786	2.30271	1.10841
ATTCATCAGCGGTAAC-1_1	NX1	Nx	08d	31364	5687	5.13	18.26	0.013	0.800497	0.740071	S	1	0.0320019	0.0404786	2.1787	5.35645
ATTCATCGTCTGCGCA-1_1	NX1	Nx	08d	21200	5077	5.486	13.797	0.024	-0.0909266	-0.575228	G1	1	0.0320019	0.0404786	2.54044	4.29167
ATTCCATGTAAGTAGT-1_1	NX1	Nx	08d	9987	2109	8.641	27.916	0.03	0.0933079	-0.361033	S	1	0.0320019	0.0404786	5.61937	4.51379
ATTCCATGTGCGGATA-1_1	NX1	Nx	08d	21055	4155	5.239	28.801	0.014	-0.189361	-0.498205	G1	8	0	0.135375	5.82708	-9.66905
ATTCCATTCGGTGCAC-1_1	NX1	Nx	08d	42458	6160	6.484	23.32	0.019	0.381134	1.45603	G2M	0	0.0544205	0.931585	4.92943	-0.737827
ATTCCATTCTAGTGTG-1_1	NX1	Nx	08d	13569	3712	6.213	23.473	0.022	-0.0919285	-0.669414	G1	2	0.0971621	0.0404786	-1.20923	-2.36343
ATTCCCGAGTTTCGGT-1_1	NX1	Nx	08d	19095	4464	5.221	24.865	0.005	0.57932	-0.468953	S	4	0.0455568	0.0404786	-1.2045	1.48428
ATTCCCGGTCGCCACA-1_1	NX1	Nx	08d	21297	4964	6.794	16.35	0.033	-0.0741004	-0.52386	G1	4	0.0455568	0.0404786	-1.06849	2.1394
ATTCCCGGTGAGGAAA-1_1	NX1	Nx	08d	13095	3545	2.222	28.4	0.053	-0.294603	-0.613385	G1	0	0.0544205	0.443753	-1.31085	2.7926
ATTCCCGGTTAGGGAC-1_1	NX1	Nx	08d	64623	8101	3.624	23.092	0.036	0.00615021	-0.913983	S	2	0.0971621	0.177399	-3.90001	-2.89392
ATTCCCGTCCATCCGT-1_1	NX1	Nx	08d	14744	3970	4.7	19.289	0.041	-0.102635	-0.00452916	G1	4	0.0455568	0.0551106	-1.72892	1.70668
ATTCCCGTCTACTATC-1_1	NX1	Nx	08d	12875	3820	4.303	21.701	0.016	-0.104463	0.553423	G2M	2	0.0971621	0.0404786	-3.17258	-1.01172
ATTCCTATCAAAGCCT-1_1	NX1	Nx	08d	20030	4735	3.889	20.844	0.03	0.006275	-0.836396	S	0	0.0544205	0.177399	0.575703	-1.08764
ATTCCTATCGTTGTAG-1_1	NX1	Nx	08d	27025	5103	4.925	24.019	0.011	0.673231	-0.451476	S	1	0.574373	0.0404786	5.19748	2.334
ATTCGTTAGTGTTCAC-1_1	NX1	Nx	08d	21763	4617	5.872	26.522	0.032	0.789607	-0.367933	S	4	0.0455568	0.0404786	-2.06029	1.15143
ATTCGTTGTGCAGTGA-1_1	NX1	Nx	08d	10989	3541	7.69	21.658	0.055	-0.164657	1.50911	G2M	2	0.0971621	0.0646147	-3.38692	-0.16052
ATTCGTTTCGGTCAGC-1_1	NX1	Nx	08d	13637	3826	3.168	21.757	0.015	-0.122649	0.860734	G2M	0	0.0544205	0.0404786	-0.842405	2.73384
ATTCTACAGCGGCTCT-1_1	NX1	Nx	08d	23621	5201	4.699	19.986	0.004	0.561898	1.1297	G2M	4	0.0455568	0.0404786	-0.658625	1.67612
ATTCTACAGGACCCAA-1_1	NX1	Nx	08d	16067	4121	5.751	23.564	0.031	-0.496891	-0.549143	G1	4	0.0455568	0.931585	-1.16826	0.878931
ATTCTACGTGTTACAC-1_1	NX1	Nx	08d	22232	4318	5.987	31.635	0.004	0.46554	1.40466	G2M	9	0	0.0404786	-7.39833	-9.74052
ATTCTACTCAAACGAA-1_1	NX1	Nx	08d	11030	3272	2.212	29.674	0.018	0.0484908	0.755179	G2M	2	0.430188	0.218419	-3.75687	-1.14089
ATTCTTGTCGAGCCTG-1_1	NX1	Nx	08d	3195	1727	0.282	5.665	0.031	-0.0572342	-0.530361	G1	2	0.0971621	0.0404786	-2.18475	-2.30783
ATTCTTGTCTTGGAAC-1_1	NX1	Nx	08d	10116	3421	3.46	21.886	0.01	-0.257819	-0.522902	G1	2	0.0971621	0.135375	-2.89159	-3.27353
ATTGGGTAGCATACTC-1_1	NX1	Nx	08d	14472	4218	4.789	21.414	0.035	-0.0251338	1.28792	G2M	2	0.0971621	0.135375	-3.13592	-1.26051
ATTGGGTGTTTCTATC-1_1	NX1	Nx	08d	34753	5536	4.923	20.323	0.02	-0.297952	-0.548413	G1	1	0.0320019	0.0646147	6.1465	5.38877
ATTGGGTTCAAGTAAG-1_1	NX1	Nx	08d	15593	4014	7.253	24.485	0.006	-0.277312	-0.389539	G1	0	0.0544205	0.0404786	-0.0378383	0.00390719
ATTGTTCAGCCGATCC-1_1	NX1	Nx	08d	12634	4004	0.981	22.392	0.055	-0.0290031	-0.418188	G1	2	0.430188	0.205118	-1.76177	-0.0331701
ATTGTTCAGCGACCCT-1_1	NX1	Nx	08d	20285	4670	1.765	26.202	0.015	0.42478	1.7434	G2M	2	0.0971621	0.181218	-2.33143	-2.32567
ATTGTTCAGGACGCTA-1_1	NX1	Nx	08d	19214	2399	1.671	33.694	0.005	-0.259584	-0.266877	G1	7	0.0277228	0.233633	-8.06429	-6.4786
ATTGTTCCAAGACCGA-1_1	NX1	Nx	08d	20531	2719	1.14	22.683	0.005	-0.297056	-0.212856	G1	7	0.0277228	0.233633	-8.21495	-6.18624
ATTGTTCGTCGACTGC-1_1	NX1	Nx	08d	17231	4163	4.834	21.409	0.029	-0.0604946	0.0856189	G2M	0	0.0544205	0.0404786	2.82647	1.05528
ATTGTTCGTTAAACCC-1_1	NX1	Nx	08d	22726	4870	4.704	18.807	0.022	1.26173	0.728493	S	1	0.0320019	0.0404786	2.61371	3.89489
ATTGTTCGTTAGGACG-1_1	NX1	Nx	08d	16272	4274	4.382	18.682	0.031	-0.465286	-0.605204	G1	0	0.0544205	0.0404786	-0.314793	-0.496611
ATTGTTCTCCTTTAGT-1_1	NX1	Nx	08d	19363	4640	4.121	20.963	0.036	0.00862198	1.16667	G2M	4	0.0455568	0.0404786	-2.15553	1.35563
ATTGTTCTCGAGCCTG-1_1	NX1	Nx	08d	27251	5513	3.978	19.739	0.022	1.33217	0.507585	S	0	0.0544205	0.0404786	-2.81767	1.62872
ATTTACCAGCGCTTCG-1_1	NX1	Nx	08d	27663	5712	2.494	22.254	0.047	-0.117204	-0.446863	G1	4	0.0455568	0.28906	-0.924131	0.944378
ATTTACCGTAGACACG-1_1	NX1	Nx	08d	24294	5285	4.668	20.417	0.078	0.469865	-0.441328	S	4	0.0455568	0.0404786	-1.11043	2.34176
ATTTCACCAACCGCCA-1_1	NX1	Nx	08d	32585	6278	3.041	20.743	0.031	0.237574	1.60361	G2M	4	0.0455568	0.0404786	-0.392192	1.78171
ATTTCACCAGCTTCGG-1_1	NX1	Nx	08d	17889	4211	4.942	23.875	0.022	-0.228755	-0.624291	G1	0	0.0544205	0.0404786	0.823679	0.126335
ATTTCACGTTGTAAAG-1_1	NX1	Nx	08d	30816	5710	5.186	22.122	0.01	0.518844	1.47776	G2M	5	0.0236857	0.233633	-11.7419	-4.76613
ATTTCTGGTCTAATCG-1_1	NX1	Nx	08d	20702	5314	2.009	14.385	0.048	1.10366	0.546266	S	4	0.746282	0.303249	-0.251896	0.495857
CAAAGAACACAATCTG-1_1	NX1	Nx	08d	12727	2102	1.076	32.246	0	-0.175843	-0.2943	G1	7	0.0277228	0.233633	-8.08384	-6.4487
CAAAGAAGTACCATAC-1_1	NX1	Nx	08d	22852	4835	8.096	21.495	0.018	0.446628	1.31832	G2M	0	0.0544205	0.0404786	0.322884	-0.38313
CAAAGAAGTAGAGACC-1_1	NX1	Nx	08d	17186	4061	5.219	23.979	0.017	0.0649205	-0.55953	S	0	0.0544205	0.0404786	-0.260734	-0.145553
CAAAGAAGTGGCTCTG-1_1	NX1	Nx	08d	19540	4417	6.259	24.729	0.02	0.083199	-0.587376	S	0	0.0544205	0.0404786	4.79198	-0.36697
CAACAACGTCCAGCCA-1_1	NX1	Nx	08d	15936	3920	3.709	27.617	0.019	-0.0414352	-0.402742	G1	2	0.0971621	0.0404786	-0.836659	-2.14871
CAACAACTCGCTAGCG-1_1	NX1	Nx	08d	18229	4500	3.9	22.634	0.011	0.0933516	-0.596037	S	0	0.0544205	0.0404786	-0.627177	0.321286
CAACAGTCAAGAATGT-1_1	NX1	Nx	08d	20414	4989	6.123	17.821	0	-0.280143	-0.700999	G1	2	0.0971621	0.0404786	-3.00236	-2.71309
CAACCTCAGGCACAAC-1_1	NX1	Nx	08d	51921	7197	4.661	20.067	0.035	0.586688	1.24645	G2M	4	0.0455568	0.0404786	-0.413713	1.7084
CAACCTCAGGGAGGTG-1_1	NX1	Nx	08d	26456	5266	4.623	28.254	0.015	0.340853	1.37154	G2M	5	0.0236857	0.0404786	-9.92888	-4.23623
CAACCTCAGTTGTCAC-1_1	NX1	Nx	08d	15003	3717	3.579	27.708	0.04	-0.313056	-0.576645	G1	4	0.0455568	0.0404786	-0.272583	1.54673
CAACCTCGTATTGCCA-1_1	NX1	Nx	08d	18844	4290	3.826	23.318	0.042	0.0259555	0.0062522	S	0	0.0544205	0.135375	3.46246	0.861331
CAACCTCGTTCTCTAT-1_1	NX1	Nx	08d	22706	4973	4.607	20.986	0.048	-0.250451	-0.549019	G1	4	0.0455568	0.233633	-0.371538	2.0091
CAACGATCAAGTTCGT-1_1	NX1	Nx	08d	39381	5901	3.461	17.173	0.01	-0.350419	-0.68242	G1	1	0.0320019	0.0404786	7.6659	4.78305
CAACGATCATGACAAA-1_1	NX1	Nx	08d	43255	6438	5.054	22.707	0.025	0.758028	-0.620252	S	1	0.0320019	0.0404786	5.87789	3.43504
CAACGATGTCATCCGG-1_1	NX1	Nx	08d	13594	4109	6.047	21.487	0.037	-0.142266	-0.598817	G1	2	0.0971621	0.257769	-3.38188	-0.0576796
CAACGGCGTACAGCGA-1_1	NX1	Nx	08d	14535	3843	5.731	21.692	0	-0.493686	-0.681687	G1	2	0.0971621	0.303249	-2.10065	-1.07802
CAACGGCGTCCAAGAG-1_1	NX1	Nx	08d	10629	3222	8.74	21.931	0.009	1.10218	0.0985069	S	4	0.0455568	0.0404786	-1.11971	1.46817
CAACGGCTCAATCAGC-1_1	NX1	Nx	08d	3588	1274	0	41.388	0	0.807537	0.462009	S	1	0.441542	0.0404786	4.59893	4.06832
CAAGACTAGTGATGGC-1_1	NX1	Nx	08d	10522	2929	6.044	26.288	0	-0.131057	-0.509375	G1	2	0.430188	0.0404786	-2.01532	0.135702
CAAGACTGTGGGCTTC-1_1	NX1	Nx	08d	16470	4391	5.464	22.999	0.03	-0.129019	1.26107	G2M	3	0.0239706	0.0404786	-2.67466	3.22293
CAAGACTGTTATAGAG-1_1	NX1	Nx	08d	19391	4579	6.89	23.532	0.031	0.139269	-0.550877	S	3	0.0239706	0.0404786	-3.82793	3.37121
CAAGAGGAGAGCTGAC-1_1	NX1	Nx	08d	11823	3256	3.442	26.364	0.025	-0.192956	-0.435098	G1	0	0.0544205	0.0404786	1.56534	-1.07215
CAAGAGGAGCTGAAAT-1_1	NX1	Nx	08d	11978	3491	9.868	20.93	0.017	0.874604	0.8217	S	4	0.0455568	0.0404786	-2.45205	0.829865
CAAGAGGAGGCGTTGA-1_1	NX1	Nx	08d	20625	2828	3.118	33.115	0.01	-0.28839	-0.331091	G1	7	0.0277228	0.177399	-8.06753	-6.45735
CAAGAGGTCGCCGAGT-1_1	NX1	Nx	08d	12981	3424	1.803	33.064	0.031	-0.257353	-0.535745	G1	2	0.0971621	0.0404786	-4.85328	-1.67136
CAAGAGGTCGGTGCAC-1_1	NX1	Nx	08d	29279	5691	5.072	26.063	0.027	0.0804614	0.560652	G2M	4	0.0455568	0.0404786	-0.232026	1.78422
CAAGCTACATTGCCTC-1_1	NX1	Nx	08d	13084	3613	5.297	21.171	0.008	-0.0645053	0.0944277	G2M	2	0.0971621	0.233633	-1.06298	-1.98441
CAAGCTAGTTGCATCA-1_1	NX1	Nx	08d	11710	3333	3.612	24.33	0.009	0.0187993	0.59973	G2M	4	0.0455568	0.0404786	-0.05516	2.807
CAAGGGAAGAGTCAGC-1_1	NX1	Nx	08d	10913	3280	6.689	23.871	0.009	-0.0549456	-0.431458	G1	5	0.0236857	0.205118	-11.8953	-4.49707
CAAGGGAAGGGCAATC-1_1	NX1	Nx	08d	10278	3066	5.789	24.596	0	0.247739	-0.463694	S	2	0.553806	0.135375	-3.05868	-0.748065
CAAGGGAAGGTAAGTT-1_1	NX1	Nx	08d	47278	5915	4.287	23.986	0.017	-0.0040427	-0.608746	G1	1	0.0320019	0.0404786	7.83056	4.64185
CAATACGCAAGTGGGT-1_1	NX1	Nx	08d	23898	5023	5.306	23.27	0.033	0.987898	-0.302089	S	0	0.0544205	0.0404786	4.71784	0.834855
CAATACGCAGTCGCTG-1_1	NX1	Nx	08d	32634	5771	5.534	19.112	0.012	0.305009	1.48937	G2M	1	0.0320019	0.0404786	3.65933	2.35772
CAATCGACAATGAACA-1_1	NX1	Nx	08d	17664	4371	5.729	22.696	0.011	0.142047	1.48145	G2M	2	0.0971621	0.135375	-0.783875	-2.24464
CAATCGACACAAAGCG-1_1	NX1	Nx	08d	26676	4828	5.597	29.735	0.019	1.10323	0.673615	S	3	0.0239706	0.177399	-3.57698	3.44052
CAATCGAGTGAGAACC-1_1	NX1	Nx	08d	10810	3434	7.086	20.999	0.028	-0.0469768	1.89305	G2M	2	0.0971621	0.0404786	-2.44485	-0.387897
CAATCGATCTGAGGTT-1_1	NX1	Nx	08d	10370	3037	3.095	29.518	0.01	0.0689734	-0.390131	S	2	0.0971621	0.374009	-2.06174	-3.61946
CAATGACAGATCCTAC-1_1	NX1	Nx	08d	33451	6128	4.478	17.491	0.021	0.49885	1.23198	G2M	3	0.0239706	0.0404786	-2.21722	4.9499
CAATGACAGTCCCAAT-1_1	NX1	Nx	08d	30238	6049	5.073	19.776	0.036	-0.270322	-0.75234	G1	2	0.0971621	0.0404786	-1.99569	-3.71893
CAATGACGTAATGATG-1_1	NX1	Nx	08d	25265	4855	6.06	16.157	0.032	-0.132847	-0.419333	G1	3	0.0239706	0.0404786	-0.6255	5.36685
CAATGACTCCGATAGT-1_1	NX1	Nx	08d	12311	3500	1.949	26.05	0	-0.111729	-0.501393	G1	0	0.526895	0.443753	-1.12156	-0.744145
CAATTTCAGCTCTGTA-1_1	NX1	Nx	08d	51143	7313	4.407	21.229	0.01	-0.00682819	0.559063	G2M	2	0.0971621	0.0404786	-2.41428	1.81455
CAATTTCAGGCTCAAG-1_1	NX1	Nx	08d	19291	4736	3.084	19.957	0.036	1.63124	-0.120374	S	2	0.0971621	0.135375	-4.98161	-2.08294
CAATTTCGTGGCATCC-1_1	NX1	Nx	08d	23250	5036	5.243	19.832	0.026	0.692284	0.524308	S	0	0.0544205	0.181218	5.02112	-0.670633
CACAACACAGGATGAC-1_1	NX1	Nx	08d	14856	3983	4.584	21.85	0.047	-0.300746	-0.591158	G1	1	0.0320019	0.0404786	1.46832	-2.63317
CACAACAGTGCACAAG-1_1	NX1	Nx	08d	23330	5188	5.401	17.004	0.039	1.3872	0.459848	S	2	0.0971621	0.0404786	-1.53611	-1.59937
CACAACATCGCTGTCT-1_1	NX1	Nx	08d	27855	5823	5.766	18.769	0.029	-0.138723	0.210283	G2M	0	0.0544205	0.0404786	0.0420365	-1.55875
CACAACATCTACTGCC-1_1	NX1	Nx	08d	15548	3970	4.232	20.852	0.039	-0.0357163	0.946467	G2M	0	0.0544205	0.0404786	-1.67993	2.85144
CACACAAAGAGTGGCT-1_1	NX1	Nx	08d	13231	3466	4.52	25.274	0.008	-0.461427	-0.608327	G1	4	0.0455568	0.0646147	0.723451	2.30291
CACACAACAGGACTTT-1_1	NX1	Nx	08d	73042	7956	4.612	28.956	0.027	0.527476	-0.180051	S	5	0.0236857	0.931585	-11.368	-4.2836
CACACAACAGTAGAGC-1_1	NX1	Nx	08d	26209	5461	5.536	20.127	0.023	0.658297	-0.50506	S	0	0.0544205	0.0404786	4.75491	-1.23715
CACACAACATAGAAAC-1_1	NX1	Nx	08d	8309	2311	1.276	31.147	0.024	0.00329093	-0.356614	S	1	0.0320019	0.0404786	4.41572	4.61866
CACACAAGTCCAGCCA-1_1	NX1	Nx	08d	28474	5546	4.899	19.221	0.018	0.0355914	1.80197	G2M	4	0.0455568	0.0404786	-0.713358	2.03001
CACACAATCGATTCCC-1_1	NX1	Nx	08d	16171	2628	3.599	14.037	0.012	-0.257719	-0.321164	G1	9	0	0.0404786	-7.64902	-9.43366
CACAGATAGTTTCGGT-1_1	NX1	Nx	08d	18881	4608	4.422	19.332	0.021	0.0776779	-0.594661	S	0	0.0544205	0.177399	-1.25456	2.99104
CACAGATGTAACACCT-1_1	NX1	Nx	08d	32833	6164	3.554	17.556	0.037	0.90215	1.00545	G2M	2	0.495382	0.205118	-2.81208	-0.192011
CACAGATGTAGAGACC-1_1	NX1	Nx	08d	14781	3992	6.312	23.111	0.014	0.189124	-0.552145	S	2	0.0971621	0.177399	-0.404804	-2.68986
CACAGATGTTATGGTC-1_1	NX1	Nx	08d	20934	4617	3.941	24.802	0.029	1.0663	0.91309	S	0	0.477416	0.0404786	-1.64746	-0.0655031
CACAGATTCTGGGTCG-1_1	NX1	Nx	08d	15860	4129	5.839	25.845	0.013	1.03239	0.614197	S	4	0.0455568	0.0404786	-1.63728	1.28407
CACAGATTCTTGTGCC-1_1	NX1	Nx	08d	42679	6628	3.772	22.069	0.014	1.22516	0.736646	S	0	0.0544205	0.0404786	1.84894	-1.99252
CACAGGCAGAGGACTC-1_1	NX1	Nx	08d	53172	6097	5.279	20.973	0.008	-0.463801	-0.537834	G1	1	0.0320019	0.0404786	6.55026	4.71294
CACAGGCCAAATCGTC-1_1	NX1	Nx	08d	12020	3086	5.915	27.529	0	-0.0264907	-0.490897	G1	0	0.446053	0.0404786	-1.55441	-0.695192
CACAGGCGTCGTAATC-1_1	NX1	Nx	08d	10027	2823	6.393	25.132	0.03	-0.141789	-0.256376	G1	0	0.0544205	0.567164	1.38085	-0.868775
CACAGGCTCCATCCGT-1_1	NX1	Nx	08d	19847	4852	4.56	24.19	0.05	0.890491	1.40661	G2M	2	0.562434	0.0404786	-4.3038	-0.224502
CACATGATCTTTGGAG-1_1	NX1	Nx	08d	30317	5160	5.258	26.124	0.003	0.74372	1.0021	G2M	3	0.0239706	0.0404786	-0.601242	4.75993
CACCAAAAGGTGCTGA-1_1	NX1	Nx	08d	22698	4934	4.282	22.438	0.031	0.475744	-0.445611	S	1	0.0320019	0.0404786	0.845947	-3.56231
CACCAAACACGAGGTA-1_1	NX1	Nx	08d	14341	3626	5.606	25.368	0	-0.0110283	0.122381	G2M	3	0.0239706	0.0404786	-3.10005	2.20174
CACCAAAGTAGCGCCT-1_1	NX1	Nx	08d	37924	5390	4.673	17.825	0.016	0.00628124	-0.596221	S	1	0.0320019	0.0404786	4.2627	5.42058
CACCAAAGTTGGGTAG-1_1	NX1	Nx	08d	54540	7012	4.452	20.953	0.013	0.533171	0.719819	G2M	1	0.0320019	0.0404786	5.26128	4.94957
CACCGTTAGTACGAGC-1_1	NX1	Nx	08d	41620	6183	5.031	23.801	0.019	0.653735	1.41655	G2M	0	0.0544205	0.0404786	4.63428	-0.611544
CACCGTTGTGGCAGAT-1_1	NX1	Nx	08d	20603	4803	5.742	21.177	0.029	0.194515	1.79834	G2M	2	0.0971621	0.0404786	-0.741652	-2.40753
CACCGTTTCATCGTAG-1_1	NX1	Nx	08d	18803	4423	3.164	22.06	0.005	-0.420706	-0.619451	G1	4	0.0455568	0.0404786	0.18749	1.38053
CACCGTTTCGCGAAGA-1_1	NX1	Nx	08d	12019	3505	5.666	24.653	0.042	-0.145294	-0.378425	G1	2	0.0971621	0.0404786	0.154914	-3.97066
CACGAATGTTGGAGAC-1_1	NX1	Nx	08d	13226	3685	4.99	23.174	0.023	-0.548763	-0.5437	G1	2	0.0971621	0.0404786	-0.977169	-2.96208
CACGAATTCCCGTAAA-1_1	NX1	Nx	08d	14158	3969	3.313	25.124	0.021	-0.330599	-0.71199	G1	2	0.0971621	0.0646147	-2.91084	-2.99294
CACGGGTGTTATGGTC-1_1	NX1	Nx	08d	41641	6132	3.059	22.833	0.029	1.1748	0.985787	S	6	0	0.0646147	-1.5844	-13.7197
CACGGGTGTTGGACCC-1_1	NX1	Nx	08d	64331	6898	1.851	20.284	0.016	-0.364146	-0.682016	G1	1	0.0320019	0.0404786	7.63235	4.87892
CACGGGTTCTGCTGAA-1_1	NX1	Nx	08d	12579	2814	0.334	44.089	0.024	-0.0703468	0.449359	G2M	7	0.0277228	0.233633	-7.06431	-7.2404
CACGTGGCAAATGGCG-1_1	NX1	Nx	08d	33629	5956	4.609	26.492	0.024	0.288343	-0.550875	S	0	0.0544205	0.374009	3.6234	-1.8153
CACGTTCAGAAGCGAA-1_1	NX1	Nx	08d	13425	3693	3.516	24.648	0.022	-0.0177101	1.21788	G2M	0	0.0544205	0.219316	1.26957	1.40716
CACGTTCAGATAGCAT-1_1	NX1	Nx	08d	17491	4213	3.265	24.778	0.023	0.451528	-0.36627	S	0	0.0544205	0.0404786	-1.56771	-0.273244
CACGTTCCAATCTGCA-1_1	NX1	Nx	08d	27456	5510	4.356	19.588	0.036	1.05839	-0.313671	S	0	0.0544205	0.0404786	4.39527	-0.846339
CACGTTCGTCCTGTTC-1_1	NX1	Nx	08d	15361	3863	6.217	24.725	0.026	-0.072835	-0.54539	G1	2	0.0971621	0.0404786	-1.9691	-0.402624
CACGTTCTCCGCTAGG-1_1	NX1	Nx	08d	20231	4818	3.944	18.951	0.015	-0.0408698	-0.269353	G1	0	0.0544205	0.0404786	-1.72412	2.1328
CACGTTCTCCTTGACC-1_1	NX1	Nx	08d	21362	5019	2.046	22.676	0.023	-0.324116	-0.501692	G1	2	0.0971621	0.205118	-4.76539	-2.51447
CACTAAGAGTAGTCCT-1_1	NX1	Nx	08d	9346	3060	8.324	21.474	0.043	-0.270684	-0.26316	G1	5	0.0236857	0.205118	-11.8082	-4.34473
CACTAAGAGTTGTCAC-1_1	NX1	Nx	08d	17371	4148	5.561	24.034	0.012	0.270896	0.957847	G2M	0	0.0544205	0.0404786	1.0871	1.90281
CACTAAGCAACAAAGT-1_1	NX1	Nx	08d	20915	4750	4.341	21.611	0.024	-0.278695	-0.620607	G1	0	0.0544205	0.931585	0.683786	0.37594
CACTAAGGTCCGAAGA-1_1	NX1	Nx	08d	25084	4868	6.809	23.015	0.012	0.0311866	-0.696361	S	1	0.0320019	0.0404786	3.14113	4.28594
CACTAAGGTCCGGACT-1_1	NX1	Nx	08d	17742	4547	4.751	20.003	0.028	0.0462764	-0.0114264	S	3	0.0239706	0.0404786	-3.51102	3.10067
CACTAAGGTTGCGGAA-1_1	NX1	Nx	08d	19295	2636	2.12	35.196	0.005	-0.33828	-0.236831	G1	7	0.0277228	0.177399	-7.87637	-6.69683
CACTAAGTCTGCATGA-1_1	NX1	Nx	08d	18197	4496	6.518	20.811	0.016	1.11359	-0.0408373	S	4	0.0455568	0.0404786	-2.75699	0.676201
CACTAAGTCTGCCCTA-1_1	NX1	Nx	08d	33799	5955	2.707	19.864	0.021	1.06642	0.415695	S	6	0	0.0646147	-1.48792	-13.5312
CACTGAAAGAAGGGAT-1_1	NX1	Nx	08d	16725	4339	3.007	25.686	0.012	0.381734	1.3774	G2M	0	0.0544205	0.0404786	-2.01269	2.65778
CACTGAAAGCATGCAG-1_1	NX1	Nx	08d	19697	4638	4.727	20.272	0.02	0.684159	0.772963	G2M	0	0.0544205	0.0404786	0.483775	-0.776538
CACTGAAAGTTCTACG-1_1	NX1	Nx	08d	12646	3566	4.926	22.054	0.032	-0.190026	-0.564131	G1	2	0.0971621	0.0404786	-2.99057	-1.54165
CACTGAATCAAGAAAC-1_1	NX1	Nx	08d	16427	4095	6.246	23.498	0	0.00774018	-0.629488	S	2	0.0971621	0.135375	-1.07817	-3.11625
CACTGGGAGCCTCATA-1_1	NX1	Nx	08d	25788	5230	6.166	22.569	0.012	-0.305078	-0.139226	G1	0	0.0544205	0.0646147	-1.842	2.48171
CACTGTCCAATGGCAG-1_1	NX1	Nx	08d	26109	4987	4.002	29.277	0.015	0.214649	-0.447319	S	5	0.0236857	0.0646147	-12.0756	-4.39282
CACTGTCCACTTGACA-1_1	NX1	Nx	08d	31806	6169	5.229	16.208	0.019	0.665204	-0.496685	S	1	0.0320019	0.0404786	0.302088	-3.99278
CACTGTCTCCATCACC-1_1	NX1	Nx	08d	8682	2792	6.991	20.191	0.012	-0.119651	0.568295	G2M	0	0.0544205	0.0404786	2.40571	0.747892
CACTGTCTCTCTTGCG-1_1	NX1	Nx	08d	66225	7976	4.149	20.038	0.041	1.07544	0.812535	S	4	0.0455568	0.0404786	-0.0568863	1.79942
CACTTCGCACTTCCTG-1_1	NX1	Nx	08d	30951	5888	4.181	20.277	0.026	0.505171	1.48312	G2M	0	0.0544205	0.0404786	0.0759498	-2.02165
CACTTCGGTAGTTACC-1_1	NX1	Nx	08d	26415	5108	3.702	20.534	0.011	1.24627	0.560313	S	1	0.0320019	0.0404786	5.01226	2.53876
CAGAGCCAGGGTCTTT-1_1	NX1	Nx	08d	10266	3267	2.971	23.68	0.088	0.0582922	-0.58064	S	2	0.0971621	0.443753	-3.58929	-0.946624
CAGAGCCCACCGTGAC-1_1	NX1	Nx	08d	11538	3413	4.836	23.73	0.017	-0.469234	-0.574046	G1	0	0.0544205	0.0404786	0.0403792	0.77679
CAGAGCCCAGAGTCTT-1_1	NX1	Nx	08d	37464	6066	4.903	22.646	0.043	0.881734	0.305224	S	4	0.0455568	0.0404786	1.02781	1.72053
CAGAGCCTCACTGATG-1_1	NX1	Nx	08d	22535	4539	3.781	26.084	0.013	-0.186108	-0.53415	G1	5	0.0236857	0.0404786	-10.9243	-4.27207
CAGAGCCTCGTCCATC-1_1	NX1	Nx	08d	4200	1765	6	28.429	0.024	-0.223289	-0.357424	G1	5	0.0236857	0.0404786	-9.89141	-4.18661
CAGATACAGTCATAGA-1_1	NX1	Nx	08d	15621	3975	4.686	24.23	0.006	-0.0646579	-0.650086	G1	2	0.0971621	0.0404786	-2.29187	-0.464613
CAGATACAGTGCCTCG-1_1	NX1	Nx	08d	13050	3479	6.46	25.985	0.038	-0.145403	-0.574127	G1	4	0.0455568	0.0404786	-2.03284	1.89311
CAGATACCAATAACCC-1_1	NX1	Nx	08d	35674	6383	3.311	20.755	0.02	0.50778	1.5891	G2M	5	0.0236857	0.135375	-10.118	-4.2626
CAGATACCAATCCTAG-1_1	NX1	Nx	08d	17841	4306	4.714	21.72	0.017	-0.192683	-0.637104	G1	2	0.0971621	0.0404786	0.651643	-3.43015
CAGATACCAGATTCGT-1_1	NX1	Nx	08d	17048	4075	4.974	28.789	0.023	-0.342616	-0.688904	G1	0	0.0544205	0.0404786	1.20701	0.18434
CAGATACCATCGGCCA-1_1	NX1	Nx	08d	45517	6152	4.532	16.794	0.015	-0.052057	-0.626073	G1	1	0.0320019	0.0404786	6.75021	3.81924
CAGATACTCACCGCTT-1_1	NX1	Nx	08d	15814	4310	4.218	18.654	0.051	1.53833	1.20954	S	2	0.0971621	0.177399	-0.730747	-4.05332
CAGATACTCCTTCTAA-1_1	NX1	Nx	08d	39773	6048	3.382	19.83	0.018	-0.237821	-0.682534	G1	1	0.0320019	0.0404786	5.63078	5.01211
CAGATCAAGTTCATGC-1_1	NX1	Nx	08d	37245	6468	4.983	17.106	0.024	-0.428732	-0.6173	G1	0	0.0544205	0.106191	2.77179	-0.786388
CAGATTGAGCACCAGA-1_1	NX1	Nx	08d	30436	6021	5.119	18.143	0.023	0.630282	1.45011	G2M	2	0.0971621	0.0404786	-1.96531	-0.985986
CAGCAATAGATGGGCT-1_1	NX1	Nx	08d	10586	3220	4.799	24.277	0.038	-0.220663	0.191091	G2M	2	0.0971621	0.0404786	0.632964	-3.61493
CAGCAATAGTATTGCC-1_1	NX1	Nx	08d	25906	5241	5.003	24.025	0.046	-0.0587392	-0.722841	G1	0	0.0544205	0.0404786	1.68116	0.763108
CAGCAATCACGACGAA-1_1	NX1	Nx	08d	33532	5892	4.101	20.893	0.018	0.73896	0.513354	S	1	0.0320019	0.0404786	5.45363	4.90124
CAGCAATCAGGATCTT-1_1	NX1	Nx	08d	14401	3819	5.215	25.339	0.014	-0.323829	-0.56402	G1	2	0.0971621	0.0646147	-2.80391	0.316394
CAGCAATGTCCAACGC-1_1	NX1	Nx	08d	14023	3512	6.004	21.921	0.014	0.107972	0.424671	G2M	9	0	0.0404786	-7.41718	-9.73182
CAGCAATGTGTAACGG-1_1	NX1	Nx	08d	23383	5299	3.314	16.773	0.034	0.132701	1.63792	G2M	5	0.0236857	0.0404786	-11.2708	-4.67843
CAGCACGGTAATGCTC-1_1	NX1	Nx	08d	14610	4131	5.51	18.344	0.082	-0.539326	-0.655706	G1	2	0.0971621	0.0461496	-1.59592	-3.07164
CAGCACGTCAACACGT-1_1	NX1	Nx	08d	90429	8320	3.863	15.614	0.034	0.503111	1.2746	G2M	1	0.0320019	0.0404786	5.00428	2.09511
CAGCACGTCCAGTTCC-1_1	NX1	Nx	08d	18825	4489	4.552	26.39	0.027	0.922251	-0.280561	S	2	0.0971621	0.0404786	-2.33966	-3.20541
CAGCAGCAGAGCTGCA-1_1	NX1	Nx	08d	23976	5078	5.118	21.859	0.017	1.39499	0.810751	S	0	0.43339	0.0404786	-2.11785	0.0764704
CAGCAGCCACGTACTA-1_1	NX1	Nx	08d	22509	5174	4.389	20.849	0.022	0.532542	0.894158	G2M	0	0.0544205	0.106191	-1.5438	3.21475
CAGCAGCGTTCCGCGA-1_1	NX1	Nx	08d	43313	6051	5.017	17.267	0.03	1.04712	0.190632	S	1	0.0320019	0.0461496	6.18696	3.3763
CAGCAGCTCAGCTGTA-1_1	NX1	Nx	08d	62587	7775	5.96	22.517	0.026	0.159808	1.59339	G2M	0	0.0544205	0.148556	3.37847	-1.51824
CAGCAGCTCTCTGCTG-1_1	NX1	Nx	08d	27081	5260	5.111	18.544	0.037	0.56895	0.897104	G2M	1	0.0320019	0.0404786	3.12752	3.52343
CAGCCAGAGTAGTCAA-1_1	NX1	Nx	08d	5520	1786	0.308	26.268	0.018	0.0351224	1.31873	G2M	1	0.0320019	0.0404786	4.04021	5.03555
CAGCCAGCAAGGTACG-1_1	NX1	Nx	08d	22281	4264	2.145	31.722	0.013	0.143669	-0.472889	S	8	0	0.181218	5.67227	-9.62921
CAGCCAGCAGACATCT-1_1	NX1	Nx	08d	55770	7039	3.24	21.737	0.022	-0.349826	-0.63882	G1	1	0.0320019	0.0404786	4.67529	4.49941
CAGCCAGCATAAGCAA-1_1	NX1	Nx	08d	22339	3704	5.296	40.637	0.004	-0.0289087	-0.515985	G1	6	0	0.0404786	0.411705	-13.47
CAGCCAGGTCCATACA-1_1	NX1	Nx	08d	28100	5664	5.014	20.819	0.014	0.345494	-0.837181	S	0	0.0544205	0.0404786	4.43158	-0.513447
CAGCCAGGTGATATAG-1_1	NX1	Nx	08d	13966	3612	6.036	22.698	0.014	-0.108768	-0.590587	G1	2	0.0971621	0.0404786	-0.470873	-2.3779
CAGCCAGTCCATGATG-1_1	NX1	Nx	08d	25510	4930	6.382	24.771	0.016	0.317246	-0.6095	S	3	0.0239706	0.0404786	-1.85996	5.05866
CAGCCAGTCGTCTCAC-1_1	NX1	Nx	08d	30054	5101	4.545	21.807	0.01	0.0687083	-0.44674	S	1	0.0320019	0.0404786	3.16223	5.26449
CAGCGTGAGGCCTTCG-1_1	NX1	Nx	08d	27337	5111	2.542	25.548	0.015	0.490584	1.6476	G2M	0	0.0544205	0.0404786	3.89222	-0.136378
CAGCGTGAGGGTCAAC-1_1	NX1	Nx	08d	19338	4268	5.642	27.692	0.021	0.0704326	-0.338566	S	3	0.0239706	0.106191	-1.99711	3.97883
CAGCGTGGTTGTGTTG-1_1	NX1	Nx	08d	17527	4052	5.728	23.644	0.011	0.148319	0.0222545	S	0	0.0544205	0.0404786	2.36904	1.48048
CAGGCCAAGCCGATAG-1_1	NX1	Nx	08d	15795	3971	4.501	26.521	0.006	-0.200321	-0.535009	G1	0	0.0544205	0.0404786	2.55401	-0.30925
CAGGCCACACCGTCGA-1_1	NX1	Nx	08d	14285	3978	5.621	23.248	0.021	0.927641	-0.527445	S	2	0.0971621	0.0404786	-3.88209	-1.01857
CAGGTATAGAGATTCA-1_1	NX1	Nx	08d	10983	3256	6.665	23.819	0.018	-0.171058	-0.586186	G1	4	0.0455568	0.0404786	-1.60522	0.981767
CAGGTATAGCACTGGA-1_1	NX1	Nx	08d	11048	3226	6.046	23.814	0.045	-0.386021	-0.681461	G1	3	0.0239706	0.106191	-2.88469	3.56892
CAGGTATAGTATCTGC-1_1	NX1	Nx	08d	32230	5756	4.738	14.39	0.022	0.0779362	0.898824	G2M	1	0.0320019	0.0404786	2.29516	5.03209
CAGGTATCAACAGATA-1_1	NX1	Nx	08d	25233	4846	4.799	25.399	0.008	1.0391	0.332735	S	4	0.0455568	0.0404786	0.177491	2.03758
CAGGTATGTATATGGA-1_1	NX1	Nx	08d	23592	3865	0.576	29.04	0.008	0.402564	1.50125	G2M	7	0.0277228	0.233633	-7.872	-6.69614
CAGTGCGCAAGAATGT-1_1	NX1	Nx	08d	13119	3354	4.596	29.171	0.03	-0.322651	-0.445403	G1	5	0.0236857	0.0404786	-12.4482	-4.7966
CAGTGCGTCCTACACC-1_1	NX1	Nx	08d	14340	3848	4.365	26.018	0.042	0.836994	-0.191907	S	3	0.0239706	0.28906	-3.95975	2.49511
CAGTTAGCATTCAGCA-1_1	NX1	Nx	08d	39294	6591	3.235	17.942	0.018	0.0613286	1.65279	G2M	4	0.0455568	0.218419	-0.365449	1.39155
CAGTTAGGTAAGACCG-1_1	NX1	Nx	08d	4399	1487	0.091	32.416	0	-0.223483	-0.280229	G1	1	0.0320019	0.0404786	4.62271	4.1317
CAGTTAGGTTATAGCC-1_1	NX1	Nx	08d	37516	5830	5.771	21.255	0.035	0.129335	-0.445407	S	1	0.0320019	0.0404786	5.91731	3.12186
CAGTTCCAGAGGATCC-1_1	NX1	Nx	08d	34360	5999	4.546	21.705	0.035	0.512586	1.52193	G2M	4	0.0455568	0.0404786	0.111145	1.74408
CAGTTCCAGCGCTGAA-1_1	NX1	Nx	08d	18517	4786	5.12	20.349	0.038	0.624311	-0.291055	S	2	0.0971621	0.0404786	-1.36849	-3.41061
CAGTTCCAGCTAGAGC-1_1	NX1	Nx	08d	15378	3897	5.976	23.735	0.033	0.438188	-0.487206	S	0	0.0544205	0.0404786	-1.02024	-0.529015
CAGTTCCGTACCTTCC-1_1	NX1	Nx	08d	29922	6043	3.897	21.272	0.027	0.188064	1.78094	G2M	0	0.0544205	0.0404786	-2.61111	1.30807
CATAAGCAGGCTAGCA-1_1	NX1	Nx	08d	13000	3528	5.092	26.985	0.046	-0.345901	-0.587031	G1	2	0.0971621	0.0646147	-2.89004	-2.79093
CATAAGCGTGTAGTGG-1_1	NX1	Nx	08d	8964	2874	4.362	25.558	0.011	-0.268357	-0.287296	G1	0	0.0544205	0.0404786	-1.83745	2.41281
CATAAGCTCCACTGGG-1_1	NX1	Nx	08d	32693	5997	5.09	20.741	0.028	0.227306	1.46355	G2M	0	0.0544205	0.0404786	1.45915	0.0769613
CATAAGCTCGTGGGTC-1_1	NX1	Nx	08d	15659	4247	5.607	24.746	0.026	0.488019	1.54946	G2M	2	0.0971621	0.0646147	-3.90345	-1.64913
CATACAGAGTCTGCGC-1_1	NX1	Nx	08d	23958	5191	5.334	22.093	0.038	1.56025	0.172815	S	0	0.0544205	0.0404786	1.35341	-1.97904
CATACAGCAACCTATG-1_1	NX1	Nx	08d	19697	4436	2.61	26.639	0.041	0.707948	-0.385643	S	2	0.495382	0.181218	-3.01627	-0.249779
CATACAGCAGCAGTAG-1_1	NX1	Nx	08d	38441	5317	2.588	30.101	0.005	0.992178	0.969695	S	6	0	0.0404786	0.730678	-13.3233
CATACCCAGCAATTCC-1_1	NX1	Nx	08d	16859	4234	3.79	25.867	0.036	-0.149546	-0.503216	G1	2	0.541832	0.0404786	0.253873	-2.09893
CATACCCCACGACTAT-1_1	NX1	Nx	08d	20694	4717	3.339	26.549	0.039	1.0451	1.2046	G2M	2	0.0971621	0.0404786	-2.9938	-0.881749
CATACCCGTCAAAGAT-1_1	NX1	Nx	08d	18927	4423	3.783	22.275	0.026	0.296225	-0.380897	S	0	0.0544205	0.0404786	2.52392	0.888656
CATACCCTCACTTCTA-1_1	NX1	Nx	08d	22502	4972	4.715	26.273	0.009	1.44484	0.657341	S	3	0.0239706	0.0404786	-4.55325	1.57931
CATACCCTCTACACAG-1_1	NX1	Nx	08d	25131	5144	3.179	21.607	0.032	1.08836	0.464169	S	0	0.0544205	0.0404786	0.719079	0.283712
CATACTTAGCATTGTC-1_1	NX1	Nx	08d	18953	4723	5.857	19.232	0.042	-0.239389	-0.52234	G1	2	0.0971621	0.0404786	-0.478321	-2.31004
CATACTTAGTCTCTGA-1_1	NX1	Nx	08d	17837	4449	4.737	19.858	0.028	1.12663	0.400865	S	4	0.0455568	0.0404786	-1.86851	0.363781
CATACTTCAAGATCCT-1_1	NX1	Nx	08d	70907	7425	2.771	15.924	0.028	-0.283508	-0.59929	G1	1	0.0320019	0.0404786	7.65636	4.49377
CATACTTCACAGAGCA-1_1	NX1	Nx	08d	13244	3604	5.874	25.43	0.03	-0.256943	-0.536442	G1	4	0.0455568	0.0404786	-2.03305	1.27574
CATACTTCATACCAGT-1_1	NX1	Nx	08d	37463	5790	2.416	16.969	0	-0.266006	-0.781956	G1	1	0.0320019	0.0404786	4.97645	4.76256
CATACTTTCGTTGCCT-1_1	NX1	Nx	08d	20288	4614	4.436	20.662	0.015	0.543905	-0.0903683	S	4	0.0455568	0.0404786	-0.193583	2.32389
CATAGACAGTTGGACG-1_1	NX1	Nx	08d	53529	7116	6.099	22.003	0.028	0.0874141	1.8625	G2M	0	0.0544205	0.0404786	-0.358476	0.247526
CATAGACCAGGATGAC-1_1	NX1	Nx	08d	11516	3526	5.401	21.318	0.017	0.2026	-0.277257	S	2	0.0971621	0.0404786	-2.41278	-0.691597
CATAGACGTACGTGAG-1_1	NX1	Nx	08d	33188	5709	7.186	21.484	0.012	0.382131	1.3559	G2M	1	0.0320019	0.0404786	3.10658	5.48943
CATAGACGTCGTTGGC-1_1	NX1	Nx	08d	34918	6173	3.511	24.658	0.043	0.523247	-0.679029	S	0	0.0544205	0.303249	1.68249	0.334512
CATCAAGGTTTCACAG-1_1	NX1	Nx	08d	22461	4791	1.763	23.694	0.022	1.23281	1.00258	S	0	0.0544205	0.218419	0.517174	-0.312242
CATCAAGTCTTGCGCT-1_1	NX1	Nx	08d	30878	5779	5.548	22.097	0.032	0.492621	0.961524	G2M	4	0.0455568	0.0404786	-1.46245	1.76231
CATCCACCATCTTCGC-1_1	NX1	Nx	08d	16229	4501	4.443	16.39	0.043	-0.110354	0.710866	G2M	2	0.0971621	0.0404786	-1.55551	-2.27129
CATCCACGTCAGCTTA-1_1	NX1	Nx	08d	13716	3954	4.003	19.714	0.015	0.379766	0.488524	G2M	2	0.0971621	0.205118	-3.15892	-0.240674
CATCCACTCCCTCAAC-1_1	NX1	Nx	08d	21039	4915	1.992	21.251	0.014	-0.0676286	-0.609423	G1	5	0.0236857	0.0404786	-12.0265	-4.52732
CATCCACTCCGCTTAC-1_1	NX1	Nx	08d	14531	4079	5.051	23.061	0.007	0.0277726	-0.498616	S	2	0.0971621	0.233633	-2.43506	-2.36845
CATCCACTCGCACTCT-1_1	NX1	Nx	08d	26966	5247	4.747	20.759	0.015	1.39273	0.098872	S	3	0.0239706	0.0404786	-1.12456	4.68426
CATCCACTCGGCTGTG-1_1	NX1	Nx	08d	11599	3218	4.88	30.149	0	-0.131685	-0.521919	G1	3	0.0239706	0.0404786	-4.54532	2.74376
CATCCCAAGCCTGAAG-1_1	NX1	Nx	08d	17026	4498	6.296	17.926	0.018	-0.161532	-0.729464	G1	2	0.0971621	0.0404786	-0.958477	-4.18109
CATCCCAAGCTTTCCC-1_1	NX1	Nx	08d	13344	3566	3.62	26.034	0.037	-0.050616	-0.571554	G1	2	0.0971621	0.177399	-0.592255	-1.76749
CATCCCAAGTGTAGAT-1_1	NX1	Nx	08d	53747	6719	4.384	17.915	0.019	0.213321	0.627006	G2M	1	0.0320019	0.931585	7.76527	4.5105
CATCCCATCACCCTCA-1_1	NX1	Nx	08d	18570	4848	4.782	19.946	0.027	-0.169919	-0.821842	G1	3	0.0239706	0.0404786	-4.96371	2.01
CATCCGTCACGATAGG-1_1	NX1	Nx	08d	21272	4685	3.582	22.772	0.014	0.881248	1.10004	G2M	3	0.0239706	0.0646147	-3.74983	3.25671
CATCCGTGTAACTTCG-1_1	NX1	Nx	08d	59025	6644	4.352	21.97	0.017	-0.285114	-0.631917	G1	1	0.0320019	0.0404786	6.90366	4.97004
CATCCGTGTTGAGAGC-1_1	NX1	Nx	08d	24727	4548	3.713	23.666	0.012	0.125657	0.240453	G2M	1	0.0320019	0.0646147	6.23888	3.40104
CATCCGTTCACCTTGC-1_1	NX1	Nx	08d	22727	4731	4.277	25.498	0.031	-0.0386171	0.155458	G2M	0	0.0544205	0.0404786	3.86833	-0.654168
CATCCGTTCCTACGAA-1_1	NX1	Nx	08d	13785	4029	5.23	17.94	0.022	-0.0680895	0.537495	G2M	2	0.0971621	0.205118	-2.41158	-1.47829
CATCGCTGTTTGCAGT-1_1	NX1	Nx	08d	19943	4513	5.074	22.479	0.015	0.52186	1.99004	G2M	0	0.446053	0.0404786	-0.787537	-1.70658
CATCGCTTCTATACTC-1_1	NX1	Nx	08d	40193	6557	5.165	16.68	0.015	0.21744	-0.619452	S	9	0	0.0404786	-7.65178	-9.40574
CATCGGGCAAGTTCGT-1_1	NX1	Nx	08d	27728	4713	5.871	19.486	0.018	-0.342408	-0.632959	G1	1	0.0320019	0.0404786	7.54339	4.81919
CATCGTCAGTGATCGG-1_1	NX1	Nx	08d	29277	5120	3.153	28.148	0.017	1.10932	0.672687	S	6	0	0.135375	0.0738986	-13.5023
CATCGTCCACTGTCGG-1_1	NX1	Nx	08d	32028	5586	3.681	29.374	0.028	0.949984	-0.387539	S	3	0.0239706	0.177399	-2.72637	3.28026
CATGAGTAGGACAGTC-1_1	NX1	Nx	08d	5988	1945	0.334	33.2	0	0.164282	0.561833	G2M	1	0.441542	0.0404786	4.69136	4.01123
CATGAGTAGGCCTAAG-1_1	NX1	Nx	08d	24703	5391	5.53	21.613	0.049	0.140125	1.50044	G2M	2	0.0971621	0.0404786	-1.407	-2.74824
CATGAGTCATAGTCGT-1_1	NX1	Nx	08d	13756	3581	2.966	25.443	0.022	-0.106863	-0.519803	G1	1	0.0320019	0.0404786	1.58509	-3.06029
CATGAGTCATCGGTTA-1_1	NX1	Nx	08d	26171	5058	4.646	21.929	0.023	0.24689	0.320397	G2M	0	0.0544205	0.0404786	4.81117	-1.27181
CATGAGTTCCTTCGAC-1_1	NX1	Nx	08d	22213	5217	3.435	21.267	0.014	1.25828	0.953895	S	0	0.0544205	0.0404786	-0.179987	-1.08021
CATGCAAAGCCGAATG-1_1	NX1	Nx	08d	34655	6267	3.336	24.031	0.043	0.637897	-0.639026	S	3	0.0239706	0.443753	-4.39871	1.65418
CATGCAACACTGGACC-1_1	NX1	Nx	08d	23603	4578	1.415	25.014	0.008	-0.440398	-0.695322	G1	8	0	0.0404786	5.86356	-9.65119
CATGCAATCGGCTTGG-1_1	NX1	Nx	08d	10882	3361	1.461	25.308	0.046	-0.148266	1.21155	G2M	2	0.0971621	0.181218	-3.52143	-0.980285
CATGCCTGTGTCATCA-1_1	NX1	Nx	08d	19927	4547	6.795	19.958	0.03	0.98804	0.928418	S	4	0.0455568	0.0404786	-0.494411	1.2694
CATGCCTTCTGGTGCG-1_1	NX1	Nx	08d	32762	6160	3.855	19.3	0.012	-0.125903	-0.766793	G1	0	0.0544205	0.0404786	1.24409	0.00294684
CATGCGGAGCGATGAC-1_1	NX1	Nx	08d	7736	2139	1.81	3.568	0.013	-0.213755	-0.174846	G1	9	0	0.0404786	-7.66818	-8.5346
CATGCGGCAATCGCAT-1_1	NX1	Nx	08d	20907	4214	7.337	27.57	0.01	-0.0569464	-0.287568	G1	5	0.0236857	0.0404786	-11.9639	-4.28273
CATGCGGCACAGTGAG-1_1	NX1	Nx	08d	24961	4808	4.018	20.143	0.008	1.12797	0.223207	S	1	0.592208	0.0404786	-6.20591	-6.83606
CATGCTCGTCCAGCAC-1_1	NX1	Nx	08d	13617	3689	4.465	23.764	0.029	-0.511195	-0.629593	G1	0	0.0544205	0.0404786	-1.43441	2.75959
CATGCTCTCAGCTTCC-1_1	NX1	Nx	08d	13722	2793	2.594	30.017	0.007	-0.190523	-0.188203	G1	7	0.0277228	0.0404786	-7.94677	-6.62386
CATGGATCATAATGAG-1_1	NX1	Nx	08d	23458	5034	4.058	24.908	0.017	-0.26596	0.497335	G2M	3	0.0239706	0.205118	-3.08249	2.50112
CATGGATGTATCTCTT-1_1	NX1	Nx	08d	21571	2892	1.164	21.042	0.005	-0.260932	-0.342552	G1	7	0.0277228	0.0404786	-8.2771	-6.16405
CATGGTACACACGGTC-1_1	NX1	Nx	08d	38262	6312	4.231	24.933	0.018	1.00814	1.22927	G2M	5	0.0236857	0.177399	-12.4059	-4.62519
CATGGTACATTGGATC-1_1	NX1	Nx	08d	18038	4328	4.058	23.927	0.033	0.34249	-0.463706	S	0	0.0544205	0.106191	0.986693	1.94643
CATGGTAGTCAAAGTA-1_1	NX1	Nx	08d	16605	3064	2.09	38.675	0.018	0.393834	-0.15284	S	7	0.0277228	0.181218	-7.36643	-7.14227
CATGGTAGTTGAGAGC-1_1	NX1	Nx	08d	10866	3231	6.387	20.928	0	1.07877	-0.0241745	S	4	0.0455568	0.0404786	-0.083441	2.24307
CATGGTATCTGTCAGA-1_1	NX1	Nx	08d	11583	3360	4.403	28.412	0.026	-0.13779	-0.465778	G1	0	0.0544205	0.0404786	-1.96254	1.81091
CATTCATTCCCTTGTG-1_1	NX1	Nx	08d	16553	4472	5.594	18.565	0.036	-0.242264	-0.732691	G1	0	0.0544205	0.0404786	-0.738774	-0.0374974
CATTCCGAGCCTAACT-1_1	NX1	Nx	08d	13422	3715	2.608	23.901	0.03	-0.418371	-0.491402	G1	2	0.0971621	0.28906	-2.11924	-3.01985
CATTCCGCACGAGGAT-1_1	NX1	Nx	08d	25481	3035	2.967	34.732	0.02	-0.243885	-0.415124	G1	7	0.0277228	0.233633	-7.88484	-6.69841
CATTCCGTCATGGATC-1_1	NX1	Nx	08d	20112	4949	4.187	18.417	0.01	-0.478245	-0.645002	G1	4	0.0455568	0.0404786	-0.876343	1.70539
CATTCCGTCCATCAGA-1_1	NX1	Nx	08d	16644	3675	3.25	20.554	0	-0.458274	-0.35908	G1	9	0	0.198377	-7.53811	-9.57807
CATTCTATCTAACGGT-1_1	NX1	Nx	08d	16001	4220	5.762	22.992	0.05	-0.0987806	-0.591742	G1	5	0.0236857	0.233633	-10.9383	-4.67046
CATTCTATCTGGTGGC-1_1	NX1	Nx	08d	20803	4814	4.586	18.988	0.034	-0.431883	-0.338443	G1	0	0.0544205	0.0404786	2.33633	0.13712
CATTGAGCAGCGCGTT-1_1	NX1	Nx	08d	34266	5928	4.95	16.538	0.009	0.517393	1.09737	G2M	1	0.0320019	0.0404786	2.32743	5.08455
CATTGAGCAGTTGTTG-1_1	NX1	Nx	08d	27234	5551	5.989	21.862	0.015	0.138175	1.75643	G2M	1	0.0320019	0.0404786	3.19506	2.11359
CATTGAGTCCCTTCCC-1_1	NX1	Nx	08d	7529	2503	1.594	27.826	0.04	-0.0613966	-0.52116	G1	2	0.0971621	0.636908	-0.175923	-3.19405
CATTGAGTCTCGCGTT-1_1	NX1	Nx	08d	20648	3975	4.194	31.436	0.01	-0.190374	-0.440516	G1	5	0.0236857	0.205118	-12.3795	-4.51824
CATTGCCCAGCGTATT-1_1	NX1	Nx	08d	31927	5908	5.246	17.919	0.038	1.04225	-0.107899	S	1	0.0320019	0.0404786	2.87115	5.21094
CATTGCCGTCCAAGAG-1_1	NX1	Nx	08d	30285	5601	3.649	16.83	0.017	0.904492	-0.0427018	S	1	0.0320019	0.0404786	6.06403	5.02179
CATTGCCGTTGTTGTG-1_1	NX1	Nx	08d	25561	4887	5.548	27.331	0.02	-0.0606643	-0.505504	G1	1	0.0320019	0.233633	4.98931	4.74602
CATTGCCTCCGTAGTA-1_1	NX1	Nx	08d	47100	4941	2.418	31.985	0.002	0.0362024	0.776911	G2M	7	0.0277228	0.233633	-8.06082	-6.44683
CATTGCCTCTAGCATG-1_1	NX1	Nx	08d	15949	4545	4.734	18.528	0.031	-0.20176	-0.415626	G1	5	0.0236857	0.0404786	-11.7223	-4.57427
CATTGTTTCGGTCTAA-1_1	NX1	Nx	08d	23956	5085	5.66	16.53	0.033	-0.644682	-0.698298	G1	1	0.0320019	0.0404786	2.03992	4.53129
CATTTCAAGAACAAGG-1_1	NX1	Nx	08d	16505	3985	5.453	26.035	0.055	-0.271268	-0.532521	G1	1	0.0320019	0.233633	1.45832	-2.53002
CATTTCACAAAGAGTT-1_1	NX1	Nx	08d	24767	4873	4.954	24.056	0.008	0.299942	0.528027	G2M	1	0.0320019	0.0404786	4.67131	5.00941
CATTTCACACTTTATC-1_1	NX1	Nx	08d	18847	4528	4.494	25.702	0.021	-0.0175256	-0.544556	G1	3	0.0239706	0.0404786	-3.98594	3.64862
CATTTCAGTTAACAGA-1_1	NX1	Nx	08d	17167	4284	2.79	25.887	0.006	0.857932	-0.48572	S	2	0.0971621	0.205118	-3.75018	-2.85232
CCAAGCGCAGATCACT-1_1	NX1	Nx	08d	17459	4394	2.154	23.375	0.011	0.852018	-0.524813	S	2	0.430188	0.0404786	-0.820299	0.786719
CCAAGCGGTACGAGTG-1_1	NX1	Nx	08d	13195	3739	5.047	23.744	0.03	-0.153949	-0.436848	G1	2	0.474064	0.0404786	-1.2824	0.0375077
CCAAGCGGTCCGAAAG-1_1	NX1	Nx	08d	12613	3325	5.851	26.354	0.008	-0.273935	-0.226429	G1	2	0.0971621	0.0404786	0.738557	-3.53933
CCAAGCGTCAGTGGGA-1_1	NX1	Nx	08d	9755	2876	4.757	26.663	0.021	-0.144575	-0.368832	G1	4	0.0455568	0.0404786	-1.48058	2.12451
CCAAGCGTCCTTCGAC-1_1	NX1	Nx	08d	19935	4451	4.123	24.981	0.02	0.955069	0.832203	S	0	0.0544205	0.110069	4.17006	-1.01021
CCAATGAAGCTCCCTT-1_1	NX1	Nx	08d	20815	5135	5.597	15.739	0.024	-0.274067	-0.645102	G1	0	0.0544205	0.0404786	0.178654	-1.55171
CCAATTTGTAGACGGT-1_1	NX1	Nx	08d	12271	3472	6.079	23.209	0.016	-0.413435	-0.514938	G1	0	0.0544205	0.233633	-0.482406	0.736922
CCAATTTGTCGCTTAA-1_1	NX1	Nx	08d	31164	5944	4.297	17.626	0.013	0.352166	1.67339	G2M	4	0.0455568	0.0404786	-0.916341	1.86394
CCACAAACATCCTGTC-1_1	NX1	Nx	08d	14579	4122	5.597	20.173	0.021	-0.312426	-0.64133	G1	2	0.0971621	0.0404786	-2.07629	-3.45436
CCACAAAGTAAGCTCT-1_1	NX1	Nx	08d	14729	4075	2.512	19.472	0.014	-0.0172902	-0.423733	G1	2	0.0971621	0.443753	-4.23039	-1.82141
CCACAAAGTAGCGTAG-1_1	NX1	Nx	08d	14174	3667	4.854	22.598	0	-0.0461581	-0.689429	G1	1	0.0320019	0.0404786	3.07714	2.73385
CCACAAATCACGGACC-1_1	NX1	Nx	08d	18071	4348	3.746	22.91	0.028	0.832247	-0.343673	S	4	0.0455568	0.110069	-1.7286	1.80819
CCACAAATCATTCTTG-1_1	NX1	Nx	08d	9301	2713	7.118	24.094	0.011	-0.251971	-0.386782	G1	9	0	0.0404786	-7.4795	-9.66726
CCACAAATCATTGTGG-1_1	NX1	Nx	08d	40647	6374	4.997	16.518	0.027	0.0715379	-0.676098	S	1	0.0320019	0.0404786	3.03628	4.82881
CCACACTCACAGCGCT-1_1	NX1	Nx	08d	19475	3211	2.942	31.579	0.005	1.32578	0.837771	S	7	0.0277228	0.233633	-7.75294	-6.85654
CCACACTCACGTAGAG-1_1	NX1	Nx	08d	19607	4346	5.376	25.175	0.01	-0.0959753	-0.0839348	G1	4	0.0455568	0.0404786	-0.207465	2.74627
CCACACTTCATGGTAC-1_1	NX1	Nx	08d	19671	4291	3.513	28.356	0.025	-0.233306	-0.52304	G1	0	0.0544205	0.0404786	1.38624	-1.46628
CCACACTTCCTACAAG-1_1	NX1	Nx	08d	19562	4842	3.369	18.127	0.015	0.63378	1.34521	G2M	2	0.0971621	0.0404786	-0.741267	-2.87359
CCACACTTCCTCTTTC-1_1	NX1	Nx	08d	24504	5517	4.273	17.422	0.033	-0.0545976	0.255231	G2M	2	0.0971621	0.0404786	-3.35454	-0.35692
CCACCATAGAGTATAC-1_1	NX1	Nx	08d	16756	4233	4.757	23.508	0.03	-0.192648	0.515487	G2M	3	0.0239706	0.0404786	-2.70373	3.24213
CCACCATAGATACAGT-1_1	NX1	Nx	08d	42138	6265	4.034	23.278	0.005	1.21143	0.682403	S	6	0	0.181218	-1.17762	-13.3034
CCACCATAGTACGAGC-1_1	NX1	Nx	08d	14784	3638	5.154	22.179	0.034	-0.497116	-0.621811	G1	1	0.0320019	0.0404786	0.687656	-3.79055
CCACCATTCACAACCA-1_1	NX1	Nx	08d	34346	6465	4.912	17.568	0.035	0.905097	1.31468	G2M	2	0.0971621	0.0404786	-0.847862	-2.83456
CCACGAGAGCTACTAC-1_1	NX1	Nx	08d	15172	2680	1.575	30.695	0	-0.379915	-0.254366	G1	7	0.0277228	0.177399	-8.03492	-6.47405
CCACGAGAGGCTTAAA-1_1	NX1	Nx	08d	16193	4238	5.113	21.88	0.019	0.133069	-0.65555	S	2	0.0971621	0.198377	-2.51129	-2.4383
CCACGAGTCAGCTAGT-1_1	NX1	Nx	08d	13716	3798	5.3	24.701	0.015	1.28273	-0.216342	S	3	0.0239706	0.233633	-4.19073	2.71425
CCACGAGTCTTCACGC-1_1	NX1	Nx	08d	39918	5972	4.196	20.119	0.02	-0.332046	-0.619865	G1	1	0.0320019	0.0404786	5.27524	4.59265
CCACGTTAGGTCTGGA-1_1	NX1	Nx	08d	11956	3575	5.688	21.261	0.017	0.500537	-0.329805	S	5	0.0236857	0.0404786	-12.1931	-4.56435
CCACGTTTCGATACAC-1_1	NX1	Nx	08d	25275	5233	4.281	18.421	0.02	-0.392418	-0.560557	G1	2	0.0971621	0.0404786	0.230908	-2.77036
CCACGTTTCTCCTGTG-1_1	NX1	Nx	08d	35731	4169	2.04	38.997	0.006	0.301384	0.700485	G2M	7	0.0277228	0.233633	-7.53411	-7.06588
CCACTTGAGCCTGACC-1_1	NX1	Nx	08d	20452	4670	3.3	22.013	0.034	-0.13783	0.333726	G2M	3	0.0239706	0.0404786	-1.613	3.82944
CCACTTGCAGTACTAC-1_1	NX1	Nx	08d	70316	7806	2.765	24.987	0.024	0.845	0.480087	S	5	0.0236857	0.218419	-12.6079	-4.73949
CCACTTGGTGTCACAT-1_1	NX1	Nx	08d	33536	6277	3.942	23.196	0.027	0.0809459	-0.792977	S	0	0.0544205	0.443753	0.971543	-1.46786
CCATAAGCAGAACTAA-1_1	NX1	Nx	08d	17049	3977	5.138	24.301	0.029	-0.122632	0.26796	G2M	0	0.0544205	0.0404786	1.81844	-0.317387
CCATCACCACTGCTTC-1_1	NX1	Nx	08d	25458	5349	4.344	19.279	0.016	0.699273	-0.524455	S	0	0.0544205	0.0404786	-0.972265	2.60688
CCATCACGTATGGTTC-1_1	NX1	Nx	08d	30607	5770	2.918	21.854	0.007	0.515843	1.04796	G2M	0	0.0544205	0.0404786	3.38065	-0.478063
CCCAACTAGCTCCCTT-1_1	NX1	Nx	08d	41702	6899	3.503	18.855	0.036	-0.246033	-0.827345	G1	0	0.0544205	0.0551106	0.151774	-1.37365
CCCATTGAGCAAATCA-1_1	NX1	Nx	08d	43701	6840	4.176	20.421	0.018	0.735298	-0.62863	S	0	0.0544205	0.0404786	1.05003	-1.23478
CCCATTGGTATTTCGG-1_1	NX1	Nx	08d	34632	5851	4.455	18.821	0.026	0.055006	1.24974	G2M	1	0.0320019	0.0404786	3.08176	4.66534
CCCATTGGTTTCCATT-1_1	NX1	Nx	08d	22444	4907	4.095	19.555	0.022	0.853139	0.408758	S	0	0.0544205	0.0404786	4.23417	-0.83322
CCCATTGTCTTACTGT-1_1	NX1	Nx	08d	39616	5853	2.532	24.775	0.015	1.27899	0.365157	S	6	0	0.181218	-1.42505	-13.5415
CCCGAAGCAACCGCTG-1_1	NX1	Nx	08d	27249	4894	3.2	17.692	0.011	-0.427642	-0.363511	G1	1	0.0320019	0.0404786	6.86971	5.13548
CCCGAAGGTTTGGGAG-1_1	NX1	Nx	08d	27482	5439	5.855	23.477	0.036	-0.131959	-0.701262	G1	0	0.0544205	0.0404786	0.191585	-0.627991
CCCGAAGTCCCGATCT-1_1	NX1	Nx	08d	42925	6367	3.592	20.617	0.016	0.448861	1.70892	G2M	0	0.0544205	0.0404786	4.99405	0.0619023
CCCGGAAGTCGCAGTC-1_1	NX1	Nx	08d	14797	3690	4.197	26.553	0.02	0.322485	1.26481	G2M	2	0.0971621	0.0404786	0.463178	-3.44691
CCCTAACCATAGCTGT-1_1	NX1	Nx	08d	21244	4874	4.265	18.32	0	-0.121059	-0.534229	G1	0	0.0544205	0.0404786	0.290824	-1.51732
CCCTAACGTCATAGTC-1_1	NX1	Nx	08d	29872	5652	4.901	20.588	0.007	0.454195	1.83468	G2M	3	0.0239706	0.0404786	-4.53347	1.09014
CCCTAACTCGCTTTAT-1_1	NX1	Nx	08d	10686	3303	3.631	22.413	0.037	-0.415647	-0.376974	G1	2	0.0971621	0.135375	-4.1471	-2.73824
CCCTCAAAGAGCATAT-1_1	NX1	Nx	08d	30367	5807	5.545	22.827	0.03	1.12992	0.916422	S	0	0.0544205	0.0404786	3.61574	-0.628593
CCCTCAAAGCACCGAA-1_1	NX1	Nx	08d	33552	5255	5.454	26.651	0.012	0.310772	1.75827	G2M	9	0	0.0404786	-7.47407	-9.68794
CCCTCAAGTATCAAGA-1_1	NX1	Nx	08d	8358	2948	2.955	24.168	0.012	-0.0200299	1.14969	G2M	2	0.0971621	0.0404786	-4.56315	-1.00653
CCCTCTCCAGACCATT-1_1	NX1	Nx	08d	19610	4551	4.131	28.021	0.02	-0.156727	-0.373257	G1	5	0.0236857	0.177399	-12.2851	-4.46048
CCCTGATCAGGGTTGA-1_1	NX1	Nx	08d	72812	8175	4.269	22.741	0.026	0.266573	-0.366782	S	0	0.0544205	0.931585	2.71807	-0.202998
CCCTGATCATCCTTGC-1_1	NX1	Nx	08d	19109	4469	4.344	21.325	0.026	0.488758	0.548971	G2M	0	0.0544205	0.0404786	4.58534	-1.74997
CCCTGATCATTGGATC-1_1	NX1	Nx	08d	69391	8430	6.257	19.91	0.035	0.33867	0.475749	G2M	5	0.0236857	0.0404786	-11.4638	-4.4834
CCCTGATTCCACCTGT-1_1	NX1	Nx	08d	12128	3554	3.282	23.804	0.016	-0.223281	-0.438809	G1	2	0.0971621	0.0404786	-1.21975	-3.45334
CCCTGATTCGCACGGT-1_1	NX1	Nx	08d	25188	5197	6.011	18.672	0.012	0.666511	1.34617	G2M	0	0.0544205	0.0404786	0.934214	-0.640112
CCCTTAGCAAGTCGTT-1_1	NX1	Nx	08d	17768	4243	5.611	25.63	0.039	0.359786	2.05783	G2M	2	0.0971621	0.0404786	-2.93135	-0.55606
CCCTTAGGTAGCTGTT-1_1	NX1	Nx	08d	16929	4287	5.151	18.524	0.03	-0.0747424	-0.585977	G1	0	0.0544205	0.621286	0.556437	-0.91995
CCCTTAGGTAGTGGCA-1_1	NX1	Nx	08d	33663	5604	3.286	19.633	0.012	-0.215062	-0.605347	G1	1	0.0320019	0.0404786	5.06976	4.80733
CCCTTAGGTGATACCT-1_1	NX1	Nx	08d	36495	5566	3.518	23.836	0.014	-0.0762265	-0.580892	G1	1	0.0320019	0.0646147	6.43514	3.54615
CCGAACGAGCCTCTGG-1_1	NX1	Nx	08d	7832	2807	7.291	22.485	0.026	0.627397	-0.402425	S	5	0.0236857	0.0404786	-10.5373	-4.26875
CCGATCTGTCCACTCT-1_1	NX1	Nx	08d	76033	8238	4.411	20.966	0.026	0.342735	0.63378	G2M	0	0.0544205	0.0404786	4.50689	-1.31515
CCGATCTTCTCCATAT-1_1	NX1	Nx	08d	25386	4542	4.928	31.962	0.016	1.23332	0.281676	S	6	0	0.0404786	0.694098	-13.3209
CCGATGGAGTTGTCGT-1_1	NX1	Nx	08d	24099	5045	6.552	17.997	0.008	0.13425	0.166674	G2M	1	0.0320019	0.0404786	5.96496	2.91987
CCGATGGCATCGAACT-1_1	NX1	Nx	08d	54834	7343	3.447	23.325	0.013	0.124044	0.98777	G2M	0	0.0544205	0.258879	2.75528	-2.28433
CCGATGGTCCAAACCA-1_1	NX1	Nx	08d	25723	5273	5.015	22.369	0.035	0.777314	-0.405117	S	0	0.0544205	0.0404786	3.91696	-1.95343
CCGATGGTCGCCGATG-1_1	NX1	Nx	08d	17064	4349	3.452	20.839	0.018	0.757665	-0.400757	S	3	0.0239706	0.344825	-2.19051	3.12218
CCGCAAGCACAAATGA-1_1	NX1	Nx	08d	47468	6785	4.133	16.327	0.015	-0.139751	1.5474	G2M	1	0.0320019	0.0404786	3.73367	4.01992
CCGCAAGGTTGCTCGG-1_1	NX1	Nx	08d	17347	4089	5.038	27.244	0.04	1.40475	-0.23968	S	4	0.0455568	0.177399	-2.06639	1.42949
CCGCAAGTCGAGGCAA-1_1	NX1	Nx	08d	20954	4569	5.942	24.215	0.024	0.0104528	-0.823089	S	0	0.0544205	0.0646147	1.26255	-0.724663
CCGCAAGTCGATACTG-1_1	NX1	Nx	08d	32928	5849	3.456	22.145	0.012	0.0982562	-0.528104	S	1	0.0320019	0.0404786	6.90825	5.10974
CCGCAAGTCGCCAACG-1_1	NX1	Nx	08d	15817	3868	6.082	24.139	0.038	0.0732579	0.0137481	S	0	0.0544205	0.0646147	4.7689	-0.966571
CCGGACAAGTGCTCGC-1_1	NX1	Nx	08d	14217	3792	5.05	24.858	0.021	-0.180471	-0.674123	G1	0	0.0544205	0.303249	0.623339	-1.42735
CCGGGTACAAGCGAGT-1_1	NX1	Nx	08d	21584	4617	6.889	24.319	0.032	0.00262588	-0.470827	S	5	0.0236857	0.0404786	-10.5257	-4.0503
CCGGGTACAGGCGATA-1_1	NX1	Nx	08d	13336	3733	4.702	24.16	0.007	-0.286903	-0.0821272	G1	0	0.0544205	0.0404786	3.28542	-2.30104
CCGGGTAGTTAGGCTT-1_1	NX1	Nx	08d	19231	4463	4.659	24.211	0.005	0.578073	0.97146	G2M	2	0.0971621	0.0404786	-0.327681	-2.45986
CCGGGTAGTTCATCTT-1_1	NX1	Nx	08d	17600	4571	5.892	16.267	0.057	-0.173301	1.43589	G2M	1	0.0320019	0.0404786	1.66321	5.24491
CCGGGTATCTCCTGTG-1_1	NX1	Nx	08d	27798	5739	5.026	21.516	0.018	-0.09598	0.524386	G2M	0	0.348904	0.0404786	-2.16621	3.48144
CCGGTAGCAATACGAA-1_1	NX1	Nx	08d	13090	3541	6.188	27.349	0.015	-0.241234	-0.402209	G1	2	0.0971621	0.0404786	-1.05003	-3.5201
CCGGTAGTCCATCACC-1_1	NX1	Nx	08d	14702	4089	4.714	22.092	0.007	-0.167214	-0.514231	G1	2	0.0971621	0.233633	-1.48749	-2.99642
CCGGTGAGTCTACGTA-1_1	NX1	Nx	08d	14787	3779	5.383	26.219	0.014	0.197608	0.892797	G2M	3	0.0239706	0.0404786	-2.68666	3.27531
CCGGTGAGTCTGCAAT-1_1	NX1	Nx	08d	29785	5720	5.849	21.225	0.037	1.12977	0.403136	S	0	0.0544205	0.0404786	2.98883	-0.407108
CCGGTGAGTGACCGAA-1_1	NX1	Nx	08d	19315	4632	7.435	23.893	0.036	1.16559	0.768354	S	3	0.0239706	0.443753	-3.56759	3.48219
CCGGTGATCGGTCTAA-1_1	NX1	Nx	08d	35126	6241	5.623	19.84	0.034	0.456315	1.30849	G2M	5	0.0236857	0.0404786	-12.0434	-4.89038
CCGTAGGAGATGCTAA-1_1	NX1	Nx	08d	12821	3734	5.678	21.566	0	0.00421292	-0.390019	S	2	0.0971621	0.0404786	-2.15179	-3.42
CCGTAGGGTAGGTCAG-1_1	NX1	Nx	08d	31269	5682	4.413	21.609	0.019	0.935425	0.983269	G2M	0	0.0544205	0.0404786	4.84759	-0.126102
CCGTAGGTCCTACCAC-1_1	NX1	Nx	08d	28431	5235	2.786	19.44	0.018	-0.10892	0.428272	G2M	1	0.0320019	0.0404786	6.07109	3.56043
CCGTGAGCATCGATAC-1_1	NX1	Nx	08d	28068	4747	2.441	22.83	0.014	0.0616729	-0.726436	S	1	0.0320019	0.0404786	4.96515	4.81596
CCGTGAGTCACTAGCA-1_1	NX1	Nx	08d	15153	3761	3.702	29.262	0.007	-0.224813	-0.575353	G1	0	0.0544205	0.0404786	-2.62217	1.35052
CCGTTCAAGATAGTGT-1_1	NX1	Nx	08d	13834	3608	5.168	27.729	0.007	-0.22781	-0.301963	G1	4	0.0455568	0.205118	-0.274979	2.3323
CCTAACCCATCATCTT-1_1	NX1	Nx	08d	16985	4445	4.863	21.272	0.018	0.0216382	-0.0820814	S	3	0.0239706	0.0404786	-3.26266	3.75697
CCTAACCGTCGCAGTC-1_1	NX1	Nx	08d	15562	4154	2.872	22.189	0.013	0.303035	-0.368211	S	0	0.0544205	0.250573	-1.90318	3.10597
CCTAAGAAGGTTCTTG-1_1	NX1	Nx	08d	20629	5091	5.652	20.394	0.039	0.483037	-0.246979	S	5	0.0236857	0.0404786	-11.4378	-4.5977
CCTAAGACATAATCGC-1_1	NX1	Nx	08d	44678	6949	4.083	14.253	0.029	0.913818	1.66781	G2M	5	0.0236857	0.177399	-11.1625	-4.7038
CCTAAGATCAACACCA-1_1	NX1	Nx	08d	15280	4016	5.105	24.908	0.033	0.122366	-0.278878	S	3	0.0239706	0.0646147	-4.16061	3.71995
CCTAAGATCGGTCGGT-1_1	NX1	Nx	08d	17708	4239	5.099	20.025	0.017	0.816248	-0.370308	S	0	0.0544205	0.0404786	5.13313	1.29229
CCTACGTCACGCAGTC-1_1	NX1	Nx	08d	31862	5638	4.858	17.833	0.013	0.252148	1.25257	G2M	0	0.0544205	0.0404786	4.82723	0.864067
CCTACGTCAGTCAGAG-1_1	NX1	Nx	08d	31580	5790	5.377	22.79	0.019	-0.343179	-0.35645	G1	3	0.0239706	0.181218	-2.05402	4.04171
CCTACGTTCCTAACAG-1_1	NX1	Nx	08d	52218	7405	3.677	19.622	0.042	0.0849534	-0.951707	S	0	0.0544205	0.0404786	4.01879	-2.10486
CCTATCGCAGCTGTGC-1_1	NX1	Nx	08d	10704	3251	3.999	27.289	0.009	0.191801	-0.652018	S	3	0.0239706	0.0404786	-4.4406	1.92763
CCTATCGGTGTTTGCA-1_1	NX1	Nx	08d	41582	6637	3.778	20.783	0.034	0.581245	1.73157	G2M	5	0.0236857	0.177399	-12.1585	-4.62019
CCTATCGTCCTTCTAA-1_1	NX1	Nx	08d	77243	8145	3.656	20.579	0.021	0.381669	1.07186	G2M	5	0.0236857	0.177399	-10.9717	-4.05809
CCTATCGTCGTTGTGA-1_1	NX1	Nx	08d	15047	4213	3.722	22.024	0.027	-0.181009	-0.587829	G1	2	0.0971621	0.0404786	-3.25151	-0.419941
CCTCAACCATGTGCCG-1_1	NX1	Nx	08d	18690	4692	7.523	17.774	0.027	0.558675	-0.65552	S	2	0.0971621	0.0404786	-0.727774	-2.57488
CCTCAACTCAGACCTA-1_1	NX1	Nx	08d	36868	5782	2.509	26.253	0.019	0.612259	1.74229	G2M	5	0.0236857	0.135375	-11.5367	-4.68834
CCTCAACTCAGCGCAC-1_1	NX1	Nx	08d	30538	5928	3.474	20.682	0.029	0.420539	1.67345	G2M	0	0.0544205	0.0404786	-0.374196	0.439705
CCTCACAAGCACGTCC-1_1	NX1	Nx	08d	19596	4720	3.98	21.316	0.026	-0.298095	-0.576436	G1	1	0.0320019	0.0404786	1.0463	-2.78753
CCTCACATCATAGACC-1_1	NX1	Nx	08d	25984	5319	4.106	20.039	0.027	0.501353	-0.576511	S	1	0.0320019	0.0404786	1.64638	5.05941
CCTCAGTAGAGGTATT-1_1	NX1	Nx	08d	15001	3868	3.786	23.932	0.02	0.374683	0.74894	G2M	0	0.0544205	0.0646147	3.10572	-2.27619
CCTCAGTAGCGTTGTT-1_1	NX1	Nx	08d	13160	3748	5.805	20.41	0.015	1.00779	0.0882216	S	0	0.477416	0.177399	-1.68364	-0.0596937
CCTCAGTAGTAAGGGA-1_1	NX1	Nx	08d	22813	4475	3.156	18.209	0	-0.227483	-0.635602	G1	1	0.0320019	0.0404786	4.73841	4.60427
CCTCAGTGTGAGTTGG-1_1	NX1	Nx	08d	16171	4257	6.165	19.368	0.012	-0.246332	-0.529088	G1	0	0.0544205	0.0404786	1.87586	-1.11878
CCTCAGTTCAAGTAAG-1_1	NX1	Nx	08d	30539	5785	4.155	17.27	0.003	1.18968	0.519974	S	1	0.0320019	0.0404786	4.68975	3.88356
CCTCATGCAGCCTTCT-1_1	NX1	Nx	08d	46878	6217	2.594	18.235	0.023	-0.253073	-0.689606	G1	1	0.0320019	0.0404786	7.35533	4.51834
CCTCATGCATACAGAA-1_1	NX1	Nx	08d	32454	5534	4.261	27.879	0.031	0.0153631	-0.253887	S	5	0.0236857	0.135375	-12.4904	-4.82839
CCTCATGGTACCTTCC-1_1	NX1	Nx	08d	27814	5527	4.735	18.056	0.011	0.768837	1.06202	G2M	0	0.43339	0.0404786	-1.15666	-0.467917
CCTCATGTCAGGTAAA-1_1	NX1	Nx	08d	24680	5437	4.279	19.473	0.036	0.207249	2.0934	G2M	0	0.0544205	0.0404786	3.08193	-2.00772
CCTCCAACAGAGACTG-1_1	NX1	Nx	08d	20536	4866	4.28	17.783	0.015	0.476564	1.10707	G2M	3	0.0239706	0.0404786	-1.69516	4.42109
CCTCCAAGTTTAGAGA-1_1	NX1	Nx	08d	34553	6175	2.338	20.95	0.026	1.04256	0.0532606	S	2	0.0971621	0.0404786	-4.80322	-1.44573
CCTCCTCAGAGTTGTA-1_1	NX1	Nx	08d	25012	4740	5.369	19.822	0.02	-0.11542	-0.624156	G1	1	0.0320019	0.0551106	4.93701	4.71758
CCTCCTCCAACTCCAA-1_1	NX1	Nx	08d	23109	5245	3.912	17.781	0.017	0.00204616	-0.709078	S	2	0.0971621	0.0404786	-0.949453	-3.11743
CCTCCTCCATAGGCGA-1_1	NX1	Nx	08d	46402	6184	4.56	19.954	0.028	-0.428437	-0.624281	G1	1	0.0320019	0.177399	4.46904	4.54389
CCTCCTCGTCACTAGT-1_1	NX1	Nx	08d	35517	6061	3.776	18.374	0.028	1.25616	0.366682	S	1	0.498708	0.0404786	1.0821	5.04364
CCTCCTCTCGTTAGAC-1_1	NX1	Nx	08d	49110	6619	3.466	22.342	0.014	0.947168	1.23375	G2M	6	0	0.0646147	-0.801549	-13.2495
CCTCTAGAGAGTTGAT-1_1	NX1	Nx	08d	8064	2352	4.812	35.082	0.037	-0.335892	-0.389994	G1	3	0.0239706	0.205118	-3.50247	3.3615
CCTCTAGCACCGCTAG-1_1	NX1	Nx	08d	27767	5370	3.994	24.065	0.011	1.09846	0.831195	S	0	0.0544205	0.0404786	3.21506	-0.864957
CCTCTAGCACTGTGTA-1_1	NX1	Nx	08d	19584	4509	4.31	21.395	0	0.935358	-0.45341	S	0	0.0544205	0.0404786	2.43265	0.778448
CCTCTAGCAGAGACTG-1_1	NX1	Nx	08d	13155	3737	4.865	22.326	0.03	-0.120076	-0.551798	G1	0	0.0544205	0.148556	3.58403	-2.12284
CCTCTCCAGAATCGCG-1_1	NX1	Nx	08d	23117	4805	4.079	24.592	0.013	0.846727	0.99489	G2M	0	0.0544205	0.0404786	4.30931	0.050703
CCTCTCCCAGGTTACT-1_1	NX1	Nx	08d	18112	4676	5.786	17.966	0.022	0.93644	1.701	G2M	2	0.0971621	0.0404786	-0.711439	-3.05418
CCTCTCCGTAGTTCCA-1_1	NX1	Nx	08d	12685	3819	4.147	21.655	0.024	-0.0346828	1.87742	G2M	2	0.0971621	0.0404786	-2.66022	-0.488823
CCTGCATAGGTACAAT-1_1	NX1	Nx	08d	27377	5326	6.462	22.687	0.029	1.39586	-0.125136	S	0	0.482653	0.0404786	2.24049	-0.935771
CCTGCATGTATGCTAC-1_1	NX1	Nx	08d	7041	1939	2.471	9.573	0.014	-0.325904	-0.26167	G1	9	0	0.0404786	-7.60414	-8.92689
CCTGTTGGTAGGCTGA-1_1	NX1	Nx	08d	12607	3470	8.567	22.821	0.04	-0.218275	-0.71528	G1	2	0.0971621	0.233633	-1.86513	-2.83409
CCTGTTGGTATTGACC-1_1	NX1	Nx	08d	13033	3609	5.287	23.655	0.015	-0.229327	-0.676526	G1	2	0.0971621	0.0404786	0.287662	-3.33026
CCTGTTGTCCGATGTA-1_1	NX1	Nx	08d	29286	5300	3.281	25.75	0.014	0.81036	1.156	G2M	6	0	0.0646147	-0.663163	-13.2993
CCTTCAGCAAGCGCTC-1_1	NX1	Nx	08d	39374	6522	4.561	22.528	0.036	0.334484	1.71174	G2M	5	0.0236857	0.0404786	-11.934	-4.34973
CCTTCAGCACGTAGAG-1_1	NX1	Nx	08d	10582	3117	4.432	27.207	0.009	-0.163158	-0.465272	G1	2	0.0971621	0.443753	-4.74264	-1.75117
CCTTCAGCATGCACTA-1_1	NX1	Nx	08d	34597	6429	4.078	17.559	0.04	1.06673	0.869544	S	0	0.43339	0.0404786	-0.587553	-1.706
CCTTCAGGTCATGGCC-1_1	NX1	Nx	08d	28088	5488	4.461	19.211	0.028	-0.350433	-0.571618	G1	1	0.0320019	0.0646147	2.67834	4.33824
CCTTCAGTCCACTTTA-1_1	NX1	Nx	08d	12831	3796	4.255	26.109	0.031	-0.485609	-0.487081	G1	3	0.0239706	0.0404786	-4.75579	1.79021
CCTTGTGAGAGGCGTT-1_1	NX1	Nx	08d	13703	3707	6.955	25.33	0.022	-0.162428	-0.0823268	G1	0	0.0544205	0.0404786	1.25115	1.81246
CCTTGTGGTTACACAC-1_1	NX1	Nx	08d	26043	4800	3.222	33.794	0.008	0.0327341	-0.472423	S	5	0.0236857	0.181218	-9.38125	-4.26827
CCTTTGGAGATGGCAC-1_1	NX1	Nx	08d	13357	3631	6.109	26.787	0.022	-0.422251	-0.548374	G1	0	0.0544205	0.181218	-1.99855	0.971591
CCTTTGGAGGGCAATC-1_1	NX1	Nx	08d	18215	4341	5.863	25.034	0.011	0.159288	1.43466	G2M	5	0.0236857	0.0404786	-10.8579	-4.05432
CCTTTGGCACAACATC-1_1	NX1	Nx	08d	18500	4496	4.649	19.843	0.016	0.740676	-0.47708	S	4	0.0455568	0.0404786	-1.37579	1.43971
CCTTTGGCACATTCGA-1_1	NX1	Nx	08d	15559	4256	2.828	20.368	0.013	0.0154911	1.53759	G2M	0	0.0544205	0.0404786	-0.81724	2.73348
CCTTTGGCACCAGTTA-1_1	NX1	Nx	08d	57094	7148	2.044	17.189	0.033	0.368144	1.06147	G2M	1	0.0320019	0.0404786	6.61998	3.70859
CGAAGGAAGAGGGCGA-1_1	NX1	Nx	08d	20101	4315	2.806	26.238	0.005	0.106779	-0.333358	S	5	0.0236857	0.205118	-12.3723	-4.63726
CGAAGGAAGAGTTCGG-1_1	NX1	Nx	08d	6971	2606	2.553	22.551	0.043	-0.301412	-0.486525	G1	2	0.0971621	0.181218	-4.95326	-2.61407
CGAAGGAGTTCTCCAC-1_1	NX1	Nx	08d	25575	5151	4.735	20.829	0.027	0.641719	0.783748	G2M	0	0.477416	0.0404786	-1.89103	0.846832
CGAAGGAGTTGACTGT-1_1	NX1	Nx	08d	12347	3368	8.026	23.463	0.008	-0.0473943	-0.255279	G1	3	0.0239706	0.0404786	-2.90345	2.11762
CGAAGGATCTGGCCGA-1_1	NX1	Nx	08d	17176	4104	4.471	25.512	0	0.520933	1.57559	G2M	2	0.0971621	0.0404786	-1.52392	-1.31314
CGAAGTTAGTTCCGTA-1_1	NX1	Nx	08d	15896	4156	5.58	22.314	0.025	-0.313235	0.397504	G2M	4	0.0455568	0.0404786	0.194933	2.8534
CGAAGTTCAATGTCTG-1_1	NX1	Nx	08d	25235	4910	3.079	29.736	0.016	-0.126905	-0.514548	G1	5	0.0236857	0.0646147	-12.4274	-4.66251
CGAATTGAGATCCAAA-1_1	NX1	Nx	08d	19434	4609	2.861	21.488	0.026	0.581202	0.828698	G2M	0	0.477416	0.205118	-1.79567	0.189347
CGAATTGAGTATGAGT-1_1	NX1	Nx	08d	17031	4425	4.169	20.733	0.023	0.904962	-0.0951141	S	0	0.0544205	0.0404786	-0.412963	1.22366
CGAATTGCAGATTTCG-1_1	NX1	Nx	08d	19344	4639	3.665	18.135	0.021	-0.0139604	0.900386	G2M	1	0.0320019	0.0404786	3.55153	5.11725
CGACAGCCATGATAGA-1_1	NX1	Nx	08d	19015	4695	5.264	22.672	0.037	0.121427	-0.452055	S	3	0.0239706	0.180829	-2.26132	3.83631
CGAGAAGAGATACAGT-1_1	NX1	Nx	08d	14816	3720	4.772	25.25	0.013	0.0396263	0.308523	G2M	0	0.0544205	0.0404786	2.26003	1.43436
CGAGAAGAGTCGCTAT-1_1	NX1	Nx	08d	13886	3669	8.094	24.687	0.029	-0.304261	-0.340842	G1	5	0.0236857	0.0404786	-10.9185	-4.16127
CGAGAAGTCTAGTGTG-1_1	NX1	Nx	08d	32485	4865	2.709	27.366	0.012	-0.228677	-0.473512	G1	1	0.0320019	0.0404786	6.25425	4.59314
CGAGGAACACAGAGAC-1_1	NX1	Nx	08d	29353	5482	4.296	20.683	0.017	0.0323208	1.5485	G2M	0	0.0544205	0.0404786	-1.37732	2.91707
CGAGGAACAGTCGCTG-1_1	NX1	Nx	08d	20926	4588	5.075	23.645	0.043	0.474885	1.57895	G2M	0	0.477416	0.0646147	-2.0633	0.31414
CGAGGAATCACTCGAA-1_1	NX1	Nx	08d	32216	5218	3.225	23.706	0.028	1.0552	0.554853	S	0	0.0544205	0.0404786	4.09719	1.03831
CGAGGCTCATTCTCTA-1_1	NX1	Nx	08d	16349	4252	4.967	22.931	0.043	-0.274928	0.878036	G2M	0	0.0544205	0.0404786	1.63192	1.53177
CGAGGCTTCTTCTTCC-1_1	NX1	Nx	08d	16532	4128	5.002	22.617	0.03	-0.164305	0.148324	G2M	3	0.587025	0.0404786	-3.07134	1.11411
CGAGTGCAGGAACGAA-1_1	NX1	Nx	08d	16484	4072	5.163	24.393	0.006	-0.333404	-0.600928	G1	0	0.0544205	0.250573	0.517397	0.663165
CGAGTGCAGTCCCAAT-1_1	NX1	Nx	08d	22226	4841	5.399	18.73	0.036	0.260953	-0.666893	S	1	0.0320019	0.0404786	1.79664	5.20253
CGAGTGCTCATTACGG-1_1	NX1	Nx	08d	28362	5513	4.584	21.349	0.032	1.18343	0.236193	S	0	0.0544205	0.0404786	4.83741	-0.947216
CGAGTGCTCATTGCTT-1_1	NX1	Nx	08d	14601	3889	2.424	24.697	0.007	0.374004	-0.393066	S	2	0.509054	0.28906	-3.62446	-0.544659
CGAGTTACACACGGTC-1_1	NX1	Nx	08d	15414	4036	4.061	21.532	0	0.408783	1.49938	G2M	4	0.0455568	0.181218	-2.2436	1.18527
CGATCGGAGGCCTGAA-1_1	NX1	Nx	08d	15547	3998	4.355	19.959	0.019	0.79228	0.428366	S	0	0.0544205	0.216707	-1.08156	2.46128
CGATCGGCATCAGCAT-1_1	NX1	Nx	08d	13014	3623	7.284	23.421	0.008	-0.467825	-0.595176	G1	2	0.0971621	0.0404786	-0.977919	-3.47592
CGATCGGCATGACTTG-1_1	NX1	Nx	08d	8167	2664	3.049	29.644	0.049	0.409929	-0.266152	S	2	0.0971621	0.0404786	-2.45887	-2.61676
CGATGCGGTTCGAGCC-1_1	NX1	Nx	08d	10051	3182	6.895	19.719	0.05	-0.472723	-0.506247	G1	0	0.0544205	0.0404786	-0.779252	0.514181
CGATGCGGTTGTCATG-1_1	NX1	Nx	08d	33818	5862	5.553	18.747	0.024	0.738728	-0.349001	S	1	0.0320019	0.0404786	4.11699	5.22278
CGATGGCCAGGACTAG-1_1	NX1	Nx	08d	21501	4965	5.302	20.287	0.019	0.637869	1.95674	G2M	2	0.0971621	0.0404786	-2.12075	-3.65158
CGCAGGTAGAGAGCAA-1_1	NX1	Nx	08d	14038	3659	3.597	28.451	0.014	0.411076	0.934955	G2M	5	0.0236857	0.0404786	-8.58103	-4.33445
CGCAGGTAGTCAAGCG-1_1	NX1	Nx	08d	26902	5193	4.416	22.418	0.022	1.28143	-0.0568279	S	3	0.0239706	0.0461496	-1.10478	4.63023
CGCAGGTTCTTTGGAG-1_1	NX1	Nx	08d	21256	5049	5.147	19.632	0.014	1.39054	0.182737	S	2	0.0971621	0.0404786	-0.663097	-2.8357
CGCATAATCATGAGAA-1_1	NX1	Nx	08d	21861	4716	4.291	21.943	0.014	0.102364	2.16577	G2M	0	0.477416	0.0646147	-1.16285	-1.7593
CGCATAATCCCGTTGT-1_1	NX1	Nx	08d	22390	4910	4.984	21.398	0.04	1.19382	0.242128	S	0	0.0544205	0.135375	4.32918	-1.5876
CGCCAGACAGCTGAAG-1_1	NX1	Nx	08d	23528	4695	6.596	20.172	0.021	-0.0831129	-0.577959	G1	0	0.0544205	0.0404786	3.08403	1.77518
CGCCAGATCTTGCAGA-1_1	NX1	Nx	08d	25334	5376	6.02	20.013	0.028	1.25785	0.238989	S	3	0.0239706	0.0404786	-1.75321	3.8579
CGCCATTGTAGTTCCA-1_1	NX1	Nx	08d	12205	3735	2.114	22.392	0.033	-0.0789604	1.24133	G2M	2	0.0971621	0.0404786	-2.8233	-0.631739
CGCGTGAGTACAGTAA-1_1	NX1	Nx	08d	17957	4239	5.909	23.695	0.022	0.760013	0.580884	S	0	0.0544205	0.443753	1.49294	0.140408
CGGAACCAGAATCGAT-1_1	NX1	Nx	08d	16317	4167	5.485	22.437	0.025	-0.164026	-0.634548	G1	4	0.0455568	0.0404786	-2.24315	0.566474
CGGAACCTCCACGGAC-1_1	NX1	Nx	08d	12490	3864	5.148	22.074	0.04	0.048075	1.5239	G2M	3	0.0239706	0.0404786	-2.65598	3.07695
CGGAATTCAGTGCCTG-1_1	NX1	Nx	08d	18113	4138	5.002	23.977	0.011	0.170971	-0.620206	S	1	0.0320019	0.0404786	3.67032	1.50795
CGGACACAGACGCTCC-1_1	NX1	Nx	08d	12618	3395	2.901	28.523	0.032	0.0901842	-0.220254	S	2	0.0971621	0.0404786	-4.46739	-0.877663
CGGACACCAGCAGTTT-1_1	NX1	Nx	08d	13226	3374	6.011	26.282	0.045	-0.453749	-0.451938	G1	2	0.0971621	0.0646147	-0.902869	-2.75763
CGGAGAACAATACCTG-1_1	NX1	Nx	08d	45924	6376	4.797	20.863	0.035	0.746702	-0.657445	S	1	0.0320019	0.0404786	4.93086	4.50702
CGGAGAATCTAGTGTG-1_1	NX1	Nx	08d	21074	4312	6.506	25.89	0.005	0.124619	-0.311981	S	0	0.0544205	0.0404786	3.05083	1.25471
CGGAGAATCTGTCGCT-1_1	NX1	Nx	08d	21487	4964	3.216	21.725	0.033	0.636482	1.78611	G2M	2	0.553806	0.205118	0.370418	-1.74961
CGGCAGTGTGGTCTCG-1_1	NX1	Nx	08d	28436	5462	6.284	19.359	0.035	0.193996	-0.334134	S	1	0.0320019	0.0404786	5.00875	4.91722
CGGCAGTTCGAACGGA-1_1	NX1	Nx	08d	16754	4028	4.948	27.42	0.012	-0.434074	-0.624271	G1	0	0.477416	0.0404786	-1.78063	-0.364608
CGGCAGTTCGCTCTAC-1_1	NX1	Nx	08d	23467	5068	6.439	23.152	0.017	-0.161894	-0.292675	G1	2	0.0971621	0.0404786	-2.02452	-3.81904
CGGGACTCAGTCCCGA-1_1	NX1	Nx	08d	42862	6373	4.181	23.86	0.035	0.856239	-0.393414	S	0	0.0544205	0.0404786	4.57635	0.402019
CGGGCATCAGCTACAT-1_1	NX1	Nx	08d	13558	3757	6.631	23.499	0.022	-0.25782	-0.655818	G1	2	0.0971621	0.233633	-1.00406	-2.92291
CGGGCATTCAACTGAC-1_1	NX1	Nx	08d	10155	3092	3.722	25.002	0.03	-0.214562	-0.537567	G1	2	0.0971621	0.374009	-3.57086	-1.69509
CGGGCATTCAGGACAG-1_1	NX1	Nx	08d	46126	6119	4.074	31.548	0.013	0.271712	-0.280408	S	5	0.0236857	0.135375	-12.4212	-4.55873
CGGGCATTCTAGTCAG-1_1	NX1	Nx	08d	21795	4530	5.373	26.575	0.018	0.648414	0.795226	G2M	4	0.0455568	0.0404786	-1.15882	1.65468
CGGGTCACAGCTTTGA-1_1	NX1	Nx	08d	23728	5193	7.072	14.991	0.025	0.00491293	1.49989	G2M	1	0.0320019	0.0404786	4.11601	5.06391
CGGGTCATCGATAACC-1_1	NX1	Nx	08d	16760	4283	4.326	20.149	0.048	-0.328179	-0.743935	G1	3	0.0239706	0.0404786	-0.120278	5.20336
CGGGTGTAGCGTGTTT-1_1	NX1	Nx	08d	29982	5551	4.946	20.336	0.01	1.0849	0.561912	S	4	0.0455568	0.0404786	0.500348	2.38701
CGGGTGTCAAAGGATT-1_1	NX1	Nx	08d	16950	4112	6.649	22.283	0.024	0.172253	0.527051	G2M	0	0.0544205	0.0404786	-0.74422	2.5753
CGGGTGTCATAGAATG-1_1	NX1	Nx	08d	21028	5055	6.819	21.8	0.024	-0.50844	-0.577439	G1	10	0	0.0646147	14.0972	-1.91757
CGGGTGTGTCCGGACT-1_1	NX1	Nx	08d	21575	4570	4.723	28.352	0.019	0.11937	2.19537	G2M	3	0.0239706	0.0404786	-3.71163	2.21543
CGGGTGTGTTCACGAT-1_1	NX1	Nx	08d	53169	7035	6.272	24.981	0.045	-0.330425	-0.803391	G1	0	0.0544205	0.177399	2.18374	1.21479
CGGTCAGGTCCCGCAA-1_1	NX1	Nx	08d	22740	5142	5.356	20.519	0.057	-0.189354	-0.656986	G1	2	0.605018	0.0404786	-1.97986	0.509698
CGGTCAGGTGCGGCTT-1_1	NX1	Nx	08d	23849	5136	5.317	18.441	0.025	0.504586	0.874793	G2M	0	0.0544205	0.344825	3.68507	0.235977
CGGTCAGTCAGCCTTC-1_1	NX1	Nx	08d	64517	7546	4.39	19.971	0.023	0.42011	0.123076	S	1	0.544229	0.0404786	3.27701	1.69486
CGGTCAGTCGTTAGAC-1_1	NX1	Nx	08d	20672	4569	6.502	22.572	0.01	0.248379	0.450206	G2M	0	0.0544205	0.0404786	4.74805	-1.48122
CGTAAGTGTCTACAGT-1_1	NX1	Nx	08d	25493	4702	3.071	29.012	0.008	0.342091	1.49263	G2M	5	0.0236857	0.177399	-12.3105	-4.79751
CGTAATGCACCTGCAG-1_1	NX1	Nx	08d	26650	4902	6.732	27.947	0.015	0.624933	-0.480869	S	3	0.0239706	0.0646147	-1.94613	3.98008
CGTAATGTCTCACCCA-1_1	NX1	Nx	08d	20238	4720	6.32	19.478	0.005	-0.274413	-0.545881	G1	1	0.0320019	0.0404786	2.82923	1.65007
CGTAATGTCTCTGCTG-1_1	NX1	Nx	08d	13120	3759	6.296	23.399	0	-0.115907	-0.185244	G1	2	0.0971621	0.257769	-0.833735	-2.18804
CGTAGTAGTGTTAACC-1_1	NX1	Nx	08d	8440	2552	4.017	29.526	0.036	-0.214201	-0.396131	G1	2	0.0971621	0.0404786	-2.16804	-3.06857
CGTAGTATCTTGCGCT-1_1	NX1	Nx	08d	94549	8463	4.107	22.838	0.022	0.383773	0.787435	G2M	1	0.0320019	0.0404786	7.82474	4.6131
CGTCCATAGACTCCGC-1_1	NX1	Nx	08d	18721	4795	4.215	17.638	0.043	-0.0717121	-0.621434	G1	2	0.0971621	0.931585	-1.67951	-3.30272
CGTCCATTCCGACATA-1_1	NX1	Nx	08d	29116	5906	3.596	18.533	0.034	0.504178	0.872645	G2M	0	0.0544205	0.0404786	0.70148	-1.31676
CGTGAATCAAAGGCTG-1_1	NX1	Nx	08d	12158	3516	4.853	21.04	0.008	-0.102494	0.204076	G2M	2	0.0971621	0.0404786	1.65307	-3.7738
CGTGAATCACGGCACT-1_1	NX1	Nx	08d	12331	3441	4.574	25.87	0.016	0.103551	-0.45501	S	2	0.0971621	0.0646147	-1.77239	-2.47809
CGTGCTTCACTACCCT-1_1	NX1	Nx	08d	17288	4032	3.39	30.929	0.023	-0.0393469	-0.430091	G1	2	0.0971621	0.0646147	-4.02708	-3.01222
CGTGCTTCAGTATTCG-1_1	NX1	Nx	08d	15298	4035	5.759	20.271	0.039	-0.275517	-0.630791	G1	0	0.0544205	0.0551106	-1.35634	2.22737
CGTGCTTTCGAGATAA-1_1	NX1	Nx	08d	13205	3752	5.74	22.287	0.053	-0.0259882	-0.57785	G1	2	0.0971621	0.0404786	-2.09749	-2.73024
CGTGCTTTCTTTGGAG-1_1	NX1	Nx	08d	9048	3175	7.129	17.916	0.022	0.96331	0.324952	S	0	0.0544205	0.0404786	3.4553	-1.37282
CGTGTCTAGCGACATG-1_1	NX1	Nx	08d	22402	4234	5.245	33.26	0.013	1.14947	0.452117	S	6	0	0.0404786	0.665227	-13.3247
CGTGTCTCAAGTACCT-1_1	NX1	Nx	08d	13520	3688	5.288	19.867	0.015	-0.183636	-0.541396	G1	1	0.0320019	0.0404786	0.780309	-3.69787
CGTGTCTGTCTTCAAG-1_1	NX1	Nx	08d	16008	3873	6.159	27.674	0.012	1.12499	-0.0056503	S	2	0.0971621	0.0404786	-3.26324	-0.44828
CGTTAGACATGACAGG-1_1	NX1	Nx	08d	12187	3474	2.773	26.799	0.025	-0.205361	-0.463434	G1	2	0.0971621	0.181218	-4.75299	-2.07098
CGTTAGAGTCAAGTTC-1_1	NX1	Nx	08d	14096	3805	4.987	24.787	0.028	-0.342577	-0.22342	G1	3	0.0239706	0.0404786	-3.59075	1.93909
CGTTAGATCAAATAGG-1_1	NX1	Nx	08d	14836	3834	4.651	26.065	0.027	-0.460912	-0.623888	G1	2	0.0971621	0.496404	-1.1308	-2.91952
CGTTAGATCGGACAAG-1_1	NX1	Nx	08d	11235	3344	2.759	24.949	0.045	1.23238	0.0940064	S	2	0.509054	0.0404786	-3.13579	-0.243695
CGTTCTGAGTAGGAAG-1_1	NX1	Nx	08d	11082	3102	7.219	26.493	0.018	-0.186677	-0.439241	G1	4	0.0455568	0.0404786	0.522302	1.28334
CGTTCTGCAAACCGGA-1_1	NX1	Nx	08d	32556	5426	4.439	20.899	0.028	0.222028	-0.425117	S	1	0.0320019	0.0404786	4.2151	5.15861
CGTTGGGAGATTGGGC-1_1	NX1	Nx	08d	14266	3879	7.746	22.683	0.028	0.0622188	-0.54747	S	2	0.0971621	0.135375	-1.54405	-2.59636
CGTTGGGAGTACTGTC-1_1	NX1	Nx	08d	13683	3677	5.562	24.183	0.007	-0.468199	-0.433954	G1	2	0.0971621	0.0404786	0.593914	-3.52907
CGTTGGGGTGCATCTA-1_1	NX1	Nx	08d	56156	6342	2.985	24.106	0.023	-0.391612	-0.741226	G1	1	0.0320019	0.0404786	7.25465	4.7035
CGTTGGGGTTATCCAG-1_1	NX1	Nx	08d	14379	3942	7.08	26.003	0.021	-0.137125	0.885064	G2M	3	0.0239706	0.205118	-2.97296	2.91932
CGTTGGGTCCTGTACC-1_1	NX1	Nx	08d	20636	4956	5.859	24.041	0.024	0.152133	1.59836	G2M	2	0.0971621	0.0404786	-3.46185	-2.48803
CTAACCCAGGCCTGCT-1_1	NX1	Nx	08d	36285	5991	4.33	17.897	0.033	0.3452	1.4961	G2M	0	0.0544205	0.931585	2.83155	0.990261
CTAACCCCACATGTTG-1_1	NX1	Nx	08d	20272	4848	5.347	18.651	0.035	-0.459247	-0.769366	G1	2	0.0971621	0.931585	-0.353784	-2.68475
CTAACCCGTGTCCGGT-1_1	NX1	Nx	08d	12814	3375	5.065	28.18	0	-0.0964953	-0.471646	G1	0	0.0544205	0.0404786	4.40706	-0.0394992
CTAACCCTCTGCATAG-1_1	NX1	Nx	08d	22553	4939	3.578	22.254	0.009	0.696012	1.11301	G2M	2	0.0971621	0.0404786	0.132771	-2.54745
CTAACTTAGGATACCG-1_1	NX1	Nx	08d	52433	6768	4.869	15.048	0.01	-0.140718	-0.665655	G1	1	0.0320019	0.0404786	7.52159	4.58233
CTAACTTAGTTCGGTT-1_1	NX1	Nx	08d	17174	4042	5.258	27.419	0.017	-0.412724	-0.707959	G1	2	0.0971621	0.257769	-0.482993	-3.06361
CTAACTTCAAATCCCA-1_1	NX1	Nx	08d	14926	4260	5.42	19.007	0.027	-0.0861094	-0.515642	G1	2	0.0971621	0.0404786	-2.82984	-0.918704
CTAACTTCAAGAGAGA-1_1	NX1	Nx	08d	11457	3392	6.537	26.525	0	0.217134	-0.463371	S	2	0.0971621	0.0404786	-3.37258	-2.09178
CTAACTTGTCAGGAGT-1_1	NX1	Nx	08d	18353	3610	4.664	33.308	0.005	1.02583	0.0938034	S	6	0	0.0404786	0.69642	-13.3409
CTAAGTGAGCGCATCC-1_1	NX1	Nx	08d	12592	3525	5.94	22.745	0.032	0.146721	0.390578	G2M	0	0.0544205	0.303249	1.31558	-0.0166637
CTAAGTGCAGATACTC-1_1	NX1	Nx	08d	18029	4338	4.615	24.56	0.006	0.13559	-0.59602	S	4	0.0455568	0.0404786	-1.60803	1.64802
CTAAGTGCAGCTGTTA-1_1	NX1	Nx	08d	15047	3988	2.738	28.364	0.013	-0.182242	-0.639871	G1	2	0.0971621	0.181218	-2.05634	-2.47591
CTAAGTGCATGCCGGT-1_1	NX1	Nx	08d	22224	4892	4.392	22.287	0.045	1.00828	-0.210597	S	0	0.0544205	0.0404786	4.47294	-1.17558
CTAAGTGCATGTGCCG-1_1	NX1	Nx	08d	65372	7461	3.557	19.779	0.021	0.339667	0.938097	G2M	1	0.0320019	0.106191	6.10961	2.91019
CTAAGTGGTACCACGC-1_1	NX1	Nx	08d	16223	4057	4.753	23.498	0.018	-0.0795889	-0.490144	G1	3	0.0239706	0.0404786	-4.75208	2.79042
CTAAGTGGTGTTCCTC-1_1	NX1	Nx	08d	23639	1980	0.939	32.899	0	-0.162227	-0.108681	G1	7	0.0277228	0.233633	-7.87881	-6.86953
CTACAGACAATACGAA-1_1	NX1	Nx	08d	2881	1378	0.035	21.52	0	0.632456	0.231759	S	0	0.0544205	0.0404786	-0.999295	-1.29174
CTACAGACAGGAAGTC-1_1	NX1	Nx	08d	27713	5138	5.69	25.948	0.032	-0.351905	-0.730874	G1	2	0.0971621	0.0404786	-1.94904	-0.348893
CTACAGATCATCCTGC-1_1	NX1	Nx	08d	18311	4706	6.002	18.3	0.033	-0.0233732	-0.713226	G1	3	0.0239706	0.0646147	-3.91489	3.61964
CTACATTAGATTCGCT-1_1	NX1	Nx	08d	20202	4926	4.599	16.147	0.02	-0.138026	-0.632529	G1	0	0.0544205	0.205118	-0.370938	-0.408606
CTACCCAAGAATCTAG-1_1	NX1	Nx	08d	33567	5934	4.963	22.236	0.015	0.576199	1.90985	G2M	3	0.0239706	0.0404786	-2.13708	4.36795
CTACCCAAGTGAGTTA-1_1	NX1	Nx	08d	19261	4407	1.49	25.476	0.016	0.437211	0.629797	G2M	0	0.0544205	0.180829	1.54807	0.0185845
CTACCCAAGTTTCAGC-1_1	NX1	Nx	08d	22640	5396	4.09	18.339	0.009	1.39015	0.119132	S	2	0.0971621	0.0404786	-2.7835	-0.53738
CTACCCACACAGCTGC-1_1	NX1	Nx	08d	17442	4458	2.643	21.236	0.034	0.0594654	-0.552057	S	4	0.0455568	0.0404786	-0.806924	1.2678
CTACCCACAGGTGACA-1_1	NX1	Nx	08d	21275	4926	4.31	20.705	0.024	1.27333	-0.309507	S	2	0.0971621	0.0404786	-0.494007	-4.06566
CTACCCAGTAGAAACT-1_1	NX1	Nx	08d	33995	6012	2.297	25.127	0.009	0.0202339	-0.66602	S	8	0	0.177399	5.58391	-9.44355
CTACCCATCAGCCTCT-1_1	NX1	Nx	08d	16508	4532	3.725	20.323	0.024	-0.0709369	1.44622	G2M	3	0.0239706	0.0404786	-2.23684	4.38714
CTACCCATCGATTGAC-1_1	NX1	Nx	08d	24710	5526	3.387	16.56	0.04	0.613829	-0.162528	S	4	0.0455568	0.0404786	-0.597252	2.61122
CTACCTGGTTAAGACA-1_1	NX1	Nx	08d	18107	4611	3.827	21.721	0.022	0.0940754	-0.571928	S	2	0.0971621	0.0404786	-0.950292	-3.79663
CTACGGGAGCGCCTCA-1_1	NX1	Nx	08d	18019	4102	5.999	20.306	0.017	0.0292216	-0.26064	S	1	0.0320019	0.0404786	3.13159	5.30875
CTACTATAGAATAACC-1_1	NX1	Nx	08d	27109	5081	5.157	27.589	0.033	0.017512	-0.537149	S	5	0.0236857	0.177399	-11.5834	-4.42245
CTACTATAGGTGATCG-1_1	NX1	Nx	08d	27851	5476	5.084	19.597	0.025	1.1212	0.739304	S	0	0.0544205	0.0404786	4.4099	-0.251722
CTACTATCAGGTCCGT-1_1	NX1	Nx	08d	12344	3903	4.334	17.49	0.016	0.0204218	1.60351	G2M	2	0.0971621	0.0404786	-2.52994	-0.0789543
CTACTATCATCTCCCA-1_1	NX1	Nx	08d	14623	4099	5.006	21.316	0.027	0.10595	-0.668783	S	2	0.0971621	0.198377	-3.29321	-2.15164
CTACTATGTTAAAGTG-1_1	NX1	Nx	08d	12736	3561	5.755	27.552	0.008	0.0127004	0.0663644	G2M	3	0.0239706	0.177399	-4.28921	2.78596
CTACTATTCCTACTGC-1_1	NX1	Nx	08d	15766	4116	4.421	22.694	0.032	-0.0620757	-0.639775	G1	0	0.0544205	0.0404786	2.1623	1.5554
CTAGACAAGGAAGTAG-1_1	NX1	Nx	08d	14812	3621	5.043	27.43	0.007	-0.349642	-0.436931	G1	0	0.0544205	0.0404786	0.820887	-1.38676
CTAGACACAAGACCGA-1_1	NX1	Nx	08d	51673	6336	2.74	18.292	0.021	0.0233564	-0.60154	S	1	0.0320019	0.0404786	7.68953	4.70224
CTAGACACAGGGATAC-1_1	NX1	Nx	08d	25964	5486	5.627	21.098	0.008	-0.0323145	-0.597867	G1	5	0.0236857	0.0404786	-11.5678	-4.15639
CTAGACACATCTTCGC-1_1	NX1	Nx	08d	18064	4833	0.471	18.329	0.028	-0.493618	-0.644034	G1	2	0.0971621	0.931585	-2.36595	-2.17072
CTAGACATCATTTGCT-1_1	NX1	Nx	08d	30059	5754	4.691	23.025	0.027	0.0826857	-0.529144	S	5	0.0236857	0.0404786	-10.7682	-4.12494
CTAGACATCGCCCAGA-1_1	NX1	Nx	08d	23429	5004	4.742	21.542	0.013	0.738046	-0.167443	S	0	0.0544205	0.0404786	5.20049	0.912901
CTAGGTAAGGTAGCAC-1_1	NX1	Nx	08d	17069	4256	6.21	23.218	0.023	0.37973	-0.529835	S	2	0.0971621	0.0404786	-2.76137	-2.88112
CTAGGTACAAAGCTCT-1_1	NX1	Nx	08d	29326	5394	4.869	25.193	0.017	0.00417719	-0.187835	S	2	0.0971621	0.0404786	1.63221	-3.62893
CTAGGTAGTTAGGGTG-1_1	NX1	Nx	08d	53863	6317	3.281	21.863	0.017	-0.0386446	-0.826951	G1	1	0.0320019	0.0646147	6.66999	4.806
CTAGGTAGTTGGTGTT-1_1	NX1	Nx	08d	36818	6100	4.636	19.366	0.027	0.850126	0.714134	S	1	0.0320019	0.0404786	5.14519	2.73737
CTATAGGAGCCAGACA-1_1	NX1	Nx	08d	16279	3974	5.621	23.484	0.012	-0.192885	-0.409422	G1	2	0.430188	0.0404786	-2.13463	0.0817886
CTATAGGCATCTGTTT-1_1	NX1	Nx	08d	13181	3591	1.464	34.163	0.046	-0.314431	-0.404721	G1	3	0.0239706	0.0404786	-4.38813	2.52391
CTATAGGGTCAGCTTA-1_1	NX1	Nx	08d	25080	5426	6.611	18.577	0.008	1.09876	-0.184683	S	5	0.0236857	0.135375	-12.1654	-4.76759
CTATAGGGTTAGTTCG-1_1	NX1	Nx	08d	12336	3476	4.069	27.675	0.032	-0.380896	-0.6022	G1	2	0.0971621	0.303249	-2.92572	-2.37613
CTATAGGTCCACGTGG-1_1	NX1	Nx	08d	20072	4385	4.055	29.648	0.03	0.256382	-0.630422	S	2	0.0971621	0.0404786	-4.54226	-1.12774
CTATCCGAGATAGCAT-1_1	NX1	Nx	08d	27923	5641	5.458	19.496	0.029	0.112089	1.98806	G2M	2	0.0971621	0.0404786	-2.22604	-0.90033
CTATCCGAGCAGCCCT-1_1	NX1	Nx	08d	37394	6190	4.204	23.02	0.027	0.547328	1.54082	G2M	3	0.0239706	0.0404786	-3.56821	3.68132
CTATCCGAGTTTCGGT-1_1	NX1	Nx	08d	17707	4154	5.026	27.119	0.011	1.48024	0.173305	S	3	0.0239706	0.0404786	-3.60136	2.66249
CTATCCGGTTGTTTGG-1_1	NX1	Nx	08d	30642	5746	4.357	21.63	0.029	0.982888	0.283447	S	4	0.0455568	0.205118	-2.01709	1.56255
CTATCTAAGACCCGCT-1_1	NX1	Nx	08d	17738	4591	5.812	18.311	0.045	0.514042	1.74102	G2M	4	0.397687	0.0404786	-3.07234	0.123404
CTATCTAAGATACATG-1_1	NX1	Nx	08d	21864	4825	4.825	18.871	0.027	0.832379	0.820812	S	1	0.0320019	0.0404786	3.23451	4.81857
CTATCTAAGGAACATT-1_1	NX1	Nx	08d	7686	2132	7.078	12.412	0.013	-0.423009	-0.138194	G1	9	0	0.233633	-7.60823	-8.79913
CTATCTACAAGAGAGA-1_1	NX1	Nx	08d	34197	5620	5.246	24.02	0.026	0.107241	1.39936	G2M	1	0.0320019	0.0404786	3.71217	1.79722
CTATCTACAAGAGGTC-1_1	NX1	Nx	08d	32595	6116	4.175	18.04	0.025	0.0307042	1.52802	G2M	0	0.0544205	0.374009	2.81857	1.69583
CTATCTACACAACCGC-1_1	NX1	Nx	08d	14172	3674	3.5	20.343	0.035	-0.351776	-0.613483	G1	1	0.0320019	0.0404786	0.785339	-2.27085
CTATCTAGTAACATAG-1_1	NX1	Nx	08d	22206	5262	4.873	17.545	0.041	0.590456	1.22601	G2M	0	0.0544205	0.0404786	5.18771	0.037613
CTCAACCAGGGATGTC-1_1	NX1	Nx	08d	48917	6652	4.289	19.247	0.016	1.01018	-0.0243998	S	1	0.0320019	0.0404786	6.27093	3.28004
CTCAACCCACAACCGC-1_1	NX1	Nx	08d	17023	2967	7.349	23.18	0	-0.488722	-0.382556	G1	9	0	0.233633	-7.51361	-9.63354
CTCAACCCATGGCCCA-1_1	NX1	Nx	08d	10660	3465	3.79	22.205	0.009	-0.167043	-0.493071	G1	2	0.0971621	0.443753	-3.81576	-2.40507
CTCAACCGTATCTCGA-1_1	NX1	Nx	08d	19116	4835	4.028	18.377	0.031	-0.0148793	0.240113	G2M	0	0.0544205	0.0404786	1.32578	1.48542
CTCAACCTCACTGATG-1_1	NX1	Nx	08d	22922	5143	4.624	19.069	0.017	0.790433	-0.400853	S	2	0.0971621	0.0404786	0.546575	-4.03085
CTCAACCTCCTCTGCA-1_1	NX1	Nx	08d	48343	6585	2.973	18.356	0.027	0.633017	1.07272	G2M	1	0.0320019	0.0404786	4.91763	4.1516
CTCAAGAAGGCAGGGA-1_1	NX1	Nx	08d	11294	3393	4.622	23.366	0.009	0.00852262	-0.542572	S	2	0.0971621	0.0404786	-3.31951	-1.00059
CTCAAGACAACGATTC-1_1	NX1	Nx	08d	16681	4166	3.651	23.404	0.03	0.0666392	1.02363	G2M	4	0.0455568	0.0404786	-0.336117	2.59751
CTCAAGACACATGGTT-1_1	NX1	Nx	08d	28056	5675	4.43	16.891	0.039	1.16489	0.841108	S	4	0.0455568	0.0404786	-1.2942	1.63003
CTCAAGACATGGCTGC-1_1	NX1	Nx	08d	19714	4842	4.834	18.976	0.005	0.790283	0.116107	S	3	0.0239706	0.0404786	-3.05202	3.31645
CTCAAGAGTCGCGTCA-1_1	NX1	Nx	08d	22720	4753	6.382	19.313	0.013	0.587456	1.07152	G2M	1	0.0320019	0.0404786	3.30729	5.41152
CTCAAGAGTGCGACAA-1_1	NX1	Nx	08d	15977	3924	6.19	28.554	0.031	1.08171	-0.212788	S	5	0.0236857	0.205118	-11.1872	-4.5693
CTCAATTCACTGGAAG-1_1	NX1	Nx	08d	11527	3483	6.628	25.288	0.026	0.0140946	-0.13021	S	5	0.0236857	0.177399	-10.0106	-4.38469
CTCAATTGTGGCTGCT-1_1	NX1	Nx	08d	33486	5713	3.628	21.463	0.024	0.341821	1.3711	G2M	4	0.0455568	0.0404786	-1.18313	1.80095
CTCAATTTCCAGCTCT-1_1	NX1	Nx	08d	10822	3241	4.288	25.042	0.018	0.716327	1.35736	G2M	5	0.0236857	0.135375	-9.31411	-4.56554
CTCACTGCAGCCTATA-1_1	NX1	Nx	08d	16398	3603	3.464	29.973	0.006	-0.261168	-0.600078	G1	0	0.0544205	0.0404786	3.94068	0.457706
CTCACTGGTGAAGCGT-1_1	NX1	Nx	08d	20466	4568	5.805	23.849	0.015	0.911354	-0.288321	S	0	0.40363	0.0404786	-1.28209	-0.351167
CTCACTGTCCGTGACG-1_1	NX1	Nx	08d	19244	4471	7.722	24.179	0.026	-0.271518	-0.541651	G1	2	0.0971621	0.135375	-3.46986	-0.647884
CTCAGAACAAGTATAG-1_1	NX1	Nx	08d	25088	5361	5.094	22.664	0.032	0.542031	1.40534	G2M	1	0.574241	0.0404786	1.88196	-2.49599
CTCAGAACAGCAGTAG-1_1	NX1	Nx	08d	26074	5513	4.583	19.368	0.012	1.25742	0.63066	S	0	0.0544205	0.0404786	-0.396613	-0.999137
CTCAGAACATGTGGCC-1_1	NX1	Nx	08d	13936	3864	4.592	23.35	0.007	-0.324372	-0.583029	G1	2	0.0971621	0.0404786	-1.17839	-3.94008
CTCAGAAGTAATGTGA-1_1	NX1	Nx	08d	27650	5019	3.41	22.608	0.014	0.94918	0.762628	S	1	0.0320019	0.0404786	4.19148	1.88679
CTCAGGGAGCATCTTG-1_1	NX1	Nx	08d	15383	4033	5.058	25.366	0.013	-0.301728	-0.642681	G1	2	0.0971621	0.0404786	-0.675202	-3.70092
CTCAGGGCAGCACAGA-1_1	NX1	Nx	08d	17111	4070	5.219	24.464	0.041	-0.27371	-0.568583	G1	0	0.0544205	0.0404786	-0.793667	0.194587
CTCAGGGGTAACGGTG-1_1	NX1	Nx	08d	15253	3953	5.081	22.251	0.013	0.04885	-0.355813	S	0	0.0544205	0.0404786	-1.4803	3.08376
CTCATCGAGGGTTAAT-1_1	NX1	Nx	08d	17661	4280	4.417	23.855	0.045	0.526112	-0.464915	S	2	0.0971621	0.0404786	-3.59876	-0.0170208
CTCATCGTCACCTTAT-1_1	NX1	Nx	08d	51495	7201	4.066	20.59	0.027	0.212167	-0.435129	S	0	0.0544205	0.0404786	1.62412	1.29449
CTCATCGTCACTGTCC-1_1	NX1	Nx	08d	25478	4674	4.993	27.879	0.027	0.143778	1.63996	G2M	1	0.0320019	0.0404786	3.24209	2.51438
CTCATGCCAAGATGTA-1_1	NX1	Nx	08d	43226	5980	2.906	23.655	0.016	1.41781	0.655728	S	6	0	0.177399	-1.37123	-13.5863
CTCATGCCAAGCTCTA-1_1	NX1	Nx	08d	22681	4890	4.008	23.231	0.013	1.30569	-0.268194	S	0	0.0544205	0.374009	3.0409	-1.00001
CTCATGCGTCATGGCC-1_1	NX1	Nx	08d	13890	3741	7.408	21.893	0.014	-0.323555	1.00561	G2M	2	0.0971621	0.0404786	1.4648	-3.77954
CTCATTAAGCAGTACG-1_1	NX1	Nx	08d	65293	7611	4.137	18.544	0.026	0.0577557	0.836834	G2M	1	0.0320019	0.0404786	1.01962	-3.43998
CTCATTACATTGCTTT-1_1	NX1	Nx	08d	31605	5649	3.544	23.563	0.009	1.24256	0.643988	S	6	0	0.0404786	-0.963279	-13.2627
CTCCAACAGGCCATAG-1_1	NX1	Nx	08d	20148	4523	6.313	20.95	0.025	-0.178734	-0.619654	G1	1	0.0320019	0.0404786	2.67659	3.75248
CTCCAACGTCATCAGT-1_1	NX1	Nx	08d	28965	5554	3.815	22.237	0.024	0.277213	1.87235	G2M	0	0.0544205	0.0404786	3.84124	-2.28405
CTCCAACGTTCCACAA-1_1	NX1	Nx	08d	27591	5565	4.451	16.444	0.029	1.0367	0.951126	S	3	0.0239706	0.0404786	-0.659815	5.28382
CTCCAACTCTACTTCA-1_1	NX1	Nx	08d	22712	5106	4.94	18.721	0.018	0.0408238	-0.72042	S	2	0.0971621	0.0404786	-0.315649	-2.92124
CTCCAACTCTCTGACC-1_1	NX1	Nx	08d	15320	4124	4.458	20.933	0.02	-0.0359363	0.780586	G2M	3	0.0239706	0.0404786	-2.47312	3.412
CTCCACAAGCGCATCC-1_1	NX1	Nx	08d	38402	6282	3.963	20.934	0.013	0.110353	1.72796	G2M	3	0.0239706	0.0404786	-2.877	4.49259
CTCCACACAGTTCACA-1_1	NX1	Nx	08d	19861	4579	3.167	21.711	0.02	0.4087	0.104402	S	4	0.0455568	0.233633	-0.381938	2.56956
CTCCACATCATCGCAA-1_1	NX1	Nx	08d	15277	4167	4.124	21.516	0.052	-0.242949	-0.592451	G1	2	0.0971621	0.0404786	-2.16384	-3.78037
CTCCATGAGCCATATC-1_1	NX1	Nx	08d	30477	6049	1.401	18.44	0.02	0.00359988	1.69942	G2M	0	0.0544205	0.216707	1.74344	-1.36357
CTCCATGAGGACCCAA-1_1	NX1	Nx	08d	17335	4235	5.907	21.621	0.023	-0.329601	-0.466314	G1	0	0.0544205	0.205118	-1.58332	2.59825
CTCCATGAGGATAATC-1_1	NX1	Nx	08d	13637	3672	4.136	24.302	0.029	-0.250838	-0.706534	G1	2	0.0971621	0.0404786	-0.689122	-3.58646
CTCCATGAGTGGATTA-1_1	NX1	Nx	08d	15600	3839	2.859	30.686	0.019	1.33565	0.400696	S	3	0.0239706	0.233633	-3.60537	0.98023
CTCCATGTCCGTCAAA-1_1	NX1	Nx	08d	24213	5498	4.332	18.519	0.033	1.25092	0.303798	S	4	0.0455568	0.0404786	-1.50795	1.30387
CTCCCAAAGTCATACC-1_1	NX1	Nx	08d	36735	6180	5.197	22.455	0.014	0.197469	-0.590744	S	4	0.0455568	0.0404786	-0.268319	1.98339
CTCCCAACAGACCGCT-1_1	NX1	Nx	08d	24028	5207	4.049	22.653	0.017	1.1656	1.17631	G2M	2	0.0971621	0.198377	-4.00368	-2.51777
CTCCCAAGTGGGTTGA-1_1	NX1	Nx	08d	24188	5249	4.535	20.597	0.025	0.488189	-0.562191	S	1	0.0320019	0.0404786	1.90904	-2.43458
CTCCCAATCAACGTGT-1_1	NX1	Nx	08d	17949	4383	4.307	23.372	0.006	0.343699	1.44806	G2M	2	0.0971621	0.0404786	-2.38605	0.66661
CTCCCTCCAGAGATTA-1_1	NX1	Nx	08d	13932	4069	4.414	20.65	0.022	-0.14733	-0.561038	G1	2	0.0971621	0.0404786	-2.45441	-3.14919
CTCCCTCGTCTTACAG-1_1	NX1	Nx	08d	13330	3536	1.785	31.17	0.023	1.35834	0.0614472	S	2	0.0971621	0.443753	-4.66632	-1.5231
CTCCCTCGTGCTATTG-1_1	NX1	Nx	08d	29712	5878	5.035	19.79	0.03	0.421501	1.55862	G2M	4	0.0455568	0.0404786	-2.79565	0.371354
CTCCCTCTCGCAATTG-1_1	NX1	Nx	08d	34022	6388	2.187	19.725	0.029	0.883159	0.781161	S	4	0.0455568	0.931585	0.40821	1.0348
CTCCGATAGCAGTCTT-1_1	NX1	Nx	08d	25401	5238	5.299	17.617	0.031	-0.191413	0.611299	G2M	1	0.0320019	0.0404786	2.31658	5.58606
CTCCGATGTTGCTCCT-1_1	NX1	Nx	08d	24988	5287	4.574	18.881	0.04	0.487772	-0.531783	S	0	0.0544205	0.0404786	-1.07814	2.9823
CTCCGATTCACCTTGC-1_1	NX1	Nx	08d	191813	9485	2.791	21.908	0.023	0.237986	1.4225	G2M	1	0.0320019	0.0483532	7.44085	4.0244
CTCCGATTCCGCCTAT-1_1	NX1	Nx	08d	26402	5327	4.378	21.468	0.053	0.777241	-0.623838	S	0	0.0544205	0.0404786	0.350938	-0.049286
CTCCGATTCTAACACG-1_1	NX1	Nx	08d	25896	5262	4.375	19.926	0.062	0.226182	1.93922	G2M	0	0.477416	0.0404786	-1.45495	-0.778042
CTCCTCCAGATGGTAT-1_1	NX1	Nx	08d	51352	7488	4.197	19.14	0.025	0.507946	-0.405188	S	0	0.0544205	0.0404786	3.78439	-0.892145
CTCCTCCTCTTAGCCC-1_1	NX1	Nx	08d	33451	6510	4.209	17.739	0.024	0.680553	1.61046	G2M	3	0.0239706	0.0404786	-3.62737	3.79416
CTCCTTTAGCTACTAC-1_1	NX1	Nx	08d	23033	5231	4.09	17.488	0.026	0.346537	-0.663433	S	1	0.0320019	0.0404786	4.53462	1.95087
CTCCTTTCACGACGCT-1_1	NX1	Nx	08d	18172	4546	4.243	21.407	0.033	0.125435	1.22836	G2M	3	0.0239706	0.0404786	-2.15849	3.83221
CTCCTTTGTGATTAGA-1_1	NX1	Nx	08d	57835	7711	4.838	22.867	0.024	0.647318	0.461519	S	0	0.0544205	0.177399	2.75611	-0.261668
CTCCTTTTCCTTATGT-1_1	NX1	Nx	08d	33215	6350	3.857	20.319	0.03	-0.192094	-0.509786	G1	0	0.0544205	0.931585	-2.23247	2.71737
CTCGAGGAGGAAGAAC-1_1	NX1	Nx	08d	10072	3118	2.79	27.661	0.01	-0.173514	-0.260713	G1	2	0.0971621	0.0404786	-3.95227	-0.722559
CTCGAGGGTGGTACAG-1_1	NX1	Nx	08d	16513	3729	4.717	31.678	0.012	-0.141704	-0.73942	G1	1	0.0320019	0.0404786	1.16941	-3.35569
CTCTCAGAGATTACCC-1_1	NX1	Nx	08d	21380	4822	6.646	20.851	0.037	1.44336	-0.0908213	S	3	0.0239706	0.135375	-3.28555	3.37599
CTCTCAGTCCTCACCA-1_1	NX1	Nx	08d	25767	5624	4.129	14.868	0.043	0.0174683	-0.0208579	S	3	0.0239706	0.0404786	-1.38429	4.90014
CTCTCAGTCTTGAACG-1_1	NX1	Nx	08d	36254	6398	3.886	22.817	0.014	1.01915	0.476323	S	2	0.0971621	0.0404786	-3.38337	-0.303477
CTCTCGAAGTAGGATT-1_1	NX1	Nx	08d	9981	3094	7.174	22.332	0.02	0.221263	-0.412557	S	2	0.0971621	0.135375	-2.86969	-2.17501
CTCTCGACAAAGACTA-1_1	NX1	Nx	08d	23969	5298	5.036	19.012	0.033	0.511668	1.30105	G2M	2	0.0971621	0.303249	-1.71757	-2.46723
CTCTCGACATAGAATG-1_1	NX1	Nx	08d	23063	5286	4.184	18.792	0.026	0.321452	1.29535	G2M	0	0.0544205	0.0404786	0.46034	-0.0039494
CTCTCGATCATTGCTT-1_1	NX1	Nx	08d	30116	5573	4.951	21.397	0.02	0.738366	1.09713	G2M	0	0.0544205	0.0404786	0.960678	-1.01903
CTCTCGATCGAGCTGC-1_1	NX1	Nx	08d	23999	5020	4.709	22.843	0.029	1.25558	-0.118496	S	1	0.0320019	0.0404786	3.79428	2.41523
CTCTGGTAGAGCACTG-1_1	NX1	Nx	08d	27724	4669	1.807	22.785	0.011	-0.50603	-0.472664	G1	7	0.0277228	0.0404786	-8.18663	-6.2879
CTCTGGTAGATGTAGT-1_1	NX1	Nx	08d	31265	4171	3.49	38.372	0.016	0.795079	1.32337	G2M	7	0.0277228	0.0404786	-7.24398	-7.2332
CTCTGGTAGCGACTGA-1_1	NX1	Nx	08d	29876	5774	2.233	25.298	0.007	0.891057	0.410987	S	2	0.0971621	0.443753	-3.83286	-0.585752
CTCTGGTAGTTGTAAG-1_1	NX1	Nx	08d	27387	4992	3.25	25.311	0.029	-0.527957	-0.373546	G1	5	0.0236857	0.0404786	-10.8744	-3.89733
CTGAATGAGTTCGGTT-1_1	NX1	Nx	08d	21442	4850	7.178	22.176	0.033	0.459389	1.52129	G2M	0	0.40363	0.177399	-1.6937	-0.116066
CTGAATGGTTCCGCAG-1_1	NX1	Nx	08d	15039	4127	5.579	19.649	0.007	-0.392311	-0.7264	G1	2	0.0971621	0.180829	-2.84742	-2.39898
CTGAATGGTTCCGTTC-1_1	NX1	Nx	08d	15403	3987	4.415	20.944	0.019	0.614076	0.752515	G2M	0	0.0544205	0.0404786	-0.784936	2.54984
CTGAATGGTTCGGTAT-1_1	NX1	Nx	08d	39711	5925	2.82	22.266	0.015	-0.240911	-0.563956	G1	8	0	0.893901	5.83164	-9.65382
CTGAATGTCAGACAAA-1_1	NX1	Nx	08d	21130	4682	4.458	24.676	0.024	1.19704	0.130419	S	4	0.0455568	0.0404786	-2.11909	1.54763
CTGAGCGCACACGGTC-1_1	NX1	Nx	08d	14374	3852	5.663	23.334	0.028	0.0438298	-0.690892	S	0	0.0544205	0.0404786	3.91001	-1.07819
CTGAGCGCACTGGACC-1_1	NX1	Nx	08d	13713	3813	2.56	22.49	0.015	-0.131205	1.25485	G2M	0	0.0544205	0.0404786	2.60954	0.49486
CTGAGCGCAGACACCC-1_1	NX1	Nx	08d	17533	4084	5.572	29.544	0.006	0.148068	-0.297385	S	3	0.0239706	0.135375	-3.69992	2.94221
CTGAGCGCAGATCACT-1_1	NX1	Nx	08d	24760	4038	4.075	26.575	0.004	-0.295727	-0.402073	G1	1	0.0320019	0.0404786	4.48935	4.09301
CTGAGCGCATGGCACC-1_1	NX1	Nx	08d	20258	4776	5.662	22.021	0.039	0.497975	-0.771211	S	4	0.0455568	0.0404786	-0.371713	2.06144
CTGAGCGCATTAAAGG-1_1	NX1	Nx	08d	20781	4933	6.544	19.417	0.01	-0.110254	-0.597381	G1	0	0.0544205	0.0404786	-2.01306	0.447026
CTGAGCGCATTGAAGA-1_1	NX1	Nx	08d	16320	4246	6.532	19.804	0.012	0.117826	0.135757	G2M	0	0.0544205	0.0404786	1.4937	1.45895
CTGAGGCCAAACACCT-1_1	NX1	Nx	08d	8540	2799	6.792	17.026	0	-0.368817	-0.598824	G1	0	0.526895	0.135375	-0.780658	-1.03992
CTGAGGCCACTGTCCT-1_1	NX1	Nx	08d	32384	5456	5.988	24.642	0.025	-0.00458609	-0.66394	G1	0	0.529544	0.177399	3.66178	0.364195
CTGATCCAGCAGCACA-1_1	NX1	Nx	08d	19334	4360	3.677	21.341	0.01	-0.341575	-0.0624004	G1	3	0.0239706	0.0404786	5.70883	5.01285
CTGATCCAGGAAGTAG-1_1	NX1	Nx	08d	17472	4345	6.616	23.466	0.034	1.15619	0.423995	S	2	0.0971621	0.0404786	0.555186	-3.6003
CTGATCCAGGTGCTGA-1_1	NX1	Nx	08d	15385	4099	2.853	24.452	0.013	0.0912874	-0.585229	S	2	0.0971621	0.0404786	-3.54658	-3.21264
CTGATCCTCATGTCAG-1_1	NX1	Nx	08d	49017	6443	3.831	22.137	0.016	0.840246	0.855746	G2M	3	0.0239706	0.0404786	-0.357418	4.7255
CTGCAGGAGAGGTTTA-1_1	NX1	Nx	08d	11242	3227	3.042	27.691	0.018	0.00449111	-0.177225	S	0	0.0544205	0.135375	-1.42606	2.51433
CTGCAGGAGATGTTAG-1_1	NX1	Nx	08d	7313	2826	3.747	21.851	0.014	-0.306599	-0.520448	G1	2	0.0971621	0.398273	-4.84535	-1.84281
CTGCAGGAGGAGTCTG-1_1	NX1	Nx	08d	7239	2602	7.128	21.937	0.014	-0.385127	-0.522916	G1	2	0.0971621	0.205118	-3.09672	-0.915798
CTGCAGGCATTGCAAC-1_1	NX1	Nx	08d	23682	5134	6.017	20.775	0.025	0.566538	1.55179	G2M	1	0.0320019	0.0404786	0.960667	-2.31616
CTGCAGGGTGTCATCA-1_1	NX1	Nx	08d	21065	4554	4.097	24.757	0	-0.0759615	-0.638755	G1	1	0.0320019	0.0404786	5.83526	3.51183
CTGCAGGGTGTGCTTA-1_1	NX1	Nx	08d	13535	3631	4.751	25.903	0.007	0.197583	-0.0351218	S	0	0.434845	0.148556	-1.0875	3.63991
CTGCAGGGTTCGAGCC-1_1	NX1	Nx	08d	16669	4305	6.239	22.221	0.024	0.949705	0.991448	G2M	2	0.0971621	0.0404786	-1.43376	-2.25867
CTGCAGGGTTGGTAGG-1_1	NX1	Nx	08d	10909	3387	6.71	19.122	0.009	0.0533482	0.543329	G2M	2	0.0971621	0.303249	-2.3523	0.185298
CTGCATCAGTACGTCT-1_1	NX1	Nx	08d	34273	5891	4.438	20.112	0.026	0.205227	0.0553023	S	0	0.0544205	0.0404786	5.43856	1.72478
CTGCATCGTGTGTGTT-1_1	NX1	Nx	08d	12838	3489	4.152	23.563	0.023	-0.430555	-0.471488	G1	1	0.0320019	0.0404786	3.91319	2.35554
CTGCATCTCGGCCTTT-1_1	NX1	Nx	08d	23160	5191	4.646	18.148	0.03	0.176236	-0.70463	S	0	0.0544205	0.0404786	-1.50616	2.73373
CTGCCATCACTTTATC-1_1	NX1	Nx	08d	19622	4846	4.327	23.239	0.031	1.30704	-0.475951	S	2	0.0971621	0.0404786	-3.879	-1.0429
CTGCCATCAGAGATGC-1_1	NX1	Nx	08d	15408	4106	3.628	21.684	0.052	-0.0286172	-0.503468	G1	4	0.0455568	0.0404786	-1.73186	1.68552
CTGCCATGTGTGTGGA-1_1	NX1	Nx	08d	11606	3510	5.101	22.368	0.017	-0.0913362	-0.541495	G1	0	0.0544205	0.0404786	1.31906	-0.732956
CTGCCTAAGTCATGAA-1_1	NX1	Nx	08d	18166	4664	4.486	21.215	0.028	1.2601	0.168125	S	2	0.0971621	0.0404786	-1.9284	-2.18588
CTGCCTATCGATAACC-1_1	NX1	Nx	08d	34676	6176	4.519	20.334	0.037	-0.17835	-0.676006	G1	0	0.0544205	0.181218	-0.806088	0.11044
CTGCGAGAGCCATGCC-1_1	NX1	Nx	08d	18493	4315	4.65	25.853	0.011	1.27353	1.31427	G2M	2	0.0971621	0.443753	-4.58046	-1.00338
CTGCGAGGTAGGCAAC-1_1	NX1	Nx	08d	39820	5922	4.789	24.721	0.035	0.0306039	-0.695253	S	1	0.0320019	0.0404786	5.91142	5.30162
CTGCGAGTCCTTGGAA-1_1	NX1	Nx	08d	19498	4464	4.395	21.289	0.031	0.272107	1.01916	G2M	0	0.0544205	0.0404786	2.28017	1.52372
CTGCTCAGTTCCGCGA-1_1	NX1	Nx	08d	11363	3416	3.951	22.441	0.026	-0.347886	-0.522405	G1	2	0.0971621	0.205118	-1.14212	-2.89212
CTGCTCATCAGGAAGC-1_1	NX1	Nx	08d	16550	4104	3.118	25.801	0.024	-0.0694571	-0.486267	G1	2	0.0971621	0.135375	-4.82659	-2.40277
CTGCTCATCTACTATC-1_1	NX1	Nx	08d	39062	6532	2.381	23.414	0.02	-0.296418	-0.697879	G1	2	0.0971621	0.328529	-5.08508	-2.51746
CTGGACGAGTATTCCG-1_1	NX1	Nx	08d	16270	4264	3.921	22.385	0	0.289664	1.57237	G2M	2	0.0971621	0.0404786	-0.048475	-4.19581
CTGGACGCATGGCTGC-1_1	NX1	Nx	08d	19983	4719	4.994	21.138	0.03	-0.11772	-0.776718	G1	2	0.0971621	0.0404786	-1.07404	-3.97271
CTGGACGGTACAGAGC-1_1	NX1	Nx	08d	14907	3986	4.414	24.968	0.02	-0.020467	-0.612835	G1	0	0.482653	0.181218	1.89797	-2.3547
CTGGACGTCGGTGAAG-1_1	NX1	Nx	08d	11385	3361	7.176	21.739	0.009	0.11363	-0.58135	S	2	0.0971621	0.443753	-1.62038	-3.48419
CTGGCAGCAACCTAAC-1_1	NX1	Nx	08d	22368	5070	4.654	23.019	0.022	-0.130046	-0.572645	G1	0	0.0544205	0.0404786	3.97185	-1.84908
CTGGCAGGTGATACAA-1_1	NX1	Nx	08d	18026	4569	5.503	20.049	0.011	-0.463972	-0.915849	G1	0	0.0544205	0.0404786	0.309715	-0.790898
CTGGCAGGTGATAGAT-1_1	NX1	Nx	08d	76685	7370	2.514	22.119	0.02	0.219455	-0.533845	S	1	0.0320019	0.0404786	7.61506	4.62649
CTGGCAGTCAAATGAG-1_1	NX1	Nx	08d	15080	3968	5.796	23.203	0.066	-0.499201	-0.468627	G1	4	0.0455568	0.0404786	0.767383	1.37079
CTGGCAGTCCGTACGG-1_1	NX1	Nx	08d	9539	3058	4.938	21.575	0.01	-0.0727875	1.74784	G2M	2	0.0971621	0.0404786	-2.16957	-0.400748
CTGGCAGTCGATCCCT-1_1	NX1	Nx	08d	47106	6523	4.246	15.259	0.019	-0.0781558	1.39481	G2M	1	0.0320019	0.0404786	4.3745	4.82817
CTGGTCTCAATCCTTT-1_1	NX1	Nx	08d	32118	5719	5.966	21.175	0.006	1.01669	-0.185887	S	1	0.0320019	0.177399	1.93198	5.00664
CTGGTCTCACTGTTCC-1_1	NX1	Nx	08d	20969	4748	4.201	25.9	0.033	0.306884	-0.705881	S	2	0.0971621	0.0646147	-2.66317	-0.633388
CTGGTCTCAGAGGAAA-1_1	NX1	Nx	08d	22044	4892	4.486	23.09	0.032	0.701633	0.993476	G2M	4	0.0455568	0.0646147	-0.479455	1.22849
CTGGTCTGTCCACATA-1_1	NX1	Nx	08d	35746	5816	3.989	17.717	0.025	0.32734	-0.0730553	S	1	0.0320019	0.0404786	6.94028	3.68532
CTGGTCTTCTAACGCA-1_1	NX1	Nx	08d	19222	4174	2.69	29.7	0.031	0.29833	0.989562	G2M	2	0.0971621	0.135375	-4.30615	-0.901892
CTGTACCAGTGGTTGG-1_1	NX1	Nx	08d	21496	4656	5.713	22.837	0.028	0.583959	-0.23066	S	3	0.0239706	0.0404786	-1.72075	4.68286
CTGTACCCAGATCACT-1_1	NX1	Nx	08d	21543	4897	4.192	22.62	0.032	-0.0255285	-0.627888	G1	0	0.0544205	0.0404786	-0.497312	0.0376552
CTGTACCCAGATCATC-1_1	NX1	Nx	08d	14868	4216	5.004	18.859	0.02	-0.119994	-0.757387	G1	5	0.0236857	0.0404786	-10.911	-4.37695
CTGTACCTCAGCTCTC-1_1	NX1	Nx	08d	15412	4349	4.01	17.233	0.026	-0.228576	-0.601139	G1	2	0.0971621	0.0404786	-3.59222	-2.175
CTGTACCTCCACACAA-1_1	NX1	Nx	08d	15141	4538	4.392	14.992	0.04	0.130384	1.21231	G2M	2	0.0971621	0.177399	-2.57659	-1.24769
CTGTACCTCGGTTAGT-1_1	NX1	Nx	08d	16837	4046	5.458	22.314	0.006	1.37086	-0.271446	S	0	0.474857	0.0404786	-1.76165	1.16296
CTGTAGAAGCCATGCC-1_1	NX1	Nx	08d	24300	5180	4.128	21.128	0.021	1.05628	-0.0458219	S	4	0.0455568	0.0551106	-1.89888	1.62747
CTGTAGAAGGAGGCAG-1_1	NX1	Nx	08d	18591	4159	5.82	26.126	0.027	-0.40314	-0.346533	G1	2	0.0971621	0.177399	0.686041	-3.8355
CTGTAGAAGTCGAGGT-1_1	NX1	Nx	08d	16021	3840	5.449	27.096	0.006	0.059244	-0.456416	S	0	0.0544205	0.0404786	-1.73531	2.51326
CTGTAGAGTCTCGCGA-1_1	NX1	Nx	08d	12974	3324	4.794	31.316	0.008	-0.0650952	-0.307471	G1	4	0.0455568	0.0404786	-2.47903	0.776721
CTGTAGAGTTTCAGAC-1_1	NX1	Nx	08d	10569	3513	5.128	19.605	0.038	-0.168827	0.298188	G2M	3	0.0239706	0.0404786	-3.50887	2.97109
CTGTATTCACATGTTG-1_1	NX1	Nx	08d	25499	4855	5.902	25.687	0.004	1.30448	0.41998	S	3	0.0239706	0.0646147	-3.29732	3.29668
CTGTATTGTGTACATC-1_1	NX1	Nx	08d	17858	4413	4.609	20.943	0.011	-0.351975	-0.674624	G1	4	0.0455568	0.151645	-0.542932	2.31497
CTGTCGTAGCCGCTTG-1_1	NX1	Nx	08d	19755	4080	0.952	28.899	0.015	-0.277547	-0.46288	G1	8	0	0.0404786	5.84746	-9.66899
CTGTCGTAGTAATTGG-1_1	NX1	Nx	08d	26471	4782	4.518	22.538	0.015	-0.538248	-0.601091	G1	1	0.0320019	0.0404786	4.99265	4.19003
CTGTCGTAGTATGATG-1_1	NX1	Nx	08d	19189	4383	5.446	25.046	0.026	0.00119835	-0.64638	S	0	0.0544205	0.0404786	1.21382	-0.36774
CTGTCGTGTGGCGTAA-1_1	NX1	Nx	08d	7201	2389	6.055	27.163	0.014	-0.217867	-0.42443	G1	1	0.0320019	0.0404786	1.56742	-1.77358
CTGTCGTGTTTGGAAA-1_1	NX1	Nx	08d	13895	3801	5.16	22.886	0.014	0.381814	1.57373	G2M	0	0.0544205	0.0404786	-1.99328	0.542743
CTGTGAAAGCACACAG-1_1	NX1	Nx	08d	18954	4681	4.975	19.22	0.032	-0.534957	-0.63538	G1	2	0.0971621	0.0404786	-2.61683	0.0424429
CTGTGAACATTGTAGC-1_1	NX1	Nx	08d	26786	5522	5.074	21.974	0.034	0.795305	-0.438219	S	5	0.0236857	0.0404786	-10.5239	-4.15483
CTGTGGGCAATACAGA-1_1	NX1	Nx	08d	18126	4344	5.495	21.202	0.028	1.06293	0.611028	S	4	0.0455568	0.0404786	-1.67044	1.74432
CTGTGGGCAGGCTTGC-1_1	NX1	Nx	08d	16119	3906	3.375	31.1	0.012	0.129189	-0.184544	S	5	0.0236857	0.233633	-9.28516	-4.23857
CTGTGGGGTGAATAAC-1_1	NX1	Nx	08d	30141	5477	4.751	21.005	0.013	0.887758	1.22644	G2M	0	0.0544205	0.177399	3.98215	-1.12492
CTGTGGGTCGACGCGT-1_1	NX1	Nx	08d	18594	4161	4.394	26.976	0.043	0.363795	1.7961	G2M	2	0.0971621	0.0404786	-4.28187	-1.38097
CTTACCGAGAGGCTGT-1_1	NX1	Nx	08d	15889	3936	5.834	23.142	0.025	0.522527	-0.0963996	S	0	0.0544205	0.0551106	-0.755599	3.27487
CTTAGGAAGCATGGGT-1_1	NX1	Nx	08d	13729	3733	5.565	24.838	0.022	0.478619	-0.482179	S	3	0.0239706	0.0646147	-2.9307	3.60601
CTTAGGAAGCTACGTT-1_1	NX1	Nx	08d	16877	4347	4.924	22.534	0.03	0.709786	-0.300179	S	0	0.0544205	0.0404786	0.751331	0.395844
CTTAGGAGTCGTAATC-1_1	NX1	Nx	08d	42035	6679	4.905	22.422	0.033	-0.0733215	0.125697	G2M	0	0.0544205	0.0404786	3.32585	-1.5698
CTTAGGATCGTAGAGG-1_1	NX1	Nx	08d	19341	4457	5.305	25.314	0.021	0.254436	1.76557	G2M	0	0.0544205	0.0404786	-0.225096	-0.498213
CTTCCGAAGGTCGACA-1_1	NX1	Nx	08d	30089	5545	6.015	24.165	0.007	0.690508	1.17028	G2M	4	0.0455568	0.0646147	-1.11942	1.39428
CTTCCGATCCTCAGGG-1_1	NX1	Nx	08d	22461	4816	5.423	19.803	0.04	0.693427	-0.512742	S	0	0.0544205	0.0404786	3.18691	0.358225
CTTCCTTAGTCCCTAA-1_1	NX1	Nx	08d	26796	5800	1.87	22.007	0.011	-0.214462	-0.632435	G1	0	0.0544205	0.374009	-1.62121	-2.18582
CTTCCTTCACCTAAAC-1_1	NX1	Nx	08d	20669	5166	5.482	17.253	0.005	0.33061	-0.709766	S	2	0.0971621	0.0404786	-2.10685	-2.40639
CTTCCTTTCCGAGAAG-1_1	NX1	Nx	08d	44422	6832	3.419	22.077	0.009	0.59743	-0.0506441	S	2	0.0971621	0.218419	-0.14677	-3.71638
CTTCGGTCAACATCGT-1_1	NX1	Nx	08d	18528	4036	5.408	25.685	0.005	-0.276175	-0.558226	G1	0	0.0544205	0.0404786	2.48381	1.29957
CTTCGGTTCAATCAGC-1_1	NX1	Nx	08d	17583	4354	4.556	22.078	0.011	-0.33584	-0.780829	G1	0	0.0544205	0.205118	-2.17404	0.271366
CTTCGGTTCGAGTCCG-1_1	NX1	Nx	08d	21698	4344	4.309	32.644	0.014	0.972697	0.712587	S	5	0.0236857	0.250573	-8.46122	-4.26854
CTTCGGTTCTTCCCGA-1_1	NX1	Nx	08d	14228	3876	1.799	23.383	0.007	0.426868	0.927452	G2M	0	0.0544205	0.0404786	-1.93509	2.52982
CTTCTAAAGAGAGAAC-1_1	NX1	Nx	08d	17450	4300	5.221	26.476	0.017	1.59601	-0.0156467	S	3	0.0239706	0.135375	-4.60531	2.03442
CTTCTAACACCTATCC-1_1	NX1	Nx	08d	7949	1834	0.063	46.559	0.013	0.375388	-0.108737	S	5	0.742857	0.181218	-9.97215	-3.36826
CTTCTAACATGACCCG-1_1	NX1	Nx	08d	14443	3841	5.207	22.149	0.014	-0.185987	-0.0083444	G1	3	0.0239706	0.0404786	-4.8241	2.93921
CTTCTAAGTAGCACAG-1_1	NX1	Nx	08d	22054	4650	5.305	24.426	0.027	1.02731	0.605726	S	3	0.0239706	0.0404786	-1.18698	3.83474
CTTCTAATCCTCAGGG-1_1	NX1	Nx	08d	12502	3553	5.599	23.148	0.008	-0.0626859	-0.356419	G1	2	0.0971621	0.0404786	-0.345059	-4.11851
CTTCTAATCGGCCAAC-1_1	NX1	Nx	08d	17962	4280	3.791	22.748	0.017	-0.0775127	-0.332007	G1	4	0.0455568	0.180829	-0.141232	1.91864
CTTCTCTCAAATGAGT-1_1	NX1	Nx	08d	19314	4481	4.603	20.845	0.026	-0.0243058	0.198022	G2M	0	0.0544205	0.0404786	-0.666055	3.00407
CTTCTCTGTCGTGGAA-1_1	NX1	Nx	08d	21658	4173	2.867	27.154	0.009	1.50132	0.639346	S	9	0	0.0404786	-7.57569	-9.53059
CTTCTCTGTGTCATGT-1_1	NX1	Nx	08d	13551	3878	4.834	23.305	0.007	0.132362	-0.527912	S	2	0.0971621	0.0404786	-3.21328	-2.48863
CTTCTCTTCCCTGGTT-1_1	NX1	Nx	08d	25662	5585	3.262	21.97	0.066	0.323995	-0.563925	S	0	0.0544205	0.0404786	1.51201	-0.256226
CTTGAGAAGAGCAAGA-1_1	NX1	Nx	08d	12944	3666	6.976	23.262	0.008	-0.470212	-0.406027	G1	3	0.0239706	0.0404786	-4.54058	3.19419
CTTGAGAAGTCCCGAC-1_1	NX1	Nx	08d	16685	4124	4.561	24.393	0.018	-0.111457	-0.460635	G1	2	0.0971621	0.0404786	1.37918	-3.50515
CTTGAGACATGGCGCT-1_1	NX1	Nx	08d	18689	4484	4.66	20.055	0.011	-0.03035	1.14583	G2M	0	0.0544205	0.0404786	5.40006	2.29273
CTTGAGAGTCTTCTAT-1_1	NX1	Nx	08d	11890	3144	1.716	32.431	0.008	-0.213591	-0.526098	G1	2	0.0971621	0.931102	-4.99048	-1.97165
CTTGAGAGTGGTCTAT-1_1	NX1	Nx	08d	25144	4840	3.396	30.818	0.028	1.15005	0.703808	S	5	0.0236857	0.135375	-8.89951	-4.21584
CTTGAGAGTTTCACTT-1_1	NX1	Nx	08d	17077	4074	3.484	31.364	0.018	-0.0442722	-0.451789	G1	3	0.0239706	0.180829	-4.38587	2.59757
CTTGAGATCCGAGATT-1_1	NX1	Nx	08d	25122	5113	4.797	22.801	0.016	0.548387	1.27496	G2M	4	0.0455568	0.0404786	-1.27497	2.00658
CTTGAGATCTTGCAAG-1_1	NX1	Nx	08d	14722	3913	2.697	23.156	0.014	0.192216	0.537036	G2M	0	0.0544205	0.0404786	0.459526	2.46504
CTTGATTAGCAACCAG-1_1	NX1	Nx	08d	24367	5013	4.289	20.782	0.016	0.358631	1.00081	G2M	0	0.0544205	0.0404786	1.28345	1.43777
CTTGATTAGCTCACTA-1_1	NX1	Nx	08d	15719	4498	7.978	18.653	0.038	-0.168537	-0.474971	G1	5	0.0236857	0.0404786	-9.74591	-4.44019
CTTTCAAAGATAGTGT-1_1	NX1	Nx	08d	57188	7555	5.531	22.138	0.021	0.367426	0.786331	G2M	0	0.0544205	0.218419	-1.21598	0.500542
CTTTCAAAGCAGTAAT-1_1	NX1	Nx	08d	16260	4360	3.893	24.526	0.055	0.232459	-0.475086	S	5	0.0236857	0.0404786	-9.13446	-4.4409
CTTTCAAAGGATACGC-1_1	NX1	Nx	08d	20699	4816	5.116	22.576	0.005	0.510357	1.05084	G2M	3	0.0239706	0.893901	-2.61963	3.52182
CTTTCAACATTAGGAA-1_1	NX1	Nx	08d	32951	5741	4.689	22.558	0.021	0.85381	0.600313	S	6	0	0.931585	-1.50823	-13.6633
CTTTCGGAGCACCGAA-1_1	NX1	Nx	08d	19520	4496	6.009	21.685	0.02	1.41377	-0.0262753	S	3	0.0239706	0.180829	-3.79775	3.65182
CTTTCGGGTCATTCCC-1_1	NX1	Nx	08d	21173	4685	6.499	23.454	0.038	0.393143	-0.313211	S	3	0.0239706	0.0404786	-1.57101	4.65667
GAAACCTCACCAGGTC-1_1	NX1	Nx	08d	38660	5961	5.225	21.712	0.021	0.751916	1.29095	G2M	3	0.0239706	0.110069	-2.65279	4.49921
GAAACCTGTTGCTAGT-1_1	NX1	Nx	08d	9624	2303	3.117	3.45	0	-0.274089	-0.376776	G1	9	0	0.0404786	-7.55503	-8.8951
GAAATGAGTAGGAAAG-1_1	NX1	Nx	08d	11807	3189	6.208	25.011	0	-0.0352921	-0.258437	G1	2	0.0971621	0.0404786	0.570545	-3.29718
GAACACTCACACTGGC-1_1	NX1	Nx	08d	46906	6946	3.663	19.247	0.019	1.23625	0.77905	S	0	0.0544205	0.0404786	-0.882108	-0.421729
GAACGTTGTCCAGAAG-1_1	NX1	Nx	08d	13667	3853	3.139	23.224	0.022	1.34961	0.792724	S	5	0.0236857	0.0646147	-10.8067	-4.70786
GAACGTTGTCTACAAC-1_1	NX1	Nx	08d	26735	5734	6.045	19.256	0.03	0.911732	1.02144	G2M	0	0.477416	0.0404786	-1.81272	-0.629796
GAACGTTGTGTCCATA-1_1	NX1	Nx	08d	14779	3896	4.906	24.393	0.014	0.1084	-0.371212	S	0	0.0544205	0.0404786	4.70363	-1.52365
GAACTGTAGAAGCGAA-1_1	NX1	Nx	08d	19977	4580	5.727	18.371	0.05	-0.0456609	-0.4994	G1	1	0.0320019	0.0404786	2.58301	4.93257
GAACTGTAGCTTAGTC-1_1	NX1	Nx	08d	17348	4799	5.868	16.204	0.012	-0.00525911	-0.723627	G1	0	0.0544205	0.0404786	0.810736	-0.649685
GAACTGTAGTTCTCTT-1_1	NX1	Nx	08d	25759	4894	5.909	21.577	0.008	0.781281	0.991822	G2M	4	0.0455568	0.0646147	-0.976635	1.44286
GAACTGTCAACTGTGT-1_1	NX1	Nx	08d	15835	3964	5.627	22.93	0.032	0.113528	-0.179533	S	0	0.0544205	0.0404786	2.88806	0.404024
GAAGAATAGTTGTAGA-1_1	NX1	Nx	08d	17418	4383	5.563	24.859	0.017	1.10287	0.477495	S	0	0.0544205	0.0404786	0.0909276	-0.372994
GAAGAATCACCTTCGT-1_1	NX1	Nx	08d	47556	6222	3.322	24.432	0.019	0.745469	0.776317	G2M	1	0.0320019	0.0404786	7.03017	4.92841
GAAGAATCACGCACCA-1_1	NX1	Nx	08d	68912	7849	5.36	23.44	0.02	-0.22469	-0.243546	G1	0	0.0544205	0.0404786	2.81612	-0.488741
GAAGAATGTACACTCA-1_1	NX1	Nx	08d	14225	3841	5.624	28.745	0.042	-0.234037	-0.3336	G1	4	0.0455568	0.0646147	-1.71336	1.44932
GAAGAATGTGGGCTCT-1_1	NX1	Nx	08d	16699	4156	3.755	22.331	0.036	0.72796	-0.50948	S	0	0.0544205	0.250573	1.41569	1.55166
GAAGCCCCAGATACTC-1_1	NX1	Nx	08d	14694	3604	4.995	27.351	0.02	-0.0669277	-0.492593	G1	0	0.0544205	0.177399	1.562	1.38519
GAAGCCCGTCAGGCAA-1_1	NX1	Nx	08d	10630	2909	5.927	31.279	0.019	0.0645887	-0.528912	S	2	0.0971621	0.0404786	-1.06198	-2.83599
GAAGGACAGAGCAAGA-1_1	NX1	Nx	08d	31493	5036	3.817	27.355	0.019	-0.334439	-0.468401	G1	7	0.0277228	0.0404786	-7.61349	-6.84224
GAAGGACAGAGTACCG-1_1	NX1	Nx	08d	26602	4759	4.379	27.389	0.011	0.723213	-0.143596	S	1	0.0320019	0.0404786	5.82185	2.51278
GAAGGACAGCGTATAA-1_1	NX1	Nx	08d	22946	4693	4.267	22.148	0.017	0.942028	-0.214796	S	1	0.0320019	0.303249	3.76618	1.50533
GAAGGACCACTCAAGT-1_1	NX1	Nx	08d	22028	4921	6.056	22.19	0.009	0.478735	1.55891	G2M	4	0.0455568	0.0404786	-1.58106	1.82119
GAAGGACCATCGCTAA-1_1	NX1	Nx	08d	32029	5362	3.388	24.266	0.022	0.366349	-0.367699	S	1	0.0320019	0.0404786	7.17088	4.79502
GAAGGACTCTAGAGCT-1_1	NX1	Nx	08d	17625	4191	6.65	28.579	0.011	0.723913	-0.567733	S	3	0.0239706	0.205118	-4.05485	2.44037
GAAGGGTAGCAGCACA-1_1	NX1	Nx	08d	10053	2946	4.765	29.921	0.01	-0.374909	-0.339277	G1	3	0.0239706	0.0404786	-3.83615	2.94683
GAAGGGTAGTTGCCCG-1_1	NX1	Nx	08d	29819	5504	4.829	24.582	0.023	0.47759	1.21905	G2M	0	0.0544205	0.0404786	-0.112847	-0.793072
GAAGGGTCAACTGTGT-1_1	NX1	Nx	08d	14671	3964	5.473	21.505	0.02	0.357366	-0.45013	S	2	0.0971621	0.233633	-2.84262	0.865203
GAAGGGTCACGCGGTT-1_1	NX1	Nx	08d	40627	5991	4.615	21.641	0.015	0.292429	1.15578	G2M	1	0.0320019	0.177399	5.80818	2.91255
GAAGGGTTCGTTCGCT-1_1	NX1	Nx	08d	22090	4376	6.84	23.916	0.009	-0.193161	-0.582536	G1	1	0.0320019	0.0404786	2.03911	5.01181
GAAGTAAAGATTTGCC-1_1	NX1	Nx	08d	35678	5869	4.734	20.124	0.02	0.11561	1.45855	G2M	1	0.0320019	0.0404786	2.411	4.92114
GAAGTAAAGTTGAATG-1_1	NX1	Nx	08d	15644	3717	6.341	27.391	0.013	0.0655254	-0.497317	S	3	0.0239706	0.181218	-3.64526	2.93731
GAAGTAACACTTCTCG-1_1	NX1	Nx	08d	2177	1308	0.138	15.618	0	0.32932	-0.244025	S	5	0.0236857	0.374009	-10.072	-4.73375
GAATAGACATCAGCGC-1_1	NX1	Nx	08d	9260	2426	0.011	32.829	0.054	0.459318	-0.0377813	S	5	0.0236857	0.205118	-9.47993	-4.30583
GAATCACGTACCTAGT-1_1	NX1	Nx	08d	17075	4358	4.404	22.477	0.023	0.228044	-0.489362	S	2	0.0971621	0.0404786	-2.55909	-2.69788
GACACGCAGGGCATGT-1_1	NX1	Nx	08d	13251	3732	6.06	20.602	0.008	0.256255	0.513776	G2M	4	0.0455568	0.0404786	0.204795	2.74712
GACACGCCAGTTAAAG-1_1	NX1	Nx	08d	23765	4961	4.46	25.895	0.004	0.668471	1.17614	G2M	0	0.0544205	0.0404786	2.28898	-1.11449
GACACGCCATGACGTT-1_1	NX1	Nx	08d	28573	5638	4.546	19.648	0.035	-0.457938	-0.54098	G1	0	0.0544205	0.177399	-0.275709	0.296006
GACACGCGTATTCCTT-1_1	NX1	Nx	08d	24158	5160	4.582	19.29	0.037	0.0185615	1.96857	G2M	2	0.0971621	0.0646147	-1.04414	-2.35862
GACACGCGTGCTGATT-1_1	NX1	Nx	08d	17525	4383	5.718	23.641	0.074	-0.09891	-0.675667	G1	0	0.0544205	0.0404786	2.52005	-1.04216
GACAGCCCATTAGGCT-1_1	NX1	Nx	08d	14422	3534	4.826	27.479	0.007	0.26371	0.40916	G2M	4	0.0455568	0.0404786	-1.58601	1.86857
GACAGCCTCCGCGGAT-1_1	NX1	Nx	08d	12743	3729	3.79	24.398	0.024	-0.45695	-0.597365	G1	2	0.0971621	0.181218	-1.55953	-3.11901
GACAGCCTCGTGTGAT-1_1	NX1	Nx	08d	5703	2340	2.665	23.794	0.053	-0.0966533	1.63008	G2M	2	0.0971621	0.0404786	-2.91398	-0.670191
GACAGCCTCTGAATGC-1_1	NX1	Nx	08d	14084	3911	6.504	16.352	0.028	1.05134	0.0274903	S	0	0.0544205	0.303249	1.14308	-0.0231518
GACATCAAGCTTTCTT-1_1	NX1	Nx	08d	30605	5850	4.401	19.376	0.026	0.566904	1.37836	G2M	0	0.0544205	0.0404786	0.779608	-0.991004
GACATCAAGGGCCTCT-1_1	NX1	Nx	08d	14280	3460	3.333	29.944	0.014	-0.124436	-0.407795	G1	2	0.0971621	0.0404786	-4.70431	-1.74223
GACATCAAGTAGTCTC-1_1	NX1	Nx	08d	22202	4802	5.004	21.737	0.014	0.664521	0.881442	G2M	0	0.0544205	0.0404786	3.04176	-0.93719
GACATCAGTAATGATG-1_1	NX1	Nx	08d	35754	6270	2.794	23.583	0.034	-0.0457846	-0.34057	G1	5	0.0236857	0.181218	-11.4396	-4.53877
GACATCAGTGGAACAC-1_1	NX1	Nx	08d	15224	3847	5.419	22.32	0.007	0.0605321	-0.43691	S	0	0.0544205	0.0646147	-1.15692	3.07235
GACCAATAGGGTAGCT-1_1	NX1	Nx	08d	7938	2483	4.573	31.708	0.013	0.0139128	0.753409	G2M	10	0	0.0404786	14.0699	-1.90402
GACCAATCATTCTTCA-1_1	NX1	Nx	08d	20093	4592	7.55	21.848	0.02	0.144634	-0.647799	S	5	0.0236857	0.0404786	-11.3121	-4.65813
GACCAATGTATCGTTG-1_1	NX1	Nx	08d	42842	5842	3.487	23.804	0.016	0.488079	0.905428	G2M	1	0.0320019	0.0404786	6.55573	3.60527
GACCAATGTTCGGACC-1_1	NX1	Nx	08d	32534	5848	4.561	21.458	0.022	0.713679	0.172712	S	5	0.0236857	0.135375	-12.2032	-4.44289
GACCAATTCTCAAAGC-1_1	NX1	Nx	08d	21978	4635	1.051	27.186	0.009	0.468961	0.0753476	S	10	0	0.0646147	14.0703	-1.90479
GACCCAGAGTCACTCA-1_1	NX1	Nx	08d	11877	3689	5.203	13.909	0.008	-0.479444	-0.418398	G1	5	0.0236857	0.0404786	-8.0224	-4.84608
GACCCAGCACGTAACT-1_1	NX1	Nx	08d	14575	4076	7.472	13.276	0.007	-0.165227	-0.782231	G1	0	0.0544205	0.0404786	-1.12852	-1.50593
GACCCAGGTGCCCGTA-1_1	NX1	Nx	08d	18229	4530	4.795	21.318	0.016	-0.158419	1.26395	G2M	4	0.0455568	0.0404786	-0.238428	2.6999
GACCCTTAGAAGCGGG-1_1	NX1	Nx	08d	13577	3823	5.038	23.65	0.022	-0.243848	0.693729	G2M	3	0.0239706	0.0404786	-3.20651	3.08038
GACCCTTCAACACAAA-1_1	NX1	Nx	08d	59685	6559	3.661	29.818	0.012	1.0342	1.24144	G2M	5	0.0236857	0.0404786	-8.53324	-4.23577
GACCCTTCAGGCCCTA-1_1	NX1	Nx	08d	23202	3564	2.676	37.531	0.004	1.4643	0.664265	S	7	0.0277228	0.0404786	-7.51318	-7.11658
GACCCTTTCATCGACA-1_1	NX1	Nx	08d	48916	6530	3.3	20.948	0.025	0.302522	1.28331	G2M	1	0.0320019	0.0404786	5.79082	4.09234
GACCCTTTCCGATCTC-1_1	NX1	Nx	08d	13009	3666	5.788	25.29	0.008	-0.378048	0.242134	G2M	2	0.0971621	0.0404786	1.06751	-3.33124
GACCCTTTCCTCAGAA-1_1	NX1	Nx	08d	55681	7005	3.63	20.479	0.027	0.262578	1.12627	G2M	1	0.0320019	0.931102	5.30444	4.88452
GACCGTGAGGAGAATG-1_1	NX1	Nx	08d	15165	4031	6.726	18.101	0	-0.286587	-0.5098	G1	1	0.0320019	0.0646147	2.30833	3.67208
GACCGTGGTCCACATA-1_1	NX1	Nx	08d	14666	3867	4.268	23.435	0	-0.133695	-0.570887	G1	2	0.0971621	0.0646147	-0.317814	-4.28501
GACCTTCAGCCATTCA-1_1	NX1	Nx	08d	67662	6973	1.793	21.956	0.007	0.00664519	0.290218	G2M	1	0.0320019	0.0646147	7.42667	4.46784
GACCTTCGTAGTTAGA-1_1	NX1	Nx	08d	22472	2361	2.198	37.82	0.004	-0.224625	-0.362484	G1	1	0.0320019	0.0404786	4.8961	4.01637
GACGCTGGTACAGTCT-1_1	NX1	Nx	08d	33408	5851	3.508	18.184	0.018	0.741801	1.09567	G2M	3	0.0239706	0.0404786	-0.570639	5.28332
GACGCTGTCGCTGATA-1_1	NX1	Nx	08d	14545	3593	5.404	25.005	0.007	-0.191778	-0.326767	G1	4	0.0455568	0.0404786	-1.57964	1.83228
GACGTTAAGTCCCGGT-1_1	NX1	Nx	08d	13031	3609	5.341	22.531	0.038	-0.236619	-0.387243	G1	2	0.0971621	0.0404786	-0.676695	-2.30229
GACGTTACAATAACCC-1_1	NX1	Nx	08d	18283	4561	4.737	21.96	0.044	-0.40863	-0.736929	G1	3	0.0239706	0.135375	-4.89789	1.78027
GACGTTAGTGTCATGT-1_1	NX1	Nx	08d	13932	3696	5.125	27.024	0.022	0.24424	-0.221105	S	4	0.0455568	0.0404786	-2.2891	1.22407
GACGTTATCAGCAGAG-1_1	NX1	Nx	08d	12171	3857	3.821	21.436	0.066	0.478103	-0.308461	S	2	0.0971621	0.181218	-4.32217	-2.6504
GACTATGCACGCGTGT-1_1	NX1	Nx	08d	35666	5860	6.426	18.051	0.031	-0.314587	-0.673962	G1	1	0.0320019	0.0404786	3.67934	5.45941
GACTATGCACTGCATA-1_1	NX1	Nx	08d	19088	4567	6.192	21.899	0.042	1.31247	0.0204496	S	0	0.43339	0.177399	-2.34469	0.700917
GACTATGCAGAACCGA-1_1	NX1	Nx	08d	24136	4561	4.011	20.318	0.033	-0.190781	-0.0946742	G1	1	0.0320019	0.0404786	4.28982	4.27984
GACTATGCATAGGTAA-1_1	NX1	Nx	08d	15386	3682	4.589	28.584	0.026	-0.137573	-0.363334	G1	5	0.0236857	0.0404786	-11.6104	-4.16153
GACTATGGTCTTCAAG-1_1	NX1	Nx	08d	17000	4202	3.947	27.182	0.012	0.104672	-0.341781	S	5	0.0236857	0.0404786	-12.39	-4.58659
GACTATGTCGCTGTCT-1_1	NX1	Nx	08d	72547	7724	1.304	23.82	0.029	0.689579	0.77344	G2M	4	0.0455568	0.0404786	0.50946	2.55949
GACTCAATCCGCGATG-1_1	NX1	Nx	08d	14677	3766	3.4	27.308	0.02	0.132004	-0.405265	S	5	0.0236857	0.0646147	-12.0679	-4.49046
GACTCTCCATGAAGGC-1_1	NX1	Nx	08d	18103	4200	4.916	22.151	0.017	-0.291812	-0.570842	G1	0	0.0544205	0.250573	-0.962996	0.114475
GACTGATAGATACAGT-1_1	NX1	Nx	08d	15621	4000	5.473	22.585	0.013	-0.216987	-0.358867	G1	4	0.0455568	0.0404786	-0.487917	2.45507
GACTGATTCACCTCGT-1_1	NX1	Nx	08d	13432	3790	5.159	22.982	0.067	-0.328836	-0.581866	G1	0	0.0544205	0.0404786	-2.11478	0.925875
GACTGATTCGTCCTCA-1_1	NX1	Nx	08d	17943	4587	4.358	21.044	0.011	-0.122336	-0.619357	G1	2	0.0971621	0.0404786	-3.78393	-0.117475
GACTTCCAGGAAGTAG-1_1	NX1	Nx	08d	23072	3562	4.685	39.862	0.013	1.1559	0.401189	S	7	0.0277228	0.0646147	-7.25282	-7.23273
GAGAAATAGTCTTCGA-1_1	NX1	Nx	08d	11330	3269	5.04	26.964	0	-0.313932	0.594261	G2M	3	0.0239706	0.0404786	-3.97656	3.27818
GAGAAATTCGGATACT-1_1	NX1	Nx	08d	25446	5122	6.94	20.321	0.008	0.409821	0.887794	G2M	0	0.0544205	0.0404786	5.27918	1.66139
GAGAAATTCTAGAGCT-1_1	NX1	Nx	08d	16536	3911	5.509	21.408	0.012	-0.260675	-0.550492	G1	5	0.0236857	0.177399	-12.3561	-4.56117
GAGAAATTCTTACCGC-1_1	NX1	Nx	08d	69199	8186	4.928	17.068	0.027	-0.0133614	0.909945	G2M	0	0.0544205	0.177399	-0.0582728	-1.25214
GAGACTTAGTAGCAAT-1_1	NX1	Nx	08d	14918	3797	4.779	26.042	0.054	-0.296448	-0.426007	G1	0	0.0544205	0.0404786	1.7979	-1.20505
GAGACTTGTAAGGAGA-1_1	NX1	Nx	08d	8193	1832	0.928	12.315	0	-0.203159	-0.330915	G1	7	0.0277228	0.257769	-8.25233	-6.11536
GAGACTTTCCATCACC-1_1	NX1	Nx	08d	25490	3852	2.546	31.707	0.016	-0.276509	-0.111106	G1	7	0.0277228	0.205118	-7.81918	-6.75369
GAGAGGTGTGGTTCTA-1_1	NX1	Nx	08d	12416	3519	4.591	26.345	0.024	-0.36789	-0.766625	G1	4	0.0455568	0.443753	-0.46281	2.31477
GAGATGGAGCCGGATA-1_1	NX1	Nx	08d	42065	6261	4.174	18.198	0.021	0.797093	0.467041	S	1	0.0320019	0.0404786	3.61927	5.26924
GAGATGGAGCGCACAA-1_1	NX1	Nx	08d	11807	3352	5.641	25.409	0.017	-0.173787	-0.322868	G1	0	0.0544205	0.0404786	-0.644106	3.03542
GAGATGGAGGATCATA-1_1	NX1	Nx	08d	15233	4022	4.95	21.965	0.007	0.0858048	0.937462	G2M	3	0.0239706	0.0404786	-2.70322	3.14976
GAGATGGAGTTTGTCG-1_1	NX1	Nx	08d	11161	3415	6.872	22.821	0.009	-0.256607	-0.585592	G1	2	0.0971621	0.0404786	-1.48966	-2.86629
GAGATGGCACTAACCA-1_1	NX1	Nx	08d	41125	5924	4.771	19.122	0.039	-0.019268	-0.614869	G1	1	0.0320019	0.0404786	7.29735	4.44953
GAGATGGGTCGAATTC-1_1	NX1	Nx	08d	17709	4057	4.664	26.698	0.006	0.0169509	-0.564124	S	2	0.0971621	0.0404786	0.376555	-3.58807
GAGATGGGTGACTGAG-1_1	NX1	Nx	08d	11532	3080	0.538	30.385	0.017	-0.244765	-0.480671	G1	2	0.0971621	0.218419	-5.02547	-2.54804
GAGCCTGCAGACCGCT-1_1	NX1	Nx	08d	17856	4447	3.248	23.589	0.022	0.409547	1.01011	G2M	5	0.0236857	0.135375	-11.3143	-4.55144
GAGCCTGGTATGCGTT-1_1	NX1	Nx	08d	14433	3549	5.557	28.345	0.021	-0.193751	-0.442377	G1	3	0.0239706	0.0646147	-4.43416	2.71414
GAGCCTGGTTGCGGAA-1_1	NX1	Nx	08d	12811	3856	7.759	19.273	0.016	0.367685	0.316314	S	0	0.0544205	0.180829	-2.72164	1.55047
GAGCTGCAGAGTTGAT-1_1	NX1	Nx	08d	12427	3404	4.289	27.899	0.024	-0.258784	-0.525486	G1	0	0.0544205	0.0404786	-0.327193	-0.332806
GAGCTGCAGGGCCTCT-1_1	NX1	Nx	08d	14221	3617	4.458	27.368	0.007	0.176544	-0.314524	S	0	0.4411	0.0646147	2.70464	-2.6697
GAGCTGCCAATTAGGA-1_1	NX1	Nx	08d	33588	5172	4.001	28.09	0.015	1.43761	0.639506	S	6	0	0.0404786	-0.326335	-13.4516
GAGCTGCGTCTTACTT-1_1	NX1	Nx	08d	32737	5789	6.033	19.672	0.018	0.379469	1.67779	G2M	1	0.0320019	0.180829	5.12882	2.81212
GAGCTGCTCTATCGTT-1_1	NX1	Nx	08d	19428	4722	5.698	23.023	0.036	0.342933	-0.530772	S	3	0.0239706	0.931102	-3.81238	1.19226
GAGGCAAAGAGGACTC-1_1	NX1	Nx	08d	10399	3123	5.808	25.243	0.019	-0.345667	-0.596761	G1	0	0.0544205	0.0404786	-2.15717	0.279577
GAGGCAAAGGTCGACA-1_1	NX1	Nx	08d	16528	3898	3.751	32.333	0.012	0.0334388	-0.548684	S	5	0.0236857	0.0404786	-10.6882	-4.23272
GAGGCAACATGATCTG-1_1	NX1	Nx	08d	14149	3402	1.421	28.907	0.028	-0.182537	-0.500159	G1	2	0.495382	0.443753	-2.1795	0.102351
GAGGCAATCAGGAGAC-1_1	NX1	Nx	08d	27337	5324	4.799	16.992	0.029	0.627473	0.726074	G2M	1	0.0320019	0.0404786	4.2476	3.52002
GAGGCAATCTCCCTAG-1_1	NX1	Nx	08d	15648	4058	4.755	24.476	0.013	-0.265343	-0.796048	G1	2	0.0971621	0.233633	-1.95161	-3.73794
GAGGCCTCAAATGCTC-1_1	NX1	Nx	08d	27843	5665	4.831	20.802	0.036	0.574221	1.61362	G2M	3	0.0239706	0.0404786	-4.64801	1.86083
GAGGCCTCACATGTTG-1_1	NX1	Nx	08d	13439	3746	5.41	25.567	0.03	-0.376039	-0.467687	G1	0	0.0544205	0.0404786	-1.61595	2.43436
GAGGCCTCAGTATTCG-1_1	NX1	Nx	08d	33708	6048	4.969	20.832	0.012	0.952793	1.50502	G2M	3	0.0239706	0.0404786	-4.9296	1.92996
GAGGCCTGTGCGTGCT-1_1	NX1	Nx	08d	17049	4137	4.974	27.04	0.012	-0.355326	-0.785251	G1	0	0.0544205	0.0404786	-1.67582	2.6853
GAGGCCTTCCCTCAAC-1_1	NX1	Nx	08d	53814	6813	3.694	19.406	0.017	0.54013	1.19484	G2M	0	0.0544205	0.0404786	5.02021	1.01749
GAGGGATAGTTGGCGA-1_1	NX1	Nx	08d	17461	4034	2.772	34.036	0.023	-0.269334	-0.630391	G1	3	0.0239706	0.0404786	-3.93656	1.83706
GAGGGATCAGCAGTGA-1_1	NX1	Nx	08d	12565	3390	3.152	28.062	0.016	-0.41781	-0.486857	G1	2	0.0971621	0.205118	-4.92798	-1.95988
GAGGGATTCTTAGGAC-1_1	NX1	Nx	08d	19507	4571	4.86	24.596	0.005	0.397872	-0.695725	S	0	0.0544205	0.0404786	1.8256	-1.85745
GAGGGTAGTCAATCTG-1_1	NX1	Nx	08d	15500	3878	5.361	25.652	0.039	0.0677792	-0.400267	S	2	0.0971621	0.0646147	-1.67066	-1.59467
GAGGGTATCCTGGCTT-1_1	NX1	Nx	08d	15876	4165	3.603	25.309	0.031	0.933414	1.2658	G2M	2	0.0971621	0.205118	-4.85505	-1.98266
GAGTCATAGAAGGTAG-1_1	NX1	Nx	08d	21677	4751	6.182	19.675	0.005	0.149577	0.587138	G2M	0	0.0544205	0.135375	5.23433	1.18415
GAGTCATAGTGTTCCA-1_1	NX1	Nx	08d	17447	4629	5.76	21.058	0.023	0.54489	0.878794	G2M	0	0.0544205	0.0404786	-0.710085	-0.314296
GAGTCATCAATCCTAG-1_1	NX1	Nx	08d	19636	4246	4.263	21.96	0	-0.141653	0.876799	G2M	1	0.0320019	0.0404786	4.43658	4.86047
GAGTCATTCGACGCGT-1_1	NX1	Nx	08d	14595	3908	4.563	22.33	0.041	0.0661711	0.979133	G2M	0	0.0544205	0.0404786	2.2207	1.35873
GAGTCATTCTAGACCA-1_1	NX1	Nx	08d	13171	3560	4.191	24.47	0.053	-0.36305	-0.588444	G1	0	0.40363	0.233633	-1.06479	-0.541123
GAGTCATTCTGTAAGC-1_1	NX1	Nx	08d	8710	2338	0.103	39.92	0.046	1.09806	0.33133	S	2	0.0971621	0.0404786	-3.80675	-1.58698
GAGTCTAAGCCAAGCA-1_1	NX1	Nx	08d	31822	5895	5.191	19.829	0.038	0.128411	1.87112	G2M	0	0.0544205	0.0404786	0.732159	-0.366977
GAGTCTACATGAAGCG-1_1	NX1	Nx	08d	12433	3523	5.976	25.255	0.032	-0.216345	-0.655926	G1	0	0.0544205	0.0404786	1.55024	-1.71913
GAGTCTACATGGACAG-1_1	NX1	Nx	08d	12659	3451	4.977	22.751	0.024	0.0172507	-0.0661971	S	1	0.592208	0.0404786	-6.24154	-6.83825
GAGTGAGAGTTTCGGT-1_1	NX1	Nx	08d	13071	3598	6.556	23.61	0.015	-0.249288	-0.197073	G1	2	0.0971621	0.0404786	-0.842102	-1.34153
GAGTGAGGTGGCTCTG-1_1	NX1	Nx	08d	10490	2020	5.834	9.914	0.01	-0.237495	-0.28263	G1	9	0	0.0404786	-7.61	-8.84357
GAGTGAGTCCACCTGT-1_1	NX1	Nx	08d	11452	3432	5.58	24.756	0.017	0.0378323	-0.485522	S	0	0.0544205	0.0646147	-2.15573	2.98643
GAGTGAGTCTCGTGGG-1_1	NX1	Nx	08d	13687	3959	5.165	25.206	0.022	0.315432	-0.644616	S	2	0.0971621	0.205118	-4.12685	-1.23535
GAGTGTTGTCACTAGT-1_1	NX1	Nx	08d	26011	4995	7.262	24.786	0.023	0.780312	1.09281	G2M	1	0.0320019	0.0404786	3.34497	3.35884
GAGTGTTTCTCCGATC-1_1	NX1	Nx	08d	10871	3272	5.712	26.253	0.009	1.10402	-0.368302	S	4	0.0455568	0.0404786	-2.26831	1.16288
GAGTTACAGGACATCG-1_1	NX1	Nx	08d	12019	3259	4.892	26.358	0.008	-0.33438	-0.151472	G1	0	0.0544205	0.205118	4.23169	-0.183089
GAGTTACCAACGCCCA-1_1	NX1	Nx	08d	73620	7560	2.961	24.352	0.014	-0.366766	-0.773966	G1	1	0.0320019	0.177399	6.01302	5.50056
GAGTTACGTTGGGACA-1_1	NX1	Nx	08d	26960	4954	2.715	21.636	0.022	0.463754	1.05281	G2M	1	0.0320019	0.0404786	3.62175	5.13105
GAGTTGTGTAATTAGG-1_1	NX1	Nx	08d	9643	2903	4.998	24.214	0.031	0.160979	-0.17161	S	2	0.0971621	0.177399	0.374947	-2.81448
GAGTTGTTCACATTGG-1_1	NX1	Nx	08d	18302	4160	4.092	28.303	0.016	-0.102161	2.04211	G2M	2	0.0971621	0.0404786	-4.37758	-1.88089
GAGTTGTTCCACCTCA-1_1	NX1	Nx	08d	13042	3645	4.915	26.737	0.031	-0.0679024	-0.500129	G1	3	0.0239706	0.181218	-4.15124	1.36931
GAGTTTGCAGACACAG-1_1	NX1	Nx	08d	13509	3658	3.805	25.509	0.022	-0.251116	0.0833389	G2M	3	0.0239706	0.0646147	-4.61623	2.23549
GAGTTTGCAGCCTACG-1_1	NX1	Nx	08d	15017	4198	2.737	24.299	0.033	-0.0622095	-0.531793	G1	2	0.0971621	0.0404786	-3.75033	0.270664
GAGTTTGCATGTTACG-1_1	NX1	Nx	08d	35949	6203	5.168	20.254	0.019	0.245652	1.90558	G2M	0	0.0544205	0.0404786	-0.508931	0.64225
GATAGAAGTTTGACAC-1_1	NX1	Nx	08d	28302	5695	3.947	21.256	0.014	0.865057	1.15912	G2M	2	0.0971621	0.135375	-3.95815	-1.34717
GATAGCTTCAGCTAGT-1_1	NX1	Nx	08d	31391	5598	3.539	18.314	0.038	-0.342213	-0.758875	G1	1	0.0320019	0.0404786	6.28348	4.27491
GATCACACAATTGCGT-1_1	NX1	Nx	08d	34998	6149	6.286	13.955	0.029	0.940324	0.634529	S	1	0.0320019	0.0404786	5.24744	4.72144
GATCACACAGAAATCA-1_1	NX1	Nx	08d	27653	5418	4.347	26.525	0.018	0.261618	2.09165	G2M	3	0.0239706	0.0404786	-4.22268	1.87318
GATCACAGTTTACGAC-1_1	NX1	Nx	08d	43515	6892	2.863	20.395	0.016	0.445574	1.50984	G2M	0	0.0544205	0.135375	3.55024	-2.17625
GATCACATCACCTTGC-1_1	NX1	Nx	08d	14224	4057	5.891	19.755	0.014	-0.492927	-0.74529	G1	2	0.0971621	0.0404786	-2.01548	-2.20538
GATCATGAGCGCTGCT-1_1	NX1	Nx	08d	12887	3694	4.291	23.985	0.039	-0.00641654	-0.674088	G1	2	0.0971621	0.0404786	-3.25138	0.222086
GATCATGAGTACGAGC-1_1	NX1	Nx	08d	15861	4281	3.07	21.72	0.038	-0.0328612	-0.550057	G1	2	0.0971621	0.177399	-4.38639	-1.44834
GATCATGTCGCAACAT-1_1	NX1	Nx	08d	20426	4453	4.117	25.658	0.024	0.623913	-0.315312	S	3	0.0239706	0.0404786	-2.03901	3.88494
GATCCCTAGCATCTTG-1_1	NX1	Nx	08d	17665	3640	5.565	39.643	0.017	0.000351969	-0.587464	S	5	0.0236857	0.0404786	-12.0542	-4.27433
GATCCCTAGGTATAGT-1_1	NX1	Nx	08d	30690	5652	5.999	22.408	0.026	0.304918	1.1045	G2M	0	0.0544205	0.177399	3.81186	0.192114
GATCCCTCAGACTCTA-1_1	NX1	Nx	08d	26732	5689	5.869	20.634	0.034	0.429963	1.99737	G2M	3	0.0239706	0.0404786	-4.94785	1.8763
GATCCCTTCCCTGGTT-1_1	NX1	Nx	08d	41582	6489	4.822	22.06	0.022	0.39612	1.50347	G2M	0	0.0544205	0.0404786	4.31906	-1.20711
GATCGTAGTACTCCCT-1_1	NX1	Nx	08d	17649	4315	4.884	23.474	0.017	0.298755	0.556821	G2M	0	0.0544205	0.0404786	3.40686	-2.15656
GATGACTCAGCTACTA-1_1	NX1	Nx	08d	19284	4803	3.251	20.582	0.026	-0.431818	-0.678461	G1	2	0.0971621	0.0404786	-2.09419	-1.98209
GATGACTTCCAGTTCC-1_1	NX1	Nx	08d	37838	5928	4.118	18.447	0.024	0.645797	0.693259	G2M	1	0.0320019	0.0404786	3.22253	5.49366
GATGAGGAGCGACTGA-1_1	NX1	Nx	08d	10002	3049	3.049	25.395	0.02	0.28994	1.72695	G2M	2	0.0971621	0.0404786	-0.612886	-4.0992
GATGAGGAGTAGAATC-1_1	NX1	Nx	08d	14118	4018	5.815	20.782	0.021	-0.306255	-0.519664	G1	3	0.0239706	0.0404786	-3.27381	2.67644
GATGAGGGTTGGCCGT-1_1	NX1	Nx	08d	20608	4580	4.799	24.02	0.034	0.140035	-0.690422	S	4	0.0455568	0.0404786	-0.266795	1.88051
GATGATCAGCTTACGT-1_1	NX1	Nx	08d	10595	3273	5.21	26.522	0	-0.0200822	-0.116583	G1	2	0.0971621	0.205118	-4.6011	-1.05531
GATGATCAGTACAGAT-1_1	NX1	Nx	08d	16423	4333	4.67	20.185	0.037	1.11833	0.54025	S	0	0.477416	0.0404786	-1.85597	-0.0104276
GATGATCCATGTGACT-1_1	NX1	Nx	08d	37270	6136	3.55	20.035	0.008	0.47775	0.527471	G2M	1	0.0320019	0.0404786	2.6435	5.00025
GATGATCGTACTCAAC-1_1	NX1	Nx	08d	25504	5360	4.799	25.949	0.012	0.394298	-0.53218	S	5	0.0236857	0.0404786	-10.1823	-4.21548
GATGATCTCCGCAACG-1_1	NX1	Nx	08d	52337	6993	4.92	22.145	0.031	0.00112121	1.22003	G2M	0	0.0544205	0.931585	4.23396	-0.136109
GATGCTAAGGCCGCTT-1_1	NX1	Nx	08d	19904	4476	4.16	21.945	0.015	1.2353	0.130481	S	1	0.0320019	0.303249	2.89898	4.04103
GATGCTAGTACGTACT-1_1	NX1	Nx	08d	57240	6386	5.949	29.778	0.012	0.172839	1.34824	G2M	9	0	0.233633	-7.44192	-9.70091
GATGCTAGTGTCGCTG-1_1	NX1	Nx	08d	16754	4194	6.548	23.988	0.024	0.174201	-0.506865	S	0	0.0544205	0.0480187	0.653596	-0.708814
GATGCTAGTTGTTGAC-1_1	NX1	Nx	08d	13372	3748	4.554	24.521	0.015	-0.240897	-0.625039	G1	0	0.603113	0.0404786	0.539929	-2.20585
GATGCTATCATCGCCT-1_1	NX1	Nx	08d	23488	4862	3.764	23.948	0.034	-0.0416431	-0.567363	G1	4	0.0455568	0.0404786	-0.7935	0.979916
GATGCTATCCCTCATG-1_1	NX1	Nx	08d	15946	4199	5.418	20.018	0.019	-0.144586	-0.105161	G1	0	0.477416	0.0404786	-2.56143	0.78987
GATGGAGAGTCATGCT-1_1	NX1	Nx	08d	29911	5200	4.072	21.113	0.01	0.931899	1.11695	G2M	5	0.0236857	0.0404786	-11.1152	-3.93456
GATGGAGGTAGTCTTG-1_1	NX1	Nx	08d	28338	5688	6.228	19.712	0.021	0.173145	1.57562	G2M	2	0.0971621	0.0404786	-3.83227	-3.03381
GATGGAGGTCCACTTC-1_1	NX1	Nx	08d	19392	4465	2.403	24.407	0.021	0.0627692	-0.0730174	S	5	0.0236857	0.177399	-12.3099	-4.49245
GATGGAGGTCTACACA-1_1	NX1	Nx	08d	6612	2985	1.013	11.479	0.03	-0.469385	-0.617284	G1	0	0.0544205	0.0404786	-0.787702	-1.85004
GATGGAGGTGAATAAC-1_1	NX1	Nx	08d	16666	4533	5.466	17.935	0.012	0.995789	0.598577	S	3	0.0239706	0.0404786	-3.75861	3.98466
GATGGAGGTTGCTCGG-1_1	NX1	Nx	08d	23218	4955	5.289	17.56	0.009	0.0612111	0.523366	G2M	1	0.0320019	0.106191	2.61032	5.45101
GATGGAGTCCAGTGTA-1_1	NX1	Nx	08d	24633	5150	5.456	21.642	0.016	0.702505	1.24441	G2M	0	0.0544205	0.0404786	3.04037	-0.942373
GATGGAGTCCCTTGGT-1_1	NX1	Nx	08d	14505	3426	5.488	29.748	0	0.00262896	-0.544332	S	2	0.0971621	0.0646147	-4.495	-2.14518
GATGGAGTCGAACCAT-1_1	NX1	Nx	08d	23386	5104	6.53	24.57	0.026	1.00307	0.936064	S	2	0.0971621	0.0404786	-1.45357	-2.16878
GATGGAGTCTGTAAGC-1_1	NX1	Nx	08d	24069	4705	3.851	23.212	0.012	0.0339921	-0.211128	S	1	0.0320019	0.0404786	5.78455	4.59439
GATGTTGAGTGATCGG-1_1	NX1	Nx	08d	10439	3050	8.008	26.276	0.029	-0.232586	0.121251	G2M	2	0.0971621	0.0404786	0.745116	-3.94646
GATGTTGCAGGAGGAG-1_1	NX1	Nx	08d	20150	4127	5.449	24.357	0.025	0.725201	-0.321284	S	1	0.0320019	0.0404786	4.78231	3.77039
GATGTTGGTATTGCCA-1_1	NX1	Nx	08d	20197	4363	3.902	23.038	0.03	-0.160028	-0.552318	G1	4	0.0455568	0.135375	0.357524	2.42274
GATGTTGTCGGACGTC-1_1	NX1	Nx	08d	25961	5177	4.672	16.517	0.015	1.0504	0.96243	S	1	0.0320019	0.0404786	3.7322	5.27276
GATTCGACAACACACT-1_1	NX1	Nx	08d	42081	6391	3.693	23.027	0.017	0.233522	-0.254706	S	0	0.0544205	0.0404786	4.58931	-0.306682
GATTCGACACTGGCCA-1_1	NX1	Nx	08d	13240	3853	5.876	20.317	0.015	-0.411016	-0.708271	G1	2	0.0971621	0.0404786	0.0625195	-4.19496
GATTCGACATCAGCAT-1_1	NX1	Nx	08d	26685	5335	5.213	20.004	0.034	0.742878	0.511174	S	0	0.0544205	0.0404786	4.97212	-1.25484
GATTCGAGTCGCACGT-1_1	NX1	Nx	08d	16833	3828	2.483	28.801	0.018	0.0903182	-0.262722	S	5	0.0236857	0.205118	-12.128	-4.42736
GATTCGAGTTTGTTGG-1_1	NX1	Nx	08d	13771	3939	5.286	22.039	0.015	-0.272637	-0.52395	G1	3	0.0239706	0.0404786	-4.7237	1.50471
GATTCGATCCAGCACG-1_1	NX1	Nx	08d	23634	4891	5.141	23.229	0.008	0.281097	0.069787	S	0	0.0544205	0.177399	5.17941	-0.11147
GATTCGATCCGAGGCT-1_1	NX1	Nx	08d	16708	4321	5.339	21.128	0.006	0.213579	1.47341	G2M	2	0.0971621	0.0404786	-3.33251	-0.542902
GATTCTTAGATTAGCA-1_1	NX1	Nx	08d	25932	5428	5.372	20.457	0.019	0.169505	1.75526	G2M	0	0.0544205	0.0404786	3.73127	-1.83591
GATTCTTGTAGAGTTA-1_1	NX1	Nx	08d	48708	6960	2.513	24.702	0.025	0.742188	1.56225	G2M	0	0.0544205	0.181218	-1.14174	0.822185
GATTCTTGTGTCATTG-1_1	NX1	Nx	08d	15685	4054	6.465	21.734	0.013	-0.0611947	-0.410794	G1	2	0.0971621	0.177399	-1.01555	-2.70751
GATTCTTGTTTAGAGA-1_1	NX1	Nx	08d	22627	5197	6.519	20.922	0.031	-0.149611	-0.521271	G1	2	0.0971621	0.0404786	-2.58801	-0.375769
GATTGGTAGCGCCTCA-1_1	NX1	Nx	08d	21606	4718	3.934	24.225	0.014	-0.00304767	-0.729747	G1	0	0.0544205	0.0646147	1.07443	0.789556
GATTGGTAGTAGAGTT-1_1	NX1	Nx	08d	26904	5376	3.327	20.651	0.026	0.247519	1.57377	G2M	0	0.0544205	0.303249	2.00007	-0.145625
GATTGGTCACGGATCC-1_1	NX1	Nx	08d	17074	4149	3.075	29.94	0.029	-0.116046	-0.564186	G1	0	0.0544205	0.0404786	2.35586	-0.722401
GATTGGTCATACCAGT-1_1	NX1	Nx	08d	20606	5121	5.61	18.111	0.01	0.631575	1.13361	G2M	2	0.0971621	0.0404786	-4.14787	-2.4277
GATTGGTTCAGACCGC-1_1	NX1	Nx	08d	22974	4805	4.727	24.563	0.026	0.306536	-0.618343	S	0	0.0544205	0.0404786	2.60425	0.909761
GATTGGTTCCTCATAT-1_1	NX1	Nx	08d	34421	5210	2.888	26.978	0.003	1.67251	0.536994	S	6	0	0.177399	-0.238453	-13.4049
GATTTCTAGAAAGCGA-1_1	NX1	Nx	08d	21399	4784	2.276	23.996	0.009	1.31431	0.844258	S	2	0.0971621	0.218419	-4.51575	-2.12144
GATTTCTAGCGATCGA-1_1	NX1	Nx	08d	15648	4007	2.032	25.083	0.038	0.340708	-0.464599	S	2	0.0971621	0.443753	-4.7113	-1.75578
GATTTCTGTTTACCAG-1_1	NX1	Nx	08d	16768	4455	5.844	21.207	0.03	-0.0226334	-0.578925	G1	2	0.0971621	0.135375	-1.65371	-3.78482
GATTTCTTCCATCAGA-1_1	NX1	Nx	08d	19048	4582	4.599	22.501	0.005	0.210849	-0.713282	S	0	0.0544205	0.0404786	-2.26823	1.90717
GCAACATCATGATCTG-1_1	NX1	Nx	08d	34953	5874	4.486	18.731	0.029	1.06802	0.406362	S	1	0.0320019	0.0404786	5.3001	3.00044
GCAACATGTGAGGATC-1_1	NX1	Nx	08d	15051	3709	4.897	22.357	0.007	-0.468119	-0.464457	G1	4	0.0455568	0.0404786	-0.232929	1.82441
GCAACCGAGTTCCATG-1_1	NX1	Nx	08d	34912	5877	5.001	17.063	0.029	0.166388	-0.677199	S	1	0.0320019	0.0404786	5.2843	4.45799
GCACATAAGCTCGCAC-1_1	NX1	Nx	08d	21738	5196	4.338	19.335	0.051	0.0845497	-0.696935	S	4	0.0455568	0.0646147	-0.96401	1.79146
GCACATACAATCTCGA-1_1	NX1	Nx	08d	35973	6021	5.02	17.152	0.025	0.360635	1.41725	G2M	1	0.0320019	0.0404786	3.85409	2.60782
GCACATACAATTGCAC-1_1	NX1	Nx	08d	37046	6482	4.316	24.421	0.022	0.624013	0.846537	G2M	3	0.0239706	0.0404786	-3.88642	3.58781
GCACATACACATTCGA-1_1	NX1	Nx	08d	18279	4534	2.763	22.917	0.022	-0.198567	-0.88199	G1	0	0.0544205	0.0404786	4.40851	-0.160768
GCACATAGTATTTCCT-1_1	NX1	Nx	08d	13610	3753	1.227	22.719	0.022	0.486119	-0.693286	S	2	0.509054	0.28906	-2.82326	-0.157228
GCACGGTCACTGGCGT-1_1	NX1	Nx	08d	18768	4612	4.923	23.865	0.053	-0.100718	0.292582	G2M	4	0.0455568	0.0404786	-2.10446	1.41961
GCACGGTGTTTAAGGA-1_1	NX1	Nx	08d	19972	4456	4.752	23.994	0.005	0.676592	-0.211532	S	0	0.0544205	0.443753	0.748186	0.653383
GCACGTGAGTACCGGA-1_1	NX1	Nx	08d	8505	2808	7.09	25.056	0.012	0.100614	-0.198678	S	2	0.0971621	0.135375	-2.99537	-0.211433
GCACGTGAGTACGAGC-1_1	NX1	Nx	08d	17040	4006	3.081	28.04	0.035	0.378306	-0.287929	S	5	0.0236857	0.205118	-10.9668	-4.62339
GCACTAAAGCCTCACG-1_1	NX1	Nx	08d	23667	5235	4.982	15.528	0.021	0.19541	1.2702	G2M	1	0.0320019	0.0404786	2.47627	5.49238
GCACTAACATATGAAG-1_1	NX1	Nx	08d	14547	3790	4.888	27.05	0.021	-0.186105	0.521766	G2M	3	0.0239706	0.0404786	-2.5078	3.33023
GCACTAACATCATCTT-1_1	NX1	Nx	08d	49598	7155	4.252	22.281	0.032	0.0837411	0.300787	G2M	8	0	0.0404786	5.80081	-9.62353
GCACTAACATTGTCGA-1_1	NX1	Nx	08d	51475	7205	3.905	21.286	0.031	0.0367775	-0.27512	S	0	0.0544205	0.344825	3.55319	-2.03582
GCACTAATCTAAACGC-1_1	NX1	Nx	08d	20339	4750	3.373	23.59	0.02	-0.246528	-0.529116	G1	2	0.0971621	0.0404786	-1.07485	-3.40882
GCAGCCAGTGGTAACG-1_1	NX1	Nx	08d	46419	5989	2.413	32.543	0.015	1.12714	1.1727	G2M	5	0.0236857	0.0404786	-8.49286	-4.27984
GCAGCCAGTTCTGAGT-1_1	NX1	Nx	08d	11553	3450	4.527	24.366	0.026	0.0783663	-0.543604	S	5	0.0236857	0.0404786	-12.3504	-4.51767
GCAGCCATCACACCGG-1_1	NX1	Nx	08d	48672	6512	4.631	18.097	0.016	0.00313612	1.15603	G2M	1	0.0320019	0.0404786	6.8694	5.01571
GCAGCCATCGGCTGAC-1_1	NX1	Nx	08d	65441	7898	4.046	22.477	0.021	0.503854	0.526563	G2M	5	0.0236857	0.0404786	-9.8094	-4.42172
GCAGCTGAGGTAGCCA-1_1	NX1	Nx	08d	14108	3807	4.303	26.304	0.007	-0.0242139	-0.657326	G1	3	0.0239706	0.0646147	-3.80414	0.92595
GCAGCTGCAGAGCGTA-1_1	NX1	Nx	08d	11701	3529	5.598	22.032	0.017	-0.375425	-0.0966756	G1	0	0.0544205	0.0404786	-1.94157	2.61763
GCAGCTGGTAAGTTGA-1_1	NX1	Nx	08d	40388	6500	4.91	22.886	0.035	0.574744	-0.437538	S	0	0.0544205	0.177399	3.85021	-1.95017
GCAGCTGGTGTAGTGG-1_1	NX1	Nx	08d	16130	3899	5.846	23.782	0.043	-0.194476	-0.598003	G1	4	0.0455568	0.0404786	-0.383662	1.75927
GCAGGCTAGCACTAGG-1_1	NX1	Nx	08d	16949	4107	5.558	21.441	0.024	1.14885	0.180531	S	1	0.0320019	0.0404786	6.23127	3.32549
GCAGGCTGTGTGACCC-1_1	NX1	Nx	08d	12405	3577	4.256	22.918	0.016	-0.0928612	-0.420147	G1	0	0.0544205	0.0404786	-2.13333	2.73471
GCAGGCTTCATCCTAT-1_1	NX1	Nx	08d	49022	7295	3.6	17.663	0.027	0.966374	-0.227358	S	0	0.0544205	0.0404786	3.06096	-1.31052
GCAGTTAAGAGGGTAA-1_1	NX1	Nx	08d	19034	4513	6.404	24.94	0.037	-0.0179118	-0.703778	G1	3	0.0239706	0.0404786	-4.67345	2.77921
GCAGTTACACTGTGTA-1_1	NX1	Nx	08d	11989	3389	5.655	23.338	0.025	-0.261984	-0.697051	G1	1	0.0320019	0.0404786	2.91363	4.01673
GCAGTTAGTCCGCAGT-1_1	NX1	Nx	08d	18187	4283	5.322	23.517	0.016	-0.0628699	-0.609113	G1	0	0.0544205	0.374009	0.736909	-1.04121
GCAGTTAGTTCCACAA-1_1	NX1	Nx	08d	52274	7169	4.918	28.783	0.027	0.376579	-0.0480748	S	9	0	0.205118	-7.47249	-9.63608
GCAGTTATCTTAGCTT-1_1	NX1	Nx	08d	22338	4823	5.341	20.181	0.022	-0.0909833	0.0576545	G2M	2	0.0971621	0.0646147	2.15915	-3.39584
GCATCGGGTGTAGCAG-1_1	NX1	Nx	08d	32193	5666	5.501	26.195	0.016	-0.475997	-0.669511	G1	0	0.0544205	0.0404786	4.73587	0.728385
GCATCGGGTTTCAGAC-1_1	NX1	Nx	08d	7716	2547	1.14	31.454	0.026	-0.317245	-0.429365	G1	0	0.0544205	0.177399	-1.64938	-0.402244
GCATCTCAGCATGGGT-1_1	NX1	Nx	08d	39369	6287	5.012	20.506	0.038	-0.115172	-0.039823	G1	0	0.0544205	0.0404786	-1.3293	3.10739
GCATCTCAGGAAGTCC-1_1	NX1	Nx	08d	9197	2610	2.066	34.62	0	1.08651	0.836083	S	5	0.0236857	0.205118	-8.55089	-4.24254
GCATCTCAGTGCACCC-1_1	NX1	Nx	08d	14883	4095	4.656	17.402	0	-0.451802	-0.643774	G1	1	0.0320019	0.180829	2.25127	5.01357
GCATCTCCATCTCGTC-1_1	NX1	Nx	08d	44595	6817	3.422	14.618	0.027	0.29881	1.24801	G2M	0	0.0544205	0.0404786	5.83478	2.50249
GCATCTCCATTGCAAC-1_1	NX1	Nx	08d	23564	5055	5.194	23.604	0.038	0.0673646	-0.63766	S	0	0.0544205	0.0404786	1.02205	-0.272907
GCATCTCGTCGCCTAG-1_1	NX1	Nx	08d	16372	4294	4.257	22.447	0.018	-0.101536	0.490366	G2M	4	0.0455568	0.0404786	-1.16559	1.77019
GCATGATAGACTTAAG-1_1	NX1	Nx	08d	34236	5897	4.332	22.809	0.012	0.397944	1.38204	G2M	0	0.529544	0.0404786	2.40171	-2.12529
GCATGATCAAACACCT-1_1	NX1	Nx	08d	12790	3622	4.973	23.409	0.047	-0.00938365	-0.254405	G1	2	0.0971621	0.0404786	-0.625124	-3.9943
GCATGATGTACAGTTC-1_1	NX1	Nx	08d	12909	2097	6.468	33.488	0.008	0.331592	0.18216	S	7	0.0277228	0.233633	-7.61729	-6.80462
GCATGATGTGATAGAT-1_1	NX1	Nx	08d	13604	3473	4.668	24.287	0.015	-0.0362927	-0.228028	G1	0	0.0544205	0.0404786	1.87678	1.50505
GCATGATTCAGACCCG-1_1	NX1	Nx	08d	15089	3966	5.527	22.944	0.007	-0.510604	0.0192535	G2M	3	0.623112	0.135375	-2.69735	1.18581
GCATTAGAGTGGCAGT-1_1	NX1	Nx	08d	10475	3060	6.32	28.095	0.019	-0.461589	-0.603777	G1	2	0.0971621	0.233633	-1.31844	-3.16984
GCATTAGCAGGAGACT-1_1	NX1	Nx	08d	20134	4842	3.79	21.039	0.025	0.0246361	0.374264	G2M	0	0.0544205	0.0404786	-1.22034	3.47028
GCATTAGGTCTGTTAG-1_1	NX1	Nx	08d	14032	3772	5.616	24.009	0.007	0.43997	-0.326443	S	0	0.0544205	0.0404786	1.49047	1.92704
GCATTAGGTGGCTACC-1_1	NX1	Nx	08d	36463	6435	4.577	20.821	0.016	0.879796	1.55427	G2M	5	0.0236857	0.0404786	-10.8455	-4.03772
GCATTAGGTGTTTCTT-1_1	NX1	Nx	08d	18026	4555	4.871	22.529	0.028	-0.448202	-0.708386	G1	0	0.0544205	0.0404786	-0.159164	-1.03215
GCATTAGTCGAGCACC-1_1	NX1	Nx	08d	10439	2930	4.838	29.122	0	-0.341832	-0.423116	G1	2	0.0971621	0.135375	-0.546382	-3.37208
GCCAACGAGAGGTTAT-1_1	NX1	Nx	08d	15478	3649	1.764	31.367	0.026	0.115879	-0.649829	S	2	0.0971621	0.177399	-4.70157	-2.39911
GCCAACGCACGCTGCA-1_1	NX1	Nx	08d	18197	4493	3.528	23.312	0.022	0.217309	1.62982	G2M	3	0.0239706	0.0404786	-2.23082	3.64512
GCCAACGGTAAGAACT-1_1	NX1	Nx	08d	43210	6187	5.038	18.188	0.028	0.184663	0.624218	G2M	1	0.0320019	0.0404786	4.5801	4.18446
GCCAACGGTATCCTCC-1_1	NX1	Nx	08d	20877	4711	4.311	25.286	0.014	0.385316	-0.38478	S	2	0.0971621	0.0404786	-0.78821	-2.87151
GCCAGCAAGAATCGAT-1_1	NX1	Nx	08d	17438	4077	4.169	32.951	0.011	0.693692	0.976255	G2M	5	0.0236857	0.0404786	-8.9548	-4.14435
GCCAGCAAGTTGCTGT-1_1	NX1	Nx	08d	55453	7346	6.234	23.33	0.022	0.605016	0.339413	S	0	0.0544205	0.221679	2.22748	-1.10576
GCCAGCACAGCGGTTC-1_1	NX1	Nx	08d	20541	4790	2.035	24.088	0.015	0.661757	-0.385909	S	2	0.0971621	0.303249	-4.80386	-1.5484
GCCAGCAGTGTCTTAG-1_1	NX1	Nx	08d	17870	4468	6.833	19.944	0.011	0.93868	1.4325	G2M	2	0.0971621	0.0404786	-1.87499	-2.58877
GCCAGCAGTTGGAGAC-1_1	NX1	Nx	08d	20535	2780	1.85	30.597	0.01	-0.247633	-0.310264	G1	7	0.0277228	0.0404786	-8.24399	-6.32498
GCCAGCATCAGTGTGT-1_1	NX1	Nx	08d	13266	3725	6.211	21.642	0.023	-0.129304	-0.695357	G1	1	0.0320019	0.205118	0.86884	-2.80898
GCCAGCATCGGAACTT-1_1	NX1	Nx	08d	15433	4086	6.156	22.16	0.013	-0.398088	-0.654884	G1	3	0.0239706	0.110069	-4.56562	1.43922
GCCAGGTCATAATGAG-1_1	NX1	Nx	08d	32896	5864	5.025	21.69	0.049	0.666886	0.73391	G2M	1	0.0320019	0.0404786	4.18213	5.02538
GCCAGGTGTCGCACAC-1_1	NX1	Nx	08d	35477	5340	7.413	30.406	0.011	1.55408	0.773945	S	5	0.0236857	0.0404786	-8.44072	-4.42467
GCCAGTGAGCGTGCCT-1_1	NX1	Nx	08d	13855	3659	6.684	24.583	0.036	0.0810463	-0.430581	S	2	0.0971621	0.148556	-2.79779	-2.64925
GCCAGTGAGGAATCGC-1_1	NX1	Nx	08d	10368	3073	2.132	28.414	0.039	-0.03357	0.243356	G2M	0	0.4411	0.205118	2.51619	-2.4522
GCCAGTGCACTTCAGA-1_1	NX1	Nx	08d	15302	4092	5.574	20.605	0.033	-0.354889	-0.611894	G1	4	0.0455568	0.177399	-0.285472	2.07158
GCCAGTGTCCGCATAA-1_1	NX1	Nx	08d	13275	3720	3.194	24.557	0.015	-0.201463	-0.557655	G1	2	0.0971621	0.0404786	-1.4805	-1.96504
GCCAGTGTCTCCGAAA-1_1	NX1	Nx	08d	17815	4238	7.14	17.098	0.017	-0.304134	-0.332703	G1	1	0.0320019	0.0404786	2.31407	4.7547
GCCATGGAGGCAGGTT-1_1	NX1	Nx	08d	20892	4806	5.021	24.268	0.029	1.17913	0.0568941	S	4	0.0455568	0.0404786	-0.352002	1.61632
GCCATGGTCGTACACA-1_1	NX1	Nx	08d	3425	1415	3.445	28.321	0.029	0.268793	1.30755	G2M	7	0.0277228	0.233633	-7.94804	-6.48835
GCCATTCAGCCTCTTC-1_1	NX1	Nx	08d	18163	4643	4.691	20.068	0.017	1.41388	-0.196694	S	2	0.0971621	0.177399	-2.49745	-2.75936
GCCATTCAGCGATTCT-1_1	NX1	Nx	08d	16236	4032	2.765	15.872	0.018	-0.300355	-0.526059	G1	5	0.0236857	0.0404786	-10.9721	-4.21401
GCCATTCCATAATCCG-1_1	NX1	Nx	08d	17150	3476	6.671	26.216	0.012	0.279521	-0.266961	S	9	0	0.0404786	-7.50835	-9.63645
GCCCAGAAGGGTCTTT-1_1	NX1	Nx	08d	14993	3902	4.229	24.898	0.027	-0.394653	-0.408369	G1	0	0.0544205	0.0404786	0.569454	0.330113
GCCCAGACAGTCGGAA-1_1	NX1	Nx	08d	8527	1797	2.017	36.097	0.012	-0.188351	-0.291152	G1	7	0.0277228	0.233633	-7.76011	-6.82443
GCCCAGAGTCACTACA-1_1	NX1	Nx	08d	38238	5716	3.494	18.576	0.037	-0.291499	-0.728033	G1	1	0.0320019	0.0404786	6.14991	4.72604
GCCCAGAGTTAAACCC-1_1	NX1	Nx	08d	18999	4459	5.263	21.701	0.011	0.0320322	-0.588592	S	0	0.0544205	0.0404786	5.21386	0.878126
GCCCGAAAGTCCGCCA-1_1	NX1	Nx	08d	16459	4408	5.365	20.311	0.006	-0.0994136	-0.664005	G1	2	0.0971621	0.0404786	-2.67746	-2.61304
GCCCGAAAGTCTCTGA-1_1	NX1	Nx	08d	14393	3918	5.468	21.629	0.028	-0.0728068	-0.581179	G1	2	0.0971621	0.0404786	-3.81338	0.464933
GCCCGAATCTTGGATG-1_1	NX1	Nx	08d	14968	3887	4.797	22.675	0.02	-0.296543	-0.538942	G1	2	0.0971621	0.0404786	-2.55685	-0.729822
GCCGATGAGATCCCAT-1_1	NX1	Nx	08d	19604	4806	4.922	24.347	0.026	0.423758	-0.69784	S	5	0.0236857	0.0404786	-11.1996	-4.10881
GCCGATGAGCACGATG-1_1	NX1	Nx	08d	16794	4260	7.36	22.568	0.024	-0.284989	-0.608946	G1	1	0.0320019	0.0404786	1.05156	-2.58095
GCCGATGAGGGTAATT-1_1	NX1	Nx	08d	22954	5146	5.555	22.589	0.03	1.46431	0.198198	S	4	0.0455568	0.0404786	-1.52368	0.906844
GCCGATGGTGTCTCCT-1_1	NX1	Nx	08d	11792	3529	5.589	20.65	0.051	0.146539	-0.53887	S	0	0.0544205	0.0404786	-0.268611	0.892722
GCCGATGTCAAGAATG-1_1	NX1	Nx	08d	29708	5408	3.804	22.913	0.02	0.656318	1.43106	G2M	0	0.0544205	0.443753	0.90552	1.31369
GCCGATGTCGGAACTT-1_1	NX1	Nx	08d	16087	3845	5.582	26.723	0.012	0.285478	-0.371029	S	4	0.0455568	0.0404786	0.138948	2.95641
GCCGTGAGTCCTCAGG-1_1	NX1	Nx	08d	12702	3582	1.291	29.728	0.024	-0.120778	-0.495324	G1	2	0.0971621	0.205118	-4.97513	-2.18223
GCCGTGATCAAGCCGC-1_1	NX1	Nx	08d	22731	4422	1.109	29.889	0.013	1.23583	1.44448	G2M	2	0.0971621	0.0646147	-4.47486	-1.46461
GCCGTGATCCGATCGG-1_1	NX1	Nx	08d	12855	3531	4.52	22.497	0.008	0.769409	1.00729	G2M	0	0.0544205	0.177399	5.2042	1.79711
GCCTGTTCAGAGTGTG-1_1	NX1	Nx	08d	17186	4315	3.299	24.945	0.023	1.10359	0.827285	S	4	0.0455568	0.205118	-2.41621	0.636112
GCCTGTTTCACGGAGA-1_1	NX1	Nx	08d	11848	3679	4.904	21.177	0.008	-0.0753344	1.1904	G2M	2	0.0971621	0.0646147	0.422011	-4.11229
GCCTGTTTCTATGCCC-1_1	NX1	Nx	08d	18851	4753	2.133	17.729	0.005	-0.459899	-0.443895	G1	0	0.0544205	0.443753	0.831893	0.049417
GCGAGAAAGAGTGTTA-1_1	NX1	Nx	08d	17322	4160	7.447	22.913	0	-0.520593	-0.621979	G1	1	0.0320019	0.0404786	2.7965	2.86968
GCGAGAACAACCGGAA-1_1	NX1	Nx	08d	20391	4489	5.027	23.555	0.02	-0.0144077	-0.693203	G1	4	0.0455568	0.0404786	-0.0849963	2.36134
GCGAGAACAGACGGAT-1_1	NX1	Nx	08d	13986	3307	4.69	31.961	0.014	-0.00522009	0.00142176	G2M	0	0.0544205	0.0404786	4.33494	0.478955
GCGAGAACAGGTTTAC-1_1	NX1	Nx	08d	21286	4669	4.402	24.039	0.023	0.578712	1.08488	G2M	0	0.0544205	0.0404786	-1.01562	3.10482
GCGATCGAGTTAGTAG-1_1	NX1	Nx	08d	12118	3469	6.519	22.809	0.033	-0.306197	-0.474687	G1	0	0.0544205	0.177399	0.445608	-1.3504
GCGATCGGTGCAGGAT-1_1	NX1	Nx	08d	28571	5384	5.03	20.115	0.021	0.0124291	1.23343	G2M	1	0.0320019	0.0404786	3.61799	4.93915
GCGGAAAAGCTAAACA-1_1	NX1	Nx	08d	55112	7059	5.111	20.634	0.016	0.44063	1.00134	G2M	1	0.0320019	0.931102	4.89284	2.63671
GCGGAAACATAGGCGA-1_1	NX1	Nx	08d	15562	3846	6.028	27.586	0.019	-0.157298	-0.0955872	G1	4	0.0455568	0.0404786	-0.86759	1.23518
GCGGAAAGTTCAAGGG-1_1	NX1	Nx	08d	28044	4456	3.295	20.3	0.018	-0.266369	-0.392729	G1	5	0.0236857	0.0404786	-10.9847	-3.86751
GCGGAAAGTTTCCATT-1_1	NX1	Nx	08d	15891	4179	5.368	24.385	0.013	-0.215853	-0.424453	G1	2	0.0971621	0.0646147	-2.34411	-2.79094
GCGGAAATCGAACTCA-1_1	NX1	Nx	08d	12330	3703	5.856	23.504	0.041	0.125943	-0.59591	S	2	0.0971621	0.0404786	-3.49988	-1.85017
GCGGATCAGGGACAGG-1_1	NX1	Nx	08d	19338	4432	5.295	24.113	0.026	0.66313	-0.39862	S	0	0.0544205	0.0404786	3.87253	0.0861872
GCGGATCCAGGCACTC-1_1	NX1	Nx	08d	41794	6756	3.996	19.998	0.036	0.182309	-0.851329	S	4	0.0455568	0.0404786	-0.972192	1.7533
GCGGATCTCCTTTGAT-1_1	NX1	Nx	08d	21631	2610	0.693	23.577	0.005	-0.19749	-0.355273	G1	7	0.0277228	0.0404786	-8.34614	-6.10972
GCGTGCAAGCCAAGGT-1_1	NX1	Nx	08d	18186	4210	4.575	23.458	0	0.674126	0.733376	G2M	1	0.0320019	0.0404786	3.93069	2.16733
GCGTGCAAGTTGTCAC-1_1	NX1	Nx	08d	20619	4767	2.745	22.853	0.015	0.433869	1.08353	G2M	0	0.0544205	0.443753	2.15788	-0.936418
GCGTGCACACCAAATC-1_1	NX1	Nx	08d	17821	4517	5.426	19.084	0.017	0.966073	0.474286	S	0	0.477416	0.0646147	-1.7448	0.315036
GCGTTTCAGTAACGAT-1_1	NX1	Nx	08d	18931	4693	6.048	19.096	0.005	0.750704	1.05514	G2M	2	0.0971621	0.0404786	-1.34921	-3.36041
GCTACAACAGAGGAAA-1_1	NX1	Nx	08d	16651	4257	4.768	23.422	0.024	-0.506302	-0.616882	G1	1	0.0320019	0.0404786	0.635049	-0.810127
GCTACAAGTCAAACGG-1_1	NX1	Nx	08d	12396	3573	4.276	25.097	0.008	-0.105386	-0.303921	G1	0	0.0544205	0.0404786	-0.12526	-0.291901
GCTACAAGTGGAAATT-1_1	NX1	Nx	08d	14839	3875	5.748	22.63	0.007	-0.129831	-0.671097	G1	1	0.574241	0.0646147	1.92979	-2.28582
GCTACAAGTTCTGAGT-1_1	NX1	Nx	08d	16888	4616	6.792	18.51	0.018	-0.0591341	-0.600347	G1	2	0.0971621	0.0404786	-2.00004	-3.42454
GCTACCTAGCCTCGTG-1_1	NX1	Nx	08d	19065	4683	2.234	22.67	0.031	0.213998	1.44449	G2M	2	0.0971621	0.931102	-4.86289	-2.16521
GCTACCTGTGACTAAA-1_1	NX1	Nx	08d	43925	7083	3.861	18.748	0.036	-0.482216	-0.812781	G1	0	0.0544205	0.0404786	-1.39865	-0.24297
GCTACCTGTGATACAA-1_1	NX1	Nx	08d	21149	4784	4.587	20.01	0.019	0.0773401	2.14389	G2M	2	0.0971621	0.0404786	-1.75868	-1.17657
GCTACCTTCAAGGTGG-1_1	NX1	Nx	08d	10270	2990	4.976	29.318	0	-0.0144485	-0.538481	G1	2	0.0971621	0.0404786	-0.530062	-3.02179
GCTACCTTCAGCGCAC-1_1	NX1	Nx	08d	16190	4412	3.663	20.049	0.012	-0.24402	-0.565835	G1	2	0.0971621	0.0404786	-1.49862	-1.74412
GCTCAAAAGCAACCAG-1_1	NX1	Nx	08d	30204	6002	3.976	17.67	0.023	0.151884	1.86052	G2M	0	0.0544205	0.0404786	-0.0307725	-0.401156
GCTGAATCAACGGCTC-1_1	NX1	Nx	08d	23266	4893	4.749	23.287	0.03	-0.0377519	-0.349295	G1	4	0.0455568	0.0404786	-0.344947	2.51132
GCTGAATCACAGTCCG-1_1	NX1	Nx	08d	14459	3943	6.183	22.18	0.007	0.142471	-0.489852	S	2	0.0971621	0.0646147	-2.29466	-3.85397
GCTGAATCATCGATAC-1_1	NX1	Nx	08d	6955	2176	2.013	15.385	0.014	-0.351067	-0.378664	G1	9	0	0.0404786	-7.61984	-8.78465
GCTGCAGAGCAAGTCG-1_1	NX1	Nx	08d	10221	3240	3.747	26.729	0	-0.195972	1.53124	G2M	2	0.0971621	0.398273	-4.36164	-0.835495
GCTGCAGGTGCATGAG-1_1	NX1	Nx	08d	30061	5845	5.928	17.884	0.017	-0.0473428	1.69782	G2M	2	0.0971621	0.177399	-0.381901	-4.2881
GCTGCAGTCGTGGCTG-1_1	NX1	Nx	08d	18937	4277	5.381	24.497	0.021	1.57824	0.0356296	S	1	0.490035	0.0404786	0.557437	-2.01377
GCTGGGTCACAGAGCA-1_1	NX1	Nx	08d	14268	3869	6.392	22.967	0.028	-0.431612	-0.535818	G1	0	0.0544205	0.0404786	4.30254	-1.8772
GCTGGGTCATTGCTTT-1_1	NX1	Nx	08d	4263	1497	0	33.286	0	0.800303	0.696436	S	1	0.441542	0.0404786	-9.83722	-3.34028
GCTTCACAGGGCAGTT-1_1	NX1	Nx	08d	18582	2193	1.109	18.184	0	-0.188565	-0.213534	G1	7	0.0277228	0.198377	-8.26023	-6.10726
GCTTCACCAAACTAGA-1_1	NX1	Nx	08d	26039	5582	7.128	17.643	0.031	0.213353	-0.713061	S	2	0.0971621	0.0404786	0.140098	-3.41535
GCTTCACCACCTTCGT-1_1	NX1	Nx	08d	21744	5187	4.291	22.576	0.014	0.227252	2.30844	G2M	3	0.0239706	0.205118	-4.31572	0.973235
GCTTCACGTAGCTTGT-1_1	NX1	Nx	08d	29024	5633	4.713	23.136	0.024	0.216269	1.68647	G2M	2	0.0971621	0.931585	-1.5372	-2.64024
GCTTGGGAGTAGCCAG-1_1	NX1	Nx	08d	27143	5580	6.543	20.377	0.022	0.587024	1.35286	G2M	0	0.0544205	0.0404786	-1.67291	2.85871
GCTTGGGCACCCTATC-1_1	NX1	Nx	08d	19400	4274	5.052	30.289	0.015	1.0643	0.540505	S	0	0.0544205	0.250573	0.0130167	-1.44763
GCTTGGGGTCGACTTA-1_1	NX1	Nx	08d	29633	5827	4.735	22.266	0.027	-0.00613174	1.99571	G2M	0	0.0544205	0.135375	1.23728	-1.28357
GCTTGGGTCCGCGAGT-1_1	NX1	Nx	08d	37795	5878	2.495	15.425	0.016	0.281984	0.876609	G2M	1	0.0320019	0.0404786	7.46611	4.90967
GCTTGGGTCGATTGAC-1_1	NX1	Nx	08d	19537	4541	3.23	24.297	0.005	0.263494	1.65605	G2M	3	0.0239706	0.110069	-3.25296	3.01978
GCTTTCGGTCGCTCGA-1_1	NX1	Nx	08d	17851	4394	5.305	19.814	0.028	-0.474327	-0.423334	G1	2	0.605018	0.0404786	-1.83226	0.994586
GGAACCCAGCGATTCT-1_1	NX1	Nx	08d	14816	3917	5.17	27.45	0.007	-0.17844	0.497128	G2M	2	0.0971621	0.110069	-2.03885	-2.12564
GGAACCCAGTTGCTGT-1_1	NX1	Nx	08d	16023	2349	2.216	36.81	0.012	-0.329945	-0.18996	G1	7	0.0277228	0.0404786	-7.74009	-6.86665
GGAACCCCAAGTCCCG-1_1	NX1	Nx	08d	19196	4108	3.829	25.073	0.021	0.180155	0.677767	G2M	4	0.0455568	0.177399	0.211891	2.87235
GGAACCCTCGAAGAAT-1_1	NX1	Nx	08d	12853	3521	4.917	26.469	0.008	-0.282129	-0.237572	G1	0	0.0544205	0.0404786	2.16554	-0.08783
GGAACCCTCGTGTCAA-1_1	NX1	Nx	08d	9150	2877	6.284	26.262	0.022	-0.0983772	-0.142921	G1	2	0.0971621	0.135375	1.36339	-3.72311
GGAATCTCAAGAAATC-1_1	NX1	Nx	08d	31570	5881	4.824	22.034	0.029	0.609334	1.39794	G2M	0	0.0544205	0.0404786	3.12472	-0.67928
GGAATCTCACCTGCAG-1_1	NX1	Nx	08d	17061	4409	5.439	19.471	0.029	-0.364326	-0.570346	G1	0	0.0544205	0.374009	-1.09347	2.93239
GGAATCTTCCACGTCT-1_1	NX1	Nx	08d	19607	3724	6.304	35.957	0.005	1.13707	1.07853	S	9	0	0.0404786	-7.49576	-9.60958
GGAATCTTCTGAGGTT-1_1	NX1	Nx	08d	10021	3159	7.684	26.415	0.01	-0.364553	-0.624504	G1	2	0.0971621	0.0404786	-1.54037	-3.05487
GGAATGGGTAGAATGT-1_1	NX1	Nx	08d	24299	5270	1.407	23.219	0.016	-0.0351198	1.69757	G2M	0	0.0544205	0.181218	2.35347	-0.620308
GGAATGGGTAGTCCTA-1_1	NX1	Nx	08d	16357	4167	5.606	20.132	0.018	0.0254866	-0.545006	S	0	0.0544205	0.0404786	-1.63712	2.42081
GGAATGGGTCCTGTCT-1_1	NX1	Nx	08d	22116	4490	5.114	20.935	0	-0.297637	-0.182441	G1	1	0.0320019	0.0404786	3.5726	5.3108
GGACGTCAGCCTTTCC-1_1	NX1	Nx	08d	8788	2862	5.61	22.189	0	-0.0485791	0.132474	G2M	2	0.0971621	0.0404786	0.590204	-4.09039
GGACGTCAGGACTATA-1_1	NX1	Nx	08d	25965	5402	4.753	19.295	0.027	1.08149	0.906545	S	1	0.0320019	0.0404786	2.80286	4.72351
GGACGTCCACCGTCGA-1_1	NX1	Nx	08d	22564	4713	3.838	30.464	0.027	0.543885	-0.411629	S	5	0.0236857	0.0404786	-11.6854	-4.56938
GGACGTCCAGTCCCGA-1_1	NX1	Nx	08d	12426	3666	3.654	25.608	0.032	0.127257	-0.601075	S	2	0.0971621	0.205118	-3.95506	-2.77469
GGACGTCGTCGATTAC-1_1	NX1	Nx	08d	11443	3479	5.619	25.317	0.017	-0.303954	-0.494192	G1	2	0.0971621	0.0404786	-4.44739	-1.73802
GGACGTCGTTGTCCCT-1_1	NX1	Nx	08d	17773	2134	1.592	35.779	0.006	-0.0433627	-0.118645	G1	7	0.0277228	0.233633	-7.81602	-6.76684
GGAGAACAGCGGCTCT-1_1	NX1	Nx	08d	18937	4327	5.872	25.173	0.026	-0.389053	-0.672083	G1	0	0.0544205	0.0404786	-1.49395	2.86419
GGAGAACAGTTTCAGC-1_1	NX1	Nx	08d	18478	4445	6.088	23.428	0.027	-0.3585	-0.622418	G1	2	0.0971621	0.0404786	-1.56875	-3.35115
GGAGAACCAATGGCCC-1_1	NX1	Nx	08d	20284	4581	5.975	21.357	0.005	-0.194108	-0.149489	G1	0	0.434845	0.0404786	-0.873171	3.75288
GGAGAACGTAGTCTTG-1_1	NX1	Nx	08d	11383	2425	0.553	25.081	0.026	-0.394111	-0.107944	G1	7	0.0277228	0.233633	-8.29161	-6.1563
GGAGATGAGTGTTCAC-1_1	NX1	Nx	08d	33159	5866	5.434	23.053	0.033	0.436191	0.293736	S	3	0.0239706	0.931585	-1.33444	4.77951
GGAGATGTCACGATAC-1_1	NX1	Nx	08d	27507	5406	4.835	23.878	0.033	0.420145	-0.189825	S	5	0.0236857	0.205118	-12.0046	-4.39953
GGAGATGTCTGCTCTG-1_1	NX1	Nx	08d	9613	2851	6.626	30.115	0.01	0.197908	-0.365307	S	2	0.0971621	0.135375	-4.68177	-0.657616
GGAGCAATCGTGGGAA-1_1	NX1	Nx	08d	25875	5211	5.43	19.49	0.031	0.135487	1.35057	G2M	1	0.0320019	0.0404786	2.49007	5.56479
GGAGGATAGGCCTTCG-1_1	NX1	Nx	08d	27613	5991	4.842	23.043	0.029	-0.101517	-0.547056	G1	5	0.0236857	0.0404786	-11.3837	-4.40001
GGAGGATAGGTCCGAA-1_1	NX1	Nx	08d	32674	5496	6.228	20.867	0.012	-0.427601	-0.409837	G1	1	0.0320019	0.0404786	6.10115	5.45076
GGAGGTAAGATCACCT-1_1	NX1	Nx	08d	16766	4219	5.678	21.174	0.018	0.238115	0.495925	G2M	0	0.0544205	0.0404786	-0.272569	2.83023
GGAGGTAAGGAAGTCC-1_1	NX1	Nx	08d	13927	3829	6.34	20.844	0.014	-0.294946	-0.522725	G1	1	0.0320019	0.0404786	2.11687	5.32883
GGAGGTATCCACATAG-1_1	NX1	Nx	08d	18481	4199	2.743	33.445	0.027	1.0661	0.00167943	S	5	0.0236857	0.0404786	-9.4049	-4.3045
GGAGGTATCTGGTCAA-1_1	NX1	Nx	08d	18756	4207	3.668	32.006	0.016	0.133835	-0.51264	S	2	0.0971621	0.181218	-4.1238	-2.61661
GGATCTACATGACACT-1_1	NX1	Nx	08d	36701	6125	3.823	18.67	0.022	0.366008	0.878552	G2M	1	0.0320019	0.0404786	3.91113	3.31148
GGATCTAGTACTAACC-1_1	NX1	Nx	08d	21882	2776	1.037	28.613	0.005	-0.113295	-0.168924	G1	7	0.0277228	0.0404786	-8.1259	-6.43782
GGATCTAGTCGTGTTA-1_1	NX1	Nx	08d	29051	5298	7.459	19.607	0.045	0.389583	0.719468	G2M	1	0.0320019	0.0404786	3.13733	4.90337
GGATCTAGTGACGCCT-1_1	NX1	Nx	08d	39852	5988	4.677	19.121	0.018	0.301838	0.81632	G2M	1	0.0320019	0.0404786	5.20701	4.37266
GGATCTATCTAGGCCG-1_1	NX1	Nx	08d	10732	3183	6.01	27.283	0.028	-0.153565	1.07226	G2M	0	0.516083	0.0404786	-1.83583	2.68567
GGATGTTGTCTTCAAG-1_1	NX1	Nx	08d	23326	5212	4.54	20.235	0.026	1.05954	-0.356411	S	2	0.0971621	0.177399	-2.15736	-1.43237
GGCACGTAGATTTGCC-1_1	NX1	Nx	08d	26807	5595	4.1	19.26	0.019	0.24126	1.62523	G2M	0	0.0544205	0.0404786	0.647628	-1.09225
GGCACGTCAAGACTGG-1_1	NX1	Nx	08d	15957	4157	4.092	23.739	0	-0.385875	-0.624306	G1	0	0.0544205	0.0404786	-1.16012	2.84696
GGCACGTGTCTTCCGT-1_1	NX1	Nx	08d	25146	5393	6.49	21.606	0.028	0.424713	1.7781	G2M	0	0.0544205	0.205118	2.29999	-1.21521
GGCACGTGTGGAACCA-1_1	NX1	Nx	08d	24442	5133	5.982	22.49	0.02	0.356365	1.17116	G2M	0	0.0544205	0.0404786	2.35157	0.320659
GGCACGTTCGGAATGG-1_1	NX1	Nx	08d	13272	3704	3.263	26.266	0	0.230214	1.00357	G2M	2	0.580535	0.205118	-3.19044	3.11705
GGCAGTCAGCGACTTT-1_1	NX1	Nx	08d	8168	2731	5.069	23.127	0.012	-0.197165	-0.00661888	G1	2	0.0971621	0.0404786	1.37698	-3.89589
GGCAGTCCAACAGTGG-1_1	NX1	Nx	08d	30766	6052	4.638	18.923	0.023	0.0644959	1.59581	G2M	0	0.0544205	0.177399	2.00395	-1.22473
GGCAGTCCATCTCATT-1_1	NX1	Nx	08d	30334	3746	2.594	34.684	0.003	-0.331412	-0.0904313	G1	7	0.0277228	0.233633	-7.97909	-6.61292
GGCAGTCGTGCCAAGA-1_1	NX1	Nx	08d	10558	3379	6.706	18.763	0.028	-0.393111	-0.364935	G1	2	0.0971621	0.0404786	-3.57108	-2.37912
GGCAGTCTCTAACGCA-1_1	NX1	Nx	08d	20983	4697	5.89	21.174	0	-0.339564	1.55498	G2M	2	0.0971621	0.0404786	-2.48931	-1.54173
GGCGTCAAGCGCCCAT-1_1	NX1	Nx	08d	24807	4733	5.555	19.446	0.016	-0.154756	-0.12942	G1	1	0.0320019	0.0404786	2.86044	5.35088
GGCGTCACAGACAAGC-1_1	NX1	Nx	08d	24746	4792	5.948	25.002	0.032	-0.126684	-0.295447	G1	5	0.0236857	0.177399	-11.0302	-3.90592
GGCGTCACATGATGCT-1_1	NX1	Nx	08d	24512	5308	5.573	21.377	0.024	0.376605	1.94493	G2M	4	0.0455568	0.0404786	-1.73021	1.37059
GGCTGTGAGTCAAGCG-1_1	NX1	Nx	08d	15288	3967	4.121	27.028	0.039	-0.127906	-0.46006	G1	3	0.0239706	0.233633	-3.94115	2.2114
GGCTGTGCATTACGGT-1_1	NX1	Nx	08d	12176	3478	5.568	26.47	0.033	-0.144522	-0.480955	G1	2	0.0971621	0.106191	-2.37891	-2.9043
GGCTTGGAGATTGGGC-1_1	NX1	Nx	08d	26225	4768	3.924	31.15	0.019	1.03813	0.722627	S	5	0.0236857	0.177399	-8.57367	-4.2555
GGCTTGGAGCGTTCCG-1_1	NX1	Nx	08d	14769	3300	6.08	27.416	0	-0.330361	-0.156611	G1	9	0	0.303249	-7.48356	-9.74524
GGCTTGGCACGAGAAC-1_1	NX1	Nx	08d	23472	5110	5.117	21.587	0.038	0.706672	1.19293	G2M	0	0.477416	0.0646147	-1.8439	-0.0479497
GGCTTGGCAGTCCCGA-1_1	NX1	Nx	08d	29224	4853	3.21	23.888	0.014	0.0735193	-0.467685	S	1	0.0320019	0.177399	4.69187	4.64925
GGCTTGGCATAGAAAC-1_1	NX1	Nx	08d	16996	4193	5.648	21.452	0.012	0.316077	-0.34036	S	0	0.0544205	0.0404786	0.556893	0.178445
GGCTTGGGTGTCGATT-1_1	NX1	Nx	08d	12232	3486	5.772	26.3	0.016	0.315719	-0.733757	S	0	0.0544205	0.0404786	1.41761	-0.349548
GGCTTTCTCAGCGCAC-1_1	NX1	Nx	08d	15577	4236	5.052	21.789	0.019	-0.00735604	-0.629762	G1	2	0.0971621	0.0404786	-2.09293	-3.15501
GGGAAGTAGAATAACC-1_1	NX1	Nx	08d	13601	3256	4.382	37.159	0.007	0.455574	0.233307	S	6	0	0.0404786	0.742594	-13.378
GGGAAGTAGCCATGCC-1_1	NX1	Nx	08d	12455	3650	4.994	23.083	0.024	-0.0237682	0.898084	G2M	2	0.0971621	0.0404786	-1.49117	-1.20078
GGGAAGTCAACCTATG-1_1	NX1	Nx	08d	18736	4391	4.174	18.697	0	-0.120896	1.25213	G2M	0	0.0544205	0.0404786	0.496908	3.07803
GGGAAGTCAAGATCCT-1_1	NX1	Nx	08d	22022	4709	4.591	24.149	0.05	0.00527596	-0.753626	S	0	0.0544205	0.0404786	-1.67688	2.65883
GGGAAGTGTTGTTGAC-1_1	NX1	Nx	08d	13240	3673	6.911	23.421	0	-0.481788	-0.516159	G1	2	0.0971621	0.0404786	-2.9812	-1.66388
GGGAAGTTCTCGTGGG-1_1	NX1	Nx	08d	8425	2627	7.798	26.113	0.024	-0.0632964	-0.587369	G1	2	0.430188	0.0404786	-1.53329	0.842928
GGGACAAAGGAATTAC-1_1	NX1	Nx	08d	24683	4936	4.651	22.866	0.032	0.416219	0.622749	G2M	0	0.0544205	0.0404786	5.11911	0.675884
GGGACAAGTGTTTACG-1_1	NX1	Nx	08d	118083	8332	3.585	24.63	0.025	-0.244503	-0.718108	G1	1	0.0320019	0.0404786	7.72428	4.37529
GGGACAATCGCGCTGA-1_1	NX1	Nx	08d	20306	4796	6.604	23.18	0.044	0.185984	-0.626484	S	0	0.0544205	0.0646147	3.89611	-2.12135
GGGACAATCTGACAGT-1_1	NX1	Nx	08d	37348	6289	5.162	16.617	0.037	0.504983	1.34341	G2M	1	0.0320019	0.0404786	2.77189	4.66454
GGGACCTAGGAAAGTG-1_1	NX1	Nx	08d	10000	2705	0.17	34.87	0.02	1.09345	0.628007	S	1	0.441542	0.0404786	-9.92958	-3.41346
GGGACTCCACGACAGA-1_1	NX1	Nx	08d	43269	6244	3.358	24.861	0.021	0.793451	-0.533981	S	0	0.0544205	0.0646147	4.17263	-1.69064
GGGACTCGTTCAGCGC-1_1	NX1	Nx	08d	12829	3654	6.805	19.76	0.031	-0.0567928	0.604519	G2M	0	0.0544205	0.0404786	4.556	0.058199
GGGACTCTCGGCATAT-1_1	NX1	Nx	08d	22042	4265	7.921	28.418	0.018	0.148821	-0.371657	S	1	0.0320019	0.0404786	6.409	5.67862
GGGAGATCAACAGAGC-1_1	NX1	Nx	08d	12795	3535	6.299	23.697	0.055	-0.29952	-0.554697	G1	0	0.0544205	0.0404786	1.21554	0.136813
GGGAGATCAGCGTGAA-1_1	NX1	Nx	08d	26116	5186	5.054	18.575	0.023	0.541468	1.06229	G2M	1	0.0320019	0.0404786	2.59939	5.36109
GGGATCCAGAGCTTTC-1_1	NX1	Nx	08d	10687	2554	4.323	40.236	0.028	0.479382	1.68482	G2M	7	0.0277228	0.181218	-7.00253	-7.25414
GGGATCCAGCAATAGT-1_1	NX1	Nx	08d	16650	4140	2.108	25.85	0.012	1.23099	0.566893	S	2	0.0971621	0.0404786	-4.40502	-2.33595
GGGATCCAGGCAGGTT-1_1	NX1	Nx	08d	16460	4174	5.225	20.96	0.036	-0.0503957	-0.485041	G1	0	0.0544205	0.0404786	-1.3646	2.73852
GGGATCCCAAAGCACG-1_1	NX1	Nx	08d	14983	3799	3.184	23.4	0.047	-0.236009	-0.510751	G1	0	0.0544205	0.931102	0.269839	-0.0449524
GGGATCCTCAATCTTC-1_1	NX1	Nx	08d	22619	5186	4.695	20.412	0.031	0.469255	1.57818	G2M	2	0.0971621	0.0404786	-2.24592	-3.81231
GGGATCCTCCCTCGTA-1_1	NX1	Nx	08d	33935	6249	3.633	19.694	0.024	0.454836	0.250603	S	4	0.0455568	0.0404786	-0.80148	1.71816
GGGATGAAGCTCTTCC-1_1	NX1	Nx	08d	38436	6217	2.058	22.286	0.008	0.242806	1.269	G2M	1	0.0320019	0.0646147	1.15715	-3.66211
GGGATGAGTTGCTCCT-1_1	NX1	Nx	08d	14101	3656	3.305	28.658	0.021	-0.224396	-0.62163	G1	0	0.0544205	0.205118	0.676655	0.0519355
GGGCCATTCCGTGTCT-1_1	NX1	Nx	08d	21718	4880	5.268	22.226	0.005	0.989713	-0.594527	S	4	0.0455568	0.0646147	-1.35083	1.49606
GGGCGTTGTAGACACG-1_1	NX1	Nx	08d	16414	4213	6.927	22.054	0.03	1.34456	-0.0287402	S	4	0.0455568	0.0404786	-1.44668	1.26188
GGGCGTTGTGAGCAGT-1_1	NX1	Nx	08d	10275	2865	2.569	28.925	0	-0.120076	-0.557375	G1	4	0.0455568	0.205118	-1.68853	1.30175
GGGCGTTGTGGTAATA-1_1	NX1	Nx	08d	17330	4210	5.516	21.535	0.029	0.0499134	-0.613692	S	3	0.0239706	0.0404786	-2.65138	3.38157
GGGCGTTTCGACTCCT-1_1	NX1	Nx	08d	35146	6167	4.655	21.411	0.043	0.305377	1.41314	G2M	5	0.0236857	0.0404786	-11.1018	-4.44291
GGGCTACCACGTACAT-1_1	NX1	Nx	08d	26153	5144	5.613	24.165	0.019	-0.44459	-0.583391	G1	4	0.0455568	0.931585	0.900197	1.75398
GGGCTACCACTTACAG-1_1	NX1	Nx	08d	23081	5021	4.705	21.875	0.013	0.0945817	1.72046	G2M	2	0.0971621	0.0404786	-1.05712	-3.67268
GGGCTACGTAATCAAG-1_1	NX1	Nx	08d	13341	3570	6.146	26.295	0.022	-0.168841	-0.612873	G1	2	0.0971621	0.0404786	-0.148509	-3.27472
GGGCTACGTGCCTTTC-1_1	NX1	Nx	08d	15160	3747	4.321	25.053	0.013	0.0208557	0.816284	G2M	1	0.0320019	0.0404786	4.13655	4.61927
GGGCTCAAGAATTCAG-1_1	NX1	Nx	08d	15504	4314	6.405	16.97	0.006	-0.253233	-0.751963	G1	0	0.0544205	0.0404786	0.522276	-1.54152
GGGCTCAAGACGGATC-1_1	NX1	Nx	08d	16814	4058	5.085	24.42	0.012	0.027526	-0.552796	S	0	0.0544205	0.443753	2.06291	1.07671
GGGTAGAAGATCCCAT-1_1	NX1	Nx	08d	17965	4254	4.531	23.752	0.011	0.810073	0.505739	S	4	0.0455568	0.0404786	-0.74695	1.28288
GGGTAGACACTCCACT-1_1	NX1	Nx	08d	19585	4485	3.436	22.982	0.01	0.421171	1.12597	G2M	0	0.0544205	0.0404786	5.04834	0.586946
GGGTAGACAGCCTTCT-1_1	NX1	Nx	08d	23246	5235	5.627	19.836	0.039	0.667994	1.09671	G2M	0	0.0544205	0.0404786	2.18798	-1.26795
GGGTATTCACCAGACC-1_1	NX1	Nx	08d	20495	4702	4.094	21.464	0.029	0.221062	-0.168395	S	3	0.0239706	0.0646147	-1.70922	3.77325
GGGTATTCAGTAACCT-1_1	NX1	Nx	08d	19018	4252	4.264	24.608	0.011	-0.145318	-0.593203	G1	4	0.0455568	0.135375	-1.75571	1.2193
GGGTCACAGGCGTTAG-1_1	NX1	Nx	08d	24032	4890	4.211	22.915	0.025	0.838742	0.756861	S	0	0.0544205	0.0404786	1.18046	1.4115
GGGTCACCAGCTACTA-1_1	NX1	Nx	08d	15583	4036	4.46	26.035	0.013	0.303933	-0.441896	S	0	0.0544205	0.0404786	0.381179	-1.91196
GGGTCACGTATGGAGC-1_1	NX1	Nx	08d	45561	6093	2.443	28.474	0.007	1.01956	1.43766	G2M	6	0	0.0404786	0.273082	-13.5197
GGGTCTGCACTTCATT-1_1	NX1	Nx	08d	36330	6031	3.011	21.932	0.019	0.444328	1.09794	G2M	0	0.0544205	0.0404786	1.30416	-0.574279
GGGTCTGGTGGACCAA-1_1	NX1	Nx	08d	53375	6919	3.901	27.65	0.011	1.16105	1.11011	S	5	0.0236857	0.893901	-8.46113	-4.34485
GGGTGAATCGCATTGA-1_1	NX1	Nx	08d	13655	3768	6.51	14.464	0.015	-0.138859	1.02916	G2M	8	0	0.0404786	5.81314	-9.63969
GGGTGTCGTCCAAGAG-1_1	NX1	Nx	08d	21698	4823	5	20.845	0.023	0.0572381	-0.455413	S	1	0.0320019	0.0646147	0.496405	-4.04623
GGGTGTCGTGTGTCCG-1_1	NX1	Nx	08d	31741	5774	4.666	22.58	0.022	-0.165814	-0.723702	G1	0	0.0544205	0.0404786	1.55572	0.347118
GGGTGTCTCGGAGTGA-1_1	NX1	Nx	08d	22034	4896	4.062	19.715	0.032	-0.31149	-0.594017	G1	5	0.0236857	0.0404786	-11.1091	-3.96208
GGGTTATGTGGACTAG-1_1	NX1	Nx	08d	12811	3395	5.542	25.353	0.008	-0.343309	-0.477474	G1	2	0.0971621	0.0404786	-1.25988	-3.46462
GGGTTATGTTCGTAAC-1_1	NX1	Nx	08d	14455	3497	6.157	26.475	0.035	-0.207406	-0.60545	G1	3	0.0239706	0.303249	-2.10612	3.15005
GGGTTATTCATGCCGG-1_1	NX1	Nx	08d	38032	6372	5.522	22.457	0.021	0.632861	0.207219	S	3	0.0239706	0.0404786	-4.86977	3.17327
GGGTTTAAGTTGGCTT-1_1	NX1	Nx	08d	19269	4627	4.645	25.512	0.026	-0.0631137	-0.447158	G1	5	0.0236857	0.0404786	-11.0553	-4.13212
GGGTTTACATGCCGGT-1_1	NX1	Nx	08d	26149	5123	4.321	22.731	0.011	1.16269	0.616072	S	0	0.0544205	0.0404786	4.38826	0.120441
GGGTTTAGTTGGCCGT-1_1	NX1	Nx	08d	12817	3598	6.367	27.776	0.016	0.31971	-0.352237	S	2	0.0971621	0.233633	-4.68682	-2.18853
GGGTTTATCACGGGAA-1_1	NX1	Nx	08d	21991	4573	3.565	23.623	0.014	0.892241	0.125338	S	1	0.0320019	0.0404786	3.22546	5.36946
GGGTTTATCCACATAG-1_1	NX1	Nx	08d	17034	4324	6.375	19.367	0.012	0.0715598	-0.628402	S	4	0.397687	0.0404786	-2.95122	0.226178
GGGTTTATCCTGATAG-1_1	NX1	Nx	08d	37225	5604	4.645	22.055	0.046	0.954803	0.261593	S	1	0.0320019	0.0404786	3.82801	5.33324
GGTAACTAGCTCCGAC-1_1	NX1	Nx	08d	37560	6572	3.525	21.038	0.032	0.202737	-0.415465	S	3	0.0239706	0.218419	-2.69725	3.10804
GGTAACTCACATGGTT-1_1	NX1	Nx	08d	14827	4070	5.598	22.58	0.027	-0.197624	-0.766632	G1	2	0.0971621	0.0404786	-2.71826	-2.5441
GGTAACTGTTCCTAAG-1_1	NX1	Nx	08d	13594	3626	5.524	22.826	0.037	-0.118129	-0.334351	G1	0	0.0544205	0.0404786	-1.55318	2.22515
GGTAACTGTTTCAGAC-1_1	NX1	Nx	08d	22691	5156	5.994	22.419	0.026	1.34296	0.0893343	S	0	0.0544205	0.0404786	0.939883	-1.28586
GGTAATCCAAGGGTCA-1_1	NX1	Nx	08d	24673	4906	3.429	21.493	0.004	0.200366	0.873217	G2M	1	0.0320019	0.0404786	6.19005	4.75922
GGTAATCTCTCACCCA-1_1	NX1	Nx	08d	47154	6086	2.608	18.817	0.004	-0.183116	-0.637911	G1	1	0.0320019	0.0404786	7.7484	4.66266
GGTAGAGCATGGGCAA-1_1	NX1	Nx	08d	11346	3280	6.919	29.87	0.018	-0.150335	-0.384007	G1	5	0.0236857	0.181218	-11.2323	-4.63371
GGTAGAGGTATGAAGT-1_1	NX1	Nx	08d	23901	5032	4.816	24.145	0.013	0.985058	0.630104	S	0	0.0544205	0.0404786	3.6225	-0.108845
GGTAGAGGTCTGTAAC-1_1	NX1	Nx	08d	11242	3447	5.124	21.277	0.018	0.0260786	0.401789	G2M	0	0.0544205	0.443753	1.22202	1.94735
GGTAGAGGTGGAGGTT-1_1	NX1	Nx	08d	9074	2128	0.132	35.508	0	1.08416	0.329602	S	8	0	0.0646147	5.75896	-9.60261
GGTCACGCAAACCATC-1_1	NX1	Nx	08d	17778	4578	5.287	19.98	0.067	0.0225051	-0.504571	S	2	0.0971621	0.0404786	-0.485774	-4.31534
GGTCACGCATATGGCT-1_1	NX1	Nx	08d	46572	6776	4.423	19.662	0.006	0.547231	1.23045	G2M	1	0.0320019	0.0404786	5.94623	4.99585
GGTCACGGTGCGCTCA-1_1	NX1	Nx	08d	19470	4322	4.648	24.895	0.021	-0.233464	-0.736592	G1	4	0.0455568	0.0404786	-0.0991638	2.26674
GGTCACGGTTGTCCCT-1_1	NX1	Nx	08d	34748	6153	4.797	21.216	0.029	-0.0102795	-0.754976	G1	0	0.0544205	0.177399	2.68552	-1.30469
GGTCACGTCGTTCCCA-1_1	NX1	Nx	08d	24303	5074	6.061	21.084	0.012	0.104857	1.63667	G2M	2	0.0971621	0.135375	0.303455	-4.00492
GGTCTGGCAAATGGTA-1_1	NX1	Nx	08d	34345	6084	5.509	16.678	0.061	0.652235	1.09372	G2M	0	0.0544205	0.0404786	2.93625	-0.155059
GGTGAAGAGATACATG-1_1	NX1	Nx	08d	14846	3826	3.873	25.017	0.013	-0.163286	-0.650541	G1	3	0.0239706	0.181218	-3.82981	1.98256
GGTGAAGGTCACAATC-1_1	NX1	Nx	08d	26257	5400	3.812	21.107	0.023	0.526371	1.06347	G2M	0	0.0544205	0.0404786	3.15578	1.0077
GGTGAAGGTCTGATCA-1_1	NX1	Nx	08d	13413	4044	4.846	20.57	0.022	-0.431873	-0.443465	G1	2	0.0971621	0.0646147	0.0881043	-4.05888
GGTGAAGGTGCAATAA-1_1	NX1	Nx	08d	52842	7230	5.079	20.807	0.021	-0.101588	0.93203	G2M	0	0.0544205	0.0404786	1.63528	1.7069
GGTGAAGTCTGAGATC-1_1	NX1	Nx	08d	21094	4563	4.959	25.51	0.019	-0.0353425	-0.435398	G1	5	0.0236857	0.0404786	-11.9242	-4.23424
GGTGATTAGGGAGGGT-1_1	NX1	Nx	08d	12700	1937	2.606	47	0	-0.300129	-0.104037	G1	7	0.0277228	0.257769	-7.16852	-7.28085
GGTGATTCAGAACATA-1_1	NX1	Nx	08d	16751	4065	1.97	28.93	0.03	-0.0365278	-0.811851	G1	2	0.0971621	0.110069	-0.669795	-3.27958
GGTGATTCAGGCTTGC-1_1	NX1	Nx	08d	13141	3670	3.417	13.804	0.03	-0.0344744	-0.180561	G1	5	0.0236857	0.893901	-11.3931	-4.64039
GGTGATTTCTCGCTTG-1_1	NX1	Nx	08d	28053	5477	5.058	18.39	0.021	1.29557	0.848201	S	1	0.0320019	0.0404786	3.73687	2.0815
GGTGATTTCTCGTTTA-1_1	NX1	Nx	08d	29257	5704	4.854	20.901	0.017	0.461063	1.04092	G2M	0	0.0544205	0.931585	-0.363139	0.906146
GGTGGCTAGCTATCCA-1_1	NX1	Nx	08d	17144	4529	5.961	17.51	0.035	0.112151	-0.627334	S	2	0.0971621	0.0404786	-3.18552	-0.00213606
GGTGGCTGTTACTCAG-1_1	NX1	Nx	08d	26088	4996	4.761	17.295	0.05	0.259939	-0.575982	S	1	0.0320019	0.0404786	2.45479	5.21895
GGTGGCTTCGAGTGAG-1_1	NX1	Nx	08d	28783	4780	5.993	28.354	0.01	-0.469598	-0.686345	G1	1	0.0320019	0.0404786	6.24532	5.39354
GGTGTCGCACTCCCTA-1_1	NX1	Nx	08d	20447	4742	1.501	23.011	0.02	-0.00119199	-0.707179	G1	2	0.0971621	0.0404786	-4.10315	-2.73336
GGTGTCGGTTCGGTCG-1_1	NX1	Nx	08d	17818	4095	4.434	25.065	0.022	0.13686	0.166378	G2M	0	0.0544205	0.0404786	-0.515219	3.17014
GGTGTCGGTTCGTAAC-1_1	NX1	Nx	08d	14660	3833	5.989	27.79	0.041	-0.0539516	-0.532941	G1	2	0.0971621	0.0404786	-3.80581	-2.83019
GGTGTCGTCGAATGCT-1_1	NX1	Nx	08d	45969	6254	3.642	19.439	0.02	0.671099	1.48854	G2M	5	0.0236857	0.0404786	-10.9658	-3.88987
GGTGTCGTCTCTCCGA-1_1	NX1	Nx	08d	20692	4654	4.775	23.772	0.01	0.981541	0.513727	S	4	0.0455568	0.0646147	-0.203854	2.0353
GGTGTTAAGAAACCAT-1_1	NX1	Nx	08d	10569	3286	6.642	25.291	0.047	-0.255903	-0.390906	G1	2	0.0971621	0.0404786	-3.87795	-0.313857
GGTGTTAAGTAGGGTC-1_1	NX1	Nx	08d	15898	3567	3.315	27.242	0.031	0.0817294	-0.327054	S	8	0	0.177399	5.77215	-9.63124
GGTGTTACAGCGTGCT-1_1	NX1	Nx	08d	21512	4692	6.141	25.562	0.005	0.0548669	-0.531932	S	3	0.0239706	0.0404786	-4.89066	2.21247
GGTTAACCAAATTAGG-1_1	NX1	Nx	08d	13252	3812	3.501	21.74	0.023	0.157378	1.44916	G2M	0	0.0544205	0.205118	2.57306	0.678613
GGTTAACCAGTATGAA-1_1	NX1	Nx	08d	12070	3333	5.402	24.648	0.05	-0.341916	-0.311286	G1	3	0.0239706	0.233633	-2.01488	2.9993
GGTTAACGTCCAAATC-1_1	NX1	Nx	08d	58938	7273	4.871	24.787	0.022	-0.182161	-0.590114	G1	0	0.0544205	0.0404786	2.863	-0.0832033
GGTTAACTCAGACTGT-1_1	NX1	Nx	08d	11757	1930	2.339	19.997	0.009	-0.206612	-0.207092	G1	7	0.0277228	0.233633	-8.21516	-6.22372
GGTTCTCAGTTTCGAC-1_1	NX1	Nx	08d	44286	5781	4.534	20.889	0.007	0.0609935	-0.493606	S	1	0.0320019	0.0646147	7.77632	4.48793
GGTTCTCTCATTACCT-1_1	NX1	Nx	08d	15601	3881	5.891	24.607	0.019	-0.422603	-0.529412	G1	2	0.0971621	0.0404786	-0.519293	-3.1501
GGTTGTAAGGTACCTT-1_1	NX1	Nx	08d	47560	6303	2.464	23.602	0.023	1.4128	0.60406	S	6	0	0.0404786	-1.1434	-13.5562
GGTTGTACACCTGCTT-1_1	NX1	Nx	08d	29754	5122	2.675	20.098	0.007	1.07931	0.0729581	S	1	0.0320019	0.0646147	5.95237	3.62969
GGTTGTAGTGAATTAG-1_1	NX1	Nx	08d	27813	5300	5.44	23.507	0.014	1.48924	0.357567	S	0	0.0544205	0.0404786	3.55112	-0.288214
GGTTGTAGTGGGTCAA-1_1	NX1	Nx	08d	13140	3696	6.393	24.711	0.008	-0.212515	-0.379666	G1	3	0.0239706	0.233633	-4.51645	1.05186
GGTTGTATCAGGACGA-1_1	NX1	Nx	08d	35312	5888	5.851	20.636	0.025	1.16306	0.767866	S	1	0.0320019	0.0404786	3.8678	5.28434
GTAACACCACTAACCA-1_1	NX1	Nx	08d	14109	3848	4.983	25.785	0.014	-0.37891	-0.351558	G1	4	0.466115	0.0646147	-1.9813	1.79831
GTAACACCATCGCTCT-1_1	NX1	Nx	08d	14516	3926	5.49	20.047	0.007	-0.205895	-0.597882	G1	2	0.0971621	0.0404786	-2.12422	0.213992
GTAACCAAGTCGTCTA-1_1	NX1	Nx	08d	15157	4042	4.282	22.274	0	0.43504	-0.451463	S	4	0.0455568	0.0404786	-0.545484	2.62786
GTAACCACACCCAACG-1_1	NX1	Nx	08d	20014	4451	4.982	25.727	0.02	-0.152136	2.01199	G2M	2	0.0971621	0.0404786	-1.37505	-3.70533
GTAACCATCCGACGGT-1_1	NX1	Nx	08d	46845	6647	4.154	21.315	0.03	0.437713	1.38489	G2M	0	0.0544205	0.0404786	-0.435229	2.47133
GTAAGTCAGTCACTCA-1_1	NX1	Nx	08d	37937	5936	4.766	19.788	0.029	-0.0674093	1.26617	G2M	0	0.0544205	0.0404786	5.15182	0.354655
GTAAGTCAGTCTAACC-1_1	NX1	Nx	08d	17661	4560	5.385	20.503	0.04	-0.0908536	-0.68181	G1	2	0.0971621	0.177399	-0.941317	-1.93538
GTAAGTCGTATGTCCA-1_1	NX1	Nx	08d	21592	4370	6.433	23.722	0	0.127904	0.0957946	S	0	0.0544205	0.0646147	2.95786	-2.58971
GTAAGTCGTGGGCTTC-1_1	NX1	Nx	08d	17864	4394	2.681	20.264	0.045	0.0600833	1.77452	G2M	2	0.0971621	0.303249	-0.468781	-2.79533
GTAAGTCGTTGCCAAT-1_1	NX1	Nx	08d	31039	5230	3.95	30.771	0.006	0.997687	1.01403	G2M	5	0.0236857	0.181218	-8.49704	-4.27751
[truncated: 10,622 more rows]

## Sheet: 2-Cluster assignment
	ClRes_0_Clustering	ClRes_0.05_Clustering	ClRes_0.1_Clustering	ClRes_0.15_Clustering	ClRes_0.2_Clustering	ClRes_0.25_Clustering	ClRes_0.3_Clustering	ClRes_0.35_Clustering	ClRes_0.4_Clustering	ClRes_0.45_Clustering	ClRes_0.5_Clustering	ClRes_0.55_Clustering	ClRes_0.6_Clustering	ClRes_0.65_Clustering	ClRes_0.7_Clustering	ClRes_0.75_Clustering	ClRes_0.8_Clustering	ClRes_0.85_Clustering	ClRes_0.9_Clustering	ClRes_0.95_Clustering	ClRes_1_Clustering	ClRes_1.05_Clustering	ClRes_1.1_Clustering	ClRes_1.15_Clustering	ClRes_1.2_Clustering	ClRes_1.25_Clustering	ClRes_1.3_Clustering	ClRes_1.35_Clustering	ClRes_1.4_Clustering	ClRes_1.45_Clustering	ClRes_1.5_Clustering
AAACCCACACCCAACG-1_1	0	2	3	4	5	5	6	7	6	7	7	10	10	11	13	11	15	14	14	15	15	16	16	16	16	15	14	16	17	15	18
AAACCCACACTCGATA-1_1	0	0	0	2	2	2	2	2	2	1	1	1	1	1	2	1	1	0	1	1	0	2	13	11	12	12	11	14	13	13	12
AAACCCACAGTCTCTC-1_1	0	0	0	0	0	0	0	0	0	0	0	0	0	0	0	3	0	4	0	3	1	0	10	0	1	0	0	0	0	1	13
AAACCCACAGTGAGCA-1_1	0	3	4	5	6	6	7	9	9	9	9	8	8	8	10	9	11	9	17	18	18	19	19	19	19	19	19	19	20	20	21
AAACCCATCGTCGATA-1_1	0	0	0	0	4	4	5	5	5	6	6	6	6	6	7	7	7	7	7	6	5	5	5	5	6	5	6	4	5	5	5
AAACGAAGTGGTTCTA-1_1	0	0	2	3	3	3	3	3	3	2	2	2	2	5	4	5	5	5	4	5	3	3	2	2	2	2	1	6	2	2	1
AAACGCTGTAGCTAAA-1_1	0	1	1	1	1	1	1	1	1	4	4	4	4	2	5	6	4	6	5	4	6	4	4	4	4	3	3	3	8	9	3
AAAGAACCAGCTACTA-1_1	0	0	2	3	3	3	3	3	3	2	2	2	2	5	4	5	5	5	4	5	3	3	2	2	2	2	1	9	2	2	1
AAAGAACGTGCTCTCT-1_1	0	0	0	2	2	2	2	2	2	1	1	1	1	1	2	1	1	0	1	0	0	2	3	3	5	4	2	2	4	4	7
AAAGGATCACCCATAA-1_1	0	0	0	0	0	0	0	0	0	0	0	0	0	0	6	2	6	1	6	1	4	6	6	7	3	6	5	5	3	3	6
AAAGGATGTGAGACGT-1_1	0	0	2	3	3	3	3	3	3	2	2	2	2	5	4	5	5	5	4	5	3	3	2	2	2	2	1	6	2	2	1
AAAGGATGTGTGGTCC-1_1	0	0	0	2	2	2	2	2	2	1	1	1	1	1	2	1	1	0	1	0	0	2	3	3	5	4	2	2	4	4	2
AAAGGGCAGTCACTGT-1_1	0	1	1	1	1	1	1	1	1	3	3	3	3	3	1	0	2	2	2	8	7	7	7	6	7	7	7	7	6	7	8
AAAGGGCCAATCCTTT-1_1	0	0	0	0	0	0	0	0	0	0	0	0	0	0	0	3	0	4	0	3	1	0	1	0	1	0	0	0	0	1	4
AAAGGGCGTTACTCAG-1_1	0	0	0	0	0	0	0	0	0	0	0	0	0	0	0	3	0	4	0	3	1	0	1	0	1	0	0	0	0	1	4
AAAGGTACAGAGTAAT-1_1	0	0	0	0	4	4	5	5	5	6	6	6	6	6	7	7	7	7	7	6	5	5	5	5	6	5	6	4	5	5	5
AAAGGTACATACCAGT-1_1	0	0	2	3	3	3	3	3	3	2	2	2	2	5	4	5	5	5	4	5	3	3	2	2	2	2	1	6	2	2	1
AAAGGTAGTACAGTCT-1_1	0	0	0	0	0	0	4	4	4	5	5	5	5	4	3	4	3	3	3	2	2	1	0	1	0	1	4	1	1	0	0
AAAGGTAGTCCACGCA-1_1	0	0	0	0	0	0	4	4	4	5	5	5	5	0	3	3	3	3	3	2	2	0	0	0	0	1	4	0	0	0	13
AAAGGTATCCGCCTAT-1_1	0	0	0	2	2	2	2	2	2	1	1	1	1	1	2	1	1	0	1	0	0	2	3	3	5	10	2	2	4	4	2
AAAGTCCCAAACCACT-1_1	0	0	0	2	2	2	2	2	2	1	1	1	1	1	2	1	1	0	1	1	0	13	13	11	12	12	11	14	13	13	12
AAAGTCCCATAAGCGG-1_1	0	0	0	0	0	0	0	0	0	0	0	0	0	0	0	3	0	4	0	3	1	0	1	0	1	0	0	0	0	1	4
AAAGTCCGTACGCTTA-1_1	0	0	0	2	2	2	2	2	2	1	1	1	1	1	2	1	1	0	1	0	0	2	3	3	5	4	2	2	4	4	2
AAAGTGAAGTAACAGT-1_1	0	1	1	1	1	1	1	8	8	4	4	4	4	2	5	6	13	12	11	13	6	12	12	13	14	13	12	13	14	12	16
AAAGTGATCCCATACC-1_1	0	0	2	3	3	3	3	3	3	2	2	2	2	5	4	5	5	5	4	5	3	3	2	2	2	2	1	9	2	2	1
AAAGTGATCTCCTACG-1_1	0	2	3	4	5	5	6	7	6	7	7	9	9	9	11	10	12	10	12	12	13	14	14	15	13	14	13	15	15	14	15
AAATGGACAGGAAGTC-1_1	0	2	3	4	5	5	6	7	6	7	7	9	9	9	11	10	12	10	12	12	13	14	14	15	13	14	13	15	15	14	15
AAATGGAGTATCTCTT-1_1	0	0	0	0	4	4	5	5	5	6	6	6	6	6	7	7	7	7	7	6	5	5	5	5	6	5	6	4	5	5	5
AAATGGATCGATAACC-1_1	0	0	0	0	0	0	4	4	4	5	5	5	5	4	3	4	3	3	3	2	2	1	0	1	0	1	4	1	1	0	0
AACAAAGCAAAGGGCT-1_1	0	2	3	4	5	5	6	7	6	7	7	10	10	11	13	11	15	14	14	15	15	16	16	16	16	15	14	16	17	15	18
AACAAAGCACGTCTCT-1_1	0	1	1	1	1	1	1	1	1	4	4	4	4	2	5	6	4	6	5	4	6	4	4	4	4	3	3	3	8	9	3
AACAAAGGTACGAGCA-1_1	0	0	0	0	0	0	0	0	0	0	0	0	0	0	6	2	6	1	6	1	4	6	6	7	3	6	5	5	3	3	6
AACAAAGTCTACTTCA-1_1	0	0	0	0	0	0	0	0	0	0	0	0	0	0	0	3	0	4	0	3	1	0	1	0	1	0	0	0	0	1	4
AACAACCAGCGTCGAA-1_1	0	0	0	0	0	0	0	0	0	0	0	0	0	0	0	3	0	4	0	3	1	0	1	0	1	0	0	0	0	1	13
AACAACCAGGAACGTC-1_1	0	0	0	2	2	2	2	6	7	8	8	7	7	7	8	8	8	8	8	10	10	10	8	8	9	10	9	10	10	6	10
AACAACCAGGTCTACT-1_1	0	0	0	0	0	0	0	0	0	0	0	0	0	0	0	2	9	1	9	9	11	9	10	9	10	9	16	11	9	17	7
AACAACCAGTAGGGTC-1_1	0	0	0	0	0	0	0	0	0	0	0	0	0	0	6	2	6	1	6	1	4	6	6	7	3	6	5	5	3	3	6
AACAACCCACCGTCTT-1_1	0	0	2	3	3	3	3	3	3	2	2	2	2	5	4	5	5	5	4	5	3	3	2	2	2	2	1	6	2	2	1
AACAAGACACGGAAGT-1_1	0	0	0	1	1	1	1	1	1	3	3	3	3	3	1	0	2	2	2	7	8	8	9	10	8	8	8	8	7	8	9
AACAAGACACGTACTA-1_1	0	0	2	3	3	3	3	3	3	2	2	2	2	10	12	12	14	11	13	14	14	15	15	14	15	16	15	9	16	16	17
AACAAGACATAACAGA-1_1	0	0	0	2	2	2	2	6	7	8	8	7	7	7	8	8	8	8	8	10	10	10	8	8	9	10	9	10	10	6	10
AACAAGAGTCTTCTAT-1_1	0	1	1	1	1	1	1	1	1	3	3	3	3	3	1	0	2	2	2	8	7	7	7	6	7	7	7	7	6	7	8
AACAAGATCGAGTCCG-1_1	0	0	0	2	2	2	2	2	2	1	1	1	1	1	2	1	1	0	1	0	0	2	3	3	5	4	2	2	4	4	2
AACACACCATGGTACT-1_1	0	0	0	0	0	0	4	4	4	5	5	5	5	4	3	4	3	3	3	2	2	1	0	1	0	1	4	1	1	0	0
AACACACTCTCTATGT-1_1	0	0	0	0	4	4	5	5	5	6	6	6	6	6	7	7	7	7	7	6	5	5	5	5	6	5	6	4	5	5	5
AACAGGGCATCTCAAG-1_1	0	0	0	0	0	0	0	0	0	0	0	0	0	0	0	3	0	4	0	3	1	0	1	0	1	0	0	0	0	1	4
AACAGGGGTCAGCTTA-1_1	0	0	0	0	0	0	0	0	0	0	0	0	0	0	6	2	6	1	6	1	4	6	6	7	3	6	5	5	3	3	6
AACAGGGGTTCGGTTA-1_1	0	0	0	0	4	4	5	5	5	6	6	6	6	6	7	7	7	7	7	6	5	5	5	5	6	5	6	4	5	5	5
AACAGGGGTTTGATCG-1_1	0	1	1	1	1	1	1	1	1	3	3	3	3	2	1	0	4	6	5	4	7	4	7	6	7	3	7	3	8	9	3
AACAGGGTCTTCGGTC-1_1	0	0	0	0	0	0	0	0	0	0	0	0	0	0	6	2	6	1	6	1	4	6	6	7	3	6	5	5	3	3	6
AACCAACAGAGGTATT-1_1	0	2	3	4	5	5	6	7	6	7	7	9	9	9	11	10	12	10	12	12	13	14	14	15	13	14	13	15	15	14	15
AACCAACAGCGTGAAC-1_1	0	0	0	0	4	4	5	5	5	6	6	6	6	6	7	7	7	7	7	6	5	5	5	5	6	5	6	4	5	5	5
AACCAACCAGATGCGA-1_1	0	0	0	0	0	0	4	4	4	5	5	5	5	4	3	4	3	3	3	2	2	1	0	1	0	1	4	1	1	0	0
AACCAACGTCACCGAC-1_1	0	0	0	0	4	4	5	5	5	6	6	6	6	6	7	7	7	7	7	6	5	5	5	5	6	5	6	4	5	5	5
AACCAACTCCACGTAA-1_1	0	0	0	0	4	4	5	5	5	6	6	6	6	6	7	7	7	7	7	6	5	5	5	5	6	5	6	4	5	5	5
AACCACAGTCAGGCAA-1_1	0	0	2	3	3	3	3	3	3	2	2	2	2	5	4	5	5	5	4	5	3	3	2	2	2	2	1	6	2	2	1
AACCATGCAACTAGAA-1_1	0	0	0	0	0	0	0	0	0	0	0	0	0	0	0	3	0	4	0	3	1	0	1	0	1	0	0	0	0	1	4
AACCATGGTCCACTCT-1_1	0	2	3	4	5	5	6	7	6	7	7	9	9	9	11	10	12	10	12	12	13	14	14	15	13	14	13	15	15	14	15
AACCATGTCCTTGAAG-1_1	0	2	3	4	5	5	6	7	6	7	7	10	10	11	13	11	15	14	14	15	15	16	16	16	16	15	14	16	17	15	18
AACCCAAAGTTACGAA-1_1	0	2	3	4	5	5	6	7	6	7	7	9	9	9	11	10	12	10	12	12	13	14	14	15	13	14	13	15	15	14	15
AACCCAACAAGGCAAC-1_1	0	1	1	1	1	1	1	1	1	4	4	4	4	2	1	0	4	6	5	4	9	4	4	4	4	3	3	3	12	11	14
AACCCAACACCAGCTG-1_1	0	0	0	0	0	0	4	4	4	5	5	5	5	4	3	4	3	3	3	2	2	1	0	1	0	1	4	1	1	0	0
AACCCAACAGGTCAAG-1_1	0	1	1	1	1	1	1	1	1	3	3	3	3	3	1	0	2	2	2	8	7	7	7	6	7	7	7	7	6	7	8
AACCCAATCGACCATA-1_1	0	0	0	0	4	4	5	5	5	6	6	6	6	6	7	7	7	7	7	6	5	5	5	5	6	5	6	4	5	5	5
AACCTGATCATTACTC-1_1	0	4	5	6	9	9	10	12	12	12	12	13	13	15	16	16	18	17	19	20	20	21	21	21	21	21	21	21	22	22	23
AACCTGATCATTTGCT-1_1	0	0	0	0	0	0	0	0	0	0	0	0	0	0	6	2	6	1	6	1	4	6	6	7	3	6	5	5	3	3	6
AACCTTTAGGTAAACT-1_1	0	0	0	0	0	0	0	0	4	0	5	0	5	0	0	3	0	4	3	2	1	0	0	1	0	0	0	1	0	1	0
AACCTTTCACACCAGC-1_1	0	0	0	0	4	4	5	5	5	6	6	6	6	6	7	7	7	7	7	6	5	5	5	5	6	5	6	4	5	5	5
AACCTTTCAGGGTCTC-1_1	0	1	1	1	1	1	1	8	8	4	4	4	4	2	5	6	13	12	11	13	6	12	12	13	14	13	12	13	14	12	16
AACCTTTGTGGATTTC-1_1	0	0	2	3	3	3	3	3	3	2	2	2	2	10	12	12	14	11	13	14	14	15	15	14	15	16	15	9	16	16	17
AACCTTTTCGGCTGGT-1_1	0	0	0	0	0	0	4	4	4	5	5	5	5	4	1	4	3	3	3	7	2	1	9	1	0	8	8	1	1	0	9
AACGAAACAACGTTAC-1_1	0	0	0	0	0	0	0	0	0	0	0	0	0	0	0	3	0	4	0	3	1	0	1	0	1	0	0	0	0	1	4
AACGAAATCCTCAGGG-1_1	0	3	4	5	6	6	7	9	9	9	9	8	8	8	10	9	11	9	15	16	16	17	17	17	17	17	17	17	18	18	19
AACGGGAAGCGTCAGA-1_1	0	2	3	4	5	5	6	7	6	7	7	9	9	9	11	10	12	10	12	12	13	14	14	15	13	14	13	15	15	14	15
AACGGGAAGCTCCACG-1_1	0	0	0	0	4	4	5	5	5	6	6	6	6	6	7	7	7	7	7	6	5	5	5	5	6	5	6	4	5	5	5
AACGGGAAGGATAATC-1_1	0	0	0	0	0	0	0	0	4	0	0	0	0	0	0	3	0	4	0	3	1	0	1	0	1	0	0	0	0	1	4
AACGGGAGTTCGGCGT-1_1	0	0	0	0	4	4	5	5	5	6	6	6	6	6	7	7	7	7	7	6	5	5	5	5	6	5	6	4	5	5	5
AACTTCTCAGAGGAAA-1_1	0	0	0	0	4	4	5	5	5	6	6	6	6	6	7	7	7	7	7	6	5	5	5	5	6	5	6	4	5	5	5
AACTTCTGTAGGGAGG-1_1	0	0	0	2	2	2	2	2	2	1	1	1	1	1	9	1	10	0	10	11	12	11	11	12	11	11	10	12	11	10	11
AACTTCTTCCCATTCG-1_1	0	4	5	6	7	7	8	10	10	10	10	11	11	13	14	14	16	15	16	17	17	18	18	18	18	18	18	18	19	19	20
AAGAACAAGCAGGCAT-1_1	0	0	0	0	4	4	5	5	5	6	6	6	6	6	7	7	7	7	7	6	5	5	5	5	6	5	6	4	5	5	5
AAGAACATCTTCCCGA-1_1	0	4	5	6	7	7	8	10	10	10	10	11	11	13	14	14	16	15	16	17	17	18	18	18	18	18	18	18	19	19	20
AAGACAACAACAACAA-1_1	0	0	0	0	0	0	4	4	4	5	5	5	5	4	3	4	3	3	3	2	2	1	0	1	0	1	4	1	1	0	0
AAGACAACATTGACAC-1_1	0	2	3	4	5	5	6	7	6	7	7	9	9	9	11	10	12	10	12	12	13	14	14	15	13	14	13	15	15	14	15
AAGACAATCTCGCTCA-1_1	0	2	3	4	5	5	6	7	6	7	7	9	9	9	11	10	12	10	12	12	13	14	14	15	13	14	13	15	15	14	15
AAGACTCCAAGAGTAT-1_1	0	0	2	3	3	3	3	3	3	2	2	2	2	5	4	5	5	5	4	5	3	3	2	2	2	2	1	6	2	2	1
AAGATAGTCAGACATC-1_1	0	0	0	0	0	0	0	0	0	0	0	0	0	0	0	2	9	1	9	9	11	9	10	9	10	9	16	11	9	17	7
AAGCATCAGAGCAACC-1_1	0	0	2	3	3	3	3	3	3	2	2	2	2	5	4	5	5	5	4	5	3	3	2	2	2	2	1	9	2	2	1
AAGCATCAGGGAACAA-1_1	0	0	2	3	3	3	3	3	3	2	2	2	2	5	4	5	5	5	4	5	3	3	2	2	2	2	1	6	2	2	1
AAGCATCCACGCAGTC-1_1	0	3	4	5	6	6	7	9	9	9	9	8	8	8	10	9	11	9	15	16	16	17	17	17	17	17	17	17	18	18	19
AAGCATCTCAAGGAGC-1_1	0	0	0	2	2	2	2	2	2	1	1	1	1	1	2	1	1	0	1	0	0	2	3	3	5	4	2	2	4	4	2
AAGCCATCAAACAGGC-1_1	0	0	2	3	3	3	3	3	3	2	2	2	2	5	4	5	5	5	4	5	3	3	2	2	2	2	1	9	2	2	1
AAGCCATCAGCGTAGA-1_1	0	0	0	0	0	0	4	4	2	5	1	5	5	4	9	1	3	3	10	7	2	11	11	1	11	11	10	12	11	10	9
AAGCCATGTCGCTCGA-1_1	0	0	0	0	0	0	0	0	0	0	0	0	0	0	0	3	0	4	0	3	1	0	1	0	1	0	0	0	0	1	4
AAGCGAGAGACTCTAC-1_1	0	1	1	1	1	1	1	1	1	3	3	3	3	3	1	0	2	2	2	8	7	7	7	6	7	7	7	7	6	7	8
AAGCGAGGTACCGGCT-1_1	0	0	0	0	4	4	5	5	5	6	6	6	6	6	7	7	7	7	7	6	5	5	5	5	6	5	6	4	5	5	5
AAGCGAGGTCCTGTTC-1_1	0	0	0	0	0	0	0	0	0	0	0	0	0	0	0	3	0	4	0	3	1	0	1	0	1	0	0	0	0	1	4
AAGCGAGGTTGCCGAC-1_1	0	0	0	0	4	4	5	5	5	6	6	6	6	6	7	7	7	7	7	6	5	5	5	5	6	5	6	4	5	5	5
AAGCGAGTCGTTGCCT-1_1	0	0	0	0	4	4	5	5	5	6	6	6	6	6	7	7	7	7	7	6	5	5	5	5	6	5	6	4	5	5	5
AAGCGAGTCTCCCTAG-1_1	0	0	2	3	3	3	3	3	3	2	2	2	2	5	4	5	5	5	4	5	3	3	2	2	2	2	1	6	2	2	1
AAGCGTTAGGGTGAAA-1_1	0	1	1	1	1	1	1	1	1	4	4	4	4	2	5	6	4	6	5	4	6	4	4	4	4	3	3	3	8	9	3
AAGCGTTCATCGGATT-1_1	0	0	0	2	2	2	2	2	2	1	1	1	1	1	9	1	10	0	10	1	12	11	11	12	11	11	10	12	11	10	11
AAGGAATTCCATCTGC-1_1	0	0	0	0	0	0	0	0	0	0	0	0	0	0	6	2	6	1	6	1	4	6	6	7	3	6	5	5	3	3	6
AAGGTAAGTATCTCTT-1_1	0	0	2	3	3	3	3	3	3	2	2	2	2	5	4	5	5	5	4	5	3	3	2	2	2	2	1	9	2	2	1
AAGTACCAGAGCAAGA-1_1	0	0	0	1	1	1	1	1	1	3	3	3	3	3	1	0	2	2	2	7	8	8	9	10	8	8	8	8	7	8	9
AAGTACCCACACGTGC-1_1	0	0	0	0	4	4	5	5	5	6	6	6	6	6	7	7	7	7	7	6	5	5	5	5	6	5	6	4	5	5	5
AAGTACCTCGCAATTG-1_1	0	0	0	0	0	0	4	4	4	5	5	5	5	0	3	3	3	3	3	2	2	0	0	0	0	1	4	0	0	0	13
AAGTCGTAGTTGAAGT-1_1	0	0	0	1	1	1	1	1	1	3	3	3	3	3	1	0	2	2	2	7	8	8	9	10	8	8	8	8	7	8	9
AAGTCGTCAACATACC-1_1	0	0	0	0	4	4	5	5	5	6	6	6	6	6	7	7	7	7	7	6	5	5	5	5	6	5	6	4	5	5	5
AAGTCGTCACATAGCT-1_1	0	0	0	0	0	0	0	0	0	0	0	0	0	0	0	3	0	4	0	3	1	0	1	0	1	0	0	0	0	1	4
AAGTCGTGTTACGTAC-1_1	0	0	2	3	3	3	3	3	3	2	2	2	2	5	4	5	5	5	4	5	3	3	2	2	2	2	1	6	2	2	1
AAGTCGTTCACTACGA-1_1	0	0	0	0	4	4	5	5	5	6	6	6	6	6	7	7	7	7	7	6	5	5	5	5	6	5	6	4	5	5	5
AAGTGAACAAATAAGC-1_1	0	1	1	1	1	1	1	1	1	4	4	4	4	2	5	6	4	6	5	4	6	4	4	4	4	3	3	3	8	9	3
AAGTGAACACCCTATC-1_1	0	3	4	5	6	6	7	9	9	9	9	8	8	8	10	9	11	9	15	16	16	17	17	17	17	17	17	17	18	18	19
AAGTGAACATTGTGCA-1_1	0	0	0	0	0	0	0	0	0	0	0	0	0	0	6	2	6	1	6	1	4	6	6	7	3	6	5	5	3	3	6
AAGTGAAGTGAGACCA-1_1	0	0	0	0	4	4	5	5	5	6	6	6	6	6	7	7	7	7	7	6	5	5	5	5	6	5	6	4	5	5	5
AAGTGAAGTGATTAGA-1_1	0	0	0	2	2	2	2	2	2	1	1	1	1	1	2	1	1	0	1	0	0	2	3	3	5	4	2	2	4	4	2
AAGTGAATCTCTGGTC-1_1	0	0	0	2	2	2	2	2	2	1	1	1	1	1	9	1	10	0	10	7	12	11	11	12	11	11	10	12	11	10	11
AAGTTCGAGCTACGTT-1_1	0	0	2	3	3	3	3	3	3	2	2	2	2	10	12	12	14	11	13	14	14	15	15	14	15	16	15	9	16	16	17
AAGTTCGAGGGATCAC-1_1	0	0	0	0	0	0	0	0	0	0	0	0	0	0	0	3	0	4	0	3	1	0	1	0	1	0	0	0	0	1	4
AAGTTCGAGTTCCGGC-1_1	0	0	0	2	2	2	2	6	7	8	8	7	7	7	8	8	8	8	8	10	10	10	8	8	9	10	9	10	10	6	10
AAGTTCGCAACGATTC-1_1	0	2	3	4	5	5	6	7	6	7	7	9	9	9	11	10	12	10	12	12	13	14	14	15	13	14	13	15	15	14	15
AATAGAGAGTTGGAAT-1_1	0	1	1	1	1	1	1	1	1	4	4	4	4	2	5	6	4	6	5	4	6	4	4	4	4	3	3	3	8	9	3
AATAGAGCAGGTACGA-1_1	0	0	0	2	2	2	2	2	2	1	1	1	1	1	2	1	1	0	1	0	0	2	3	3	5	4	2	2	4	4	2
AATAGAGCATTCCTCG-1_1	0	0	2	3	3	3	3	3	3	2	2	2	2	5	4	5	5	5	4	5	3	3	2	2	2	2	1	6	2	2	1
AATAGAGTCACCGCTT-1_1	0	0	0	0	0	0	0	0	0	0	0	0	0	0	6	2	6	1	6	1	4	6	6	11	3	6	5	5	3	3	6
AATAGAGTCATCTCTA-1_1	0	2	3	4	5	5	6	7	6	7	7	9	9	9	11	10	12	10	12	12	13	14	14	15	13	14	13	15	15	14	15
AATAGAGTCTGTACAG-1_1	0	1	1	1	1	1	1	1	1	4	4	4	4	2	5	6	4	6	5	4	6	4	4	4	4	3	3	3	8	9	3
AATAGAGTCTTAGCAG-1_1	0	2	3	4	5	5	6	7	6	7	7	9	9	9	11	10	12	10	12	12	13	14	14	15	13	14	13	15	15	14	15
AATCACGAGATAGCTA-1_1	0	0	2	3	3	3	3	3	3	2	2	2	2	5	4	5	5	5	4	5	3	3	2	2	2	2	1	6	2	2	1
AATCACGCAAAGGGTC-1_1	0	0	0	2	2	2	2	2	2	1	1	1	1	12	9	13	10	13	10	11	12	11	11	12	11	11	10	12	11	10	11
AATCACGCAGCTATTG-1_1	0	0	0	2	2	2	2	2	2	1	1	1	1	12	9	13	10	13	10	11	12	11	11	12	11	11	10	12	11	10	11
AATCGACCAAAGGCAC-1_1	0	1	1	1	1	1	1	1	1	4	4	4	4	2	5	6	4	6	5	4	6	4	4	4	4	3	3	3	8	9	3
AATCGACCAATACCTG-1_1	0	0	0	0	0	0	0	0	0	0	0	0	0	0	6	2	6	1	6	1	4	6	6	7	3	6	5	5	3	3	6
AATCGACTCGTTCCTG-1_1	0	0	0	0	4	4	5	5	5	6	6	6	6	6	7	7	7	7	7	6	5	5	5	5	6	5	6	4	5	5	5
AATCGTGCAGGTTCCG-1_1	0	0	0	0	0	0	0	0	0	0	0	0	0	0	0	3	0	4	0	3	1	0	10	0	1	0	0	0	0	1	13
AATCGTGGTCTATGAC-1_1	0	1	1	1	1	1	1	1	1	4	4	4	4	2	1	0	4	6	5	4	9	4	4	4	4	3	3	3	12	11	3
AATGAAGAGTAGGGTC-1_1	0	1	1	1	1	1	1	1	1	3	3	3	3	3	1	0	2	2	2	8	7	7	7	6	7	7	7	7	6	7	8
AATGAAGAGTTGTAAG-1_1	0	0	0	0	0	0	0	4	4	5	5	0	5	4	0	4	0	3	3	2	1	1	0	1	0	0	0	1	1	0	0
AATGAAGGTGACAGGT-1_1	0	0	0	1	1	1	1	1	1	3	3	3	3	3	1	0	2	2	2	7	8	8	9	10	8	8	8	8	7	8	9
AATGACCCAGCCGTCA-1_1	0	2	3	4	5	5	6	7	6	7	7	9	9	9	11	10	12	10	12	12	13	14	14	15	13	14	13	15	15	14	15
AATGACCCAGCTGTTA-1_1	0	0	0	0	4	4	5	5	5	6	6	6	6	6	7	7	7	7	7	6	5	5	5	5	6	5	6	4	5	5	5
AATGCCAAGATCCAAA-1_1	0	0	0	0	0	0	4	4	4	5	5	5	5	4	3	4	3	3	3	2	2	1	0	1	0	1	4	1	1	0	0
AATGCCAGTCGCAGTC-1_1	0	0	0	0	4	4	5	5	5	6	6	6	6	6	7	7	7	7	7	6	5	5	5	5	6	5	6	4	5	5	5
AATGCCATCAGTGATC-1_1	0	0	0	2	2	2	2	2	2	1	1	1	1	1	2	1	1	0	1	0	0	2	3	3	5	4	2	2	4	4	2
AATGGAAAGAATTCAG-1_1	0	0	0	2	2	2	2	2	2	1	1	1	1	1	2	1	1	0	1	0	0	2	3	3	5	4	2	2	4	4	2
AATGGAACAACGACTT-1_1	0	1	1	1	1	1	1	1	1	3	3	3	3	3	1	0	2	2	2	8	7	7	7	6	7	7	7	7	6	7	8
AATGGCTTCACTGGGC-1_1	0	0	0	2	2	2	2	2	2	1	1	1	1	1	2	1	1	0	1	0	0	2	3	3	5	4	2	2	4	4	2
AATTCCTAGGTACCTT-1_1	0	0	0	2	2	2	2	2	2	1	1	1	1	1	2	1	1	0	1	0	0	2	3	3	5	4	2	2	4	4	2
AATTCCTAGGTGCTTT-1_1	0	0	0	2	2	2	2	2	2	1	1	1	1	1	2	1	1	0	1	0	0	2	3	3	5	4	2	2	4	4	2
AATTCCTCATGTTCAG-1_1	0	1	1	1	1	1	1	1	1	3	3	3	3	3	1	0	2	2	2	8	7	7	7	6	7	7	7	7	6	7	8
AATTCCTTCAGCGGAA-1_1	0	0	0	0	4	4	5	5	5	6	6	6	6	6	7	7	7	7	7	6	5	5	5	5	6	5	6	4	5	5	5
AATTTCCCAGATCATC-1_1	0	0	0	0	0	0	0	5	5	6	0	6	6	6	0	7	0	7	0	6	5	5	5	5	6	5	6	0	5	5	5
AATTTCCTCCTTACCG-1_1	0	1	1	1	1	1	1	8	8	4	4	4	4	2	5	6	4	6	11	4	6	12	12	13	4	13	12	13	14	12	3
ACAACCACATGTTCAG-1_1	0	0	0	2	2	2	2	2	2	1	1	1	1	1	2	1	1	0	1	0	0	2	3	3	5	4	2	2	4	4	2
ACAACCAGTATCGTAC-1_1	0	0	0	2	2	2	2	2	2	1	1	1	1	1	2	1	1	0	1	0	0	2	3	3	5	4	2	2	4	4	2
ACAAGCTAGCAATAGT-1_1	0	0	0	0	2	2	0	6	0	8	0	0	7	7	8	8	9	8	9	9	11	9	8	8	10	9	9	11	9	6	7
ACAAGCTTCTTTGCTA-1_1	0	0	0	2	2	2	2	2	2	1	1	1	1	1	9	1	10	0	10	11	12	11	11	12	11	11	10	12	11	10	11
ACACAGTAGAACGTGC-1_1	0	0	0	0	0	0	4	4	4	5	5	5	5	4	3	4	3	3	3	2	2	1	0	1	0	1	4	1	1	0	0
ACACCAAAGACTGTTC-1_1	0	0	0	2	2	2	2	2	2	1	1	1	1	1	2	1	1	0	1	0	0	2	3	3	5	4	2	2	4	4	2
ACACCAAAGAGCATTA-1_1	0	0	0	0	4	4	5	5	5	6	6	6	6	6	7	7	7	7	7	6	5	5	5	5	6	5	6	4	5	5	5
ACACCAAGTCGTCAGC-1_1	0	1	1	1	1	1	1	1	1	4	4	4	4	2	5	6	4	6	5	4	6	4	4	4	4	3	3	3	8	9	3
ACACCAAGTTACAGCT-1_1	0	1	1	1	1	1	1	8	8	4	4	4	4	2	5	6	4	6	11	4	6	12	12	13	4	13	12	13	14	12	3
ACACGCGCAATAACGA-1_1	0	1	1	1	1	1	1	1	1	3	3	3	3	3	1	0	2	2	2	8	7	7	7	6	7	7	7	7	6	7	8
ACACGCGCAGAGGCAT-1_1	0	0	2	3	3	3	3	3	3	2	2	2	2	5	4	5	5	5	4	5	3	3	2	2	2	2	1	6	2	2	1
ACACGCGTCACCGGGT-1_1	0	1	1	1	1	1	1	8	8	4	4	4	4	2	5	6	4	6	11	4	6	4	4	13	4	3	3	13	8	9	3
ACACTGACAGAGGAAA-1_1	0	1	1	1	1	1	1	1	1	3	3	3	3	3	1	0	2	11	2	8	7	7	7	6	7	7	7	7	6	7	8
ACACTGACATCGCTCT-1_1	0	0	0	0	0	0	0	4	4	5	5	0	5	4	0	4	0	3	3	2	1	1	0	1	0	0	0	1	1	0	0
ACACTGAGTCGATGCC-1_1	0	0	0	0	0	0	0	0	0	0	0	0	0	0	8	2	9	1	9	9	11	9	8	9	10	9	9	11	9	6	7
ACACTGATCCGTGTCT-1_1	0	0	0	0	0	0	0	0	0	0	0	0	0	0	6	2	6	1	6	1	4	6	6	11	3	6	5	5	3	3	6
ACACTGATCGAATCCA-1_1	0	0	0	1	0	1	1	1	1	3	3	3	3	3	1	0	2	2	2	7	8	8	9	10	8	8	8	8	7	8	9
ACAGAAACAGAATTCC-1_1	0	0	0	0	0	0	0	0	0	0	0	0	0	0	0	3	0	4	0	3	1	0	10	0	1	0	0	0	0	1	13
ACAGAAACATGATCTG-1_1	0	2	3	4	5	5	6	7	6	7	7	9	9	9	11	10	12	10	12	12	13	14	14	15	13	14	13	15	15	14	15
ACAGAAATCTCACCCA-1_1	0	0	0	0	0	0	0	0	0	0	0	0	0	0	0	3	0	4	0	3	1	0	1	0	1	0	0	0	0	1	4
ACAGCCGCAGAATGTA-1_1	0	0	0	2	2	2	2	2	2	1	1	1	1	12	9	13	10	13	10	11	12	11	11	12	11	11	10	12	11	10	11
ACAGCCGCAGTCAGCC-1_1	0	1	1	1	1	1	1	8	8	4	4	4	4	2	5	6	13	12	11	13	6	12	12	13	14	13	12	13	14	12	16
ACAGCCGGTTATCCAG-1_1	0	0	0	0	0	0	4	4	4	5	5	5	5	4	3	4	3	3	3	2	2	1	0	1	0	1	4	1	1	0	0
ACAGCCGTCTGCGATA-1_1	0	1	1	1	1	1	1	1	1	3	3	3	3	2	5	0	4	6	5	4	7	4	7	6	7	3	7	3	8	9	3
ACAGGGAGTCAGGTGA-1_1	0	0	0	1	1	1	1	1	1	3	3	3	3	3	1	0	2	2	2	7	8	8	9	10	8	8	8	8	7	8	9
ACAGGGATCGAGAAAT-1_1	0	0	0	0	0	0	0	0	0	0	0	0	0	0	0	3	0	4	0	3	1	0	10	0	1	0	0	0	0	1	13
ACAGGGATCTATACTC-1_1	0	1	1	1	1	1	1	1	1	3	3	3	3	3	1	0	2	2	2	8	7	7	7	6	7	7	7	7	6	7	8
ACATCCCCACAACGTT-1_1	0	0	0	2	2	2	2	2	2	1	1	1	1	1	2	1	1	0	1	0	0	2	3	3	5	4	2	2	4	4	2
ACATCCCCATGTGCTA-1_1	0	0	0	0	4	4	5	5	5	6	6	6	6	6	7	7	7	7	7	6	5	5	5	5	6	5	6	4	5	5	5
ACATCGAGTTGTCTAG-1_1	0	1	1	1	1	1	1	1	1	3	3	3	3	3	1	0	4	6	5	8	7	7	7	6	7	7	7	7	6	7	8
ACATCGATCGACATCA-1_1	0	1	1	1	1	1	1	8	8	4	4	4	4	2	5	6	13	12	11	13	6	12	12	13	14	13	12	13	14	12	16
ACATGCAAGAGCTTTC-1_1	0	0	0	0	0	0	0	0	0	0	0	0	0	0	0	3	0	4	0	3	1	0	10	0	1	0	0	0	0	1	13
ACATGCACATTGAGGG-1_1	0	1	1	1	1	1	1	1	1	4	4	4	4	2	5	6	4	6	5	4	6	4	4	4	4	3	3	3	8	9	3
ACATTTCGTCCAGCGT-1_1	0	0	0	0	0	0	0	0	0	0	0	0	0	0	0	3	0	4	0	3	1	0	1	0	1	0	0	0	0	1	4
ACATTTCGTTCTTGTT-1_1	0	2	3	4	5	5	6	7	6	7	7	9	9	9	11	10	12	10	12	12	13	14	14	15	13	14	13	15	15	14	15
ACATTTCGTTGTCATG-1_1	0	1	3	1	1	1	6	1	1	7	7	10	10	11	13	11	15	14	14	15	15	16	16	16	16	15	14	16	17	15	18
ACATTTCTCAAAGAAC-1_1	0	0	0	0	0	0	4	4	4	5	5	5	5	4	3	4	3	3	3	2	2	1	0	1	0	1	4	1	1	0	0
ACATTTCTCGACCCAG-1_1	0	4	5	6	9	9	10	12	12	12	12	13	13	15	16	16	18	17	19	20	20	21	21	21	21	21	21	21	22	22	23
ACCAAACAGTCATCGT-1_1	0	1	1	1	1	1	1	1	1	3	3	3	3	3	1	0	2	2	2	8	7	7	7	6	7	7	7	7	6	7	8
ACCAAACTCTTTGGAG-1_1	0	0	0	0	0	0	0	0	0	0	0	0	0	0	0	2	0	1	0	1	4	0	1	9	3	9	5	0	3	3	7
ACCAACAAGAGCTTTC-1_1	0	0	2	3	3	3	3	3	3	2	2	2	2	5	4	5	5	5	4	5	3	3	2	2	2	2	1	9	2	2	1
ACCAACAGTAGCACGA-1_1	0	0	0	2	2	2	2	2	2	1	1	1	1	1	2	1	1	0	1	0	0	2	3	3	5	4	2	2	4	4	2
ACCAACAGTCCCAAAT-1_1	0	0	0	0	0	0	0	0	0	0	0	0	0	6	7	7	7	7	7	6	5	5	5	5	6	5	6	4	5	5	5
ACCAACATCCTGATAG-1_1	0	4	5	6	7	7	8	10	10	10	10	11	11	13	14	14	16	15	16	17	17	18	18	18	18	18	18	18	19	19	20
ACCACAAAGCCTATCA-1_1	0	0	0	2	2	2	2	2	2	1	1	1	1	1	2	1	1	0	1	0	0	13	13	11	12	12	11	14	13	13	12
ACCACAACAACCGTAT-1_1	0	1	1	1	1	1	1	8	8	4	4	4	4	2	5	6	13	12	11	13	6	12	12	13	14	13	12	13	8	9	16
ACCACAATCTCTCTAA-1_1	0	0	0	1	1	1	1	1	1	3	3	3	3	3	1	0	2	2	2	7	8	8	9	10	8	8	8	8	7	8	9
ACCATTTCATCATTGG-1_1	0	0	0	0	0	0	0	0	0	0	0	0	0	0	0	3	0	4	0	3	1	0	1	0	1	0	0	0	0	1	4
ACCATTTTCACGAGGA-1_1	0	0	0	0	4	4	5	5	5	6	6	6	6	6	7	7	7	7	7	6	5	5	5	5	6	5	6	4	5	5	5
ACCATTTTCCAGTACA-1_1	0	0	0	2	2	2	2	6	7	8	8	7	7	7	8	8	8	8	8	10	10	10	8	8	9	10	9	10	10	6	10
ACCCAAACAAGCACAG-1_1	0	0	2	3	3	3	3	3	3	2	2	2	2	5	4	5	5	5	4	5	3	3	2	2	2	2	1	6	2	2	1
ACCCAAACATATCTCT-1_1	0	2	3	4	5	5	6	7	6	7	7	10	10	11	13	11	15	14	14	15	15	16	16	16	16	15	14	16	17	15	18
ACCCAAATCATGTCTT-1_1	0	3	4	5	6	6	7	9	9	9	9	8	8	8	10	9	11	9	15	16	16	17	17	17	17	17	17	17	18	18	19
ACCCTCAAGCGTTCCG-1_1	0	0	0	0	0	0	4	4	4	5	5	5	5	4	3	4	3	3	3	2	2	1	4	1	0	1	3	1	1	0	14
ACCCTCAAGGTCGTGA-1_1	0	2	3	4	5	5	6	7	6	7	7	9	9	9	11	10	12	10	12	12	13	14	14	15	13	14	13	15	15	14	15
ACCCTCACAATGTTGC-1_1	0	0	2	3	3	3	3	3	3	2	2	2	2	5	4	5	5	5	4	5	3	3	2	2	2	2	1	6	2	2	1
ACCCTCACAGTTCCAA-1_1	0	0	0	2	2	2	2	6	7	8	8	7	7	7	8	8	8	8	8	10	10	10	8	8	9	10	9	10	10	6	10
ACCCTCATCTCTCCGA-1_1	0	0	0	0	0	0	0	0	0	0	0	0	0	0	9	2	10	13	10	11	12	11	11	12	11	11	10	12	11	10	11
ACCCTTGCACTTGTGA-1_1	0	3	4	5	6	6	7	9	9	9	9	8	8	8	10	9	11	9	17	18	18	19	19	19	19	19	19	19	20	20	21
ACCGTTCAGAGCGACT-1_1	0	1	1	1	1	1	1	8	8	4	4	4	4	2	5	6	4	6	11	4	6	4	4	13	4	13	12	13	8	9	3
ACCGTTCTCGAGCTGC-1_1	0	1	1	1	1	1	1	8	8	4	4	4	4	2	5	6	13	12	11	13	6	12	12	13	14	13	12	13	14	12	16
ACCGTTCTCTCCTACG-1_1	0	0	0	0	0	0	0	0	0	0	0	0	0	0	0	2	0	1	0	1	1	0	1	9	3	0	0	0	0	3	4
ACCTACCAGACAGCGT-1_1	0	0	0	2	2	2	2	6	7	8	8	7	7	7	8	8	8	8	8	10	10	10	8	8	9	10	9	10	10	6	10
ACCTACCAGGTAACTA-1_1	0	5	6	7	8	8	9	11	11	11	11	12	12	14	15	15	17	16	18	19	19	20	20	20	20	20	20	20	21	21	22
ACCTACCCACTCCCTA-1_1	0	0	0	0	0	0	4	4	4	5	5	5	5	4	3	4	3	3	3	2	2	1	0	1	0	1	4	1	1	0	0
ACCTACCTCAGTCTTT-1_1	0	0	0	0	0	0	4	4	4	5	5	5	5	4	3	4	3	3	3	2	2	1	0	1	0	1	4	1	1	0	0
ACCTACCTCCGGTTCT-1_1	0	1	1	1	1	1	1	1	1	4	4	4	4	2	5	6	4	6	5	4	6	4	4	4	4	3	3	3	8	9	3
ACCTGAAAGAGAAGGT-1_1	0	4	5	6	7	7	8	10	10	10	10	11	11	13	14	14	16	15	16	17	17	18	18	18	18	18	18	18	19	19	20
ACCTGAAGTTGTCATG-1_1	0	4	5	6	9	9	10	12	12	12	12	13	13	15	16	16	18	17	19	20	20	21	21	21	21	21	21	21	22	22	23
ACCTGTCAGAGCCGTA-1_1	0	0	0	2	2	2	2	6	7	8	8	7	7	7	8	8	8	8	8	10	10	10	8	8	9	10	9	10	10	6	10
ACCTGTCGTGAGATCG-1_1	0	0	0	0	0	0	4	4	4	5	5	5	5	4	3	4	3	3	3	2	2	1	0	1	0	1	4	1	1	0	0
ACCTGTCGTGCGGATA-1_1	0	0	2	3	3	3	3	3	3	2	2	2	2	5	4	5	5	5	4	5	3	3	2	2	2	2	1	6	2	2	1
ACGATCAAGGCGCTCT-1_1	1	6	7	8	10	10	11	13	13	13	13	14	14	16	17	17	19	18	20	21	21	22	22	22	22	22	22	22	23	23	24
ACGATCAAGGTATTGA-1_1	0	3	4	5	6	6	7	9	9	9	9	8	8	8	10	9	11	9	15	16	16	17	17	17	17	17	17	17	18	18	19
ACGATCAAGTGCACTT-1_1	0	1	1	1	1	1	1	1	1	3	3	3	3	3	1	0	2	2	2	8	7	7	7	6	7	7	7	7	6	7	8
ACGATCATCGTAGGAG-1_1	0	0	0	2	2	2	2	2	2	1	1	1	1	1	2	1	1	0	1	0	0	2	3	3	5	4	2	2	4	4	2
ACGATGTAGCACCTGC-1_1	0	0	0	1	1	1	1	1	1	3	3	3	3	3	1	0	2	2	2	7	8	8	9	10	8	8	8	8	7	8	9
ACGATGTTCCCGTTCA-1_1	0	0	0	0	0	0	0	0	0	0	0	0	0	0	6	2	6	1	6	1	4	6	6	7	3	6	5	5	3	3	6
ACGCACGAGACTTCCA-1_1	0	0	2	3	3	3	3	3	3	2	2	2	2	5	4	5	5	5	4	5	3	3	2	2	2	2	1	6	2	2	1
ACGCACGAGCTAAATG-1_1	0	0	0	0	0	0	4	4	4	5	5	5	5	4	3	4	3	3	3	2	2	1	4	1	0	1	3	1	1	0	14
ACGCACGTCTCACTCG-1_1	0	1	1	1	1	1	1	1	1	3	3	3	3	3	1	0	2	11	2	8	7	7	7	6	7	7	7	7	6	7	8
ACGGAAGAGGTACATA-1_1	0	0	0	0	0	0	0	0	0	0	0	0	0	0	6	2	6	1	6	1	4	6	6	11	3	6	5	5	3	3	6
ACGGAAGAGTTAGAAC-1_1	0	1	1	1	1	1	1	1	1	4	4	4	4	2	5	6	4	6	5	4	9	4	4	4	4	3	3	3	8	9	3
ACGGAAGCACATTACG-1_1	0	2	3	4	5	5	6	7	6	7	7	10	10	11	13	11	15	14	14	15	15	16	16	16	16	15	14	16	17	15	18
ACGGAAGCAGCTGTTA-1_1	0	0	0	0	4	4	5	5	5	6	6	6	6	6	7	7	7	7	7	6	5	5	5	5	6	5	6	4	5	5	5
ACGGGTCAGAATAGTC-1_1	0	2	3	4	5	5	6	7	6	7	7	9	9	9	11	10	12	10	12	12	13	14	14	15	13	14	13	15	15	14	15
ACGGGTCAGTCCGCGT-1_1	0	0	0	2	2	2	2	6	7	8	8	7	7	7	8	8	8	8	8	10	10	10	8	8	9	10	9	10	10	6	10
ACGGGTCCAAACTAAG-1_1	0	0	0	2	2	2	2	2	2	1	1	1	1	1	2	1	1	0	1	0	0	2	3	3	5	4	2	2	4	4	2
ACGGGTCCAATCTCTT-1_1	0	3	4	5	6	6	7	9	9	9	9	8	8	8	10	9	11	9	17	18	18	19	19	19	19	19	19	19	20	20	21
ACGGGTCTCCTAGCTC-1_1	0	0	0	2	2	2	2	2	2	1	1	1	1	1	2	1	1	0	1	0	0	2	3	3	5	4	2	2	4	4	2
ACGGGTCTCTCCGAAA-1_1	0	0	0	1	1	1	1	1	1	3	3	3	3	3	1	0	2	2	2	7	8	8	9	10	8	8	8	8	7	8	9
ACGGTCGAGGCCCACT-1_1	0	1	1	1	1	1	1	1	1	4	4	4	4	2	5	6	4	6	5	4	6	4	4	4	4	3	3	3	8	9	3
ACGGTCGAGTCAGCCC-1_1	0	1	1	1	1	1	1	1	1	4	4	4	4	2	5	6	4	6	5	4	6	4	4	4	4	3	3	3	8	9	3
ACGGTCGGTCGTGATT-1_1	0	0	0	0	0	0	0	0	0	0	0	0	0	0	6	2	6	1	6	1	4	6	6	7	3	6	5	5	3	3	6
ACGGTTAAGAGGCGTT-1_1	0	0	0	0	2	2	2	6	7	8	8	7	7	7	8	8	8	8	8	9	10	9	8	8	9	10	9	10	9	6	10
ACGGTTAAGGACTTCT-1_1	0	5	6	7	8	8	9	11	11	11	11	12	12	14	15	15	17	16	18	19	19	20	20	20	20	20	20	20	21	21	22
ACGGTTAGTACTCGAT-1_1	0	0	0	2	2	2	2	6	7	8	8	7	7	7	8	8	8	8	8	10	10	10	8	8	9	10	9	10	10	6	10
ACGGTTATCACCATCC-1_1	0	0	0	0	4	4	5	5	5	6	6	6	6	6	7	7	7	7	7	6	5	5	5	5	6	5	6	4	5	5	5
ACGGTTATCATGAGTC-1_1	0	0	0	0	4	4	5	5	5	6	6	6	6	6	7	7	7	7	7	6	5	5	5	5	6	5	6	4	5	5	5
ACGGTTATCGCCGAAC-1_1	0	0	0	0	0	0	0	0	0	0	0	0	0	0	0	3	0	4	0	3	1	0	1	0	1	0	0	0	0	1	13
ACGTAACAGATGACCG-1_1	0	0	0	0	0	0	4	4	4	5	5	5	5	4	3	4	3	3	3	2	2	1	0	1	0	1	4	1	1	0	0
ACGTAACTCAATCCGA-1_1	0	1	1	1	1	1	1	1	1	4	4	4	4	2	5	6	4	6	5	4	6	4	4	4	4	3	3	3	8	9	3
ACGTAACTCAATCTCT-1_1	0	3	4	5	6	6	7	9	9	9	9	8	8	8	10	9	11	9	17	18	18	19	19	19	19	19	19	19	20	20	21
ACGTACAAGATAGTGT-1_1	0	0	0	2	2	2	2	2	2	1	1	1	1	1	2	1	1	0	1	0	0	2	3	3	5	4	2	2	4	4	2
ACGTACAGTTCATCGA-1_1	0	0	0	2	2	2	2	2	2	1	1	1	1	1	2	1	1	0	1	1	0	2	13	11	12	12	11	14	13	13	12
ACGTACATCAGTCATG-1_1	0	0	0	2	2	2	2	2	2	1	1	1	1	12	9	13	10	13	10	11	12	11	11	12	11	11	10	12	11	10	11
ACGTAGTAGAGCAAGA-1_1	0	0	0	2	2	2	2	6	7	8	8	7	7	7	8	8	8	8	8	10	10	10	8	8	9	10	9	10	10	6	10
ACGTAGTAGCACAAAT-1_1	0	0	0	0	4	4	5	5	5	6	6	6	6	6	7	7	7	7	7	6	5	5	5	5	6	5	6	4	5	5	5
ACGTAGTAGGTACTGG-1_1	0	1	1	1	1	1	1	1	1	4	4	4	4	2	1	0	4	6	5	4	9	4	4	4	4	3	3	3	12	11	14
ACGTAGTAGGTGATCG-1_1	0	1	1	1	1	1	1	1	1	3	3	3	3	3	1	0	2	2	2	8	7	7	7	6	7	7	7	7	6	7	8
ACGTAGTAGTGAGCCA-1_1	0	0	0	1	0	0	0	0	0	0	0	0	0	0	1	0	2	2	0	7	8	8	9	0	8	8	8	8	7	8	4
ACGTCCTGTAAGGCCA-1_1	0	0	0	2	2	2	2	2	2	1	1	1	1	1	9	1	10	0	10	7	12	11	11	12	11	11	10	12	11	10	11
ACGTCCTTCCTTCAGC-1_1	0	0	0	0	0	0	0	0	0	0	0	0	0	0	0	3	0	4	0	3	1	0	1	0	1	0	0	0	0	1	4
ACGTTCCAGTAACCTC-1_1	0	0	0	0	0	0	4	4	4	5	5	5	5	4	3	4	3	3	3	2	2	1	0	1	0	0	4	1	1	0	0
ACGTTCCAGTGAGCCA-1_1	0	0	0	0	4	4	5	5	5	6	6	6	6	6	7	7	7	7	7	6	5	5	5	5	6	5	6	4	5	5	5
ACGTTCCCAACAGTGG-1_1	0	0	0	0	0	0	0	0	0	0	0	0	0	0	6	2	6	1	6	1	4	6	6	7	3	6	5	5	3	3	6
ACGTTCCGTCTAGGCC-1_1	0	0	0	0	0	0	4	4	4	5	5	5	5	4	3	4	3	3	3	2	2	1	0	1	0	1	4	1	1	0	0
ACGTTCCGTGATACTC-1_1	0	0	0	1	1	0	0	0	0	0	0	0	0	0	1	0	2	2	0	3	1	0	1	0	8	0	8	0	12	8	4
ACGTTCCGTTGCTCAA-1_1	0	0	0	2	2	2	2	2	2	1	1	1	1	1	2	1	1	0	1	0	0	2	3	3	5	4	2	2	4	4	2
ACTACGAGTGTGTCCG-1_1	0	0	0	0	0	0	0	0	0	0	0	0	0	0	6	2	6	1	6	1	4	6	6	7	3	6	5	5	3	3	6
ACTACGATCACCCATC-1_1	0	1	1	1	1	1	1	1	1	4	4	4	4	2	5	6	4	6	5	4	6	4	4	4	4	3	3	3	8	9	3
ACTATCTCATGCAGCC-1_1	0	0	0	2	2	2	2	2	2	1	1	1	1	1	9	8	8	0	10	11	12	10	8	8	9	11	10	10	11	6	11
ACTATCTGTTCCTAGA-1_1	0	0	0	0	0	0	0	0	0	0	0	0	0	0	6	2	6	1	6	1	4	6	6	7	3	6	5	5	3	3	6
ACTATGGCACCCTAGG-1_1	0	0	0	0	0	0	0	0	0	0	0	0	0	0	6	2	6	1	6	1	4	6	6	7	3	6	5	5	3	3	6
ACTATGGGTCACTCTC-1_1	0	0	0	0	0	0	0	0	0	0	0	0	0	0	0	2	6	1	6	1	4	6	6	9	3	6	5	5	3	3	7
ACTATGGGTGCTAGCC-1_1	0	0	2	3	3	3	3	3	3	2	2	2	2	10	12	12	14	11	13	14	14	15	15	14	15	16	15	9	16	16	17
ACTATGGTCATCGCAA-1_1	0	0	2	3	3	3	3	3	3	2	2	2	2	10	12	12	14	11	13	14	14	15	15	14	15	16	15	9	16	16	17
ACTATTCAGCGAGTAC-1_1	0	0	0	0	0	0	0	0	0	0	0	0	0	0	6	2	6	1	6	1	4	6	6	7	3	6	5	5	3	3	6
ACTATTCTCTGACAGT-1_1	0	0	0	0	0	0	0	0	0	0	0	0	0	0	6	2	6	1	6	1	4	6	6	7	3	6	5	5	3	3	6
ACTCCCAAGCTGTACT-1_1	0	2	3	4	5	5	6	7	6	7	7	9	9	9	11	10	12	10	12	12	13	14	14	15	13	14	13	15	15	14	15
ACTCTCGCACCCATAA-1_1	0	0	0	2	2	2	2	6	7	8	8	7	7	7	8	8	8	8	8	10	10	10	8	8	9	10	9	10	10	6	10
ACTGATGCAAGCCATT-1_1	0	4	5	6	7	7	8	10	10	10	10	11	11	13	14	14	16	15	16	17	17	18	18	18	18	18	18	18	19	19	20
ACTGATGCATATCTGG-1_1	0	0	0	0	4	4	5	5	5	6	6	6	6	6	7	7	7	7	7	6	5	5	5	5	6	5	6	4	5	5	5
ACTGATGCATCAGCGC-1_1	0	0	0	2	2	2	2	2	2	1	1	1	1	1	2	1	1	0	1	0	0	2	3	3	5	4	2	2	4	4	2
ACTGCAAAGCCATTGT-1_1	0	0	0	0	0	0	0	0	0	0	0	0	0	0	0	2	0	1	6	1	4	6	6	9	3	6	5	5	3	3	7
ACTGCAAAGGCCTGCT-1_1	0	1	1	1	1	1	1	1	1	3	3	3	3	2	1	0	4	6	5	4	7	4	7	6	7	3	7	3	8	9	3
ACTGCAAAGTTGAAAC-1_1	0	0	0	0	0	0	0	0	0	0	0	0	0	0	0	3	0	4	0	3	1	0	10	0	1	0	0	0	0	1	13
ACTGCAACACGTGTGC-1_1	0	0	0	2	2	2	2	2	2	1	1	1	1	1	2	1	1	0	1	0	0	2	3	3	5	4	2	2	4	4	2
ACTGCAACATCTCAAG-1_1	0	0	0	1	1	1	1	1	1	3	3	3	3	3	1	0	2	2	2	7	8	8	9	10	8	8	8	8	7	8	9
ACTGCAATCCAGGACC-1_1	0	0	0	2	2	2	2	2	2	1	1	1	1	1	2	1	1	0	1	0	0	2	3	3	5	4	2	2	4	4	2
ACTGTCCAGAGGCGGA-1_1	0	0	0	0	0	0	0	0	0	0	0	0	0	0	6	2	6	1	6	1	4	6	6	7	3	6	5	5	3	3	6
ACTGTCCAGCACTCGC-1_1	0	4	5	6	7	7	8	10	10	10	10	11	11	13	14	14	16	15	16	17	17	18	18	18	18	18	18	18	19	19	20
ACTGTCCAGGATCACG-1_1	0	1	1	1	1	1	1	8	8	4	4	4	4	2	5	6	13	12	11	13	6	12	12	13	14	13	12	13	14	12	16
ACTGTCCAGGTTGGAC-1_1	0	0	2	3	3	3	3	3	3	2	2	2	2	10	12	12	14	11	13	14	14	15	15	14	15	16	15	9	16	16	17
ACTGTCCCAGCTATTG-1_1	0	0	0	0	4	4	5	5	5	6	6	6	6	6	7	7	7	7	7	6	5	5	5	5	6	5	6	4	5	5	5
ACTGTCCGTGACGCCT-1_1	0	0	0	0	0	0	4	4	4	5	5	5	5	4	3	4	3	3	3	2	2	1	0	1	0	1	4	1	1	0	0
ACTGTCCTCGGCTGTG-1_1	0	0	0	0	4	4	5	5	5	6	6	6	6	6	7	7	7	7	7	6	5	5	5	5	6	5	6	4	5	5	5
ACTGTGATCCAGCTCT-1_1	0	0	0	2	2	2	2	2	2	1	1	1	1	1	2	1	1	0	1	0	0	2	3	3	5	4	2	2	4	4	2
ACTGTGATCCGACGGT-1_1	0	0	0	0	0	0	0	0	0	0	0	0	0	0	0	3	0	4	0	3	1	0	10	0	1	0	0	0	0	1	13
ACTGTGATCGACATAC-1_1	0	0	2	3	3	3	3	3	3	2	2	2	2	10	12	12	14	11	13	14	14	15	15	14	15	16	15	9	16	16	17
ACTGTGATCGCAAGAG-1_1	0	2	3	4	5	5	6	7	6	7	7	10	10	11	13	11	15	14	14	15	15	16	16	16	16	15	14	16	17	15	18
ACTGTGATCTATCGCC-1_1	0	0	0	0	0	0	0	0	0	0	0	1	0	0	6	2	6	1	6	1	4	6	6	11	3	6	5	5	3	3	6
ACTTAGGAGAGTCCGA-1_1	0	0	0	0	4	4	5	5	5	6	6	6	6	6	7	7	7	7	7	6	5	5	5	5	6	5	6	4	5	5	5
ACTTAGGTCAAGAGGC-1_1	0	0	0	2	2	2	2	2	2	1	1	1	1	1	2	1	1	0	1	0	0	2	3	3	5	4	2	2	4	4	2
ACTTATCAGCGTGAGT-1_1	0	1	1	1	1	1	1	1	1	4	4	4	4	2	5	6	4	6	5	4	6	4	4	4	4	3	3	3	8	9	3
ACTTATCAGGGACACT-1_1	0	0	2	3	3	3	3	3	3	2	2	2	2	5	4	5	5	5	4	5	3	3	2	2	2	2	1	6	2	2	1
ACTTATCGTAGTCACT-1_1	0	0	0	0	0	0	4	4	4	5	5	5	5	4	3	4	3	3	3	2	2	1	0	1	0	1	4	1	1	0	0
ACTTATCGTTTCCCAC-1_1	0	1	3	1	1	1	6	1	1	7	7	10	10	11	13	11	15	14	14	15	15	16	16	16	16	15	14	16	17	15	18
ACTTCGCAGCAAATCA-1_1	0	1	1	1	1	1	1	8	8	4	4	4	4	2	5	6	13	12	11	13	6	12	12	13	14	13	12	13	14	12	16
ACTTCGCAGTCCTGCG-1_1	0	0	0	2	2	2	2	2	2	1	1	1	1	1	2	5	1	0	1	0	0	13	13	11	12	12	11	14	13	13	12
ACTTCGCCAAACCATC-1_1	0	0	0	0	0	0	4	4	4	5	5	5	5	4	3	4	3	3	3	2	2	1	0	1	0	1	4	1	1	0	0
ACTTCGCGTACAAGCG-1_1	0	0	0	2	2	2	2	2	2	1	1	1	1	1	2	1	1	0	1	0	0	2	3	3	5	4	2	2	4	4	2
ACTTCGCTCTGTCCGT-1_1	0	1	1	1	1	1	1	1	1	3	3	3	3	3	1	0	2	2	2	8	7	7	7	6	7	7	7	7	6	7	8
ACTTTCAAGTTACGTC-1_1	0	0	0	1	1	1	1	1	1	3	3	3	3	3	1	0	2	2	2	7	8	8	9	10	8	8	8	8	7	8	9
ACTTTCACAGGGTCTC-1_1	0	4	5	6	7	7	8	10	10	10	10	11	11	13	14	14	16	15	16	17	17	18	18	18	18	18	18	18	19	19	20
ACTTTCAGTCAGGCAA-1_1	0	0	0	0	4	4	5	5	5	6	6	6	6	6	7	7	7	7	7	6	5	5	5	5	6	5	6	4	5	5	5
ACTTTGTAGGGCTGAT-1_1	0	0	0	0	0	0	0	0	0	0	0	0	0	0	6	2	6	1	6	1	4	6	6	7	3	6	5	5	3	3	6
ACTTTGTAGTGCCAGA-1_1	0	0	0	2	2	2	2	2	2	1	1	1	1	1	2	1	1	0	1	0	0	2	3	3	5	4	2	2	4	4	2
ACTTTGTGTTGGCCTG-1_1	0	0	0	0	2	2	0	6	0	8	0	0	7	7	8	8	9	8	9	9	11	9	8	8	10	9	9	11	9	6	7
ACTTTGTTCGGTCAGC-1_1	0	0	0	0	0	0	0	5	5	6	0	6	0	6	0	7	0	7	0	6	5	5	5	5	6	5	6	0	5	5	5
AGAAATGCACTCTGCT-1_1	0	0	0	0	2	2	0	6	0	8	0	0	7	7	8	8	9	8	9	9	11	9	8	8	10	9	9	11	9	6	7
AGAAATGTCGAGTACT-1_1	0	0	0	0	0	0	0	0	0	6	0	6	0	0	7	2	7	1	7	1	4	5	5	5	3	5	5	4	3	3	5
AGAACAAAGTAGCTCT-1_1	0	0	2	3	3	3	3	3	3	2	2	2	2	5	4	5	5	5	4	5	3	3	2	2	2	2	1	6	2	2	1
AGAACAACACAACGAG-1_1	0	0	0	0	0	0	4	4	4	5	5	5	5	4	3	4	3	3	3	2	2	1	0	1	0	1	4	1	1	0	0
AGAACAACACAAGCAG-1_1	0	1	1	1	1	1	1	8	8	4	4	4	4	2	5	6	13	12	11	13	6	12	12	13	14	13	12	13	14	12	16
AGAACCTAGGTAAGTT-1_1	0	0	0	2	2	2	2	2	2	1	1	1	1	1	2	1	1	0	1	0	0	2	3	3	5	4	2	2	4	4	2
AGAACCTAGTTCTCTT-1_1	0	1	1	1	1	1	1	1	1	4	4	4	4	2	1	0	4	6	5	4	9	4	4	4	4	3	3	3	12	11	3
AGAACCTCAAGACGGT-1_1	0	0	0	0	0	0	0	0	0	0	0	0	0	0	0	3	0	4	0	3	1	0	1	0	1	0	0	0	0	1	4
AGAAGCGAGGATTCAA-1_1	0	0	2	3	3	3	3	3	3	2	2	2	2	5	4	5	5	5	4	5	3	3	2	2	2	2	1	6	2	2	1
AGAAGCGTCCGGCAGT-1_1	0	0	0	0	0	0	0	0	0	0	0	0	0	0	6	2	6	1	6	1	4	6	6	7	3	6	5	5	3	3	6
AGAAGCGTCGCATTGA-1_1	0	0	0	0	4	4	5	5	5	6	6	6	6	6	7	7	7	7	7	6	5	5	5	5	6	5	6	4	5	5	5
AGAAGCGTCTTTGCGC-1_1	0	0	0	0	0	0	4	4	4	5	5	5	5	4	3	4	3	3	3	2	2	1	0	1	0	1	4	1	1	0	0
AGAAGTATCACCACAA-1_1	0	0	0	2	2	2	2	2	2	1	1	1	1	1	2	1	1	0	1	0	0	2	3	3	5	4	2	2	4	4	2
AGAAGTATCCACACAA-1_1	0	0	0	0	0	0	0	0	4	6	0	0	0	0	0	3	0	4	0	3	1	0	0	0	1	0	0	0	0	1	13
AGACAAACACCTGTCT-1_1	0	0	0	0	4	4	5	5	5	6	6	6	6	6	7	7	7	7	7	6	5	5	5	5	6	5	6	4	5	5	5
AGACAAATCCTTGACC-1_1	0	0	2	3	3	3	3	3	3	2	2	2	2	5	4	5	5	5	4	5	3	3	2	2	2	2	1	6	2	2	1
AGACACTCAACGACAG-1_1	0	0	0	2	2	2	2	2	2	1	1	1	1	1	2	1	1	0	1	0	0	2	3	3	5	4	2	2	4	4	2
AGACAGGAGGCATCAG-1_1	0	0	0	0	0	0	0	0	0	0	0	0	0	0	0	3	0	4	0	3	1	0	10	0	1	0	0	0	0	1	13
AGACAGGCAATAACGA-1_1	0	1	1	1	1	1	1	1	1	3	3	3	3	2	1	0	2	2	2	4	7	7	7	6	7	7	7	7	6	7	8
AGACAGGCAATACGCT-1_1	0	0	0	2	4	4	5	5	7	6	6	7	7	6	8	8	7	7	8	10	10	5	8	5	6	5	6	4	10	5	10
AGACAGGCACAATCTG-1_1	0	0	0	0	0	0	0	0	4	5	5	0	5	0	0	3	0	4	0	2	1	0	0	0	1	0	0	0	0	1	0
AGACAGGTCATACGGT-1_1	0	0	0	0	4	4	5	5	5	6	6	6	6	6	7	7	7	7	7	6	5	5	5	5	6	5	6	4	5	5	5
AGACCATAGGCCATAG-1_1	0	0	0	2	2	2	2	6	7	8	8	7	7	7	8	8	8	8	8	10	10	10	8	8	9	10	9	10	10	6	10
AGACCATAGTAGGGTC-1_1	0	0	0	2	2	2	2	2	2	1	1	1	1	1	2	1	1	0	1	0	0	2	3	3	5	4	2	2	4	4	2
AGACCATAGTTGAAGT-1_1	0	0	0	1	1	1	1	1	1	3	3	3	3	3	1	0	2	2	2	7	8	8	9	10	8	8	8	8	7	8	9
AGACCATGTCACGCTG-1_1	0	0	0	0	0	0	0	0	0	0	0	1	0	0	6	2	6	1	6	1	4	6	6	11	3	6	5	5	3	3	6
AGACCCGAGTAGATCA-1_1	0	0	0	2	2	2	2	2	2	1	1	1	1	1	2	1	1	0	1	0	0	2	3	3	5	4	2	2	4	4	2
AGACTCAGTCTTGCTC-1_1	0	0	0	2	2	2	2	2	2	1	1	1	1	1	2	1	1	0	1	0	0	2	3	3	5	4	2	2	4	4	2
AGACTCAGTGAGTAAT-1_1	0	0	0	0	0	0	0	0	0	0	0	0	3	0	6	2	6	1	6	1	4	9	6	7	3	7	5	5	3	3	6
AGACTCATCGTCCTCA-1_1	0	0	0	0	4	4	5	5	5	6	6	6	6	6	7	7	7	7	7	6	5	5	5	5	6	5	6	4	5	5	5
AGAGAATCAGGCTTGC-1_1	0	0	2	3	3	3	3	3	3	2	2	2	2	5	4	5	5	5	4	5	3	3	2	2	2	2	1	6	2	2	1
AGAGAATCAGTGCGCT-1_1	0	0	0	2	2	2	2	2	2	1	1	1	1	12	9	13	10	13	10	11	12	11	11	12	11	11	10	12	11	10	11
AGAGAATCATGGTGGA-1_1	0	1	1	1	1	1	1	1	1	4	4	4	4	2	5	6	4	6	5	4	6	4	4	4	4	3	3	3	8	9	3
AGAGAATGTCACATTG-1_1	0	1	1	1	1	1	1	1	1	4	4	4	4	2	5	6	4	6	5	4	6	4	4	4	4	3	3	3	8	9	3
AGAGAATTCTGGACTA-1_1	0	0	0	0	0	0	0	0	0	0	0	0	0	0	6	2	6	1	6	1	4	6	6	7	3	6	5	5	3	3	6
AGAGCAGAGTACCATC-1_1	0	1	1	1	1	1	1	1	1	3	3	3	3	3	1	0	2	2	2	8	7	7	7	6	7	7	7	7	6	7	8
AGAGCAGAGTCAGCCC-1_1	0	0	0	0	0	0	4	4	4	5	5	5	5	4	3	4	3	3	3	2	2	1	0	1	0	1	4	1	1	0	0
AGAGCAGAGTTGCCTA-1_1	0	0	0	2	2	2	2	2	2	1	1	1	1	12	9	13	10	13	10	11	12	11	11	12	11	11	10	12	11	10	11
AGAGCAGCAACCGATT-1_1	0	0	0	0	0	0	4	4	4	5	5	5	5	4	3	4	3	3	3	2	2	1	0	1	0	1	4	1	1	0	0
AGAGCAGCAACTTGCA-1_1	0	0	2	3	3	3	3	3	3	2	2	2	2	5	4	5	5	5	4	5	3	3	2	2	2	2	1	6	2	2	1
AGAGCAGCAAGTTCGT-1_1	0	2	3	4	5	5	6	7	6	7	7	10	10	11	13	11	15	14	14	15	15	16	16	16	16	15	14	16	17	15	18
AGAGCAGCACCTGCGA-1_1	0	1	1	1	1	1	1	1	1	4	4	4	4	2	5	6	4	6	5	4	6	4	4	4	4	3	3	3	8	9	3
AGAGCCCCAGATCACT-1_1	0	1	1	1	1	1	1	8	8	4	4	4	4	2	5	6	4	6	11	4	6	12	12	13	4	13	12	13	14	12	3
AGATAGAAGATACCAA-1_1	0	2	3	4	5	5	6	7	6	7	7	9	9	9	11	10	12	10	12	12	13	14	14	15	13	14	13	15	15	14	15
AGATAGACAGCCGTCA-1_1	0	0	0	0	0	0	0	0	0	0	0	0	0	0	6	2	6	1	6	1	4	6	6	7	3	6	5	5	3	3	6
AGATAGACATCAGTCA-1_1	0	0	0	2	2	2	2	6	7	8	8	7	7	7	8	8	8	8	8	10	10	10	8	8	9	10	9	10	10	6	10
AGATAGAGTAGACGGT-1_1	0	0	0	2	2	2	2	2	2	1	1	1	1	12	9	13	10	13	10	11	12	11	11	12	11	11	10	12	11	10	11
AGATAGATCATCAGTG-1_1	0	0	0	0	0	0	4	4	4	5	5	5	5	4	3	4	3	3	3	2	2	1	0	1	0	1	4	1	1	0	0
AGATCCAAGACTGTTC-1_1	0	0	0	2	2	2	2	2	2	1	1	1	1	12	9	13	10	13	10	11	12	11	11	12	11	11	10	12	11	10	11
AGATCCAAGCACGTCC-1_1	0	3	4	5	6	6	7	9	9	9	9	8	8	8	10	9	11	9	17	18	18	19	19	19	19	19	19	19	20	20	21
AGATCCACACTGGATT-1_1	0	0	0	0	4	4	5	5	5	6	6	6	6	6	7	7	7	7	7	6	5	5	5	5	6	5	6	4	5	5	5
AGATCCATCATCTATC-1_1	0	0	0	0	0	0	0	0	0	0	0	0	0	0	0	3	0	4	0	3	1	0	1	0	1	0	0	0	0	1	4
AGATCCATCCCTAGGG-1_1	0	0	0	2	2	2	2	6	7	8	8	7	7	7	8	8	8	8	8	10	10	10	8	8	9	10	9	10	10	6	10
AGATCGTAGGTCCCGT-1_1	0	1	1	1	1	1	1	1	1	4	4	4	4	2	5	6	4	6	5	4	6	4	4	4	4	3	3	3	8	9	3
AGATCGTCACCCTGAG-1_1	0	0	0	0	4	4	5	5	5	6	6	6	6	6	7	7	7	7	7	6	5	5	5	5	6	5	6	4	5	5	5
AGATCGTCATTGCCTC-1_1	0	0	0	0	0	0	0	0	0	0	0	0	0	0	6	2	6	1	6	1	4	6	6	7	3	6	5	5	3	3	6
AGATGAAAGATGCTAA-1_1	0	0	2	3	3	3	3	3	3	2	2	2	2	5	4	5	5	5	4	5	3	3	2	2	2	2	1	6	2	2	1
AGATGAAGTATTGAGA-1_1	0	1	1	1	1	1	1	1	1	3	3	3	3	3	1	0	2	2	2	8	7	7	7	6	7	7	7	7	6	7	8
AGATGCTAGACCCGCT-1_1	0	2	3	4	5	5	6	7	6	7	7	9	9	9	11	10	12	10	12	12	13	14	14	15	13	14	13	15	15	14	15
AGATGCTAGCAATAAC-1_1	0	0	0	2	4	2	5	6	7	6	6	7	7	6	8	8	8	7	8	10	10	5	8	8	6	5	6	4	10	6	10
AGATGCTAGTCTACCA-1_1	0	0	0	0	4	4	5	5	5	6	6	6	6	6	7	7	7	7	7	6	5	5	5	5	6	5	6	4	5	5	5
AGATGCTCACAAAGTA-1_1	1	6	7	8	10	10	11	13	13	13	13	14	14	16	17	17	19	18	20	21	21	22	22	22	22	22	22	22	23	23	24
AGATGCTTCACTTTGT-1_1	0	0	0	0	0	0	4	4	4	5	5	5	5	4	3	3	3	3	3	2	2	0	0	1	0	1	4	1	0	0	0
AGCATCACAACTCGTA-1_1	0	0	0	0	0	0	0	0	0	0	0	1	0	0	6	2	6	1	6	1	4	6	6	11	3	6	5	5	3	3	6
AGCATCACATCGATCA-1_1	0	0	2	3	3	3	3	3	3	2	2	2	2	5	4	5	5	5	4	5	3	3	2	2	2	2	1	6	2	2	1
AGCATCATCTCCTACG-1_1	0	0	0	2	2	2	2	6	7	8	8	7	7	7	8	8	8	8	8	10	10	10	8	8	9	10	9	10	10	6	10
AGCCAATAGACCACGA-1_1	0	1	1	1	1	1	1	1	1	4	4	4	4	2	5	6	4	6	5	4	9	4	4	4	4	3	3	3	8	9	3
AGCCAATAGTCACACT-1_1	0	0	0	0	4	4	5	5	5	6	6	6	6	6	7	7	7	7	7	6	5	5	5	5	6	5	6	4	5	5	5
AGCCAATCAAGTATAG-1_1	0	2	3	4	5	5	6	7	6	7	7	9	9	9	11	10	12	10	12	12	13	14	14	15	13	14	13	15	15	14	15
AGCCAATCATCGCTGG-1_1	0	0	0	0	0	0	0	0	0	0	0	0	0	0	0	2	0	1	0	1	4	8	1	9	3	8	0	0	3	3	9
AGCCAATGTACGCTAT-1_1	0	4	5	6	9	9	10	12	12	12	12	13	13	15	16	16	18	17	19	20	20	21	21	21	21	21	21	21	22	22	23
AGCCAATGTTTCCAAG-1_1	1	6	7	8	10	10	11	13	13	13	13	14	14	16	17	17	19	18	20	21	21	22	22	22	22	22	22	22	23	23	24
AGCCAATTCGGACCAC-1_1	0	4	5	6	9	9	10	12	12	12	12	13	13	15	16	16	18	17	19	20	20	21	21	21	21	21	21	21	22	22	23
AGCCACGGTCAATGGG-1_1	0	0	0	0	2	2	0	6	0	8	0	0	7	7	8	8	9	8	9	9	11	9	8	8	10	9	9	11	9	6	7
AGCCACGTCGCAACAT-1_1	0	4	5	6	9	9	10	12	12	12	12	13	13	15	16	16	18	17	19	20	20	21	21	21	21	21	21	21	22	22	23
AGCCAGCAGCAAATCA-1_1	0	2	3	4	5	5	6	7	6	7	7	9	9	9	11	10	12	10	12	12	13	14	14	15	13	14	13	15	15	14	15
AGCCAGCCAATCGCGC-1_1	0	2	3	4	5	5	6	7	6	7	7	10	10	11	13	11	15	14	14	15	15	16	16	16	16	15	14	16	17	15	18
AGCGATTAGAGCGACT-1_1	0	1	1	1	1	1	1	1	1	4	4	4	4	2	5	6	4	6	5	4	6	4	4	4	4	3	3	3	8	9	3
AGCGATTAGGTCCCGT-1_1	0	2	3	4	5	5	6	7	6	7	7	9	9	9	11	10	12	10	12	12	13	14	14	15	13	14	13	15	15	14	15
AGCGATTCAAGTCCCG-1_1	0	0	0	1	1	1	1	1	1	3	3	3	3	3	1	0	2	2	2	7	8	8	9	10	8	8	8	8	7	8	9
AGCGATTGTACGTGAG-1_1	0	0	0	2	2	2	2	6	7	8	8	7	7	7	8	8	8	8	8	10	10	10	8	8	9	10	9	10	10	6	10
AGCGCCAAGTCGTCTA-1_1	0	0	0	0	4	4	5	5	5	6	6	6	6	6	7	7	7	7	7	6	5	5	5	5	6	5	6	4	5	5	5
AGCGCCACAAGATTGA-1_1	0	0	2	3	3	3	3	3	3	2	2	2	2	5	4	5	5	5	4	5	3	3	2	2	2	2	1	5	2	2	1
AGCGCCACAATCGCAT-1_1	0	0	2	3	3	3	3	3	3	2	2	2	2	5	6	2	6	5	6	1	4	6	6	7	2	6	5	5	2	3	6
AGCGCCACAGTGCGCT-1_1	0	0	2	3	3	3	3	3	3	2	2	2	2	5	4	5	5	5	4	5	3	3	2	2	2	2	1	6	2	2	1
AGCGCTGAGCAACTCT-1_1	0	0	0	2	2	2	2	2	2	1	1	1	1	12	9	13	10	13	10	11	12	11	11	12	11	11	10	12	11	10	11
AGCGCTGGTCCGGCAT-1_1	0	0	0	0	4	4	5	5	5	6	6	6	6	6	7	7	7	7	7	6	5	5	5	5	6	5	6	4	5	5	5
AGCGCTGGTGCCGTTG-1_1	0	0	2	3	3	3	3	3	3	2	2	2	2	5	4	5	5	5	4	5	3	3	2	2	2	2	1	6	2	2	1
AGCGCTGTCATCACCC-1_1	0	0	0	2	2	2	2	2	2	1	1	1	1	12	9	13	10	13	10	11	12	11	11	12	11	11	10	12	11	10	11
AGCGCTGTCGGCTGTG-1_1	0	0	2	3	3	3	3	3	3	2	2	2	2	5	4	5	5	5	4	5	3	3	2	2	2	2	1	9	2	2	1
AGCGTATAGCGTTACT-1_1	0	5	6	7	8	8	9	11	11	11	11	12	12	14	15	15	17	16	18	19	19	20	20	20	20	20	20	20	21	21	22
AGCGTATCACTGCTTC-1_1	0	0	2	3	3	3	3	3	3	2	2	2	2	5	4	5	5	5	4	5	3	3	2	2	2	2	1	9	2	2	1
AGCGTATGTCCATACA-1_1	0	1	1	1	1	1	1	1	1	4	4	4	4	2	5	6	4	6	5	4	6	4	4	4	4	3	3	3	8	9	3
AGCGTCGGTACGTAGG-1_1	0	0	2	3	3	3	3	3	3	2	2	2	2	5	4	5	5	5	4	5	3	3	2	2	2	2	1	9	2	2	1
AGCGTCGGTCCTTTGC-1_1	0	1	1	1	1	1	1	1	1	4	4	4	4	2	5	6	4	6	5	4	6	4	4	4	4	3	3	3	8	9	3
AGCTACACACCTTCCA-1_1	0	0	0	0	0	0	0	0	0	0	0	0	0	0	0	2	0	1	0	1	1	0	1	9	3	0	0	0	3	3	7
AGCTTCCAGAAGGCTC-1_1	0	1	2	3	1	1	1	3	3	3	3	2	3	10	12	12	14	11	13	14	7	15	15	14	15	16	15	7	16	16	17
AGGAAATAGTAGAATC-1_1	0	0	0	0	0	0	4	4	4	5	5	5	5	4	3	4	3	3	3	2	2	1	0	1	0	1	4	1	1	0	0
AGGAAATCACTCTCGT-1_1	0	0	0	0	0	0	0	0	4	5	5	0	5	0	0	3	0	4	0	2	1	0	0	0	1	0	0	0	0	1	0
AGGAAATGTAGTGCGA-1_1	0	0	0	0	0	0	0	0	0	0	0	0	0	0	0	3	9	4	0	3	1	9	10	0	1	9	0	11	0	1	7
AGGAATAAGCGAGTAC-1_1	0	0	0	0	0	0	0	0	0	0	0	0	0	0	0	3	0	4	0	3	1	0	10	0	1	0	0	0	0	1	13
AGGACGAAGCACTAAA-1_1	0	0	0	0	0	0	4	4	4	5	5	5	5	4	3	4	3	3	3	2	2	1	0	1	0	1	4	1	1	0	0
AGGACGAAGGAAAGTG-1_1	0	0	0	0	0	0	4	4	4	5	5	5	5	4	3	4	3	3	3	2	2	1	0	1	0	1	4	1	1	0	0
AGGACGACAAGCTACT-1_1	0	2	3	4	5	5	6	7	6	7	7	9	9	9	11	10	12	10	12	12	13	14	14	15	13	14	13	15	15	14	15
AGGACTTAGACATCCT-1_1	0	2	3	4	5	5	6	7	6	7	7	10	10	11	13	11	15	14	14	15	15	16	16	16	16	15	14	16	17	15	18
AGGACTTAGAGCTGCA-1_1	0	0	0	0	0	0	0	0	0	0	0	0	0	0	6	2	6	1	6	1	4	6	6	7	3	6	5	5	3	3	6
AGGACTTCACACGGAA-1_1	0	0	0	0	0	0	4	4	4	5	5	5	5	4	3	4	3	3	3	2	2	1	0	1	0	1	4	1	1	0	0
AGGAGGTAGAAGCTGC-1_1	0	0	0	2	2	2	2	2	2	1	1	1	1	1	2	1	1	0	1	0	0	2	3	3	5	4	2	2	4	4	2
AGGAGGTCAGGTAGTG-1_1	0	2	3	4	5	5	6	7	6	7	7	9	9	9	11	10	12	10	12	12	13	14	14	15	13	14	13	15	15	14	15
AGGAGGTCATATTCGG-1_1	0	0	0	0	0	0	0	0	0	0	0	0	0	0	6	2	6	1	6	1	4	6	6	7	3	6	5	5	3	3	6
AGGAGGTCATCCGTTC-1_1	0	0	0	0	0	0	4	4	4	5	5	5	5	0	3	3	3	3	3	2	2	0	0	0	0	1	4	0	0	0	13
AGGAGGTCATTGTCGA-1_1	0	0	0	0	0	0	0	0	0	0	0	0	0	0	6	2	6	1	6	1	4	6	6	7	3	6	5	5	3	3	6
AGGAGGTGTGAGTCAG-1_1	0	2	3	4	5	5	6	7	6	7	7	9	9	9	11	10	12	10	12	12	13	14	14	15	13	14	13	15	15	14	15
AGGAGGTTCACCGCTT-1_1	0	0	0	0	0	0	0	4	4	5	5	0	5	4	0	4	0	3	3	2	1	1	0	1	0	0	0	1	1	0	0
AGGATAAGTCCGTACG-1_1	0	0	0	0	0	0	0	0	0	0	0	0	0	0	6	2	6	1	6	1	4	6	6	7	3	6	5	5	3	3	6
AGGATAATCCATGATG-1_1	0	0	0	0	0	0	4	4	4	5	5	5	5	4	3	4	3	3	3	2	2	1	0	1	0	1	4	1	1	0	0
AGGCATTAGGGCAACT-1_1	0	0	0	0	0	0	4	4	4	5	5	5	5	4	3	4	3	3	3	2	2	1	0	1	0	1	4	1	1	0	0
AGGCATTCAAGACGAC-1_1	0	0	2	3	3	3	3	3	3	2	2	2	2	5	4	5	5	5	4	5	3	3	2	2	2	2	1	6	2	2	1
AGGCATTCATCTGGGC-1_1	0	0	0	0	4	4	5	5	5	6	6	6	6	6	7	7	7	7	7	6	5	5	5	5	6	5	6	4	5	5	5
AGGCATTGTCCTCCTA-1_1	0	0	0	0	4	4	5	5	5	6	6	6	6	6	7	7	7	7	7	6	5	5	5	5	6	5	6	4	5	5	5
AGGCCACAGTGCCTCG-1_1	0	4	5	6	7	7	8	10	10	10	10	11	11	13	14	14	16	15	16	17	17	18	18	18	18	18	18	18	19	19	20
AGGCCACCAAGACCGA-1_1	0	0	0	2	2	2	2	2	2	1	1	1	1	1	2	1	1	0	1	0	0	2	3	3	5	4	2	2	4	4	2
AGGCCACTCATTGTGG-1_1	0	0	0	2	2	2	2	2	2	1	1	1	1	1	2	1	1	0	1	0	0	2	3	3	5	4	2	2	4	4	2
AGGCCACTCGTCGCTT-1_1	0	1	1	1	1	1	1	1	1	4	4	4	4	2	5	6	4	6	5	4	6	4	4	4	4	3	3	3	8	9	3
AGGCTGCGTCTGTTAG-1_1	0	1	1	1	1	1	1	1	1	3	3	3	3	3	1	0	2	2	2	7	8	8	9	10	8	8	8	8	7	8	9
AGGCTGCTCTAGCAAC-1_1	0	0	0	0	0	0	4	4	4	5	5	5	5	4	3	4	3	3	3	2	2	1	0	1	0	1	4	1	1	0	0
AGGGAGTAGCTAAACA-1_1	0	0	0	2	2	2	2	6	7	8	8	7	7	7	8	8	8	8	8	10	10	10	8	8	9	10	9	10	10	6	10
AGGGCCTCACAGTCGC-1_1	0	1	1	1	1	1	1	1	1	3	3	3	3	3	1	0	2	2	2	8	7	7	7	6	7	7	7	7	6	7	8
AGGGCCTTCCAACTAG-1_1	0	0	0	2	2	2	2	2	2	1	1	1	1	1	2	1	1	0	1	0	0	2	3	3	5	4	2	2	4	4	2
AGGGCCTTCTCCTGTG-1_1	0	0	0	0	0	0	0	0	0	0	0	0	0	0	6	2	6	1	6	1	4	6	6	7	3	6	5	5	3	3	6
AGGGCTCAGACTCAAA-1_1	0	2	3	4	5	5	6	1	6	7	7	10	10	11	13	11	15	14	14	15	15	16	16	16	16	15	14	16	17	15	18
AGGGCTCAGCGCCCAT-1_1	0	1	1	1	1	1	1	1	1	4	4	4	4	2	1	0	4	6	5	4	9	4	4	4	4	3	3	3	12	11	14
AGGGCTCGTTCGGTAT-1_1	0	0	0	2	2	2	2	2	2	1	1	1	1	1	2	1	1	0	1	0	0	2	3	3	5	4	2	2	4	4	2
AGGGTCCTCTCCCTAG-1_1	0	0	0	0	0	0	0	0	0	0	0	0	0	0	0	3	0	4	0	3	1	0	10	0	1	0	0	0	0	1	13
AGGGTCCTCTCGAGTA-1_1	0	1	1	1	1	1	1	1	1	4	4	4	4	2	1	0	4	6	5	4	9	4	4	4	4	3	3	3	12	11	14
AGGGTGAAGAGAGGTA-1_1	0	0	0	2	2	2	2	6	7	8	8	7	7	7	8	8	8	8	8	10	10	10	8	8	9	10	9	10	10	6	10
AGGGTGACATCACCAA-1_1	0	0	0	0	0	0	4	4	4	5	5	5	5	0	3	3	3	3	3	2	2	0	0	0	0	1	4	0	0	0	13
AGGGTTTAGTCCTGCG-1_1	0	1	1	1	1	1	1	8	8	4	4	4	4	2	5	6	13	12	11	13	6	12	12	13	14	13	12	13	14	12	16
AGGGTTTCAGACTGCC-1_1	0	0	0	2	2	2	2	6	7	8	8	7	7	7	8	8	8	8	8	10	10	10	8	8	9	10	9	10	10	6	10
AGGGTTTGTACAAGTA-1_1	0	0	0	0	4	4	5	5	5	6	6	6	6	6	7	7	7	7	7	6	5	5	5	5	6	5	6	4	5	5	5
AGGGTTTGTACCTGTA-1_1	0	0	0	0	0	0	0	0	0	0	0	0	0	0	0	2	0	1	0	1	4	8	1	9	3	8	0	0	3	3	9
AGGTAGGGTAGCTTAC-1_1	0	2	3	4	5	5	6	7	6	7	7	9	9	9	11	10	12	10	12	12	13	14	14	15	13	14	13	15	15	14	15
AGGTAGGGTGCCAAGA-1_1	0	1	1	1	1	1	1	1	1	4	4	4	4	2	5	6	4	6	5	4	9	4	4	4	4	3	3	3	8	9	3
AGGTAGGTCAGCTCTC-1_1	0	0	2	3	3	3	3	3	3	2	2	2	2	5	6	5	6	5	6	1	4	6	6	7	2	6	1	9	2	2	6
AGGTCATCATGACGGA-1_1	0	0	0	2	2	2	2	2	2	1	1	1	1	1	2	1	1	0	1	0	0	2	3	3	5	4	2	2	4	4	2
AGGTCATGTCCATACA-1_1	0	0	0	1	1	1	1	1	1	3	3	3	3	3	1	0	2	2	2	7	8	8	9	10	8	8	8	8	7	8	9
AGGTCATGTGAATAAC-1_1	0	1	1	1	1	1	1	1	1	3	3	3	3	3	1	0	2	2	2	8	7	7	7	6	7	7	7	7	6	7	8
AGGTCTATCATGGCCG-1_1	0	0	2	3	3	3	3	3	3	2	2	2	2	5	4	5	5	5	4	5	3	3	2	2	2	2	1	6	2	2	1
AGGTGTTAGTAGAGTT-1_1	0	0	0	2	2	2	2	6	7	8	8	7	7	7	8	8	8	8	8	10	10	10	8	8	9	10	9	10	10	6	10
AGGTGTTTCCTGTTAT-1_1	0	0	0	1	1	1	1	1	1	3	3	3	3	3	1	0	2	2	2	7	8	8	9	10	8	8	8	8	7	8	9
AGGTGTTTCGAGTGGA-1_1	0	0	0	2	4	4	5	5	7	6	6	7	7	6	8	8	7	7	8	10	10	5	8	5	6	5	6	4	10	5	10
AGGTGTTTCTCGTTTA-1_1	0	2	3	4	5	5	6	7	6	7	7	10	10	11	13	11	15	14	14	15	15	16	16	16	16	15	14	16	17	15	18
AGGTGTTTCTCTCAAT-1_1	0	1	1	1	1	1	1	1	1	4	4	4	4	2	5	6	4	6	5	4	6	4	4	4	4	3	3	3	8	9	3
AGGTTACAGCCGAACA-1_1	0	0	0	2	2	2	2	2	2	1	1	1	1	12	9	13	10	13	10	11	12	11	11	12	11	11	10	12	11	10	11
AGGTTACAGTCAAGCG-1_1	0	0	2	3	3	3	3	3	3	2	2	2	2	5	4	5	5	5	4	5	3	3	2	2	2	2	1	6	2	2	1
AGGTTACCAAAGCAAT-1_1	0	0	0	0	0	0	0	4	0	5	0	0	5	0	0	3	3	4	0	3	1	0	1	1	1	0	0	0	0	1	4
AGGTTGTAGTCACTCA-1_1	0	0	0	2	2	2	2	2	0	1	0	1	1	1	8	1	9	8	9	9	11	9	8	9	10	9	9	11	9	6	7
AGGTTGTCAAGTACCT-1_1	0	0	0	2	2	2	2	2	2	1	1	1	1	1	2	1	1	0	1	0	0	2	3	3	5	4	2	2	4	4	2
AGGTTGTCACGCTATA-1_1	0	0	0	0	0	0	4	4	4	5	5	5	5	4	3	4	3	3	3	2	2	1	0	1	0	1	4	1	1	0	0
AGGTTGTCATAACAGA-1_1	0	0	0	2	2	2	2	2	2	1	1	1	1	1	2	1	1	0	1	0	0	13	13	11	12	12	11	14	13	13	12
AGTAACCAGACGCATG-1_1	0	0	0	0	4	4	5	5	5	6	6	6	6	6	7	7	7	7	7	6	5	5	5	5	6	5	6	4	5	5	5
AGTAACCAGTACTGGG-1_1	0	0	0	2	2	2	2	6	7	8	8	7	7	7	8	8	8	8	8	10	10	10	8	8	9	10	9	10	10	6	10
AGTAACCAGTATGACA-1_1	0	4	5	6	7	7	8	10	10	10	10	11	11	13	14	14	16	15	16	17	17	18	18	18	18	18	18	18	19	19	20
AGTAACCGTAGCTTGT-1_1	0	0	0	0	4	4	5	5	5	6	6	6	6	6	7	7	7	7	7	6	5	5	5	5	6	5	6	4	5	5	5
AGTACCACAACCTATG-1_1	0	2	3	4	5	5	6	7	6	7	7	9	9	9	11	10	12	10	12	12	13	14	14	15	13	14	13	15	15	14	15
AGTACCATCATTACGG-1_1	0	0	0	0	0	0	0	0	0	0	0	0	0	0	6	2	6	1	6	1	4	6	6	7	3	6	5	5	3	3	6
AGTACTGCAAATGAAC-1_1	0	0	0	2	2	2	2	2	2	1	1	1	1	1	2	1	1	0	1	0	0	2	3	3	5	4	2	2	4	4	2
AGTACTGCATAGATCC-1_1	0	1	1	1	1	1	1	1	1	3	3	3	3	3	1	0	2	2	2	8	7	7	7	6	7	7	7	7	6	7	8
AGTACTGGTATTGAGA-1_1	0	1	1	1	1	1	1	1	1	4	4	4	4	2	1	0	4	6	5	4	9	4	4	4	4	3	3	3	12	11	3
AGTAGCTAGCGAGTAC-1_1	0	0	0	0	0	0	0	0	0	0	0	0	0	0	0	2	0	1	0	1	4	0	1	9	3	8	5	0	3	3	7
AGTAGCTCAACGCCCA-1_1	0	0	2	3	3	3	3	3	3	2	2	2	2	10	12	12	14	11	13	14	14	15	15	14	15	16	15	9	16	16	17
AGTAGCTGTCAGACTT-1_1	0	0	0	0	0	0	4	4	4	5	5	5	5	4	3	4	3	3	3	2	2	1	0	1	0	1	4	1	1	0	0
AGTAGCTTCACGATAC-1_1	0	0	0	2	2	2	2	2	2	1	1	1	1	1	2	1	1	0	1	0	0	13	13	11	12	12	11	14	13	13	12
AGTAGTCGTTAAGGAT-1_1	0	0	0	2	2	2	2	2	2	1	1	1	1	1	2	1	1	0	1	0	0	13	13	11	12	12	11	14	13	13	12
AGTAGTCTCTCTAAGG-1_1	0	2	3	4	5	5	6	7	6	7	7	9	9	9	11	10	12	10	12	12	13	14	14	15	13	14	13	15	15	14	15
AGTCAACGTGTTTGCA-1_1	0	0	0	2	2	2	2	2	2	1	1	1	1	1	6	2	6	1	6	1	4	6	6	11	3	6	5	5	3	3	6
AGTCACACAACTAGAA-1_1	0	0	0	0	0	0	0	0	0	0	0	0	0	0	6	2	6	1	6	1	4	6	6	7	3	6	5	5	3	3	6
AGTCACACAGTCAGTT-1_1	0	0	0	0	0	0	4	4	4	5	5	5	5	0	3	3	3	3	3	2	2	0	0	0	0	1	4	0	0	0	13
AGTCACAGTAGCTCGC-1_1	0	0	0	0	0	0	0	0	0	0	0	0	0	0	8	8	9	8	9	9	11	9	8	8	10	9	9	11	9	6	7
AGTCATGCAATGCAAA-1_1	0	0	0	0	4	4	5	5	5	6	6	6	6	6	7	7	7	7	7	6	5	5	5	5	6	5	6	4	5	5	5
AGTCATGGTGTAGGAC-1_1	0	1	1	1	1	1	1	1	1	4	4	4	4	2	5	6	4	6	5	4	6	4	4	4	4	3	3	3	8	9	3
AGTCTCCAGGGCAGTT-1_1	0	1	1	1	1	1	1	1	1	3	3	3	3	3	1	0	2	2	2	8	7	7	7	6	7	7	7	7	6	7	8
AGTCTCCGTCCGGCAT-1_1	0	0	0	2	2	2	2	2	2	1	1	1	1	1	2	1	1	0	1	0	0	2	3	3	5	4	2	2	4	4	2
AGTCTCCTCAGGTGTT-1_1	0	0	0	2	2	2	2	6	7	8	8	7	7	7	8	8	8	8	8	10	10	10	8	8	9	10	9	10	10	6	10
AGTCTCCTCGATGCTA-1_1	0	0	0	0	0	0	0	0	0	0	0	0	0	0	0	2	9	1	9	9	11	9	10	9	10	9	16	11	9	17	7
AGTGACTCACCTGAAT-1_1	0	0	0	0	0	0	4	4	4	5	5	5	5	4	3	4	3	3	3	2	2	1	0	1	0	1	4	1	1	0	0
AGTGACTCATAATGCC-1_1	0	2	3	4	5	5	6	7	6	7	7	9	9	9	11	10	12	10	12	12	13	14	14	15	13	14	13	15	15	14	15
AGTGACTGTAGTACGG-1_1	0	0	0	0	0	0	4	4	4	5	5	5	5	4	3	4	3	3	3	2	2	1	0	1	0	1	4	1	1	0	0
AGTGACTGTCATGGCC-1_1	0	0	0	0	0	0	0	0	0	0	0	0	0	0	6	2	6	1	6	1	4	6	6	11	3	6	5	5	3	3	6
AGTGACTGTCGATGCC-1_1	0	0	0	0	4	4	5	5	5	6	6	6	6	6	7	7	7	7	7	6	5	5	5	5	6	5	6	4	5	5	5
AGTGATCAGTTTAGGA-1_1	0	0	0	2	2	2	2	2	2	1	1	1	1	1	2	1	1	0	1	0	0	2	3	3	5	4	2	2	4	4	2
AGTGATCCAAGCTGCC-1_1	0	0	0	2	2	2	2	2	2	1	1	1	1	1	2	1	1	0	1	1	0	13	13	11	12	12	11	14	13	13	12
AGTGATCTCGGCCCAA-1_1	0	0	0	2	2	2	2	6	7	8	8	7	7	7	8	8	8	8	8	10	10	10	8	8	9	10	9	10	10	6	10
AGTGATCTCGTCTACC-1_1	0	0	2	3	3	3	3	3	3	2	2	2	2	5	4	5	5	5	4	5	3	3	2	2	2	2	1	6	2	2	1
AGTGCCGGTATCAGGG-1_1	0	0	0	2	2	2	2	2	2	1	1	1	1	1	2	1	1	0	1	0	0	2	3	3	5	4	2	2	4	4	2
AGTGCCGGTATGGAAT-1_1	0	0	2	3	3	3	3	3	3	2	2	2	2	5	4	5	5	5	4	5	3	3	2	2	2	2	1	6	2	2	1
AGTGCCGTCATCTACT-1_1	0	0	0	0	0	0	0	0	0	0	0	0	0	0	6	2	6	1	6	1	4	6	6	7	3	6	5	5	3	3	6
AGTGCCGTCGGCTTCT-1_1	0	0	0	0	4	4	5	5	5	6	6	6	6	6	7	7	7	7	7	6	5	5	5	5	6	5	6	4	5	5	5
AGTTAGCAGCTGTTAC-1_1	0	1	1	1	1	1	1	1	1	4	4	4	4	2	1	0	4	6	5	4	9	4	4	4	4	3	3	3	12	11	14
AGTTAGCAGGGTGAGG-1_1	0	1	1	1	1	1	1	1	1	3	3	3	3	2	1	0	4	6	5	4	7	4	7	6	7	3	7	3	8	9	3
AGTTCCCAGCGTTGTT-1_1	0	0	0	0	0	0	4	4	4	5	5	5	5	4	3	4	3	3	3	2	2	1	0	1	0	1	4	1	1	0	0
AGTTCCCTCGGAACTT-1_1	0	0	0	0	0	0	0	0	0	0	0	0	0	0	0	2	0	1	0	1	4	0	1	9	3	9	5	0	3	3	7
AGTTCGAAGCTCTTCC-1_1	0	2	3	4	5	5	6	7	6	7	7	9	9	9	11	10	12	10	12	12	13	14	14	15	13	14	13	15	15	14	15
AGTTCGATCAATCTTC-1_1	0	0	0	0	0	0	4	4	4	5	5	5	5	0	3	3	3	3	3	2	2	0	0	0	0	1	4	0	0	0	13
AGTTCGATCCATCTGC-1_1	0	0	0	2	2	2	2	2	2	1	1	1	1	1	2	1	1	0	1	0	0	2	3	3	5	4	2	2	4	4	2
ATACCGAAGAGAGAAC-1_1	0	0	0	0	0	0	0	0	0	0	0	0	0	0	0	2	9	1	9	9	11	9	10	9	10	9	16	11	9	17	7
ATACCGAGTGGCTGCT-1_1	0	0	0	0	0	0	0	0	0	0	0	0	0	0	0	2	0	1	0	1	4	0	1	9	3	9	5	0	3	3	7
ATACCGAGTGTCATCA-1_1	0	0	0	2	2	2	2	6	7	8	8	7	7	7	8	8	8	8	8	10	10	10	8	8	9	10	9	10	10	6	10
ATACCGATCCACGTCT-1_1	0	0	0	2	2	2	2	2	2	1	1	1	1	1	2	1	1	0	1	0	0	2	3	3	5	4	2	2	4	4	2
ATACCTTCAAGAAACT-1_1	0	1	1	1	1	1	1	8	8	4	4	4	4	2	5	6	13	12	11	13	6	12	12	13	14	13	12	13	14	12	16
ATACCTTCAGGTAGTG-1_1	0	0	0	1	1	1	1	1	1	3	3	3	3	3	1	0	2	2	2	7	8	8	9	10	8	8	8	8	7	8	9
ATACCTTCATAACCCA-1_1	0	0	0	2	2	2	2	6	2	1	1	1	1	1	8	8	8	8	8	0	0	9	8	8	9	12	9	10	13	6	12
ATACCTTGTAGAGATT-1_1	0	0	0	0	0	0	0	0	0	0	0	0	0	0	6	2	6	1	6	1	4	6	6	7	3	6	5	5	3	3	6
ATACCTTGTGAATTAG-1_1	0	0	0	0	0	0	0	0	0	0	0	0	0	0	6	2	6	1	6	1	4	6	6	11	3	6	5	5	3	3	6
ATACCTTTCCGGTTCT-1_1	0	0	0	2	2	2	2	6	2	1	1	1	1	1	8	8	8	0	1	0	0	9	8	8	9	12	11	10	13	6	12
ATACTTCAGCCGGAAT-1_1	0	0	0	0	4	4	5	5	5	6	6	6	6	6	7	7	7	7	7	6	5	5	5	5	6	5	6	4	5	5	5
ATACTTCAGTCATGAA-1_1	0	0	0	0	1	0	0	0	0	0	3	3	0	0	1	0	2	2	2	7	8	8	9	10	8	8	8	8	7	8	9
ATACTTCAGTTACGGG-1_1	0	0	0	0	4	4	5	5	5	6	6	6	6	6	7	7	7	7	7	6	5	5	5	5	6	5	6	4	5	5	5
ATACTTCCAAGGGTCA-1_1	0	0	0	2	2	2	2	2	2	1	1	1	1	1	2	1	1	0	1	0	0	2	3	3	5	4	2	2	4	4	2
ATACTTCGTCTGTAGT-1_1	0	0	0	0	0	0	0	0	4	0	0	0	5	0	0	3	0	4	0	3	1	0	0	0	1	0	0	0	0	1	4
ATACTTCGTGAATTAG-1_1	0	0	2	3	3	3	3	3	3	2	2	2	2	5	4	5	5	5	4	5	3	3	2	2	2	2	1	6	2	2	1
ATACTTCGTTGGCCTG-1_1	0	0	2	3	3	3	3	3	3	2	2	2	2	5	4	5	5	5	4	5	3	3	2	2	2	2	1	6	2	2	1
ATACTTCTCCTCAGGG-1_1	0	0	0	0	4	4	5	5	5	6	6	6	6	6	7	7	7	7	7	6	5	5	5	5	6	5	6	4	5	5	5
ATAGACCGTAAGACCG-1_1	0	2	3	4	5	5	6	7	6	7	7	10	10	11	13	11	15	14	14	15	15	16	16	16	16	15	14	16	17	15	18
ATAGACCTCATTTGTC-1_1	0	1	1	1	1	1	1	8	8	4	4	4	4	2	5	6	4	6	11	4	6	12	12	13	4	13	12	13	14	12	3
ATAGAGAAGAACCCGA-1_1	0	1	1	1	1	1	1	8	8	4	4	4	4	2	5	6	13	12	11	13	6	12	12	13	14	13	12	13	14	12	16
ATAGAGAAGCACTGGA-1_1	0	2	3	4	5	5	6	7	6	7	7	9	9	9	11	10	12	10	12	12	13	14	14	15	13	14	13	15	15	14	15
ATAGAGACACGTGAGA-1_1	0	1	1	1	1	1	1	1	1	4	4	4	4	2	1	0	4	6	5	4	9	4	4	4	4	3	3	3	12	11	14
ATAGAGAGTTCGAAGG-1_1	0	0	0	2	2	2	2	6	2	1	1	1	1	1	8	8	8	0	1	0	0	13	8	8	9	12	11	10	13	6	12
ATAGGCTCAAGATTGA-1_1	1	6	7	8	10	10	11	13	13	13	13	14	14	16	17	17	19	18	20	21	21	22	22	22	22	22	22	22	23	23	24
ATATCCTAGTTGGCTT-1_1	0	0	0	2	2	2	2	2	2	1	1	1	1	1	2	1	1	0	1	0	0	2	3	3	5	4	2	2	4	4	2
ATATCCTCAAACACCT-1_1	0	4	5	6	7	7	8	10	10	10	10	11	11	13	14	14	16	15	16	17	17	18	18	18	18	18	18	18	19	19	20
ATATCCTCATCCGCGA-1_1	0	1	1	1	1	1	1	8	8	4	4	4	4	2	5	6	13	12	11	13	6	12	12	13	14	13	12	13	14	12	16
ATATCCTGTTGCGTAT-1_1	0	0	2	3	3	3	3	3	3	2	2	2	2	10	12	12	14	11	13	14	14	15	15	14	15	16	15	9	16	16	17
ATATCCTTCATGCAGT-1_1	0	0	0	0	0	0	0	0	0	0	0	0	0	0	6	2	6	1	6	1	4	6	6	7	3	6	5	5	3	3	6
ATCACAGAGCAGCGAT-1_1	0	1	1	1	1	1	1	1	1	3	3	3	3	3	1	0	2	2	2	8	7	7	7	6	7	7	7	7	6	7	8
ATCACAGAGTGCCAGA-1_1	0	0	0	0	0	0	0	0	0	0	0	0	0	0	6	2	6	1	6	1	4	6	6	7	3	6	5	5	3	3	6
ATCACAGCACTCAAGT-1_1	0	0	0	0	0	0	4	4	4	5	5	5	5	4	3	4	3	3	3	2	2	1	0	1	0	1	4	1	1	0	0
ATCACAGTCCAACACA-1_1	0	0	0	2	2	2	2	2	2	1	1	1	1	1	2	1	1	0	1	0	0	2	3	3	5	4	2	2	4	4	2
ATCACAGTCTAGGCAT-1_1	0	0	0	0	4	4	5	5	5	6	6	6	6	6	7	7	7	7	7	6	5	5	5	5	6	5	6	4	5	5	5
ATCACGAAGTAACCTC-1_1	0	0	0	0	0	0	4	4	4	5	5	5	5	4	3	4	3	3	3	2	2	1	0	1	0	1	4	1	1	0	0
ATCACGACAACAAAGT-1_1	0	1	1	1	1	1	1	1	1	4	4	4	4	2	1	0	4	6	5	4	9	4	4	4	4	3	3	3	12	11	14
ATCACTTAGCTGAGTG-1_1	0	0	0	0	4	4	5	5	5	6	6	6	6	6	7	7	7	7	7	6	5	5	5	5	6	5	6	4	5	5	5
ATCACTTGTTAGGACG-1_1	0	0	0	0	4	4	5	5	5	6	6	6	6	6	7	7	7	7	7	6	5	5	5	5	6	5	6	4	5	5	5
ATCAGGTAGAGCACTG-1_1	0	1	1	1	1	1	1	1	1	4	4	4	4	2	1	0	4	6	5	4	9	4	4	4	4	3	3	3	12	11	14
ATCAGGTAGCATCCTA-1_1	0	0	0	1	1	1	1	1	1	3	3	3	3	3	1	0	2	2	2	7	8	8	9	10	8	8	8	8	7	8	9
ATCAGGTGTATGCAAA-1_1	0	1	1	1	1	1	1	8	8	4	4	4	4	2	5	6	4	6	11	4	6	12	12	13	4	13	12	13	14	12	3
ATCAGGTTCTCAACGA-1_1	0	1	1	1	1	1	1	1	1	4	4	4	4	2	5	6	4	6	5	4	6	4	4	4	4	3	3	3	8	9	3
ATCATTCCATAGGCGA-1_1	0	0	0	1	1	1	1	1	1	3	3	3	3	3	1	0	2	2	2	7	8	8	9	10	8	8	8	8	7	8	9
ATCATTCCATCTCATT-1_1	0	0	0	0	4	4	5	5	5	6	6	6	6	6	7	7	7	7	7	6	5	5	5	5	6	5	6	4	5	5	5
ATCCACCCACTAGGCC-1_1	0	0	0	2	2	2	2	2	2	1	1	1	1	1	2	1	1	0	1	0	0	2	3	3	5	4	2	2	4	4	2
ATCCACCGTTGGGAAC-1_1	0	0	2	3	3	3	3	3	3	2	2	2	2	5	4	5	5	5	4	5	3	3	2	2	2	2	1	6	2	2	1
ATCCATTAGGGCTAAC-1_1	0	0	0	0	2	2	0	6	0	8	0	0	7	7	8	8	9	8	9	9	11	9	8	8	10	9	9	11	9	6	7
ATCCATTAGTGCCCGT-1_1	0	0	0	0	0	0	0	0	0	0	0	0	0	0	0	3	0	4	0	3	1	0	1	0	1	0	0	0	0	1	4
ATCCATTCACGTCGGT-1_1	0	0	0	0	0	0	0	0	0	0	0	0	0	0	0	3	0	4	0	3	1	0	1	0	1	0	0	0	0	1	4
ATCCCTGCACCGCTAG-1_1	0	0	0	2	2	2	2	6	7	8	8	7	7	7	8	8	8	8	8	10	10	10	8	8	9	10	9	10	10	6	10
ATCCCTGGTTTCCATT-1_1	0	0	2	3	3	3	3	3	3	2	2	2	2	5	4	5	5	5	4	5	3	3	2	2	2	2	1	6	2	2	1
ATCCCTGTCCATGATG-1_1	0	0	0	0	0	0	0	0	0	0	0	0	0	0	6	2	6	1	6	1	4	6	6	11	3	6	5	5	3	3	6
ATCCGTCTCACTGAAC-1_1	0	0	0	0	0	0	4	4	4	5	5	5	5	4	3	4	3	3	3	2	2	1	0	1	0	1	4	1	1	0	0
ATCCTATAGTGATCGG-1_1	0	0	0	2	2	2	2	2	2	1	1	1	1	1	2	1	1	0	1	0	0	13	13	11	12	12	11	14	13	13	12
ATCCTATGTCGTGGAA-1_1	0	0	0	0	0	0	0	0	0	0	0	0	0	0	0	2	0	1	0	1	4	0	1	7	3	6	5	0	3	3	6
ATCGATGAGCTCGACC-1_1	0	0	2	3	3	3	3	3	3	2	2	2	2	5	4	5	5	5	4	5	3	3	2	2	2	2	1	6	2	2	1
ATCGATGAGTGGTTGG-1_1	0	0	2	3	3	3	3	3	3	2	2	2	2	5	4	5	5	5	4	5	3	3	2	2	2	2	1	6	2	2	1
ATCGATGCAACACAGG-1_1	0	0	2	3	3	3	3	3	3	2	2	2	2	5	4	5	5	5	4	5	3	3	2	2	2	2	1	9	2	2	1
ATCGATGCACACCTTC-1_1	0	0	2	3	3	3	3	3	3	2	2	2	2	5	4	5	5	5	4	5	3	3	2	2	2	2	1	6	2	2	1
ATCGATGCACAGGATG-1_1	0	0	0	0	0	0	0	0	0	0	0	0	0	0	6	2	6	1	6	1	4	6	6	7	3	6	5	5	3	3	6
ATCGATGGTGGCTAGA-1_1	0	0	2	3	3	3	3	3	3	2	2	2	2	10	12	12	14	11	13	14	14	15	15	14	15	16	15	9	16	16	17
ATCGCCTGTACCGGAA-1_1	0	0	0	0	0	0	0	0	0	0	0	0	0	0	0	2	0	1	0	1	1	0	1	9	3	0	0	0	3	3	7
ATCGCCTGTGGTATGG-1_1	0	0	3	4	5	5	6	7	6	7	7	10	10	11	13	11	15	14	14	15	15	16	16	16	16	15	14	16	17	15	18
ATCGCCTGTTGACTGT-1_1	0	0	0	2	2	2	2	2	2	1	1	1	1	1	2	1	1	0	1	0	0	2	3	3	5	4	2	2	4	4	2
ATCGCCTTCATACGGT-1_1	0	1	1	1	1	1	1	1	1	4	4	4	4	2	5	6	4	6	5	4	6	4	4	4	4	3	3	3	8	9	3
ATCGGATAGTATGCAA-1_1	0	0	0	0	0	0	4	4	4	5	5	5	5	4	3	4	3	3	3	2	2	1	0	1	0	1	4	1	1	0	0
ATCGGATCAGACAAAT-1_1	0	0	0	2	2	2	2	2	2	1	1	1	1	1	2	1	1	0	1	0	0	2	3	3	5	4	2	2	4	4	2
ATCGGATTCAAGGAGC-1_1	0	0	0	2	2	2	2	2	2	1	1	1	1	1	2	1	1	0	1	0	0	2	3	3	5	4	2	2	4	4	2
ATCGGATTCGCTAAAC-1_1	0	0	0	0	0	0	0	0	0	0	0	0	0	0	6	2	6	1	6	1	4	6	6	7	3	6	5	5	3	3	6
ATCGGCGCAGATCACT-1_1	0	1	1	1	1	1	1	1	1	4	4	4	4	2	5	6	4	6	5	4	6	4	4	4	4	3	3	3	8	9	3
ATCGGCGTCCATATGG-1_1	0	0	2	3	3	3	3	3	3	2	2	2	2	10	12	12	14	11	13	14	14	15	15	14	15	16	15	9	16	16	17
ATCGGCGTCTAACGCA-1_1	0	0	0	0	0	0	4	4	4	5	5	5	5	4	3	4	3	3	3	2	2	1	0	1	0	1	4	1	1	0	0
ATCGTAGTCATCACAG-1_1	0	0	0	2	2	2	2	2	2	1	1	1	1	12	9	13	10	13	10	11	12	11	11	12	11	11	10	12	11	10	11
ATCGTCCAGCCACTCG-1_1	0	1	1	1	1	1	1	1	1	3	3	3	3	3	1	0	2	2	2	8	7	7	7	6	7	7	7	7	6	7	8
ATCGTCCGTGCCTTCT-1_1	0	0	0	0	0	0	4	4	4	5	5	5	5	4	3	4	3	3	3	2	2	1	0	1	0	1	4	1	1	0	0
ATCGTGACAAACCACT-1_1	0	0	2	3	3	3	3	3	3	2	2	2	2	10	12	12	14	11	13	14	14	15	15	14	15	16	15	9	16	16	17
ATCGTGATCACCATAG-1_1	0	2	3	4	5	5	6	7	6	7	7	9	9	9	11	10	12	10	12	12	13	14	14	15	13	14	13	15	15	14	15
ATCGTGATCTGTCGCT-1_1	0	0	0	0	0	0	0	0	0	0	0	0	0	0	0	2	0	1	0	1	4	0	1	9	3	0	0	0	3	3	7
ATCTCTAAGGAAGAAC-1_1	0	0	0	2	2	2	2	2	2	1	1	1	1	1	2	1	1	0	1	0	0	2	3	3	5	4	2	2	4	4	2
ATCTCTACAAGAGTGC-1_1	0	1	1	1	1	1	1	1	1	4	4	4	4	2	5	6	4	6	5	4	9	4	4	4	4	3	3	3	8	9	3
ATCTCTACATCAGTCA-1_1	0	0	0	2	2	2	2	2	2	1	1	1	1	1	2	1	1	0	1	0	0	2	3	3	5	4	2	2	4	4	2
ATCTCTATCTAGGCCG-1_1	0	0	2	3	3	3	3	3	3	2	2	2	2	5	4	5	5	5	4	5	3	3	2	2	2	2	1	5	2	2	1
ATCTTCAAGACGCCCT-1_1	0	0	0	0	0	0	0	0	0	0	0	0	0	0	6	2	6	1	6	1	4	6	6	11	3	6	5	5	3	3	6
ATGAAAGCACAAGCTT-1_1	0	4	5	6	7	7	8	10	10	10	10	11	11	13	14	14	16	15	16	17	17	18	18	18	18	18	18	18	19	19	20
ATGAAAGTCCACGTGG-1_1	0	1	1	1	1	1	1	1	1	4	4	4	4	2	1	0	4	6	5	4	9	4	4	4	4	3	3	3	12	11	14
ATGAAAGTCTCAGTCC-1_1	0	0	2	3	3	3	3	3	3	2	2	2	2	5	4	5	5	5	4	5	3	3	2	2	2	2	1	6	2	2	1
ATGACCAAGGCCTTGC-1_1	0	0	0	0	0	0	0	0	0	0	0	0	0	0	0	3	0	4	0	3	1	0	1	0	1	0	0	0	0	1	4
ATGACCACAACTGAAA-1_1	0	0	0	0	0	0	0	0	0	0	0	0	0	0	0	3	0	4	0	3	1	0	10	0	1	0	0	0	0	1	13
ATGACCATCCCTATTA-1_1	0	0	0	0	0	0	0	0	0	0	0	0	0	0	0	3	0	4	0	3	1	0	1	0	1	0	0	0	0	1	4
ATGAGGGAGGCATCAG-1_1	0	0	0	0	0	0	0	0	0	0	0	0	0	0	0	3	0	4	0	3	1	0	1	0	1	0	0	0	0	1	4
ATGAGGGCACTGCACG-1_1	0	1	1	1	1	1	1	1	1	4	4	4	4	2	5	6	4	6	5	4	6	4	4	4	4	3	3	3	8	9	3
ATGAGGGCATCGCTCT-1_1	0	0	0	2	2	2	2	6	7	8	8	7	7	7	8	8	8	8	8	10	10	10	8	8	9	10	9	10	10	6	10
ATGAGGGGTCCATCTC-1_1	0	0	0	0	0	0	0	0	0	0	0	0	0	0	0	3	0	4	0	3	1	0	1	0	1	0	0	0	0	1	4
ATGAGGGGTGACTATC-1_1	0	0	2	3	3	3	3	3	3	2	2	2	2	10	12	12	14	11	13	14	14	15	15	14	15	16	15	9	16	16	17
ATGAGTCAGGCAGCTA-1_1	0	0	0	0	4	4	5	5	5	6	6	6	6	6	7	7	7	7	7	6	5	5	5	5	6	5	6	4	5	5	5
ATGAGTCGTCGCCACA-1_1	0	3	4	5	6	6	7	9	9	9	9	8	8	8	10	9	11	9	15	16	16	17	17	17	17	17	17	17	18	18	19
ATGATCGAGTCACTAC-1_1	0	0	0	2	2	2	2	2	2	1	1	0	1	1	2	1	1	0	1	0	0	2	3	3	5	4	2	2	4	4	2
ATGATCGCAGCGACAA-1_1	0	0	0	0	0	0	4	4	4	5	5	5	5	4	3	4	3	3	3	2	2	1	0	1	0	1	4	1	1	0	0
ATGATCGGTGTCTAAC-1_1	0	2	3	4	5	5	6	7	6	7	7	9	9	9	11	10	12	10	12	12	13	14	14	15	13	14	13	15	15	14	15
ATGATCGTCTCAACGA-1_1	0	1	1	1	1	1	1	8	8	4	4	4	4	2	5	6	13	12	11	13	6	12	12	13	14	13	12	13	14	12	16
ATGCATGAGCGACCCT-1_1	1	6	7	8	10	10	11	13	13	13	13	14	14	16	17	17	19	18	20	21	21	22	22	22	22	22	22	22	23	23	24
ATGCATGAGCTGTTAC-1_1	0	0	0	0	4	4	5	5	5	6	6	6	6	6	7	7	7	7	7	6	5	5	5	5	6	5	6	4	5	5	5
ATGCATGCACTAGAGG-1_1	0	1	1	1	1	1	1	8	8	4	4	4	4	2	5	6	13	12	11	13	6	12	12	13	14	13	12	13	14	12	16
ATGCATGGTGTAGGAC-1_1	0	2	3	4	5	5	6	7	6	7	7	9	9	9	11	10	12	10	12	12	13	14	14	15	13	14	13	15	15	14	15
ATGCATGTCAGGACAG-1_1	0	2	3	4	5	5	6	7	6	7	7	9	9	9	11	10	12	10	12	12	13	14	14	15	13	14	13	15	15	14	15
ATGCATGTCATACAGC-1_1	0	0	2	3	3	3	3	3	3	2	2	2	2	10	12	12	14	11	13	14	14	15	15	14	15	16	15	9	16	16	17
ATGCCTCGTACTCCCT-1_1	0	1	1	1	1	1	1	1	1	4	4	4	4	2	5	6	4	6	5	4	6	4	4	4	4	3	3	3	8	9	3
ATGCCTCGTCCTCAGG-1_1	0	2	3	4	5	5	6	7	6	7	7	9	9	9	11	10	12	10	12	12	13	14	14	15	13	14	13	15	15	14	15
ATGCGATAGCAAACAT-1_1	0	0	0	2	2	2	2	2	2	1	1	1	1	1	2	1	1	0	1	0	0	13	3	3	12	12	11	14	13	4	12
ATGCGATGTGGACTAG-1_1	0	0	0	0	4	4	5	5	5	6	6	6	6	6	7	7	7	7	7	6	5	5	5	5	6	5	6	4	5	5	5
ATGCGATGTTGCACGC-1_1	0	0	0	0	0	0	0	0	0	0	0	0	0	0	6	2	6	1	6	1	4	6	6	7	3	6	5	5	3	3	6
ATGGAGGAGACGTCCC-1_1	0	1	1	1	1	1	1	1	1	4	4	4	4	2	5	6	4	6	5	4	9	4	4	4	4	3	3	3	8	9	3
ATGGAGGAGAGTTCGG-1_1	0	0	0	1	1	1	1	1	1	3	3	3	3	3	1	0	2	2	2	7	8	8	9	10	8	8	8	8	7	8	9
ATGGAGGCAAAGGCGT-1_1	0	0	0	2	2	2	2	2	2	1	1	1	1	12	9	13	10	13	10	11	12	11	11	12	11	11	10	12	11	10	11
ATGGAGGTCTCATGGA-1_1	0	1	1	1	1	1	1	1	1	3	3	3	3	3	1	0	2	2	2	8	7	7	7	6	7	7	7	7	6	7	8
ATGGATCGTACTGCGC-1_1	0	0	0	0	0	0	4	4	4	5	5	5	5	4	3	4	3	3	3	2	2	1	0	1	0	11	4	1	1	0	0
ATGGATCGTGGAAGTC-1_1	0	0	0	1	1	1	1	1	1	3	3	3	3	3	1	0	2	2	2	7	8	8	9	10	8	8	8	8	7	8	9
ATGGATCTCACACGAT-1_1	0	0	3	4	5	5	6	7	6	7	7	10	10	11	13	11	15	14	14	15	15	16	16	16	16	15	14	16	17	15	18
ATGGGAGAGATAACAC-1_1	0	0	0	0	0	0	0	0	0	0	0	0	0	0	0	3	0	4	0	3	1	0	1	0	1	0	0	0	0	1	13
ATGGGAGTCTGGTGGC-1_1	0	1	1	1	1	1	1	1	1	4	4	4	4	2	5	6	4	6	5	4	6	4	4	4	4	3	3	3	8	9	3
ATGGGTTAGTCGTCTA-1_1	0	0	0	2	2	2	2	2	2	1	1	1	1	1	2	1	1	0	1	0	0	2	3	3	5	4	2	2	4	4	2
ATGGGTTCAATGTCAC-1_1	0	0	0	0	0	0	0	0	0	0	0	0	0	0	0	3	0	4	0	3	1	0	10	0	1	0	0	0	0	1	13
ATGGGTTCAGTACTAC-1_1	0	3	4	5	6	6	7	9	9	9	9	8	8	8	10	9	11	9	17	18	18	19	19	19	19	19	19	19	20	20	21
ATGGGTTCATTAAGCC-1_1	0	0	0	2	2	2	2	6	2	1	1	1	1	1	2	8	8	0	1	0	0	10	8	8	9	10	9	10	10	6	10
ATGGGTTGTGGGTATG-1_1	0	1	1	1	1	1	1	1	1	3	3	3	3	3	1	0	2	2	2	8	7	7	7	6	7	7	7	7	6	7	8
ATGGGTTTCGCAATGT-1_1	0	0	0	0	0	0	0	4	4	5	5	0	5	4	0	4	0	3	3	2	1	1	0	1	0	0	0	1	1	0	0
ATGGTTGAGATCCCGC-1_1	0	0	2	3	3	3	3	3	3	2	2	2	2	5	4	5	5	5	4	5	3	3	2	2	2	2	1	9	2	2	1
ATGGTTGCATGGGCAA-1_1	0	0	0	0	0	0	0	0	0	0	0	0	0	0	0	3	0	4	0	3	1	0	1	0	1	0	0	0	0	1	4
ATGGTTGGTATGGAGC-1_1	0	2	3	4	5	5	6	7	6	7	7	9	9	9	11	10	12	10	12	12	13	14	14	15	13	14	13	15	15	14	15
ATGTCCCCAGATTAAG-1_1	0	0	0	0	0	0	0	0	0	0	0	0	0	0	6	2	6	1	6	1	4	6	6	7	3	6	5	5	3	3	6
ATGTCCCCATCCAATG-1_1	0	0	0	2	4	2	5	6	7	6	6	7	7	6	8	8	8	7	8	10	10	5	8	8	6	5	6	4	10	6	10
ATGTCCCGTAGTGCGA-1_1	0	0	0	2	2	2	2	2	2	1	1	1	1	12	9	2	10	13	10	11	12	11	11	12	11	11	10	12	11	10	11
ATGTCCCGTTCCCACT-1_1	0	1	1	1	1	1	1	1	1	4	4	4	4	2	5	6	4	6	5	4	6	4	4	4	4	3	3	3	8	9	3
ATGTCCCGTTGGGATG-1_1	0	0	0	0	0	0	0	0	0	0	0	0	0	0	6	2	6	1	6	1	4	6	6	7	3	6	5	5	3	3	6
ATGTCTTGTGTACATC-1_1	0	0	0	2	2	2	2	2	2	1	1	1	1	1	2	1	1	0	1	0	0	2	3	3	5	4	2	2	4	4	2
ATTACCTAGGTAGTCG-1_1	0	0	0	0	0	0	4	4	4	5	5	5	5	4	3	4	3	3	3	2	2	1	0	1	0	1	4	1	1	0	0
ATTACCTAGTGGCCTC-1_1	0	0	0	0	0	0	0	0	0	0	0	0	0	0	0	3	0	4	0	3	1	0	10	0	1	0	0	0	0	1	13
ATTACCTCAGACACAG-1_1	0	1	1	1	1	1	1	8	8	4	4	4	4	2	5	6	4	6	11	4	6	4	4	13	4	3	3	13	8	9	3
ATTACCTTCGCCACTT-1_1	0	0	0	0	0	0	0	0	0	0	0	0	0	6	7	7	7	7	7	6	5	5	5	5	6	5	6	4	5	5	5
ATTACTCAGCGATGGT-1_1	0	0	0	0	0	0	0	0	0	0	0	0	0	0	0	3	0	4	0	3	1	0	1	0	1	0	0	0	3	1	4
ATTACTCAGGGTTAGC-1_1	0	0	0	2	2	2	2	2	2	1	1	1	1	1	2	1	1	0	1	0	0	2	3	3	5	4	2	2	4	4	2
ATTATCCAGCAGATAT-1_1	0	0	0	0	0	0	0	0	0	0	0	0	0	0	6	2	6	1	6	1	4	6	6	7	3	6	5	5	3	3	6
ATTATCCAGGTCACTT-1_1	0	0	0	2	2	2	2	2	2	1	1	1	1	12	9	13	10	13	10	11	12	11	11	12	11	11	10	12	11	10	11
ATTATCCAGTGACCTT-1_1	0	2	3	4	5	5	6	7	6	7	7	10	10	11	13	11	15	14	14	15	15	16	16	16	16	15	14	16	17	15	18
ATTATCCAGTGCAGGT-1_1	0	2	3	4	5	5	6	7	6	7	7	9	9	9	11	10	12	10	12	12	13	14	14	15	13	14	13	15	15	14	15
ATTATCCCAACTCGAT-1_1	0	0	0	0	0	0	4	4	4	5	5	5	5	4	3	4	3	3	3	2	2	1	0	1	0	1	4	1	1	0	0
ATTATCCCAGTTAGGG-1_1	0	1	3	1	1	1	6	1	1	7	7	10	10	11	13	11	15	14	14	15	15	16	16	16	16	15	14	16	17	15	18
ATTCACTCAGCTGAGA-1_1	0	0	0	2	2	2	2	2	2	1	1	1	1	12	9	13	10	13	10	11	12	11	11	12	11	11	10	12	11	10	11
ATTCAGGAGCCGTTAT-1_1	0	0	2	3	3	3	3	3	3	2	2	2	2	5	4	5	5	5	4	5	3	3	2	2	2	2	1	9	2	2	1
ATTCAGGCAGTCGTTA-1_1	0	0	0	0	4	4	5	5	5	6	6	6	6	6	7	7	7	7	7	6	5	5	5	5	6	5	6	4	5	5	5
ATTCAGGGTCCACAGC-1_1	0	0	0	0	0	0	0	0	0	0	0	0	0	0	0	3	0	4	0	3	1	0	1	0	1	0	0	0	0	1	4
ATTCATCAGCGGTAAC-1_1	0	1	1	1	1	1	1	1	1	3	3	3	3	3	1	0	2	2	2	8	7	7	7	6	7	7	7	7	6	7	8
ATTCATCGTCTGCGCA-1_1	0	1	1	1	1	1	1	1	1	3	3	3	3	3	1	0	2	2	2	8	7	7	7	6	7	7	7	7	6	7	8
ATTCCATGTAAGTAGT-1_1	0	1	1	1	1	1	1	1	1	4	4	4	4	2	5	6	4	6	5	4	6	4	4	4	4	3	3	3	8	9	3
ATTCCATGTGCGGATA-1_1	0	5	6	7	8	8	9	11	11	11	11	12	12	14	15	15	17	16	18	19	19	20	20	20	20	20	20	20	21	21	22
ATTCCATTCGGTGCAC-1_1	0	0	0	0	0	0	4	4	4	5	5	5	5	4	3	4	3	3	3	2	2	1	0	1	0	1	4	1	1	0	0
ATTCCATTCTAGTGTG-1_1	0	0	0	2	2	2	2	2	2	1	1	1	1	1	2	1	1	0	1	0	0	2	3	3	5	4	2	2	4	4	2
ATTCCCGAGTTTCGGT-1_1	0	0	0	0	4	4	5	5	5	6	6	6	6	6	7	7	7	7	7	6	5	5	5	5	6	5	6	4	5	5	5
ATTCCCGGTCGCCACA-1_1	0	0	0	0	4	4	5	5	5	6	6	6	6	6	7	7	7	7	7	6	5	5	5	5	6	5	6	4	5	5	5
ATTCCCGGTGAGGAAA-1_1	0	0	0	0	0	0	0	0	0	0	0	0	0	0	6	2	6	1	6	1	4	6	6	7	3	6	5	5	3	3	6
ATTCCCGGTTAGGGAC-1_1	0	0	0	2	2	2	2	6	7	8	8	7	7	7	8	8	8	8	8	10	10	10	8	8	9	10	9	10	10	6	10
ATTCCCGTCCATCCGT-1_1	0	0	0	0	4	4	5	5	5	6	6	6	6	6	7	7	7	7	7	6	5	5	5	5	6	5	6	4	5	5	5
ATTCCCGTCTACTATC-1_1	0	0	0	2	2	2	2	2	2	1	1	1	1	12	9	13	10	13	10	11	12	11	11	12	11	11	10	12	11	10	11
ATTCCTATCAAAGCCT-1_1	0	0	0	0	0	0	0	0	0	0	0	0	0	0	0	2	0	1	9	9	11	9	10	9	10	9	16	11	9	17	7
ATTCCTATCGTTGTAG-1_1	0	1	1	1	1	1	4	4	4	5	5	5	5	4	3	4	3	3	3	2	9	1	4	4	0	1	3	3	12	11	14
ATTCGTTAGTGTTCAC-1_1	0	0	0	0	4	4	5	5	5	6	6	6	6	6	7	7	7	7	7	6	5	5	5	5	6	5	6	4	5	5	5
ATTCGTTGTGCAGTGA-1_1	0	0	0	2	2	2	2	2	2	1	1	1	1	12	9	13	10	13	10	11	12	11	11	12	11	11	10	12	11	10	11
ATTCGTTTCGGTCAGC-1_1	0	0	0	0	0	0	0	0	0	0	0	0	0	0	6	2	6	1	6	1	4	6	6	7	3	6	5	5	3	3	6
ATTCTACAGCGGCTCT-1_1	0	0	0	0	4	4	5	5	5	6	6	6	6	6	7	7	7	7	7	6	5	5	5	5	6	5	6	4	5	5	5
ATTCTACAGGACCCAA-1_1	0	0	0	0	4	4	5	5	5	6	6	6	6	6	7	7	7	7	7	6	5	5	5	5	6	5	6	4	5	5	5
ATTCTACGTGTTACAC-1_1	0	4	5	6	9	9	10	12	12	12	12	13	13	15	16	16	18	17	19	20	20	21	21	21	21	21	21	21	22	22	23
ATTCTACTCAAACGAA-1_1	0	0	0	0	2	2	0	6	0	8	0	0	7	7	8	8	9	8	9	9	11	9	8	8	10	9	9	11	9	6	7
ATTCTTGTCGAGCCTG-1_1	0	0	0	2	2	2	2	2	2	1	1	1	1	1	2	1	1	0	1	0	0	2	3	3	5	4	2	2	4	4	2
ATTCTTGTCTTGGAAC-1_1	0	0	0	2	2	2	2	2	2	1	1	1	1	1	2	1	1	0	1	0	0	2	3	3	5	4	2	2	4	4	2
ATTGGGTAGCATACTC-1_1	0	0	0	2	2	2	2	2	2	1	1	1	1	12	9	13	10	13	10	11	12	11	11	12	11	11	10	12	11	10	11
ATTGGGTGTTTCTATC-1_1	0	1	1	1	1	1	1	1	1	4	4	4	4	2	5	6	4	6	5	4	6	4	4	4	4	3	3	3	8	9	3
ATTGGGTTCAAGTAAG-1_1	0	0	0	0	0	0	0	0	0	0	0	0	0	0	0	2	0	1	0	1	4	0	1	9	3	9	5	0	3	3	7
ATTGTTCAGCCGATCC-1_1	0	0	0	0	2	2	0	6	0	8	0	0	7	7	8	8	9	8	9	9	11	9	8	8	10	9	9	11	9	6	7
ATTGTTCAGCGACCCT-1_1	0	0	0	2	2	2	2	2	2	1	1	1	1	1	2	1	1	0	1	0	0	2	3	3	5	4	2	2	4	4	2
ATTGTTCAGGACGCTA-1_1	0	4	5	6	7	7	8	10	10	10	10	11	11	13	14	14	16	15	16	17	17	18	18	18	18	18	18	18	19	19	20
ATTGTTCCAAGACCGA-1_1	0	4	5	6	7	7	8	10	10	10	10	11	11	13	14	14	16	15	16	17	17	18	18	18	18	18	18	18	19	19	20
ATTGTTCGTCGACTGC-1_1	0	0	0	0	0	0	0	0	0	0	0	0	0	0	0	3	0	4	0	3	1	0	10	0	1	0	0	0	0	1	13
ATTGTTCGTTAAACCC-1_1	0	1	1	1	1	1	1	1	1	3	3	3	3	3	1	0	2	2	2	8	7	7	7	6	7	7	7	7	6	7	8
ATTGTTCGTTAGGACG-1_1	0	0	0	0	0	0	0	0	0	0	0	0	0	0	6	2	6	1	6	1	4	6	6	7	3	6	5	5	3	3	6
ATTGTTCTCCTTTAGT-1_1	0	0	0	0	4	4	5	5	5	6	6	6	6	6	7	7	7	7	7	6	5	5	5	5	6	5	6	4	5	5	5
ATTGTTCTCGAGCCTG-1_1	0	0	0	0	0	0	0	0	0	0	0	0	0	0	6	2	6	1	6	1	4	6	6	7	3	6	5	5	3	3	6
ATTTACCAGCGCTTCG-1_1	0	0	0	0	4	4	5	5	5	6	6	6	6	6	7	7	7	7	7	6	5	5	5	5	6	5	6	4	5	5	5
ATTTACCGTAGACACG-1_1	0	0	0	0	4	4	5	5	5	6	6	6	6	6	7	7	7	7	7	6	5	5	5	5	6	5	6	4	5	5	5
ATTTCACCAACCGCCA-1_1	0	0	0	0	4	4	5	5	5	6	6	6	6	6	7	7	7	7	7	6	5	5	5	5	6	5	6	4	5	5	5
ATTTCACCAGCTTCGG-1_1	0	0	0	0	0	0	0	0	0	0	0	0	0	0	0	3	0	4	0	3	1	0	1	0	1	0	0	0	0	1	4
ATTTCACGTTGTAAAG-1_1	0	2	3	4	5	5	6	7	6	7	7	9	9	9	11	10	12	10	12	12	13	14	14	15	13	14	13	15	15	14	15
ATTTCTGGTCTAATCG-1_1	0	0	0	0	4	4	5	5	5	6	6	6	6	6	7	2	7	7	7	6	5	5	1	9	6	9	6	4	5	5	7
CAAAGAACACAATCTG-1_1	0	4	5	6	7	7	8	10	10	10	10	11	11	13	14	14	16	15	16	17	17	18	18	18	18	18	18	18	19	19	20
CAAAGAAGTACCATAC-1_1	0	0	0	0	0	0	0	0	0	0	0	0	0	0	0	2	0	1	0	1	4	0	1	9	3	0	5	0	3	3	7
CAAAGAAGTAGAGACC-1_1	0	0	0	0	0	0	0	0	0	0	0	0	0	0	0	2	0	1	0	1	4	0	1	9	3	9	5	0	3	3	7
CAAAGAAGTGGCTCTG-1_1	0	0	0	0	0	0	4	4	4	5	5	5	5	4	3	4	3	3	3	2	2	1	0	1	0	1	4	1	1	0	0
CAACAACGTCCAGCCA-1_1	0	0	0	2	2	2	2	2	2	1	1	1	1	1	2	1	1	0	1	0	0	2	3	3	5	4	2	2	4	4	2
CAACAACTCGCTAGCG-1_1	0	0	0	0	0	0	0	0	0	0	0	0	0	0	6	2	6	1	6	1	4	6	6	7	3	6	5	5	3	3	6
CAACAGTCAAGAATGT-1_1	0	0	0	2	2	2	2	2	2	1	1	1	1	1	2	1	1	0	1	0	0	2	3	3	5	4	2	2	4	4	2
CAACCTCAGGCACAAC-1_1	0	0	0	0	4	4	5	5	5	6	6	6	6	6	7	7	7	7	7	6	5	5	5	5	6	5	6	4	5	5	5
CAACCTCAGGGAGGTG-1_1	0	2	3	4	5	5	6	7	6	7	7	10	10	11	13	11	15	14	14	15	15	16	16	16	16	15	14	16	17	15	18
CAACCTCAGTTGTCAC-1_1	0	0	0	0	4	4	5	5	5	6	6	6	6	6	7	7	7	7	7	6	5	5	5	5	6	5	6	4	5	5	5
CAACCTCGTATTGCCA-1_1	0	0	0	0	0	0	4	4	4	5	5	5	5	4	3	4	3	3	3	2	2	1	0	1	0	1	4	1	1	0	0
CAACCTCGTTCTCTAT-1_1	0	0	0	0	4	4	5	5	5	6	6	6	6	6	7	7	7	7	7	6	5	5	5	5	6	5	6	4	5	5	5
CAACGATCAAGTTCGT-1_1	0	1	1	1	1	1	1	8	8	4	4	4	4	2	5	6	13	12	11	13	6	12	12	13	14	13	12	13	14	12	16
CAACGATCATGACAAA-1_1	0	1	1	1	1	1	1	8	8	4	4	4	4	2	5	6	4	6	11	4	6	4	4	13	4	13	12	13	8	9	3
CAACGATGTCATCCGG-1_1	0	0	0	2	2	2	2	2	2	1	1	1	1	1	2	1	1	0	1	0	0	13	13	11	12	12	11	14	13	13	12
CAACGGCGTACAGCGA-1_1	0	0	0	2	2	2	2	2	2	1	1	1	1	1	2	1	1	0	1	1	0	13	13	11	12	12	11	14	13	13	12
CAACGGCGTCCAAGAG-1_1	0	0	0	0	4	4	5	5	5	6	6	6	6	6	7	7	7	7	7	6	5	5	5	5	6	5	6	4	5	5	5
CAACGGCTCAATCAGC-1_1	0	1	3	1	1	1	6	1	1	7	7	10	10	11	13	11	15	14	14	15	15	16	16	16	16	15	14	16	17	15	18
CAAGACTAGTGATGGC-1_1	0	0	0	0	2	2	0	6	0	8	0	0	7	7	8	8	9	8	9	9	11	9	8	8	10	9	9	11	9	6	7
CAAGACTGTGGGCTTC-1_1	0	0	2	3	3	3	3	3	3	2	2	2	2	5	4	5	5	5	4	5	3	3	2	2	2	2	1	9	2	2	1
CAAGACTGTTATAGAG-1_1	0	0	2	3	3	3	3	3	3	2	2	2	2	5	4	5	5	5	4	5	3	3	2	2	2	2	1	6	2	2	1
CAAGAGGAGAGCTGAC-1_1	0	0	0	0	0	0	0	0	0	0	0	0	0	0	0	3	0	4	0	3	1	0	1	0	1	0	0	0	0	1	4
CAAGAGGAGCTGAAAT-1_1	0	0	0	0	4	4	5	5	5	6	6	6	6	6	7	7	7	7	7	6	5	5	5	5	6	5	6	4	5	5	5
CAAGAGGAGGCGTTGA-1_1	0	4	5	6	7	7	8	10	10	10	10	11	11	13	14	14	16	15	16	17	17	18	18	18	18	18	18	18	19	19	20
CAAGAGGTCGCCGAGT-1_1	0	0	0	2	2	2	2	6	7	8	8	7	7	7	8	8	8	8	8	10	10	10	8	8	9	10	9	10	10	6	10
CAAGAGGTCGGTGCAC-1_1	0	0	0	0	4	4	5	5	5	6	6	6	6	6	7	7	7	7	7	6	5	5	5	5	6	5	6	4	5	5	5
CAAGCTACATTGCCTC-1_1	0	0	0	2	2	2	2	2	2	1	1	1	1	1	9	1	10	0	10	11	12	11	11	12	11	11	10	12	11	10	11
CAAGCTAGTTGCATCA-1_1	0	0	0	0	4	4	5	5	5	6	6	6	6	6	7	7	7	7	7	6	5	5	5	5	6	5	6	4	5	5	5
CAAGGGAAGAGTCAGC-1_1	0	2	3	4	5	5	6	7	6	7	7	9	9	9	11	10	12	10	12	12	13	14	14	15	13	14	13	15	15	14	15
CAAGGGAAGGGCAATC-1_1	0	0	0	2	2	2	2	6	0	1	0	1	1	1	8	8	9	8	9	9	11	9	8	8	10	9	9	11	9	6	7
CAAGGGAAGGTAAGTT-1_1	0	1	1	1	1	1	1	8	8	4	4	4	4	2	5	6	13	12	11	13	6	12	12	13	14	13	12	13	14	12	16
CAATACGCAAGTGGGT-1_1	0	0	0	0	0	0	4	4	4	5	5	5	5	4	3	4	3	3	3	2	2	1	0	1	0	1	4	1	1	0	0
CAATACGCAGTCGCTG-1_1	0	0	0	1	1	1	1	1	1	3	3	3	3	3	1	0	2	2	2	7	8	8	9	6	8	8	8	8	7	8	14
CAATCGACAATGAACA-1_1	0	0	0	2	2	2	2	2	2	1	1	1	1	1	2	1	1	0	1	0	0	2	3	3	5	4	2	2	4	4	2
CAATCGACACAAAGCG-1_1	0	0	2	3	3	3	3	3	3	2	2	2	2	5	4	5	5	5	4	5	3	3	2	2	2	2	1	6	2	2	1
CAATCGAGTGAGAACC-1_1	0	0	0	2	2	2	2	2	2	1	1	1	1	12	9	13	10	13	10	11	12	11	11	12	11	11	10	12	11	10	11
CAATCGATCTGAGGTT-1_1	0	0	0	2	2	2	2	2	2	1	1	1	1	1	2	1	1	0	1	0	0	2	3	3	5	4	2	2	4	4	2
CAATGACAGATCCTAC-1_1	0	0	2	3	3	3	3	3	3	2	2	2	2	10	12	12	14	11	13	14	14	15	15	14	15	16	15	9	16	16	17
CAATGACAGTCCCAAT-1_1	0	0	0	2	2	2	2	2	2	1	1	1	1	1	2	1	1	0	1	0	0	2	3	3	5	4	2	2	4	4	2
CAATGACGTAATGATG-1_1	0	0	2	3	3	3	3	3	3	2	2	2	2	10	12	12	14	11	13	14	14	15	15	14	15	16	15	9	16	16	17
CAATGACTCCGATAGT-1_1	0	0	0	0	0	2	0	2	0	0	0	1	0	1	6	2	6	1	6	1	4	6	6	7	3	6	5	5	3	3	6
CAATTTCAGCTCTGTA-1_1	0	0	0	2	2	2	2	2	2	1	1	1	1	12	9	13	10	13	10	11	12	11	11	12	11	11	10	12	11	10	11
CAATTTCAGGCTCAAG-1_1	0	0	0	2	2	2	2	6	7	8	8	7	7	7	8	8	8	8	8	10	10	10	8	8	9	10	9	10	10	6	10
CAATTTCGTGGCATCC-1_1	0	0	0	0	0	0	4	4	4	5	5	5	5	4	3	4	3	3	3	2	2	1	0	1	0	1	4	1	1	0	0
CACAACACAGGATGAC-1_1	0	0	0	1	1	1	1	1	1	3	3	3	3	3	1	0	2	2	2	7	8	8	9	10	8	8	8	8	7	8	9
CACAACAGTGCACAAG-1_1	0	0	0	2	2	2	2	2	2	1	1	1	1	1	2	1	1	0	1	1	0	2	13	11	12	12	11	14	13	13	12
CACAACATCGCTGTCT-1_1	0	0	0	0	0	0	0	0	0	0	0	0	0	0	0	2	0	1	0	1	4	0	1	9	3	0	0	0	3	3	7
CACAACATCTACTGCC-1_1	0	0	0	0	0	0	0	0	0	0	0	0	0	0	6	2	6	1	6	1	4	6	6	7	3	6	5	5	3	3	6
CACACAAAGAGTGGCT-1_1	0	0	0	0	4	4	5	5	5	6	6	6	6	6	7	7	7	7	7	6	5	5	5	5	6	5	6	4	5	5	5
CACACAACAGGACTTT-1_1	0	2	3	4	5	5	6	7	6	7	7	9	9	9	11	10	12	10	12	12	13	14	14	15	13	14	13	15	15	14	15
CACACAACAGTAGAGC-1_1	0	0	0	0	0	0	4	4	4	5	5	5	5	4	3	4	3	3	3	2	2	1	0	1	0	1	4	1	1	0	0
CACACAACATAGAAAC-1_1	0	1	1	1	1	1	1	1	1	4	4	4	4	2	5	6	4	6	5	4	6	4	4	4	4	3	3	3	8	9	3
CACACAAGTCCAGCCA-1_1	0	0	0	0	4	4	5	5	5	6	6	6	6	6	7	7	7	7	7	6	5	5	5	5	6	5	6	4	5	5	5
CACACAATCGATTCCC-1_1	0	4	5	6	9	9	10	12	12	12	12	13	13	15	16	16	18	17	19	20	20	21	21	21	21	21	21	21	22	22	23
CACAGATAGTTTCGGT-1_1	0	0	0	0	0	0	0	0	0	0	0	0	0	0	6	2	6	1	6	1	4	6	6	7	3	6	5	5	3	3	6
CACAGATGTAACACCT-1_1	0	0	0	0	2	2	0	6	0	8	0	7	7	7	8	8	9	8	8	9	10	9	8	8	9	10	9	10	9	6	7
CACAGATGTAGAGACC-1_1	0	0	0	2	2	2	2	2	2	1	1	1	1	1	2	1	1	0	1	0	0	2	3	3	5	4	2	2	4	4	2
CACAGATGTTATGGTC-1_1	0	0	0	0	0	0	0	0	0	0	0	1	0	0	6	2	6	1	6	1	4	6	6	11	3	6	5	5	3	3	6
CACAGATTCTGGGTCG-1_1	0	0	0	0	4	4	5	5	5	6	6	6	6	6	7	7	7	7	7	6	5	5	5	5	6	5	6	4	5	5	5
CACAGATTCTTGTGCC-1_1	0	0	0	0	0	0	4	4	4	5	5	5	5	4	3	4	3	3	3	7	2	1	0	1	0	8	4	1	1	0	9
CACAGGCAGAGGACTC-1_1	0	1	1	1	1	1	1	8	8	4	4	4	4	2	5	6	13	12	11	13	6	12	12	13	14	13	12	13	14	12	16
CACAGGCCAAATCGTC-1_1	0	0	0	0	0	0	0	0	0	0	0	1	0	0	6	2	6	1	6	1	4	6	6	11	3	6	5	5	3	3	6
CACAGGCGTCGTAATC-1_1	0	0	0	0	0	0	0	0	0	0	0	0	0	0	0	3	0	4	0	3	1	0	1	0	1	0	0	0	0	1	4
CACAGGCTCCATCCGT-1_1	0	0	0	3	2	3	3	3	3	2	2	2	2	5	4	5	5	5	4	5	3	3	2	2	2	2	1	6	2	2	1
CACATGATCTTTGGAG-1_1	0	0	2	3	3	3	3	3	3	2	2	2	2	10	12	12	14	11	13	14	14	15	15	14	15	16	15	9	16	16	17
CACCAAAAGGTGCTGA-1_1	0	0	0	1	1	1	1	1	1	3	3	3	3	3	1	0	2	2	2	7	8	8	9	10	8	8	8	8	7	8	9
CACCAAACACGAGGTA-1_1	0	0	2	3	3	3	3	3	3	2	2	2	2	5	4	5	5	5	4	5	3	3	2	2	2	2	1	6	2	2	1
CACCAAAGTAGCGCCT-1_1	0	1	1	1	1	1	1	1	1	4	4	4	4	2	5	6	4	6	5	4	6	4	4	4	4	3	3	3	8	9	3
CACCAAAGTTGGGTAG-1_1	0	1	1	1	1	1	1	1	1	4	4	4	4	2	5	6	4	6	5	4	6	4	4	4	4	3	3	3	8	9	3
CACCGTTAGTACGAGC-1_1	0	0	0	0	0	0	4	4	4	5	5	5	5	4	3	4	3	3	3	2	2	1	0	1	0	1	4	1	1	0	0
CACCGTTGTGGCAGAT-1_1	0	0	0	2	2	2	2	2	2	1	1	1	1	1	2	1	1	0	1	0	0	2	3	3	5	4	2	2	4	4	2
CACCGTTTCATCGTAG-1_1	0	0	0	0	4	4	5	5	5	6	6	6	6	6	7	7	7	7	7	6	5	5	5	5	6	5	6	4	5	5	5
CACCGTTTCGCGAAGA-1_1	0	0	0	2	2	2	2	2	2	1	1	1	1	1	2	1	1	0	1	0	0	2	3	3	5	4	2	2	4	4	2
CACGAATGTTGGAGAC-1_1	0	0	0	2	2	2	2	2	2	1	1	1	1	1	2	1	1	0	1	0	0	2	3	3	5	4	2	2	4	4	2
CACGAATTCCCGTAAA-1_1	0	0	0	2	2	2	2	2	2	1	1	1	1	1	2	1	1	0	1	0	0	2	3	3	5	4	2	2	4	4	2
CACGGGTGTTATGGTC-1_1	0	3	4	5	6	6	7	9	9	9	9	8	8	8	10	9	11	9	15	16	16	17	17	17	17	17	17	17	18	18	19
CACGGGTGTTGGACCC-1_1	0	1	1	1	1	1	1	8	8	4	4	4	4	2	5	6	13	12	11	13	6	12	12	13	14	13	12	13	14	12	16
CACGGGTTCTGCTGAA-1_1	0	4	5	6	7	7	8	10	10	10	10	11	11	13	14	14	16	15	16	17	17	18	18	18	18	18	18	18	19	19	20
CACGTGGCAAATGGCG-1_1	0	0	0	0	0	0	4	4	4	5	5	5	5	4	3	4	3	3	3	2	2	1	0	1	0	1	4	1	1	0	0
CACGTTCAGAAGCGAA-1_1	0	0	0	0	0	0	0	0	0	0	0	0	0	0	0	3	0	4	0	3	1	0	10	0	1	0	0	0	0	1	13
CACGTTCAGATAGCAT-1_1	0	0	0	0	0	0	0	0	0	0	0	0	0	0	6	2	6	1	6	1	4	6	6	11	3	6	5	5	3	3	6
CACGTTCCAATCTGCA-1_1	0	0	0	0	0	0	4	4	4	5	5	5	5	0	3	3	3	3	3	2	2	0	0	0	0	1	4	0	0	0	13
CACGTTCGTCCTGTTC-1_1	0	0	0	0	2	2	2	2	2	1	1	1	1	1	6	2	6	1	6	1	4	13	13	11	12	12	11	14	13	13	12
CACGTTCTCCGCTAGG-1_1	0	0	0	0	0	0	0	0	0	0	0	0	0	0	6	2	6	1	6	1	4	6	6	7	3	6	5	5	3	3	6
CACGTTCTCCTTGACC-1_1	0	0	0	2	2	2	2	6	7	8	8	7	7	7	8	8	8	8	8	10	10	10	8	8	9	10	9	10	10	6	10
CACTAAGAGTAGTCCT-1_1	0	2	3	4	5	5	6	7	6	7	7	9	9	9	11	10	12	10	12	12	13	14	14	15	13	14	13	15	15	14	15
CACTAAGAGTTGTCAC-1_1	0	0	0	0	0	0	0	0	0	0	0	0	0	0	0	3	0	4	0	3	1	0	10	0	1	0	0	0	0	1	13
CACTAAGCAACAAAGT-1_1	0	0	0	0	0	0	0	0	0	0	0	0	0	0	0	2	0	1	0	1	1	0	1	9	3	8	5	0	7	3	4
CACTAAGGTCCGAAGA-1_1	0	1	1	1	1	1	1	1	1	3	3	3	3	3	1	0	2	2	2	8	7	7	7	6	7	7	7	7	6	7	8
CACTAAGGTCCGGACT-1_1	0	0	2	3	3	3	3	3	3	2	2	2	2	5	4	5	5	5	4	5	3	3	2	2	2	2	1	9	2	2	1
CACTAAGGTTGCGGAA-1_1	0	4	5	6	7	7	8	10	10	10	10	11	11	13	14	14	16	15	16	17	17	18	18	18	18	18	18	18	19	19	20
CACTAAGTCTGCATGA-1_1	0	0	0	2	4	4	5	5	7	6	6	7	7	6	8	8	7	7	8	10	10	5	8	5	6	5	6	4	10	5	10
CACTAAGTCTGCCCTA-1_1	0	3	4	5	6	6	7	9	9	9	9	8	8	8	10	9	11	9	15	16	16	17	17	17	17	17	17	17	18	18	19
CACTGAAAGAAGGGAT-1_1	0	0	0	0	0	0	0	0	0	0	0	0	0	0	6	2	6	1	6	1	4	6	6	7	3	6	5	5	3	3	6
CACTGAAAGCATGCAG-1_1	0	0	0	0	0	0	0	0	0	0	0	0	0	0	6	2	6	1	6	1	4	6	6	7	3	6	5	5	3	3	6
CACTGAAAGTTCTACG-1_1	0	0	0	2	2	2	2	2	2	1	1	1	1	1	2	1	1	0	1	0	0	13	13	11	12	12	11	14	13	13	12
CACTGAATCAAGAAAC-1_1	0	0	0	2	2	2	2	2	2	1	1	1	1	1	2	1	1	0	1	0	0	2	3	3	5	4	2	2	4	4	2
CACTGGGAGCCTCATA-1_1	0	0	0	0	0	0	0	0	0	0	0	0	0	0	6	2	6	1	6	1	4	6	6	7	3	6	5	5	3	3	6
CACTGTCCAATGGCAG-1_1	0	2	3	4	5	5	6	7	6	7	7	9	9	9	11	10	12	10	12	12	13	14	14	15	13	14	13	15	15	14	15
CACTGTCCACTTGACA-1_1	0	0	0	1	1	1	1	1	1	3	3	3	3	3	1	0	2	2	2	7	8	8	9	10	8	8	8	8	7	8	9
CACTGTCTCCATCACC-1_1	0	0	0	0	0	0	0	0	0	0	0	0	0	0	0	3	0	4	0	3	1	0	10	0	1	0	0	0	0	1	13
CACTGTCTCTCTTGCG-1_1	0	0	0	0	4	4	5	5	5	6	6	6	6	6	7	7	7	7	7	6	5	5	5	5	6	5	6	4	5	5	5
CACTTCGCACTTCCTG-1_1	0	0	0	0	0	0	0	0	0	0	3	3	0	0	1	0	2	2	2	7	8	8	9	10	8	8	8	8	7	8	9
CACTTCGGTAGTTACC-1_1	0	1	1	1	1	1	1	1	1	4	4	4	4	2	1	0	4	6	5	4	9	4	4	4	4	3	3	3	12	11	14
CAGAGCCAGGGTCTTT-1_1	0	0	0	2	2	2	2	6	2	1	1	1	1	1	8	8	8	0	1	0	0	13	8	8	9	12	11	10	13	6	12
CAGAGCCCACCGTGAC-1_1	0	0	0	0	0	0	0	0	0	0	0	0	0	0	6	2	6	1	6	1	4	6	6	7	3	6	5	5	3	3	6
CAGAGCCCAGAGTCTT-1_1	0	0	0	0	4	4	5	5	5	6	6	6	6	6	7	7	7	7	7	6	5	5	5	5	6	5	6	4	5	5	5
CAGAGCCTCACTGATG-1_1	0	2	3	4	5	5	6	7	6	7	7	9	9	9	11	10	12	10	12	12	13	14	14	15	13	14	13	15	15	14	15
CAGAGCCTCGTCCATC-1_1	0	2	3	4	5	5	6	7	6	7	7	10	10	11	13	11	15	14	14	15	15	16	16	16	16	15	14	16	17	15	18
CAGATACAGTCATAGA-1_1	0	0	0	2	2	2	2	2	2	1	1	1	1	1	2	1	1	0	1	1	0	13	13	11	12	12	11	14	13	13	12
CAGATACAGTGCCTCG-1_1	0	0	0	0	4	4	5	5	5	6	6	6	6	6	7	7	7	7	7	6	5	5	5	5	6	5	6	4	5	5	5
CAGATACCAATAACCC-1_1	0	2	3	4	5	5	6	7	6	7	7	10	10	11	13	11	15	14	14	15	15	16	16	16	16	15	14	16	17	15	18
CAGATACCAATCCTAG-1_1	0	0	0	2	2	2	2	2	2	1	1	1	1	12	9	13	10	13	10	11	12	11	11	12	11	11	10	12	11	10	11
CAGATACCAGATTCGT-1_1	0	0	0	0	0	0	0	0	0	0	0	0	0	0	0	3	0	4	0	3	1	0	1	0	1	0	0	0	0	1	4
CAGATACCATCGGCCA-1_1	0	1	1	1	1	1	1	8	8	4	4	4	4	2	5	6	13	12	11	13	6	12	12	13	14	13	12	13	14	12	16
CAGATACTCACCGCTT-1_1	0	0	0	2	2	2	2	2	2	1	1	1	1	1	2	1	1	0	1	0	0	2	3	3	5	4	2	2	4	4	2
CAGATACTCCTTCTAA-1_1	0	1	1	1	1	1	1	1	1	4	4	4	4	2	5	6	4	6	5	4	9	4	4	4	4	3	3	3	8	9	3
CAGATCAAGTTCATGC-1_1	0	0	0	0	0	0	0	0	4	5	5	0	5	0	0	3	0	4	3	2	1	0	0	1	0	0	0	1	0	1	0
CAGATTGAGCACCAGA-1_1	0	0	0	2	2	2	2	2	2	1	1	1	1	1	2	1	1	0	1	1	0	13	13	11	12	12	11	14	13	13	12
CAGCAATAGATGGGCT-1_1	0	0	0	2	2	2	2	2	2	1	1	1	1	12	9	13	10	13	10	11	12	11	11	12	11	11	10	12	11	10	11
CAGCAATAGTATTGCC-1_1	0	0	0	0	0	0	0	0	0	0	0	0	0	0	0	3	0	4	0	3	1	0	1	0	1	0	0	0	0	1	4
CAGCAATCACGACGAA-1_1	0	1	1	1	1	1	1	1	1	4	4	4	4	2	5	6	4	6	5	4	9	4	4	4	4	3	3	3	8	9	3
CAGCAATCAGGATCTT-1_1	0	0	0	2	2	2	2	2	2	1	1	1	1	1	2	1	1	0	1	1	0	13	13	11	12	12	11	14	13	13	12
CAGCAATGTCCAACGC-1_1	0	4	5	6	9	9	10	12	12	12	12	13	13	15	16	16	18	17	19	20	20	21	21	21	21	21	21	21	22	22	23
CAGCAATGTGTAACGG-1_1	0	2	3	4	5	5	6	7	6	7	7	9	9	9	11	10	12	10	12	12	13	14	14	15	13	14	13	15	15	14	15
CAGCACGGTAATGCTC-1_1	0	0	0	2	2	2	2	2	2	1	1	1	1	1	2	1	1	0	1	0	0	2	3	3	5	4	2	2	4	4	2
CAGCACGTCAACACGT-1_1	0	1	1	1	1	1	1	1	1	4	4	4	4	2	1	0	4	6	5	4	9	4	4	4	4	3	3	3	12	11	14
CAGCACGTCCAGTTCC-1_1	0	0	0	2	2	2	2	2	2	1	1	1	1	1	2	1	1	0	1	0	0	2	3	3	5	4	2	2	4	4	2
CAGCAGCAGAGCTGCA-1_1	0	0	0	0	0	0	0	0	0	0	0	1	0	0	6	2	6	1	6	1	4	6	6	11	3	6	5	5	3	3	6
CAGCAGCCACGTACTA-1_1	0	0	0	0	0	0	0	0	0	0	0	0	0	0	6	2	6	1	6	1	4	6	6	7	3	6	5	5	3	3	6
CAGCAGCGTTCCGCGA-1_1	0	1	1	1	1	1	1	8	8	4	4	4	4	2	5	6	4	6	11	4	6	12	12	13	4	13	12	13	14	12	3
CAGCAGCTCAGCTGTA-1_1	0	0	0	0	0	0	4	4	4	5	5	5	5	4	3	4	3	3	3	2	2	1	0	1	0	1	4	1	1	0	0
CAGCAGCTCTCTGCTG-1_1	0	1	1	1	1	1	1	1	1	3	3	3	3	3	1	0	2	2	2	8	7	7	7	6	7	7	7	7	6	7	8
CAGCCAGAGTAGTCAA-1_1	0	1	1	1	1	1	1	1	1	4	4	4	4	2	5	6	4	6	5	4	6	4	4	4	4	3	3	3	8	9	3
CAGCCAGCAAGGTACG-1_1	0	5	6	7	8	8	9	11	11	11	11	12	12	14	15	15	17	16	18	19	19	20	20	20	20	20	20	20	21	21	22
CAGCCAGCAGACATCT-1_1	0	1	1	1	1	1	1	1	1	4	4	4	4	2	5	6	4	6	5	4	6	4	4	4	4	3	3	3	8	9	3
CAGCCAGCATAAGCAA-1_1	0	3	4	5	6	6	7	9	9	9	9	8	8	8	10	9	11	9	17	18	18	19	19	19	19	19	19	19	20	20	21
CAGCCAGGTCCATACA-1_1	0	0	0	0	0	0	4	4	4	5	5	5	5	4	3	4	3	3	3	2	2	1	0	1	0	1	4	1	1	0	0
CAGCCAGGTGATATAG-1_1	0	0	0	2	2	2	2	2	2	1	1	1	1	1	2	1	1	0	1	0	0	2	3	3	5	4	2	2	4	4	2
CAGCCAGTCCATGATG-1_1	0	0	2	3	3	3	3	3	3	2	2	2	2	10	12	12	14	11	13	14	14	15	15	14	15	16	15	9	16	16	17
CAGCCAGTCGTCTCAC-1_1	0	1	1	1	1	1	1	1	1	3	3	3	3	3	1	0	2	2	2	8	7	7	7	6	7	7	7	7	6	7	8
CAGCGTGAGGCCTTCG-1_1	0	0	0	0	0	0	4	4	4	5	5	5	5	4	3	4	3	3	3	2	2	1	0	1	0	1	4	1	1	0	0
CAGCGTGAGGGTCAAC-1_1	0	0	2	3	3	3	3	3	3	2	2	2	2	5	6	5	6	5	6	1	4	6	6	14	2	6	1	9	2	2	6
CAGCGTGGTTGTGTTG-1_1	0	0	0	0	0	0	0	0	0	0	0	0	0	0	0	3	0	4	0	3	1	0	10	0	1	0	0	0	0	1	13
CAGGCCAAGCCGATAG-1_1	0	0	0	0	0	0	0	0	0	0	0	0	0	0	0	3	0	4	0	3	1	0	1	0	1	0	0	0	0	1	4
CAGGCCACACCGTCGA-1_1	0	0	0	2	2	2	2	6	7	8	8	7	7	7	8	8	8	8	8	10	10	10	8	8	9	10	9	10	10	6	10
CAGGTATAGAGATTCA-1_1	0	0	0	0	4	4	5	5	5	6	6	6	6	6	7	7	7	7	7	6	5	5	5	5	6	5	6	4	5	5	5
CAGGTATAGCACTGGA-1_1	0	0	2	3	3	3	3	3	3	2	2	2	2	5	4	5	5	5	4	5	3	3	2	2	2	2	1	9	2	2	1
CAGGTATAGTATCTGC-1_1	0	1	1	1	1	1	1	1	1	3	3	3	3	3	1	0	2	2	2	8	7	7	7	6	7	7	7	7	6	7	8
CAGGTATCAACAGATA-1_1	0	0	0	0	4	4	5	5	5	6	6	6	6	6	7	7	7	7	7	6	5	5	5	5	6	5	6	4	5	5	5
CAGGTATGTATATGGA-1_1	0	4	5	6	7	7	8	10	10	10	10	11	11	13	14	14	16	15	16	17	17	18	18	18	18	18	18	18	19	19	20
CAGTGCGCAAGAATGT-1_1	0	2	3	4	5	5	6	7	6	7	7	9	9	9	11	10	12	10	12	12	13	14	14	15	13	14	13	15	15	14	15
CAGTGCGTCCTACACC-1_1	0	0	2	3	3	3	3	3	3	2	2	2	2	5	4	5	5	5	4	5	3	3	2	2	2	2	1	6	2	2	1
CAGTTAGCATTCAGCA-1_1	0	0	0	0	4	4	5	5	5	6	6	6	6	6	7	7	7	7	7	6	5	5	5	5	6	5	6	4	5	5	5
CAGTTAGGTAAGACCG-1_1	0	1	1	1	1	1	1	1	1	4	4	4	4	2	5	6	4	6	5	4	6	4	4	4	4	3	3	3	8	9	3
CAGTTAGGTTATAGCC-1_1	0	1	1	1	1	1	1	8	8	4	4	4	4	2	5	6	4	6	11	4	6	12	12	13	4	13	12	13	14	12	3
CAGTTCCAGAGGATCC-1_1	0	0	0	0	4	4	5	5	5	6	6	6	6	6	7	7	7	7	7	6	5	5	5	5	6	5	6	4	5	5	5
CAGTTCCAGCGCTGAA-1_1	0	0	0	2	2	2	2	2	2	1	1	1	1	1	2	1	1	0	1	0	0	2	3	3	5	4	2	2	4	4	2
CAGTTCCAGCTAGAGC-1_1	0	0	0	0	0	0	0	0	0	0	0	0	0	0	6	2	6	1	6	1	4	6	6	7	3	6	5	5	3	3	6
CAGTTCCGTACCTTCC-1_1	0	0	0	0	0	0	0	0	0	0	0	0	0	0	6	2	6	1	6	1	4	6	6	7	3	6	5	5	3	3	6
CATAAGCAGGCTAGCA-1_1	0	0	0	2	2	2	2	2	2	1	1	1	1	1	2	1	1	0	1	0	0	2	3	3	5	4	2	2	4	4	2
CATAAGCGTGTAGTGG-1_1	0	0	0	0	0	0	0	0	0	0	0	0	0	0	6	2	6	1	6	1	4	6	6	7	3	6	5	5	3	3	6
CATAAGCTCCACTGGG-1_1	0	0	0	0	0	0	0	0	0	0	0	0	0	0	0	3	0	4	0	3	1	0	1	0	1	0	0	0	0	1	4
CATAAGCTCGTGGGTC-1_1	0	0	0	2	2	2	2	6	7	8	8	7	7	7	8	8	8	8	8	10	10	10	8	8	9	10	9	10	10	6	10
CATACAGAGTCTGCGC-1_1	0	0	0	0	0	0	0	0	0	0	0	0	0	0	0	2	9	1	9	9	11	9	10	9	10	9	16	11	9	17	7
CATACAGCAACCTATG-1_1	0	0	0	0	2	2	0	6	0	8	0	7	7	7	8	8	9	8	8	9	10	9	8	8	9	10	9	10	9	6	7
CATACAGCAGCAGTAG-1_1	0	3	4	5	6	6	7	9	9	9	9	8	8	8	10	9	11	9	17	18	18	19	19	19	19	19	19	19	20	20	21
CATACCCAGCAATTCC-1_1	0	0	0	2	2	2	2	2	2	1	1	0	1	1	2	1	1	0	1	0	0	2	3	3	5	4	2	2	4	4	2
CATACCCCACGACTAT-1_1	0	0	0	2	2	2	2	6	5	6	6	6	7	6	8	8	8	0	7	0	5	5	8	8	9	12	6	10	13	6	12
CATACCCGTCAAAGAT-1_1	0	0	0	0	0	0	0	0	0	0	0	0	0	0	0	3	0	4	0	3	1	0	10	0	1	0	0	0	0	1	13
CATACCCTCACTTCTA-1_1	0	0	2	3	3	3	3	3	3	2	2	2	2	5	4	5	5	5	4	5	3	3	2	2	2	2	1	6	2	2	1
CATACCCTCTACACAG-1_1	0	0	0	0	0	0	0	0	0	0	0	0	0	0	0	2	0	1	0	1	4	0	1	9	3	6	5	0	3	3	6
CATACTTAGCATTGTC-1_1	0	0	0	2	2	2	2	2	2	1	1	1	1	1	2	1	1	0	1	0	0	2	3	3	5	4	2	2	4	4	2
CATACTTAGTCTCTGA-1_1	0	0	0	0	4	4	5	5	5	6	6	6	6	6	7	7	7	7	7	6	5	5	5	5	6	5	6	4	5	5	5
CATACTTCAAGATCCT-1_1	0	1	1	1	1	1	1	8	8	4	4	4	4	2	5	6	13	12	11	13	6	12	12	13	14	13	12	13	14	12	16
CATACTTCACAGAGCA-1_1	0	0	0	0	4	4	5	5	5	6	6	6	6	6	7	7	7	7	7	6	5	5	5	5	6	5	6	4	5	5	5
CATACTTCATACCAGT-1_1	0	1	1	1	1	1	1	1	1	4	4	4	4	2	5	6	4	6	5	4	6	4	4	4	4	3	3	3	8	9	3
CATACTTTCGTTGCCT-1_1	0	0	0	0	4	4	5	5	5	6	6	6	6	6	7	7	7	7	7	6	5	5	5	5	6	5	6	4	5	5	5
CATAGACAGTTGGACG-1_1	0	0	0	0	0	0	0	0	0	0	0	0	0	0	6	2	6	1	6	1	4	6	6	7	3	6	5	5	3	3	6
CATAGACCAGGATGAC-1_1	0	0	0	2	2	2	2	2	2	1	1	1	1	1	9	1	10	0	10	11	12	11	11	12	11	11	10	12	11	10	11
CATAGACGTACGTGAG-1_1	0	1	1	1	1	1	1	1	1	3	3	3	3	3	1	0	2	2	2	8	7	7	7	6	7	7	7	7	6	7	8
CATAGACGTCGTTGGC-1_1	0	0	0	0	0	0	0	0	0	0	0	0	0	0	0	3	0	4	0	3	1	0	1	0	1	0	0	0	0	1	4
CATCAAGGTTTCACAG-1_1	0	0	0	0	0	0	0	0	0	0	0	0	0	0	0	2	0	1	0	1	4	0	1	0	3	6	5	0	3	3	4
CATCAAGTCTTGCGCT-1_1	0	0	0	0	4	4	5	5	5	6	6	6	6	6	7	7	7	7	7	6	5	5	5	5	6	5	6	4	5	5	5
CATCCACCATCTTCGC-1_1	0	0	0	2	2	2	2	2	2	1	1	1	1	12	9	13	10	13	10	11	12	11	11	12	11	11	10	12	11	10	11
CATCCACGTCAGCTTA-1_1	0	0	0	2	2	2	2	2	2	1	1	1	1	12	9	13	10	13	10	11	12	11	11	12	11	11	10	12	11	10	11
CATCCACTCCCTCAAC-1_1	0	2	3	4	5	5	6	7	6	7	7	9	9	9	11	10	12	10	12	12	13	14	14	15	13	14	13	15	15	14	15
CATCCACTCCGCTTAC-1_1	0	0	0	2	2	2	2	2	2	1	1	1	1	1	2	1	1	0	1	0	0	2	3	3	5	4	2	2	4	4	2
CATCCACTCGCACTCT-1_1	0	0	2	3	3	3	3	3	3	2	2	2	2	10	12	12	14	11	13	14	14	15	15	14	15	16	15	9	16	16	17
CATCCACTCGGCTGTG-1_1	0	0	2	3	3	3	3	3	3	2	2	2	2	5	4	5	5	5	4	5	3	3	2	2	2	2	1	6	2	2	1
CATCCCAAGCCTGAAG-1_1	0	0	0	2	2	2	2	2	2	1	1	1	1	1	2	1	1	0	1	0	0	2	3	3	5	4	2	2	4	4	2
CATCCCAAGCTTTCCC-1_1	0	0	0	2	2	2	2	2	2	1	1	1	1	1	2	1	1	0	1	1	0	2	13	11	12	12	11	14	13	13	12
CATCCCAAGTGTAGAT-1_1	0	1	1	1	1	1	1	8	8	4	4	4	4	2	5	6	13	12	11	13	6	12	12	13	14	13	12	13	14	12	16
CATCCCATCACCCTCA-1_1	0	0	2	3	3	3	3	3	3	2	2	2	2	5	4	5	5	5	4	5	3	3	2	2	2	2	1	6	2	2	1
CATCCGTCACGATAGG-1_1	0	0	2	3	3	3	3	3	3	2	2	2	2	5	4	5	5	5	4	5	3	3	2	2	2	2	1	6	2	2	1
CATCCGTGTAACTTCG-1_1	0	1	1	1	1	1	1	8	8	4	4	4	4	2	5	6	13	12	11	13	6	12	12	13	14	13	12	13	14	12	16
CATCCGTGTTGAGAGC-1_1	0	1	1	1	1	1	1	8	8	4	4	4	4	2	5	6	4	6	11	4	6	12	12	13	4	13	12	13	14	12	3
CATCCGTTCACCTTGC-1_1	0	0	0	0	0	0	4	4	4	5	5	5	5	0	3	3	3	3	3	2	2	0	0	0	0	1	4	0	0	0	13
CATCCGTTCCTACGAA-1_1	0	0	0	2	2	2	2	2	2	1	1	1	1	12	9	13	10	13	10	11	12	11	11	12	11	11	10	12	11	10	11
CATCGCTGTTTGCAGT-1_1	0	0	0	0	0	0	0	0	0	0	1	1	0	0	6	2	6	1	6	1	4	8	9	10	3	8	5	5	3	3	9
CATCGCTTCTATACTC-1_1	0	4	5	6	9	9	10	12	12	12	12	13	13	15	16	16	18	17	19	20	20	21	21	21	21	21	21	21	22	22	23
CATCGGGCAAGTTCGT-1_1	0	1	1	1	1	1	1	8	8	4	4	4	4	2	5	6	13	12	11	13	6	12	12	13	14	13	12	13	14	12	16
CATCGTCAGTGATCGG-1_1	0	3	4	5	6	6	7	9	9	9	9	8	8	8	10	9	11	9	17	18	18	19	19	19	19	19	19	19	20	20	21
CATCGTCCACTGTCGG-1_1	0	0	2	3	3	3	3	3	3	2	2	2	2	5	4	5	5	5	4	5	3	3	2	2	2	2	1	6	2	2	1
CATGAGTAGGACAGTC-1_1	0	1	3	1	1	1	6	1	1	7	7	10	10	11	13	11	15	14	14	15	15	16	16	16	16	15	14	16	17	15	18
CATGAGTAGGCCTAAG-1_1	0	0	0	2	2	2	2	2	2	1	1	1	1	1	2	1	1	0	1	0	0	2	3	3	5	4	2	2	4	4	2
CATGAGTCATAGTCGT-1_1	0	0	0	1	1	1	1	1	1	3	3	3	3	3	1	0	2	2	2	7	8	8	9	10	8	8	8	8	7	8	9
CATGAGTCATCGGTTA-1_1	0	0	0	0	0	0	4	4	4	5	5	5	5	4	3	4	3	3	3	2	2	1	0	1	0	1	4	1	1	0	0
CATGAGTTCCTTCGAC-1_1	0	0	0	0	0	0	0	0	0	0	0	0	0	0	0	2	0	1	0	1	4	0	1	9	3	0	0	0	3	3	7
CATGCAAAGCCGAATG-1_1	0	0	2	3	3	3	3	3	3	2	2	2	2	5	4	5	5	5	4	5	3	3	2	2	2	2	1	6	2	2	1
CATGCAACACTGGACC-1_1	0	5	6	7	8	8	9	11	11	11	11	12	12	14	15	15	17	16	18	19	19	20	20	20	20	20	20	20	21	21	22
CATGCAATCGGCTTGG-1_1	0	0	0	2	2	2	2	2	2	1	1	1	1	12	9	13	10	13	10	11	12	11	11	12	11	11	10	12	11	10	11
CATGCCTGTGTCATCA-1_1	0	0	0	0	4	4	5	5	5	6	6	6	6	6	7	7	7	7	7	6	5	5	5	5	6	5	6	4	5	5	5
CATGCCTTCTGGTGCG-1_1	0	0	0	0	0	0	0	0	0	0	0	0	0	0	0	3	0	4	0	3	1	0	1	0	1	0	0	0	0	1	4
CATGCGGAGCGATGAC-1_1	0	4	5	6	9	9	10	12	12	12	12	13	13	15	16	16	18	17	19	20	20	21	21	21	21	21	21	21	22	22	23
CATGCGGCAATCGCAT-1_1	0	2	3	4	5	5	6	7	6	7	7	9	9	9	11	10	12	10	12	12	13	14	14	15	13	14	13	15	15	14	15
CATGCGGCACAGTGAG-1_1	0	1	5	1	1	7	8	10	10	10	10	11	11	13	14	14	16	15	16	17	17	18	18	18	18	18	18	18	19	24	25
CATGCTCGTCCAGCAC-1_1	0	0	0	0	0	0	0	0	0	0	0	0	0	0	6	2	6	1	6	1	4	6	6	7	3	6	5	5	3	3	6
CATGCTCTCAGCTTCC-1_1	0	4	5	6	7	7	8	10	10	10	10	11	11	13	14	14	16	15	16	17	17	18	18	18	18	18	18	18	19	19	20
CATGGATCATAATGAG-1_1	0	0	2	3	3	3	3	3	3	2	2	2	2	5	4	5	5	5	4	5	3	3	2	2	2	2	1	6	2	2	1
CATGGATGTATCTCTT-1_1	0	4	5	6	7	7	8	10	10	10	10	11	11	13	14	14	16	15	16	17	17	18	18	18	18	18	18	18	19	19	20
CATGGTACACACGGTC-1_1	0	2	3	4	5	5	6	7	6	7	7	9	9	9	11	10	12	10	12	12	13	14	14	15	13	14	13	15	15	14	15
CATGGTACATTGGATC-1_1	0	0	0	0	0	0	0	0	0	0	0	0	0	0	0	3	0	4	0	3	1	0	5	0	1	0	0	0	0	1	13
CATGGTAGTCAAAGTA-1_1	0	4	5	6	7	7	8	10	10	10	10	11	11	13	14	14	16	15	16	17	17	18	18	18	18	18	18	18	19	19	20
CATGGTAGTTGAGAGC-1_1	0	0	0	0	4	4	5	5	5	6	6	6	6	6	7	7	7	7	7	6	5	5	5	5	6	5	6	4	5	5	5
CATGGTATCTGTCAGA-1_1	0	0	0	0	0	0	0	0	0	0	0	0	0	0	6	2	6	1	6	1	4	6	6	7	3	6	5	5	3	3	6
CATTCATTCCCTTGTG-1_1	0	0	0	0	0	0	0	0	0	0	0	0	0	0	6	2	6	1	6	1	4	6	6	11	3	6	5	5	3	3	7
CATTCCGAGCCTAACT-1_1	0	0	0	2	2	2	2	2	2	1	1	1	1	1	2	1	1	0	1	0	0	2	3	3	5	4	2	2	4	4	2
CATTCCGCACGAGGAT-1_1	0	4	5	6	7	7	8	10	10	10	10	11	11	13	14	14	16	15	16	17	17	18	18	18	18	18	18	18	19	19	20
CATTCCGTCATGGATC-1_1	0	0	0	0	4	4	5	5	5	6	6	6	6	6	7	7	7	7	7	6	5	5	5	5	6	5	6	4	5	5	5
CATTCCGTCCATCAGA-1_1	0	4	5	6	9	9	10	12	12	12	12	13	13	15	16	16	18	17	19	20	20	21	21	21	21	21	21	21	22	22	23
CATTCTATCTAACGGT-1_1	0	2	3	4	5	5	6	7	6	7	7	9	9	9	11	10	12	10	12	12	13	14	14	15	13	14	13	15	15	14	15
CATTCTATCTGGTGGC-1_1	0	0	0	0	0	0	0	0	0	0	0	0	0	0	0	3	0	4	0	3	1	0	1	0	1	0	0	0	0	1	4
CATTGAGCAGCGCGTT-1_1	0	1	1	1	1	1	1	1	1	3	3	3	3	3	1	0	2	2	2	8	7	7	7	6	7	7	7	7	6	7	8
CATTGAGCAGTTGTTG-1_1	0	0	0	1	1	1	1	1	1	3	3	3	3	3	1	0	2	2	2	7	8	8	9	10	8	8	8	8	7	8	9
CATTGAGTCCCTTCCC-1_1	0	0	0	2	2	2	2	2	2	1	1	1	1	1	2	1	1	0	1	0	0	2	3	3	5	4	2	2	4	4	2
CATTGAGTCTCGCGTT-1_1	0	2	3	4	5	5	6	7	6	7	7	9	9	9	11	10	12	10	12	12	13	14	14	15	13	14	13	15	15	14	15
CATTGCCCAGCGTATT-1_1	0	1	1	1	1	1	1	1	1	3	3	3	3	3	1	0	2	2	2	8	7	7	7	6	7	7	7	7	6	7	8
CATTGCCGTCCAAGAG-1_1	0	1	1	1	1	1	1	1	1	4	4	4	4	2	5	6	4	6	5	4	6	4	4	4	4	3	3	3	8	9	3
CATTGCCGTTGTTGTG-1_1	0	1	1	1	1	1	1	1	1	4	4	4	4	2	5	6	4	6	5	4	9	4	4	4	4	3	3	3	8	9	3
CATTGCCTCCGTAGTA-1_1	0	4	5	6	7	7	8	10	10	10	10	11	11	13	14	14	16	15	16	17	17	18	18	18	18	18	18	18	19	19	20
CATTGCCTCTAGCATG-1_1	0	2	3	4	5	5	6	7	6	7	7	9	9	9	11	10	12	10	12	12	13	14	14	15	13	14	13	15	15	14	15
CATTGTTTCGGTCTAA-1_1	0	1	1	1	1	1	1	1	1	3	3	3	3	3	1	0	2	2	2	8	7	7	7	6	7	7	7	7	6	7	8
CATTTCAAGAACAAGG-1_1	0	0	0	1	1	1	1	1	1	3	3	3	3	3	1	0	2	2	2	7	8	8	9	10	8	8	8	8	7	8	9
CATTTCACAAAGAGTT-1_1	0	1	1	1	1	1	1	1	1	4	4	4	4	2	5	6	4	6	5	4	9	4	4	4	4	3	3	3	8	9	3
CATTTCACACTTTATC-1_1	0	0	2	3	3	3	3	3	3	2	2	2	2	5	4	5	5	5	4	5	3	3	2	2	2	2	1	9	2	2	1
CATTTCAGTTAACAGA-1_1	0	0	0	2	2	2	2	6	7	8	8	7	7	7	8	8	8	8	8	10	10	10	8	8	9	10	9	10	10	6	10
CCAAGCGCAGATCACT-1_1	0	0	0	0	2	2	0	6	0	8	0	0	7	7	8	8	9	8	9	9	11	9	8	8	10	9	9	11	9	6	7
CCAAGCGGTACGAGTG-1_1	0	0	0	0	2	2	0	2	0	1	0	0	1	12	9	13	10	13	10	11	12	11	11	12	11	11	10	12	11	10	11
CCAAGCGGTCCGAAAG-1_1	0	0	0	2	2	2	2	2	2	1	1	1	1	12	9	13	10	13	10	11	12	11	11	12	11	11	10	12	11	10	11
CCAAGCGTCAGTGGGA-1_1	0	0	0	0	4	4	5	5	5	6	6	6	6	6	7	7	7	7	7	6	5	5	5	5	6	5	6	4	5	5	5
CCAAGCGTCCTTCGAC-1_1	0	0	0	0	0	0	4	4	4	5	5	5	5	4	3	4	3	3	3	2	2	1	0	1	0	1	4	1	1	0	0
CCAATGAAGCTCCCTT-1_1	0	0	0	0	0	0	0	0	0	0	0	0	0	0	0	2	9	1	9	9	11	9	10	9	10	9	16	11	9	17	7
CCAATTTGTAGACGGT-1_1	0	0	0	0	0	0	0	0	0	6	0	6	0	0	0	2	0	1	0	1	4	0	5	9	3	9	5	0	3	3	7
CCAATTTGTCGCTTAA-1_1	0	0	0	0	4	4	5	5	5	6	6	6	6	6	7	7	7	7	7	6	5	5	5	5	6	5	6	4	5	5	5
CCACAAACATCCTGTC-1_1	0	0	0	2	2	2	2	2	2	1	1	1	1	1	2	1	1	0	1	0	0	2	3	3	5	4	2	2	4	4	2
CCACAAAGTAAGCTCT-1_1	0	0	0	2	2	2	2	6	7	8	8	7	7	7	8	8	8	8	8	10	10	10	8	8	9	10	9	10	10	6	10
CCACAAAGTAGCGTAG-1_1	0	0	0	1	1	1	1	1	1	3	3	3	3	3	1	0	2	2	2	7	8	8	9	6	8	8	8	8	7	8	14
CCACAAATCACGGACC-1_1	0	0	0	0	4	4	5	5	5	6	6	6	6	6	7	7	7	7	7	6	5	5	5	5	6	5	6	4	5	5	5
CCACAAATCATTCTTG-1_1	0	4	5	6	9	9	10	12	12	12	12	13	13	15	16	16	18	17	19	20	20	21	21	21	21	21	21	21	22	22	23
CCACAAATCATTGTGG-1_1	0	1	1	1	1	1	1	1	1	3	3	3	3	3	1	0	2	2	2	8	7	7	7	6	7	7	7	7	6	7	8
CCACACTCACAGCGCT-1_1	0	4	5	6	7	7	8	10	10	10	10	11	11	13	14	14	16	15	16	17	17	18	18	18	18	18	18	18	19	19	20
CCACACTCACGTAGAG-1_1	0	0	0	0	4	4	5	5	5	6	6	6	6	6	7	7	7	7	7	6	5	5	5	5	6	5	6	4	5	5	5
CCACACTTCATGGTAC-1_1	0	0	0	0	0	0	0	0	0	0	0	0	0	0	0	3	0	4	0	3	1	0	1	9	1	0	0	0	0	1	4
CCACACTTCCTACAAG-1_1	0	0	0	2	2	2	2	2	2	1	1	1	1	1	2	1	1	0	1	0	0	2	3	3	5	4	2	2	4	4	2
CCACACTTCCTCTTTC-1_1	0	0	0	2	2	2	2	2	2	1	1	1	1	1	2	1	1	0	1	0	0	13	13	11	12	12	11	14	13	13	12
CCACCATAGAGTATAC-1_1	0	0	2	3	3	3	3	3	3	2	2	2	2	5	4	5	5	5	4	5	3	3	2	2	2	2	1	9	2	2	1
CCACCATAGATACAGT-1_1	0	3	4	5	6	6	7	9	9	9	9	8	8	8	10	9	11	9	15	16	16	17	17	17	17	17	17	17	18	18	19
CCACCATAGTACGAGC-1_1	0	0	0	1	1	1	1	1	1	3	3	3	3	3	1	0	2	2	2	7	8	8	9	10	8	8	8	8	7	8	9
CCACCATTCACAACCA-1_1	0	0	0	2	2	2	2	2	2	1	1	1	1	1	2	1	1	0	1	0	0	2	3	3	5	4	2	2	4	4	2
CCACGAGAGCTACTAC-1_1	0	4	5	6	7	7	8	10	10	10	10	11	11	13	14	14	16	15	16	17	17	18	18	18	18	18	18	18	19	19	20
CCACGAGAGGCTTAAA-1_1	0	0	0	2	2	2	2	2	2	1	1	1	1	1	2	1	1	0	1	0	0	2	3	3	5	4	2	2	4	4	2
CCACGAGTCAGCTAGT-1_1	0	0	2	3	3	3	3	3	3	2	2	2	2	5	4	5	5	5	4	5	3	3	2	2	2	2	1	6	2	2	1
CCACGAGTCTTCACGC-1_1	0	1	1	1	1	1	1	1	1	4	4	4	4	2	5	6	4	6	5	4	6	4	4	4	4	3	3	3	8	9	3
CCACGTTAGGTCTGGA-1_1	0	2	3	4	5	5	6	7	6	7	7	9	9	9	11	10	12	10	12	12	13	14	14	15	13	14	13	15	15	14	15
CCACGTTTCGATACAC-1_1	0	0	0	2	2	2	2	2	2	1	1	1	1	1	9	1	10	0	10	11	12	11	11	12	11	11	10	12	11	10	11
CCACGTTTCTCCTGTG-1_1	0	4	5	6	7	7	8	10	10	10	10	11	11	13	14	14	16	15	16	17	17	18	18	18	18	18	18	18	19	19	20
CCACTTGAGCCTGACC-1_1	0	0	2	3	3	3	3	3	3	2	2	2	2	5	6	5	6	5	6	1	4	6	6	14	3	6	1	9	3	2	6
CCACTTGCAGTACTAC-1_1	0	2	3	4	5	5	6	7	6	7	7	9	9	9	11	10	12	10	12	12	13	14	14	15	13	14	13	15	15	14	15
CCACTTGGTGTCACAT-1_1	0	0	0	0	0	0	0	0	0	0	0	0	0	0	0	2	0	1	0	1	1	0	1	9	3	0	0	0	3	3	7
CCATAAGCAGAACTAA-1_1	0	0	0	0	0	0	0	0	0	0	0	0	0	0	0	3	0	4	0	3	1	0	10	0	1	0	0	0	0	1	13
CCATCACCACTGCTTC-1_1	0	0	0	0	0	0	0	0	0	0	0	0	0	6	6	2	6	1	6	1	4	6	6	7	3	6	5	5	3	3	6
CCATCACGTATGGTTC-1_1	0	0	0	0	0	0	4	4	4	5	5	5	5	4	3	4	3	3	3	2	2	1	0	1	0	1	4	1	1	0	0
CCCAACTAGCTCCCTT-1_1	0	0	0	0	0	0	0	0	0	0	0	0	0	0	0	2	0	1	0	1	4	0	1	9	3	0	0	0	3	3	7
CCCATTGAGCAAATCA-1_1	0	0	0	0	0	0	0	0	0	0	0	0	0	0	0	2	0	1	0	1	1	0	1	9	3	0	0	0	3	3	7
CCCATTGGTATTTCGG-1_1	0	1	1	1	1	1	1	1	1	3	3	3	3	3	1	0	2	2	2	8	7	7	7	6	7	7	7	7	6	7	8
CCCATTGGTTTCCATT-1_1	0	0	0	0	0	0	4	4	4	5	5	5	5	0	3	3	3	3	3	2	2	0	0	0	0	1	4	0	0	0	13
CCCATTGTCTTACTGT-1_1	0	3	4	5	6	6	7	9	9	9	9	8	8	8	10	9	11	9	15	16	16	17	17	17	17	17	17	17	18	18	19
CCCGAAGCAACCGCTG-1_1	0	1	1	1	1	1	1	8	8	4	4	4	4	2	5	6	13	12	11	13	6	12	12	13	14	13	12	13	14	12	16
CCCGAAGGTTTGGGAG-1_1	0	0	0	0	0	0	0	0	0	0	0	0	0	0	6	2	6	1	6	1	4	6	6	7	3	6	5	5	3	3	6
CCCGAAGTCCCGATCT-1_1	0	0	0	0	0	0	4	4	4	5	5	5	5	4	3	4	3	3	3	2	2	1	0	1	0	1	4	1	1	0	0
CCCGGAAGTCGCAGTC-1_1	0	0	0	2	2	2	2	2	2	1	1	1	1	12	9	13	10	13	10	11	12	11	11	12	11	11	10	12	11	10	11
CCCTAACCATAGCTGT-1_1	0	0	0	0	0	0	0	2	0	0	1	0	0	0	9	2	10	13	10	11	12	11	11	12	11	11	10	12	11	10	11
CCCTAACGTCATAGTC-1_1	0	0	2	3	3	3	3	3	3	2	2	2	2	5	4	5	5	5	4	5	3	3	2	2	2	2	1	6	2	2	1
CCCTAACTCGCTTTAT-1_1	0	0	0	2	2	2	2	6	7	8	8	7	7	7	8	8	8	8	8	10	10	10	8	8	9	10	9	10	10	6	10
CCCTCAAAGAGCATAT-1_1	0	0	0	0	0	0	4	4	4	5	5	5	5	4	3	4	3	3	3	2	2	1	0	1	0	1	4	1	1	0	0
CCCTCAAAGCACCGAA-1_1	0	4	5	6	9	9	10	12	12	12	12	13	13	15	16	16	18	17	19	20	20	21	21	21	21	21	21	21	22	22	23
CCCTCAAGTATCAAGA-1_1	0	0	0	2	2	2	2	6	7	8	8	7	7	7	8	8	8	8	8	10	10	10	8	8	9	10	9	10	10	6	10
CCCTCTCCAGACCATT-1_1	0	2	3	4	5	5	6	7	6	7	7	9	9	9	11	10	12	10	12	12	13	14	14	15	13	14	13	15	15	14	15
CCCTGATCAGGGTTGA-1_1	0	0	0	0	0	0	0	0	4	0	0	0	0	0	0	3	0	4	0	3	1	0	1	0	1	0	0	0	0	1	4
CCCTGATCATCCTTGC-1_1	0	0	0	0	0	0	4	4	4	5	5	5	5	4	3	4	3	3	3	2	2	1	0	1	0	1	4	1	1	0	0
CCCTGATCATTGGATC-1_1	0	2	3	4	5	5	6	7	6	7	7	9	9	9	11	10	12	10	12	12	13	14	14	15	13	14	13	15	15	14	15
CCCTGATTCCACCTGT-1_1	0	0	0	2	2	2	2	2	2	1	1	1	1	1	2	1	1	0	1	0	0	2	3	3	5	4	2	2	4	4	2
CCCTGATTCGCACGGT-1_1	0	0	0	0	0	0	0	0	0	0	0	0	0	0	6	2	6	1	0	1	4	6	1	7	3	6	5	5	3	3	6
CCCTTAGCAAGTCGTT-1_1	0	0	0	2	2	2	2	6	5	6	6	6	7	6	8	8	8	0	7	0	5	5	8	8	9	12	6	10	13	6	12
CCCTTAGGTAGCTGTT-1_1	0	0	0	0	0	0	0	0	0	0	0	0	0	0	0	2	0	1	0	1	4	0	1	9	3	0	0	0	3	3	7
CCCTTAGGTAGTGGCA-1_1	0	1	1	1	1	1	1	1	1	4	4	4	4	2	5	6	4	6	5	4	6	4	4	4	4	3	3	3	8	9	3
CCCTTAGGTGATACCT-1_1	0	1	1	1	1	1	1	8	8	4	4	4	4	2	5	6	4	6	11	4	6	12	12	13	4	13	12	13	14	12	3
CCGAACGAGCCTCTGG-1_1	0	2	3	4	5	5	6	7	6	7	7	9	9	9	11	10	12	10	12	12	13	14	14	15	13	14	13	15	15	14	15
CCGATCTGTCCACTCT-1_1	0	0	0	0	0	0	4	4	4	5	5	5	5	4	3	4	3	3	3	2	2	1	0	1	0	1	4	1	1	0	0
CCGATCTTCTCCATAT-1_1	0	3	4	5	6	6	7	9	9	9	9	8	8	8	10	9	11	9	17	18	18	19	19	19	19	19	19	19	20	20	21
CCGATGGAGTTGTCGT-1_1	0	1	1	1	1	1	1	1	1	4	4	4	4	2	1	0	4	6	5	4	9	4	4	4	4	3	3	3	12	11	14
CCGATGGCATCGAACT-1_1	0	0	0	0	0	0	4	4	4	5	5	5	5	4	3	4	3	3	3	2	2	1	0	1	0	1	4	1	1	0	0
CCGATGGTCCAAACCA-1_1	0	0	0	0	0	0	4	4	4	5	5	5	5	4	3	4	3	3	3	2	2	1	0	1	0	1	4	1	1	0	0
CCGATGGTCGCCGATG-1_1	0	0	2	3	3	3	3	3	3	2	2	2	2	5	4	5	5	5	4	5	3	3	2	2	2	2	1	6	2	2	1
CCGCAAGCACAAATGA-1_1	0	1	1	1	1	1	1	1	1	4	4	3	4	3	1	0	4	6	5	4	9	4	4	4	4	3	3	3	6	11	3
CCGCAAGGTTGCTCGG-1_1	0	0	0	0	4	4	5	5	5	6	6	6	6	6	7	7	7	7	7	6	5	5	5	5	6	5	6	4	5	5	5
CCGCAAGTCGAGGCAA-1_1	0	0	0	0	0	0	0	0	0	0	0	0	0	0	0	3	0	4	0	3	1	0	1	0	1	0	0	0	0	1	4
CCGCAAGTCGATACTG-1_1	0	1	1	1	1	1	1	1	1	4	4	4	4	2	5	6	4	6	5	4	9	4	4	4	4	3	3	3	8	9	3
CCGCAAGTCGCCAACG-1_1	0	0	0	0	0	0	4	4	4	5	5	5	5	4	3	4	3	3	3	2	2	1	0	1	0	1	4	1	1	0	0
CCGGACAAGTGCTCGC-1_1	0	0	0	0	0	0	0	0	0	0	0	0	0	0	0	3	0	4	0	3	1	0	1	9	1	0	0	0	0	1	4
CCGGGTACAAGCGAGT-1_1	0	2	3	4	5	5	6	7	6	7	7	9	9	9	11	10	12	10	12	12	13	14	14	15	13	14	13	15	15	14	15
CCGGGTACAGGCGATA-1_1	0	0	0	0	0	0	4	4	4	5	5	5	5	4	3	4	3	3	3	2	2	1	0	1	0	1	4	1	1	0	0
CCGGGTAGTTAGGCTT-1_1	0	0	0	2	2	2	2	2	2	1	1	1	1	1	2	1	1	0	1	0	0	2	3	3	5	4	2	2	4	4	2
CCGGGTAGTTCATCTT-1_1	0	1	1	1	1	1	1	1	1	3	3	3	3	3	1	0	2	2	2	8	7	7	7	6	7	7	7	7	6	7	8
CCGGGTATCTCCTGTG-1_1	0	0	0	0	0	0	0	0	0	0	0	0	2	5	6	2	6	1	6	1	4	6	6	7	3	6	5	5	3	3	6
CCGGTAGCAATACGAA-1_1	0	0	0	2	2	2	2	2	2	1	1	1	1	1	2	1	1	0	1	0	0	2	3	3	5	4	2	2	4	4	2
CCGGTAGTCCATCACC-1_1	0	0	0	2	2	2	2	2	2	1	1	1	1	1	2	1	1	0	1	0	0	2	3	3	5	4	2	2	4	4	2
CCGGTGAGTCTACGTA-1_1	0	0	2	3	3	3	3	3	3	2	2	2	2	5	4	5	5	5	4	5	3	3	2	2	2	2	1	9	2	2	1
CCGGTGAGTCTGCAAT-1_1	0	0	0	0	0	0	0	0	4	0	0	0	5	0	0	3	0	4	0	3	1	0	0	0	1	0	0	0	0	1	4
CCGGTGAGTGACCGAA-1_1	0	0	2	3	3	3	3	3	3	2	2	2	2	5	4	5	5	5	4	5	3	3	2	2	2	2	1	6	2	2	1
CCGGTGATCGGTCTAA-1_1	0	2	3	4	5	5	6	7	6	7	7	9	9	9	11	10	12	10	12	12	13	14	14	15	13	14	13	15	15	14	15
CCGTAGGAGATGCTAA-1_1	0	0	0	2	2	2	2	2	2	1	1	1	1	1	2	1	1	0	1	0	0	2	3	3	5	4	2	2	4	4	2
CCGTAGGGTAGGTCAG-1_1	0	0	0	0	0	0	4	4	4	5	5	5	5	4	3	4	3	3	3	2	2	1	0	1	0	1	4	1	1	0	0
CCGTAGGTCCTACCAC-1_1	0	1	1	1	1	1	1	8	8	4	4	4	4	2	5	6	4	6	11	4	6	12	12	13	4	13	12	13	14	12	3
CCGTGAGCATCGATAC-1_1	0	1	1	1	1	1	1	1	1	4	4	4	4	2	5	6	4	6	5	4	6	4	4	4	4	3	3	3	8	9	3
CCGTGAGTCACTAGCA-1_1	0	0	0	0	0	0	0	0	0	0	0	0	0	0	6	2	6	1	6	1	4	6	6	7	3	6	5	5	3	3	6
CCGTTCAAGATAGTGT-1_1	0	0	0	0	4	4	5	5	5	6	6	6	6	6	7	7	7	7	7	6	5	5	5	5	6	5	6	4	5	5	5
CCTAACCCATCATCTT-1_1	0	0	2	3	3	3	3	3	3	2	2	2	2	5	4	5	5	5	4	5	3	3	2	2	2	2	1	9	2	2	1
CCTAACCGTCGCAGTC-1_1	0	0	0	0	0	0	0	0	0	0	0	0	0	0	6	2	6	1	6	1	4	6	6	7	3	6	5	5	3	3	6
CCTAAGAAGGTTCTTG-1_1	0	2	3	4	5	5	6	7	6	7	7	9	9	9	11	10	12	10	12	12	13	14	14	15	13	14	13	15	15	14	15
CCTAAGACATAATCGC-1_1	0	2	3	4	5	5	6	7	6	7	7	9	9	9	11	10	12	10	12	12	13	14	14	15	13	14	13	15	15	14	15
CCTAAGATCAACACCA-1_1	0	0	2	3	3	3	3	3	3	2	2	2	2	5	4	5	5	5	4	5	3	3	2	2	2	2	1	6	2	2	1
CCTAAGATCGGTCGGT-1_1	0	0	0	0	0	0	4	4	4	5	5	5	5	4	3	4	3	3	3	2	2	1	4	1	0	1	3	1	1	0	14
CCTACGTCACGCAGTC-1_1	0	0	0	0	0	0	4	4	4	5	5	5	5	4	3	4	3	3	3	2	2	1	0	1	0	1	4	1	1	0	14
CCTACGTCAGTCAGAG-1_1	0	0	2	3	3	3	3	3	3	2	2	2	2	5	4	5	5	5	4	5	3	3	2	2	2	2	1	9	2	2	1
CCTACGTTCCTAACAG-1_1	0	0	0	0	0	0	4	4	4	5	5	5	5	4	3	4	3	3	3	2	2	1	0	1	0	1	4	1	1	0	0
CCTATCGCAGCTGTGC-1_1	0	0	2	3	3	3	3	3	3	2	2	2	2	5	4	5	5	5	4	5	3	3	2	2	2	2	1	6	2	2	1
CCTATCGGTGTTTGCA-1_1	0	2	3	4	5	5	6	7	6	7	7	9	9	9	11	10	12	10	12	12	13	14	14	15	13	14	13	15	15	14	15
CCTATCGTCCTTCTAA-1_1	0	2	3	4	5	5	6	7	6	7	7	9	9	9	11	10	12	10	12	12	13	14	14	15	13	14	13	15	15	14	15
CCTATCGTCGTTGTGA-1_1	0	0	0	2	2	2	2	6	2	1	1	1	1	1	2	8	8	0	1	0	0	13	8	8	9	12	11	10	13	6	12
CCTCAACCATGTGCCG-1_1	0	0	0	2	2	2	2	2	2	1	1	1	1	1	2	1	1	0	1	0	0	2	3	3	5	4	2	2	4	4	2
CCTCAACTCAGACCTA-1_1	0	2	3	4	5	5	6	7	6	7	7	9	9	9	11	10	12	10	12	12	13	14	14	15	13	14	13	15	15	14	15
CCTCAACTCAGCGCAC-1_1	0	0	0	0	0	0	0	0	0	0	0	0	0	0	0	2	0	1	0	1	4	0	1	9	3	9	5	0	3	3	7
CCTCACAAGCACGTCC-1_1	0	0	0	1	1	1	1	1	1	3	3	3	3	3	1	0	2	2	2	7	8	8	9	10	8	8	8	8	7	8	9
CCTCACATCATAGACC-1_1	0	1	1	1	1	1	1	1	1	3	3	3	3	3	1	0	2	2	2	8	7	7	7	6	7	7	7	7	6	7	8
CCTCAGTAGAGGTATT-1_1	0	0	0	0	0	0	4	4	4	5	5	5	5	4	3	4	3	3	3	2	2	1	0	1	0	1	4	1	1	0	0
CCTCAGTAGCGTTGTT-1_1	0	0	0	0	0	0	0	0	0	0	0	1	0	0	6	2	6	1	6	1	4	6	6	11	3	6	5	5	3	3	6
CCTCAGTAGTAAGGGA-1_1	0	1	1	1	1	1	1	1	1	4	4	4	4	2	5	6	4	6	5	4	6	4	4	4	4	3	3	3	8	9	3
CCTCAGTGTGAGTTGG-1_1	0	0	0	0	0	0	0	0	0	0	0	0	0	0	0	3	0	4	0	3	1	0	1	0	1	0	0	0	0	1	4
CCTCAGTTCAAGTAAG-1_1	0	1	1	1	1	1	1	1	1	4	4	4	4	2	1	0	4	6	5	4	9	4	4	4	4	3	3	3	12	11	3
CCTCATGCAGCCTTCT-1_1	0	1	1	1	1	1	1	8	8	4	4	4	4	2	5	6	13	12	11	13	6	12	12	13	14	13	12	13	14	12	16
CCTCATGCATACAGAA-1_1	0	2	3	4	5	5	6	7	6	7	7	9	9	9	11	10	12	10	12	12	13	14	14	15	13	14	13	15	15	14	15
CCTCATGGTACCTTCC-1_1	0	0	0	0	0	0	0	0	0	0	0	1	0	0	6	2	6	1	6	1	4	6	6	11	3	6	5	5	3	3	6
CCTCATGTCAGGTAAA-1_1	0	0	0	0	0	0	4	4	4	5	5	5	5	4	3	4	3	3	3	2	2	1	0	1	0	11	16	1	1	0	11
CCTCCAACAGAGACTG-1_1	0	0	2	3	3	3	3	3	3	2	2	2	2	10	12	12	14	11	13	14	14	15	15	14	15	16	15	9	16	16	17
CCTCCAAGTTTAGAGA-1_1	0	0	0	2	2	2	2	6	7	8	8	7	7	7	8	8	8	8	8	10	10	10	8	8	9	10	9	10	10	6	10
CCTCCTCAGAGTTGTA-1_1	0	1	1	1	1	1	1	1	1	4	4	4	4	2	5	6	4	6	5	4	6	4	4	4	4	3	3	3	8	9	3
CCTCCTCCAACTCCAA-1_1	0	0	0	2	2	2	2	2	2	1	1	1	1	1	2	1	1	0	1	0	0	2	3	3	5	4	2	2	4	4	2
CCTCCTCCATAGGCGA-1_1	0	1	1	1	1	1	1	1	1	4	4	4	4	2	5	6	4	6	5	4	9	4	4	4	4	3	3	3	8	9	3
CCTCCTCGTCACTAGT-1_1	0	1	2	3	1	1	1	3	3	3	3	2	3	10	12	12	14	11	13	14	7	15	15	14	15	16	15	7	16	16	17
CCTCCTCTCGTTAGAC-1_1	0	3	4	5	6	6	7	9	9	9	9	8	8	8	10	9	11	9	15	16	16	17	17	17	17	17	17	17	18	18	19
CCTCTAGAGAGTTGAT-1_1	0	0	2	3	3	3	3	3	3	2	2	2	2	5	4	5	5	5	4	5	3	3	2	2	2	2	1	6	2	2	1
CCTCTAGCACCGCTAG-1_1	0	0	0	0	0	0	4	4	4	5	5	5	5	4	3	4	3	3	3	2	2	1	0	1	0	1	4	1	1	0	0
CCTCTAGCACTGTGTA-1_1	0	0	0	0	0	0	0	0	0	0	0	0	0	0	0	3	0	4	0	3	1	0	1	0	1	0	0	0	0	1	4
CCTCTAGCAGAGACTG-1_1	0	0	0	0	0	0	4	4	4	5	5	5	5	4	3	4	3	3	3	2	2	1	0	1	0	1	4	1	1	0	0
CCTCTCCAGAATCGCG-1_1	0	0	0	0	0	0	4	4	4	5	5	5	5	4	3	4	3	3	3	2	2	1	0	1	0	1	4	1	1	0	0
CCTCTCCCAGGTTACT-1_1	0	0	0	2	2	2	2	2	2	1	1	1	1	1	2	1	1	0	1	0	0	2	3	3	5	4	2	2	4	4	2
CCTCTCCGTAGTTCCA-1_1	0	0	0	2	2	2	2	2	2	1	1	1	1	12	9	13	10	13	10	11	12	11	11	12	11	11	10	12	11	10	11
CCTGCATAGGTACAAT-1_1	0	0	0	0	0	0	0	1	1	3	3	3	3	3	1	0	2	2	2	7	8	8	9	10	8	8	8	8	7	8	9
CCTGCATGTATGCTAC-1_1	0	4	5	6	9	9	10	12	12	12	12	13	13	15	16	16	18	17	19	20	20	21	21	21	21	21	21	21	22	22	23
CCTGTTGGTAGGCTGA-1_1	0	0	0	2	2	2	2	2	2	1	1	1	1	1	2	1	1	0	1	0	0	2	3	3	5	4	2	2	4	4	2
CCTGTTGGTATTGACC-1_1	0	0	0	2	2	2	2	2	2	1	1	1	1	1	1	1	2	0	2	7	8	8	9	10	8	8	8	8	7	8	9
CCTGTTGTCCGATGTA-1_1	0	3	4	5	6	6	7	9	9	9	9	8	8	8	10	9	11	9	15	16	16	17	17	17	17	17	17	17	18	18	19
CCTTCAGCAAGCGCTC-1_1	0	2	3	4	5	5	6	7	6	7	7	9	9	9	11	10	12	10	12	12	13	14	14	15	13	14	13	15	15	14	15
CCTTCAGCACGTAGAG-1_1	0	0	0	2	2	2	2	6	7	8	8	7	7	7	8	8	8	8	8	10	10	10	8	8	9	10	9	10	10	6	10
CCTTCAGCATGCACTA-1_1	0	0	0	0	0	0	0	0	0	0	0	0	0	0	0	2	0	1	0	1	0	0	1	9	3	0	0	0	3	3	7
CCTTCAGGTCATGGCC-1_1	0	1	1	1	1	1	1	1	1	3	3	3	3	3	1	0	2	2	2	8	7	7	7	6	7	7	7	7	6	7	8
CCTTCAGTCCACTTTA-1_1	0	0	2	3	3	3	3	3	3	2	2	2	2	5	4	5	5	5	4	5	3	3	2	2	2	2	1	6	2	2	1
CCTTGTGAGAGGCGTT-1_1	0	0	0	0	0	0	0	0	0	0	0	0	0	0	0	3	0	4	0	3	1	0	10	0	1	0	0	0	0	1	13
CCTTGTGGTTACACAC-1_1	0	2	3	4	5	5	6	7	6	7	7	10	10	11	13	11	15	14	14	15	15	16	16	16	16	15	14	16	17	15	18
CCTTTGGAGATGGCAC-1_1	0	0	0	0	0	0	0	0	0	0	0	0	0	0	6	2	6	1	6	1	4	6	6	7	3	6	5	5	3	3	6
CCTTTGGAGGGCAATC-1_1	0	2	3	4	5	5	6	7	6	7	7	9	9	9	11	10	12	10	12	12	13	14	14	15	13	14	13	15	15	14	15
CCTTTGGCACAACATC-1_1	0	0	0	0	4	4	5	5	5	6	6	6	6	6	7	7	7	7	7	6	5	5	5	5	6	5	6	4	5	5	5
CCTTTGGCACATTCGA-1_1	0	0	0	0	0	0	0	0	0	0	0	0	0	0	6	2	6	1	6	1	4	6	6	7	3	6	5	5	3	3	6
CCTTTGGCACCAGTTA-1_1	0	1	1	1	1	1	1	8	8	4	4	4	4	2	5	6	4	6	11	4	6	12	12	13	4	13	12	13	14	12	3
CGAAGGAAGAGGGCGA-1_1	0	2	3	4	5	5	6	7	6	7	7	9	9	9	11	10	12	10	12	12	13	14	14	15	13	14	13	15	15	14	15
CGAAGGAAGAGTTCGG-1_1	0	0	0	2	2	2	2	6	7	8	8	7	7	7	8	8	8	8	8	10	10	10	8	8	9	10	9	10	10	6	10
CGAAGGAGTTCTCCAC-1_1	0	0	0	0	0	0	0	0	0	0	0	1	0	0	6	2	6	1	6	1	4	6	6	11	3	6	5	5	3	3	6
CGAAGGAGTTGACTGT-1_1	0	0	2	3	3	3	3	3	3	2	2	2	2	5	4	5	5	5	4	5	3	3	2	2	2	2	1	9	2	2	1
CGAAGGATCTGGCCGA-1_1	0	0	0	2	2	2	2	2	2	1	1	1	1	1	2	1	1	0	1	1	0	2	13	11	12	12	11	14	13	13	12
CGAAGTTAGTTCCGTA-1_1	0	0	0	0	4	4	5	5	5	6	6	6	6	6	7	7	7	7	7	6	5	5	5	5	6	5	6	4	5	5	5
CGAAGTTCAATGTCTG-1_1	0	2	3	4	5	5	6	7	6	7	7	9	9	9	11	10	12	10	12	12	13	14	14	15	13	14	13	15	15	14	15
CGAATTGAGATCCAAA-1_1	0	0	0	0	0	0	0	0	0	0	0	1	0	0	6	2	6	1	6	1	4	6	6	11	3	6	5	5	3	3	6
CGAATTGAGTATGAGT-1_1	0	0	0	0	0	0	0	0	0	0	0	0	0	0	6	2	6	1	6	1	4	6	6	7	3	6	5	5	3	3	6
CGAATTGCAGATTTCG-1_1	0	1	1	1	1	1	1	1	1	3	3	3	3	3	1	0	2	2	2	8	7	7	7	6	7	7	7	7	6	7	8
CGACAGCCATGATAGA-1_1	0	0	2	3	3	3	3	3	3	2	2	2	2	5	6	5	6	5	6	1	4	6	6	14	2	6	1	9	2	2	6
CGAGAAGAGATACAGT-1_1	0	0	0	0	0	0	0	0	0	0	0	0	0	0	0	3	0	4	0	3	1	0	10	0	1	0	0	0	0	1	13
CGAGAAGAGTCGCTAT-1_1	0	2	3	4	5	5	6	7	6	7	7	9	9	9	11	10	12	10	12	12	13	14	14	15	13	14	13	15	15	14	15
CGAGAAGTCTAGTGTG-1_1	0	1	1	1	1	1	1	8	8	4	4	4	4	2	5	6	13	12	11	13	6	12	12	13	14	13	12	13	14	12	16
CGAGGAACACAGAGAC-1_1	0	0	0	0	0	0	0	0	0	0	0	0	0	0	6	2	6	1	6	1	4	6	6	7	3	6	5	5	3	3	6
CGAGGAACAGTCGCTG-1_1	0	0	0	0	0	0	0	0	0	0	0	1	0	0	6	2	6	1	6	1	4	6	6	11	3	6	5	5	3	3	6
CGAGGAATCACTCGAA-1_1	0	0	0	0	0	0	4	4	4	5	5	5	5	4	3	4	3	3	3	2	2	1	0	1	0	1	4	1	1	0	0
CGAGGCTCATTCTCTA-1_1	0	0	0	0	0	0	0	0	0	0	0	0	0	0	0	3	0	4	0	3	1	0	10	0	1	0	0	0	0	1	13
CGAGGCTTCTTCTTCC-1_1	0	0	0	3	3	3	3	3	3	2	2	2	2	5	4	5	5	5	4	1	3	3	2	2	2	2	1	6	2	2	1
CGAGTGCAGGAACGAA-1_1	0	0	0	0	0	0	0	0	0	0	0	0	0	0	0	7	0	7	0	6	5	0	1	9	3	0	5	0	0	3	4
CGAGTGCAGTCCCAAT-1_1	0	1	1	1	1	1	1	1	1	3	3	3	3	3	1	0	2	2	2	8	7	7	7	6	7	7	7	7	6	7	8
CGAGTGCTCATTACGG-1_1	0	0	0	0	0	0	4	4	4	5	5	5	5	4	3	4	3	3	3	2	2	1	0	1	0	1	4	1	1	0	0
CGAGTGCTCATTGCTT-1_1	0	0	0	0	2	2	2	6	7	8	8	7	7	7	8	8	8	8	8	9	10	9	8	8	9	10	9	10	9	6	10
CGAGTTACACACGGTC-1_1	0	0	0	0	4	4	5	5	5	6	6	6	6	6	7	7	7	7	7	6	5	5	5	5	6	5	6	4	5	5	5
CGATCGGAGGCCTGAA-1_1	0	0	0	0	0	0	0	0	0	0	0	0	0	0	6	2	6	1	6	1	4	6	6	7	3	6	5	5	3	3	6
CGATCGGCATCAGCAT-1_1	0	0	0	2	2	2	2	2	2	1	1	1	1	1	2	1	1	0	1	0	0	2	3	3	5	4	2	2	4	4	2
CGATCGGCATGACTTG-1_1	0	0	0	2	2	2	2	2	2	1	1	1	1	1	2	1	1	0	1	0	0	2	3	3	5	4	2	2	4	4	2
CGATGCGGTTCGAGCC-1_1	0	0	0	0	0	0	0	0	0	0	0	0	0	0	0	2	0	1	0	1	4	0	6	9	3	9	5	0	3	3	7
CGATGCGGTTGTCATG-1_1	0	1	1	1	1	1	1	1	1	4	4	4	4	2	5	6	4	6	5	4	6	4	4	4	4	3	3	3	8	9	3
CGATGGCCAGGACTAG-1_1	0	0	0	2	2	2	2	2	2	1	1	1	1	1	2	1	1	0	1	0	0	2	3	3	5	4	2	2	4	4	2
CGCAGGTAGAGAGCAA-1_1	0	2	3	4	5	5	6	7	6	7	7	10	10	11	13	11	15	14	14	15	15	16	16	16	16	15	14	16	17	15	18
CGCAGGTAGTCAAGCG-1_1	0	0	2	3	3	3	3	3	3	2	2	2	2	10	12	12	14	11	13	14	14	15	15	14	15	16	15	9	16	16	17
CGCAGGTTCTTTGGAG-1_1	0	0	0	2	2	2	2	2	2	1	1	1	1	1	9	1	10	0	10	11	12	11	11	12	11	11	10	12	11	10	11
CGCATAATCATGAGAA-1_1	0	0	0	0	0	0	0	0	0	0	0	1	0	0	6	2	6	1	6	1	4	6	6	7	3	6	5	5	3	3	6
CGCATAATCCCGTTGT-1_1	0	0	0	0	0	0	4	4	4	5	5	5	5	4	3	4	3	3	3	2	2	1	0	1	0	1	4	1	1	0	0
CGCCAGACAGCTGAAG-1_1	0	0	0	0	0	0	0	0	0	0	0	0	0	0	0	3	0	4	0	3	1	0	1	0	1	0	0	0	0	1	4
CGCCAGATCTTGCAGA-1_1	0	0	2	3	3	3	3	3	3	2	2	2	2	5	6	5	6	5	6	1	4	6	6	14	3	6	1	9	3	2	6
CGCCATTGTAGTTCCA-1_1	0	0	0	2	2	2	2	2	2	1	1	1	1	12	9	13	10	13	10	11	12	11	11	12	11	11	10	12	11	10	11
CGCGTGAGTACAGTAA-1_1	0	0	0	0	0	0	0	0	0	0	0	0	0	0	0	3	0	4	0	3	1	0	1	0	1	0	0	0	0	1	4
CGGAACCAGAATCGAT-1_1	0	0	0	0	4	4	5	5	5	6	6	6	6	6	7	7	7	7	7	6	5	5	5	5	6	5	6	4	5	5	5
CGGAACCTCCACGGAC-1_1	0	0	2	3	3	3	3	3	3	2	2	2	2	5	4	5	5	5	4	5	3	3	2	2	2	2	1	9	2	2	1
CGGAATTCAGTGCCTG-1_1	0	0	0	1	1	1	1	1	1	3	3	3	3	3	1	0	2	2	2	7	8	8	9	6	8	8	8	8	7	8	8
CGGACACAGACGCTCC-1_1	0	0	0	2	2	2	2	6	7	8	8	7	7	7	8	8	8	8	8	10	10	10	8	8	9	10	9	10	10	6	10
CGGACACCAGCAGTTT-1_1	0	0	0	2	2	2	2	2	2	1	1	1	1	1	2	1	1	0	1	0	0	2	3	3	5	4	2	2	4	4	2
CGGAGAACAATACCTG-1_1	0	1	1	1	1	1	1	1	1	4	4	4	4	2	5	6	4	6	5	4	6	4	4	4	4	3	3	3	8	9	3
CGGAGAATCTAGTGTG-1_1	0	0	0	0	0	0	0	0	0	0	0	0	0	0	0	3	0	4	0	3	1	0	1	0	1	0	0	0	0	1	13
CGGAGAATCTGTCGCT-1_1	0	0	0	2	2	2	2	2	0	1	0	1	1	1	8	1	9	0	9	9	11	9	8	8	10	9	9	11	9	6	7
CGGCAGTGTGGTCTCG-1_1	0	1	1	1	1	1	1	1	1	4	4	4	4	2	5	6	4	6	5	4	9	4	4	4	4	3	3	3	8	9	3
CGGCAGTTCGAACGGA-1_1	0	0	0	0	0	0	0	0	0	0	0	1	0	0	6	2	6	1	6	1	4	6	6	11	3	6	5	5	3	3	6
CGGCAGTTCGCTCTAC-1_1	0	0	0	2	2	2	2	2	2	1	1	1	1	1	2	1	1	0	1	0	0	2	3	3	5	4	2	2	4	4	2
CGGGACTCAGTCCCGA-1_1	0	0	0	0	0	0	4	4	4	5	5	5	5	4	3	4	3	3	3	2	2	1	0	1	0	1	4	1	1	0	0
CGGGCATCAGCTACAT-1_1	0	0	0	2	2	2	2	2	2	1	1	1	1	1	2	1	1	0	1	0	0	2	3	3	5	4	2	2	4	4	2
CGGGCATTCAACTGAC-1_1	0	0	0	2	2	2	2	6	2	1	1	1	1	1	2	8	8	0	1	0	0	10	8	8	9	12	11	10	13	6	12
CGGGCATTCAGGACAG-1_1	0	2	3	4	5	5	6	7	6	7	7	9	9	9	11	10	12	10	12	12	13	14	14	15	13	14	13	15	15	14	15
CGGGCATTCTAGTCAG-1_1	0	0	0	0	4	4	5	5	5	6	6	6	6	6	7	7	7	7	7	6	5	5	5	5	6	5	6	4	5	5	5
CGGGTCACAGCTTTGA-1_1	0	1	1	1	1	1	1	1	1	4	4	4	4	2	1	0	4	6	5	4	9	4	4	4	4	3	3	3	8	9	3
CGGGTCATCGATAACC-1_1	0	0	2	3	3	3	3	3	3	2	2	2	2	10	12	12	14	11	13	14	14	15	15	14	15	16	15	9	16	16	17
CGGGTGTAGCGTGTTT-1_1	0	0	0	0	4	4	5	5	5	6	6	6	6	6	7	7	7	7	7	6	5	5	5	5	6	5	6	4	5	5	5
CGGGTGTCAAAGGATT-1_1	0	0	0	0	0	0	0	0	0	0	0	0	0	0	6	2	6	1	6	1	4	6	6	7	3	6	5	5	3	3	6
CGGGTGTCATAGAATG-1_1	1	6	7	8	10	10	11	13	13	13	13	14	14	16	17	17	19	18	20	21	21	22	22	22	22	22	22	22	23	23	24
CGGGTGTGTCCGGACT-1_1	0	0	2	3	3	3	3	3	3	2	2	2	2	5	4	5	5	5	4	5	3	3	2	2	2	2	1	6	2	2	1
CGGGTGTGTTCACGAT-1_1	0	0	0	0	0	0	0	0	4	6	0	0	0	0	0	3	0	4	0	3	1	0	0	0	1	0	0	0	0	1	13
CGGTCAGGTCCCGCAA-1_1	0	0	0	0	2	2	2	2	2	1	1	1	1	0	9	2	6	1	6	1	4	11	11	12	11	11	10	12	11	10	11
CGGTCAGGTGCGGCTT-1_1	0	0	0	0	0	0	4	4	4	5	5	5	5	4	3	4	3	3	3	2	2	1	0	1	0	1	4	1	1	0	0
CGGTCAGTCAGCCTTC-1_1	0	0	0	1	1	0	1	1	1	3	3	3	3	3	1	0	2	2	2	7	8	8	9	6	8	8	8	8	7	8	14
CGGTCAGTCGTTAGAC-1_1	0	0	0	0	0	0	4	4	4	5	5	5	5	4	3	4	3	3	3	2	2	1	0	1	0	1	4	1	1	0	0
CGTAAGTGTCTACAGT-1_1	0	2	3	4	5	5	6	7	6	7	7	9	9	9	11	10	12	10	12	12	13	14	14	15	13	14	13	15	15	14	15
CGTAATGCACCTGCAG-1_1	0	0	2	3	3	3	3	3	3	2	2	2	2	5	6	5	6	5	6	1	4	6	6	14	2	6	1	9	2	2	6
CGTAATGTCTCACCCA-1_1	0	0	0	1	1	1	1	1	1	3	3	3	3	3	1	0	2	2	2	7	8	8	9	6	8	8	8	8	7	8	14
CGTAATGTCTCTGCTG-1_1	0	0	0	2	2	2	2	2	2	1	1	1	1	1	2	1	1	0	1	0	0	2	3	3	5	4	2	2	4	4	2
CGTAGTAGTGTTAACC-1_1	0	0	0	2	2	2	2	2	2	1	1	1	1	1	2	1	1	0	1	0	0	2	3	3	5	4	2	2	4	4	7
CGTAGTATCTTGCGCT-1_1	0	1	1	1	1	1	1	8	8	4	4	4	4	2	5	6	13	12	11	13	6	12	12	13	14	13	12	13	14	12	16
CGTCCATAGACTCCGC-1_1	0	0	0	2	2	2	2	2	2	1	1	1	1	1	2	1	1	0	1	0	0	2	3	3	5	4	2	2	4	4	2
CGTCCATTCCGACATA-1_1	0	0	0	0	0	0	0	0	0	0	0	0	0	0	0	2	0	1	0	1	1	0	1	9	3	0	0	0	3	3	7
CGTGAATCAAAGGCTG-1_1	0	0	0	2	2	2	2	2	2	1	1	1	1	12	9	13	10	13	10	11	12	11	11	12	11	11	10	12	11	10	11
CGTGAATCACGGCACT-1_1	0	0	0	2	2	2	2	2	2	1	1	1	1	1	2	1	1	0	1	0	0	2	3	3	5	4	2	2	4	4	2
CGTGCTTCACTACCCT-1_1	0	0	0	2	2	2	2	6	7	8	8	7	7	7	8	8	8	8	8	10	10	10	8	8	9	10	9	10	10	6	10
CGTGCTTCAGTATTCG-1_1	0	0	0	0	0	0	0	0	0	0	0	0	0	0	6	2	6	1	6	1	4	6	6	7	3	6	5	5	3	3	6
CGTGCTTTCGAGATAA-1_1	0	0	0	2	2	2	2	2	2	1	1	1	1	1	2	1	1	0	1	0	0	2	3	3	5	4	2	2	4	4	2
CGTGCTTTCTTTGGAG-1_1	0	0	0	0	0	0	4	4	4	5	5	5	5	4	3	4	3	3	3	2	2	1	0	1	0	1	4	1	1	0	0
CGTGTCTAGCGACATG-1_1	0	3	4	5	6	6	7	9	9	9	9	8	8	8	10	9	11	9	17	18	18	19	19	19	19	19	19	19	20	20	21
CGTGTCTCAAGTACCT-1_1	0	0	0	1	1	1	1	1	1	3	3	3	3	3	1	0	2	2	2	7	8	8	9	10	8	8	8	8	7	8	9
CGTGTCTGTCTTCAAG-1_1	0	0	0	2	2	2	2	2	2	1	1	1	1	1	2	1	1	0	1	0	0	13	13	11	12	12	11	14	13	13	12
CGTTAGACATGACAGG-1_1	0	0	0	0	2	2	2	6	7	8	8	7	7	7	8	8	8	8	8	10	10	10	8	8	9	10	9	10	10	6	10
CGTTAGAGTCAAGTTC-1_1	0	0	2	3	3	3	3	3	3	2	2	2	2	5	4	5	5	5	4	5	3	3	2	2	2	2	1	6	2	2	1
CGTTAGATCAAATAGG-1_1	0	0	0	2	2	2	2	2	2	1	1	1	1	1	2	1	1	0	1	0	0	2	3	3	5	4	2	2	4	4	2
CGTTAGATCGGACAAG-1_1	0	0	0	0	2	2	2	6	7	8	8	7	7	7	8	8	8	8	8	9	10	9	8	8	9	10	9	10	9	6	10
CGTTCTGAGTAGGAAG-1_1	0	0	0	0	4	4	5	5	5	6	6	6	6	6	7	7	7	7	7	6	5	5	5	5	6	5	6	4	5	5	5
CGTTCTGCAAACCGGA-1_1	0	1	1	1	1	1	1	1	1	4	4	4	4	2	5	6	4	6	5	4	6	4	4	4	4	3	3	3	8	9	3
CGTTGGGAGATTGGGC-1_1	0	0	0	2	2	2	2	2	2	1	1	1	1	1	2	1	1	0	1	0	0	2	3	3	5	4	2	2	4	4	2
CGTTGGGAGTACTGTC-1_1	0	0	0	2	2	2	2	2	2	1	1	1	1	1	2	1	1	0	1	7	0	2	3	3	5	4	2	2	4	4	2
CGTTGGGGTGCATCTA-1_1	0	1	1	1	1	1	1	8	8	4	4	4	4	2	5	6	13	12	11	13	6	12	12	13	14	13	12	13	14	12	16
CGTTGGGGTTATCCAG-1_1	0	0	2	3	3	3	3	3	3	2	2	2	2	5	4	5	5	5	4	5	3	3	2	2	2	2	1	9	2	2	1
CGTTGGGTCCTGTACC-1_1	0	0	0	2	2	2	2	2	2	1	1	1	1	1	2	1	1	0	1	0	0	2	3	3	5	10	2	2	4	4	2
CTAACCCAGGCCTGCT-1_1	0	0	0	0	0	0	0	0	0	0	0	0	0	0	0	3	0	4	0	3	1	0	1	0	1	0	0	0	0	1	4
CTAACCCCACATGTTG-1_1	0	0	0	2	2	2	2	2	2	1	1	1	1	1	2	1	1	0	1	0	0	2	3	3	5	4	2	2	4	4	2
CTAACCCGTGTCCGGT-1_1	0	0	0	0	0	0	4	4	4	5	5	5	5	4	3	4	3	3	3	2	2	1	0	1	0	1	4	1	1	0	0
CTAACCCTCTGCATAG-1_1	0	0	0	2	2	2	2	2	2	1	1	1	1	1	2	1	1	0	1	0	0	2	3	3	5	4	2	2	4	4	2
CTAACTTAGGATACCG-1_1	0	1	1	1	1	1	1	8	8	4	4	4	4	2	5	6	13	12	11	13	6	12	12	13	14	13	12	13	14	12	16
CTAACTTAGTTCGGTT-1_1	0	0	0	2	2	2	2	2	2	1	1	1	1	1	2	1	1	0	1	0	0	2	3	3	5	4	2	2	4	4	2
CTAACTTCAAATCCCA-1_1	0	0	0	2	2	2	2	6	0	1	0	1	1	1	8	8	9	8	9	9	11	9	8	8	10	9	9	11	9	6	7
CTAACTTCAAGAGAGA-1_1	0	0	0	2	2	2	2	2	2	1	1	1	1	1	2	1	1	0	1	0	0	2	3	3	5	12	2	2	13	4	12
CTAACTTGTCAGGAGT-1_1	0	3	4	5	6	6	7	9	9	9	9	8	8	8	10	9	11	9	17	18	18	19	19	19	19	19	19	19	20	20	21
CTAAGTGAGCGCATCC-1_1	0	0	0	0	0	0	0	0	0	0	0	0	0	0	0	3	0	4	0	3	1	0	10	0	1	0	0	0	0	1	13
CTAAGTGCAGATACTC-1_1	0	0	0	0	4	4	5	5	5	6	6	6	6	6	7	7	7	7	7	6	5	5	5	5	6	5	6	4	5	5	5
CTAAGTGCAGCTGTTA-1_1	0	0	0	2	2	2	2	2	2	1	1	1	1	1	2	1	1	0	1	0	0	2	3	3	5	4	2	2	4	4	2
CTAAGTGCATGCCGGT-1_1	0	0	0	0	0	0	4	4	4	5	5	5	5	4	3	4	3	3	3	2	2	1	0	1	0	1	4	1	1	0	0
CTAAGTGCATGTGCCG-1_1	0	1	1	1	1	1	1	8	8	4	4	4	4	2	5	6	4	6	11	4	6	12	12	13	4	13	12	13	14	12	3
CTAAGTGGTACCACGC-1_1	0	0	2	3	3	3	3	3	3	2	2	2	2	5	4	5	5	5	4	5	3	3	2	2	2	2	1	6	2	2	1
CTAAGTGGTGTTCCTC-1_1	0	4	5	6	7	7	8	10	10	10	10	11	11	13	14	14	16	15	16	17	17	18	18	18	18	18	18	18	19	19	20
CTACAGACAATACGAA-1_1	0	0	0	0	0	0	0	0	0	0	0	0	0	0	0	2	9	1	9	9	11	9	10	9	10	9	16	11	9	17	7
CTACAGACAGGAAGTC-1_1	0	0	0	2	2	2	2	2	2	1	1	1	1	1	2	1	1	0	1	1	0	13	13	11	12	12	11	14	13	13	12
CTACAGATCATCCTGC-1_1	0	0	2	3	3	3	3	3	3	2	2	2	2	5	4	5	5	5	4	5	3	3	2	2	2	2	1	6	2	2	1
CTACATTAGATTCGCT-1_1	0	0	0	0	0	0	0	0	0	0	0	0	0	0	6	2	6	1	6	1	4	6	6	7	3	6	5	5	3	3	6
CTACCCAAGAATCTAG-1_1	0	0	2	3	3	3	3	3	3	2	2	2	2	10	12	12	14	11	13	14	14	15	15	14	15	16	15	9	16	16	17
CTACCCAAGTGAGTTA-1_1	0	0	0	0	0	0	0	0	0	0	0	0	0	0	0	3	0	4	0	3	1	0	1	0	1	0	0	0	0	1	4
CTACCCAAGTTTCAGC-1_1	0	0	0	2	2	2	2	2	2	1	1	1	1	1	2	1	1	0	1	0	0	13	13	11	12	12	11	14	13	13	12
CTACCCACACAGCTGC-1_1	0	0	0	0	4	4	5	5	5	6	6	6	6	6	7	7	7	7	7	6	5	5	5	5	6	5	6	4	5	5	5
CTACCCACAGGTGACA-1_1	0	0	0	2	2	2	2	2	2	1	1	1	1	1	2	1	1	0	1	0	0	2	3	3	5	4	2	2	4	4	2
CTACCCAGTAGAAACT-1_1	0	5	6	7	8	8	9	11	11	11	11	12	12	14	15	15	17	16	18	19	19	20	20	20	20	20	20	20	21	21	22
CTACCCATCAGCCTCT-1_1	0	0	2	3	3	3	3	3	3	2	2	2	2	10	12	12	14	11	13	14	14	15	15	14	15	16	15	9	16	16	17
CTACCCATCGATTGAC-1_1	0	0	0	0	4	4	5	5	5	6	6	6	6	6	7	7	7	7	7	6	5	5	5	5	6	5	6	4	5	5	5
CTACCTGGTTAAGACA-1_1	0	0	0	2	2	2	2	2	2	1	1	1	1	1	2	1	1	0	1	0	0	2	3	3	5	4	2	2	4	4	2
CTACGGGAGCGCCTCA-1_1	0	1	1	1	1	1	1	1	1	3	3	3	3	3	1	0	2	2	2	8	7	7	7	6	7	7	7	7	6	7	8
CTACTATAGAATAACC-1_1	0	2	3	4	5	5	6	7	6	7	7	9	9	9	11	10	12	10	12	12	13	14	14	15	13	14	13	15	15	14	15
CTACTATAGGTGATCG-1_1	0	0	0	0	0	0	4	4	4	5	5	5	5	4	3	4	3	3	3	2	2	1	0	1	0	1	4	1	1	0	0
CTACTATCAGGTCCGT-1_1	0	0	0	2	2	2	2	2	2	1	1	1	1	12	9	13	10	13	10	11	12	11	11	12	11	11	10	12	11	10	11
CTACTATCATCTCCCA-1_1	0	0	0	2	2	2	2	2	2	1	1	1	1	1	2	1	1	0	1	0	0	2	3	3	5	12	2	2	13	4	12
CTACTATGTTAAAGTG-1_1	0	0	2	3	3	3	3	3	3	2	2	2	2	5	4	5	5	5	4	5	3	3	2	2	2	2	1	6	2	2	1
CTACTATTCCTACTGC-1_1	0	0	0	0	0	0	0	0	5	6	0	0	0	0	0	3	0	4	0	3	1	0	5	0	1	0	0	0	0	1	13
CTAGACAAGGAAGTAG-1_1	0	0	0	0	0	0	0	0	0	0	0	0	0	0	0	3	0	4	0	3	1	0	1	9	1	0	0	0	0	1	4
CTAGACACAAGACCGA-1_1	0	1	1	1	1	1	1	8	8	4	4	4	4	2	5	6	13	12	11	13	6	12	12	13	14	13	12	13	14	12	16
CTAGACACAGGGATAC-1_1	0	2	3	4	5	5	6	7	6	7	7	9	9	9	11	10	12	10	12	12	13	14	14	15	13	14	13	15	15	14	15
CTAGACACATCTTCGC-1_1	0	0	0	2	2	2	2	2	2	1	1	1	1	1	2	1	1	0	1	0	0	2	3	3	5	4	2	2	4	4	2
CTAGACATCATTTGCT-1_1	0	2	3	4	5	5	6	7	6	7	7	9	9	9	11	10	12	10	12	12	13	14	14	15	13	14	13	15	15	14	15
CTAGACATCGCCCAGA-1_1	0	0	0	0	0	0	4	4	4	5	5	5	5	4	3	4	3	3	3	2	2	1	0	1	0	1	4	1	1	0	0
CTAGGTAAGGTAGCAC-1_1	0	0	0	2	2	2	2	2	2	1	1	1	1	1	2	1	1	0	1	0	0	2	3	3	5	4	2	2	4	4	2
CTAGGTACAAAGCTCT-1_1	0	0	0	2	2	2	2	2	2	1	1	1	1	12	9	13	10	13	10	11	12	11	11	12	11	11	10	12	11	10	11
CTAGGTAGTTAGGGTG-1_1	0	1	1	1	1	1	1	8	8	4	4	4	4	2	5	6	13	12	11	13	6	12	12	13	14	13	12	13	14	12	16
CTAGGTAGTTGGTGTT-1_1	0	1	1	1	1	1	1	1	1	4	4	4	4	2	1	0	4	6	5	4	9	4	4	4	4	3	3	3	12	11	14
CTATAGGAGCCAGACA-1_1	0	0	0	0	2	2	0	6	0	8	0	0	7	7	8	8	9	8	9	9	11	9	8	8	10	9	9	11	9	6	7
CTATAGGCATCTGTTT-1_1	0	0	2	3	3	3	3	3	3	2	2	2	2	5	4	5	5	5	4	5	3	3	2	2	2	2	1	6	2	2	1
CTATAGGGTCAGCTTA-1_1	0	2	3	4	5	5	6	7	6	7	7	9	9	9	11	10	12	10	12	12	13	14	14	15	13	14	13	15	15	14	15
CTATAGGGTTAGTTCG-1_1	0	0	0	2	2	2	2	2	2	1	1	1	1	1	2	1	1	0	1	0	0	2	3	3	5	10	2	2	4	4	2
CTATAGGTCCACGTGG-1_1	0	0	0	2	2	2	2	6	7	8	8	7	7	7	8	8	8	8	8	10	10	10	8	8	9	10	9	10	10	6	10
CTATCCGAGATAGCAT-1_1	0	0	0	2	2	2	2	2	2	1	1	1	1	1	2	1	1	0	1	0	0	11	13	12	12	11	10	12	13	10	12
CTATCCGAGCAGCCCT-1_1	0	0	2	3	3	3	3	3	3	2	2	2	2	5	4	5	5	5	4	5	3	3	2	2	2	2	1	9	2	2	1
CTATCCGAGTTTCGGT-1_1	0	0	2	3	3	3	3	3	3	2	2	2	2	5	4	5	5	5	4	5	3	3	2	2	2	2	1	6	2	2	1
CTATCCGGTTGTTTGG-1_1	0	0	0	0	4	4	5	5	5	6	6	6	6	6	7	7	7	7	7	6	5	5	5	5	6	5	6	4	5	5	5
CTATCTAAGACCCGCT-1_1	0	0	0	2	4	2	5	6	7	6	6	7	7	6	8	8	8	7	8	10	10	5	8	8	6	5	6	4	10	6	10
CTATCTAAGATACATG-1_1	0	1	1	1	1	1	1	1	1	3	3	3	3	3	1	0	2	2	2	8	7	7	7	6	7	7	7	7	6	7	8
CTATCTAAGGAACATT-1_1	0	4	5	6	9	9	10	12	12	12	12	13	13	15	16	16	18	17	19	20	20	21	21	21	21	21	21	21	22	22	23
CTATCTACAAGAGAGA-1_1	0	0	0	1	1	1	1	1	1	3	3	3	3	3	1	0	2	2	2	7	8	8	9	6	8	8	8	8	7	8	14
CTATCTACAAGAGGTC-1_1	0	0	0	0	0	0	0	0	0	0	0	0	0	0	0	3	0	4	0	3	1	0	1	0	1	0	0	0	0	1	4
CTATCTACACAACCGC-1_1	0	0	0	1	1	1	1	1	1	3	3	3	3	3	1	0	2	2	2	7	8	8	9	10	8	8	8	8	7	8	9
CTATCTAGTAACATAG-1_1	0	0	0	0	0	0	4	4	4	5	5	5	5	4	3	4	3	3	3	2	2	1	0	1	0	1	4	1	1	0	0
CTCAACCAGGGATGTC-1_1	0	1	1	1	1	1	1	8	8	4	4	4	4	2	5	6	4	6	11	4	6	12	12	13	4	13	12	13	14	12	3
CTCAACCCACAACCGC-1_1	0	4	5	6	9	9	10	12	12	12	12	13	13	15	16	16	18	17	19	20	20	21	21	21	21	21	21	21	22	22	23
CTCAACCCATGGCCCA-1_1	0	0	0	2	2	2	2	6	7	8	8	7	7	7	8	8	8	8	8	10	10	10	8	8	9	10	9	10	10	6	10
CTCAACCGTATCTCGA-1_1	0	0	0	0	0	0	0	0	0	0	0	0	0	0	0	3	0	4	0	3	1	0	10	0	1	0	0	0	0	1	13
CTCAACCTCACTGATG-1_1	0	0	0	2	2	2	2	2	2	1	1	1	1	3	1	0	2	2	2	7	8	8	9	10	8	8	8	8	7	8	9
CTCAACCTCCTCTGCA-1_1	0	1	1	1	1	1	1	1	1	4	4	4	4	2	1	0	4	6	5	4	9	4	4	4	4	3	3	3	12	11	3
CTCAAGAAGGCAGGGA-1_1	0	0	0	2	2	2	2	6	2	1	1	1	1	1	2	8	8	0	1	0	0	10	8	8	9	12	11	10	13	6	12
CTCAAGACAACGATTC-1_1	0	0	0	0	4	4	5	5	5	6	6	6	6	6	7	7	7	7	7	6	5	5	5	5	6	5	6	4	5	5	5
CTCAAGACACATGGTT-1_1	0	0	0	0	4	4	5	5	5	6	6	6	6	6	7	7	7	7	7	6	5	5	5	5	6	5	6	4	5	5	5
CTCAAGACATGGCTGC-1_1	0	0	2	3	3	3	3	3	3	2	2	2	2	5	4	5	5	5	4	5	3	3	2	2	2	2	1	9	2	2	1
CTCAAGAGTCGCGTCA-1_1	0	1	1	1	1	1	1	1	1	3	3	3	3	3	1	0	2	2	2	8	7	7	7	6	7	7	7	7	6	7	8
CTCAAGAGTGCGACAA-1_1	0	2	3	4	5	5	6	7	6	7	7	9	9	9	11	10	12	10	12	12	13	14	14	15	13	14	13	15	15	14	15
CTCAATTCACTGGAAG-1_1	0	2	3	4	5	5	6	7	6	7	7	10	10	11	13	11	15	14	14	15	15	16	16	16	16	15	14	16	17	15	18
CTCAATTGTGGCTGCT-1_1	0	0	0	0	4	4	5	5	5	6	6	6	6	6	7	7	7	7	7	6	5	5	5	5	6	5	6	4	5	5	5
CTCAATTTCCAGCTCT-1_1	0	2	3	4	5	5	6	7	6	7	7	10	10	11	13	11	15	14	14	15	15	16	16	16	16	15	14	16	17	15	18
CTCACTGCAGCCTATA-1_1	0	0	0	0	0	0	4	4	4	5	5	5	5	4	3	4	3	3	3	2	2	1	0	1	0	1	4	1	1	0	0
CTCACTGGTGAAGCGT-1_1	0	0	0	0	0	0	0	0	0	0	0	0	0	0	6	2	6	1	6	1	4	6	6	11	3	6	5	5	3	3	6
CTCACTGTCCGTGACG-1_1	0	0	0	2	2	2	2	2	2	1	1	1	1	1	2	1	1	0	1	0	0	13	13	11	12	12	11	14	13	13	12
CTCAGAACAAGTATAG-1_1	0	0	0	1	1	1	1	1	1	3	3	3	3	3	1	0	2	2	2	7	8	8	9	10	8	8	8	8	7	8	9
CTCAGAACAGCAGTAG-1_1	0	0	0	0	0	0	0	0	0	0	0	0	0	0	0	2	0	1	0	1	4	0	1	9	3	0	0	0	3	3	7
CTCAGAACATGTGGCC-1_1	0	0	0	2	2	2	2	2	2	1	1	1	1	1	2	1	1	0	1	0	0	2	3	3	5	4	2	2	4	4	2
CTCAGAAGTAATGTGA-1_1	0	0	0	1	1	1	1	1	1	3	3	3	3	3	1	0	2	2	2	7	8	8	9	6	8	8	8	8	7	8	14
CTCAGGGAGCATCTTG-1_1	0	0	0	2	2	2	2	2	2	1	1	1	1	1	2	1	1	0	1	0	0	2	3	3	5	4	2	2	4	4	2
CTCAGGGCAGCACAGA-1_1	0	0	0	0	0	0	0	0	0	0	0	0	0	0	6	2	6	1	6	1	4	6	6	7	3	6	5	5	3	3	6
CTCAGGGGTAACGGTG-1_1	0	0	0	0	0	0	0	0	0	0	0	0	0	0	6	2	6	1	6	1	4	6	6	7	3	6	5	5	3	3	6
CTCATCGAGGGTTAAT-1_1	0	0	0	2	2	2	2	2	2	1	1	1	1	1	2	1	1	0	1	0	0	13	13	11	12	12	11	14	13	13	12
CTCATCGTCACCTTAT-1_1	0	0	0	0	0	0	0	0	0	0	0	0	0	0	0	3	0	4	0	3	1	0	10	0	1	0	0	0	0	1	13
CTCATCGTCACTGTCC-1_1	0	0	0	1	1	1	1	1	1	3	3	3	3	3	1	0	2	2	2	7	8	8	9	10	8	8	8	8	7	8	9
CTCATGCCAAGATGTA-1_1	0	3	4	5	6	6	7	9	9	9	9	8	8	8	10	9	11	9	15	16	16	17	17	17	17	17	17	17	18	18	19
CTCATGCCAAGCTCTA-1_1	0	0	0	0	0	0	0	4	4	5	5	0	5	4	0	4	3	3	3	2	1	1	0	1	0	0	0	1	1	0	0
CTCATGCGTCATGGCC-1_1	0	0	0	2	2	2	2	2	2	1	1	1	1	12	9	13	10	13	10	11	12	11	11	12	11	11	10	12	11	10	11
CTCATTAAGCAGTACG-1_1	0	0	0	1	1	1	1	1	1	3	3	3	3	3	1	0	2	2	2	7	8	8	9	10	8	8	8	8	7	8	9
CTCATTACATTGCTTT-1_1	0	3	4	5	6	6	7	9	9	9	9	8	8	8	10	9	11	9	15	16	16	17	17	17	17	17	17	17	18	18	19
CTCCAACAGGCCATAG-1_1	0	1	1	1	1	1	1	1	1	3	3	3	3	3	1	0	2	2	2	8	7	7	7	6	7	7	7	7	6	7	8
CTCCAACGTCATCAGT-1_1	0	0	0	0	0	0	4	4	4	5	5	5	5	4	3	4	3	3	3	2	2	1	0	1	0	1	4	1	1	0	0
CTCCAACGTTCCACAA-1_1	0	0	2	3	3	3	3	3	3	2	2	2	2	10	12	12	14	11	13	14	14	15	15	14	15	16	15	9	16	16	17
CTCCAACTCTACTTCA-1_1	0	0	0	2	2	2	2	2	2	1	1	1	1	1	2	1	1	0	1	0	0	2	3	3	5	4	2	2	4	4	2
CTCCAACTCTCTGACC-1_1	0	0	2	3	3	3	3	3	3	2	2	2	2	5	4	5	5	5	4	5	3	3	2	2	2	2	1	9	2	2	1
CTCCACAAGCGCATCC-1_1	0	0	2	3	3	3	3	3	3	2	2	2	2	5	4	5	5	5	4	5	3	3	2	2	2	2	1	9	2	2	1
CTCCACACAGTTCACA-1_1	0	0	0	0	4	4	5	5	5	6	6	6	6	6	7	7	7	7	7	6	5	5	5	5	6	5	6	4	5	5	5
CTCCACATCATCGCAA-1_1	0	0	0	2	2	2	2	2	2	1	1	1	1	1	2	1	1	0	1	0	0	2	3	3	5	4	2	2	4	4	2
CTCCATGAGCCATATC-1_1	0	0	0	0	0	0	0	4	4	5	5	0	5	4	0	4	0	3	3	2	1	1	0	1	0	0	0	1	1	0	0
CTCCATGAGGACCCAA-1_1	0	0	0	0	0	0	0	0	0	0	0	0	0	0	6	2	6	1	6	1	4	6	6	7	3	6	5	5	3	3	6
CTCCATGAGGATAATC-1_1	0	0	0	2	2	2	2	2	2	1	1	1	1	1	2	1	1	0	1	0	0	2	3	3	5	4	2	2	4	4	2
CTCCATGAGTGGATTA-1_1	0	0	2	3	3	3	3	3	3	2	2	2	2	5	4	5	5	5	4	5	3	3	2	2	2	2	1	6	2	2	1
CTCCATGTCCGTCAAA-1_1	0	0	0	0	4	4	5	5	5	6	6	6	6	6	7	7	7	7	7	6	5	5	5	5	6	5	6	4	5	5	5
CTCCCAAAGTCATACC-1_1	0	0	0	0	4	4	5	5	5	6	6	6	6	6	7	7	7	7	7	6	5	5	5	5	6	5	6	4	5	5	5
CTCCCAACAGACCGCT-1_1	0	0	0	2	2	2	2	6	7	8	8	7	7	7	8	8	8	8	8	10	10	10	8	8	9	10	9	10	10	6	10
CTCCCAAGTGGGTTGA-1_1	0	0	0	1	1	1	1	1	1	3	3	3	3	3	1	0	2	2	2	7	8	8	9	10	8	8	8	8	7	8	9
CTCCCAATCAACGTGT-1_1	0	0	0	2	2	2	2	2	2	1	1	1	1	12	9	13	10	13	10	11	12	11	11	12	11	11	10	12	11	10	11
CTCCCTCCAGAGATTA-1_1	0	0	0	2	2	2	2	2	2	1	1	1	1	1	2	1	1	0	1	0	0	2	3	3	5	4	2	2	4	4	2
CTCCCTCGTCTTACAG-1_1	0	0	0	2	2	2	2	6	7	8	8	7	7	7	8	8	8	8	8	10	10	10	8	8	9	10	9	10	10	6	10
CTCCCTCGTGCTATTG-1_1	0	0	0	2	4	4	5	5	7	6	6	7	7	6	8	8	8	7	8	10	10	5	8	5	6	5	6	4	10	5	10
CTCCCTCTCGCAATTG-1_1	0	0	0	0	4	4	5	5	5	6	6	6	6	6	7	7	7	7	7	6	5	5	5	5	6	5	6	4	5	5	5
CTCCGATAGCAGTCTT-1_1	0	1	1	1	1	1	1	1	1	3	3	3	3	3	1	0	2	2	2	8	7	7	7	6	7	7	7	7	6	7	8
CTCCGATGTTGCTCCT-1_1	0	0	0	0	0	0	0	0	0	0	0	0	0	0	6	2	6	1	6	1	4	6	6	7	3	6	5	5	3	3	6
CTCCGATTCACCTTGC-1_1	0	1	1	1	1	1	1	8	8	4	4	4	4	2	5	6	13	12	11	13	6	12	12	13	14	13	12	13	14	12	16
CTCCGATTCCGCCTAT-1_1	0	0	0	0	0	0	0	0	0	0	0	0	0	0	6	2	6	1	6	1	4	6	6	7	3	6	5	5	3	3	6
CTCCGATTCTAACACG-1_1	0	0	0	0	0	0	0	0	0	0	0	1	0	0	6	2	6	1	6	1	4	6	6	11	3	6	5	5	3	3	6
CTCCTCCAGATGGTAT-1_1	0	0	0	0	0	0	4	4	4	5	5	5	5	4	3	4	3	3	3	2	2	1	0	1	0	1	4	1	1	0	0
CTCCTCCTCTTAGCCC-1_1	0	0	2	3	3	3	3	3	3	2	2	2	2	5	4	5	5	5	4	5	3	3	2	2	2	2	1	9	2	2	1
CTCCTTTAGCTACTAC-1_1	0	0	0	1	1	1	1	1	1	4	4	4	4	3	1	0	4	6	5	7	9	8	9	4	8	8	8	8	12	11	14
CTCCTTTCACGACGCT-1_1	0	0	2	3	3	3	3	3	3	2	2	2	2	5	4	5	5	5	4	5	3	3	2	2	2	2	1	9	2	2	1
CTCCTTTGTGATTAGA-1_1	0	0	0	0	0	0	0	0	0	0	0	0	0	0	0	3	0	4	0	3	1	0	10	0	1	0	0	0	0	1	13
CTCCTTTTCCTTATGT-1_1	0	0	0	0	0	0	0	0	0	0	0	0	0	0	6	2	6	1	6	1	4	6	6	7	3	6	5	5	3	3	6
CTCGAGGAGGAAGAAC-1_1	0	0	0	2	2	2	2	6	7	8	8	7	7	7	8	8	8	8	8	10	10	10	8	8	9	10	9	10	10	6	10
CTCGAGGGTGGTACAG-1_1	0	0	0	1	1	1	1	1	1	3	3	3	3	3	1	0	2	2	2	7	8	8	9	10	8	8	8	8	7	8	9
CTCTCAGAGATTACCC-1_1	0	0	2	3	3	3	3	3	3	2	2	2	2	5	4	5	5	5	4	5	3	3	2	2	2	2	1	6	2	2	1
CTCTCAGTCCTCACCA-1_1	0	0	2	3	3	3	3	3	3	2	2	2	2	10	12	12	14	11	13	14	14	15	15	14	15	16	15	9	16	16	17
CTCTCAGTCTTGAACG-1_1	0	0	0	2	2	2	2	6	7	8	8	7	7	7	8	8	8	8	8	10	10	10	8	8	9	10	9	10	10	6	10
CTCTCGAAGTAGGATT-1_1	0	0	0	2	2	2	2	2	2	1	1	1	1	1	2	1	1	0	1	0	0	2	3	3	5	4	2	2	4	4	2
CTCTCGACAAAGACTA-1_1	0	0	0	2	2	2	2	2	2	1	1	1	1	1	2	1	1	0	1	0	0	2	3	3	5	4	2	2	4	4	2
CTCTCGACATAGAATG-1_1	0	0	0	0	0	0	0	0	0	0	0	0	0	0	6	2	6	1	6	1	4	6	1	7	3	6	5	5	3	3	6
CTCTCGATCATTGCTT-1_1	0	0	0	0	0	0	0	0	0	0	0	0	0	0	0	3	0	4	0	3	1	0	1	0	1	0	0	0	0	1	4
CTCTCGATCGAGCTGC-1_1	0	0	0	1	1	1	1	1	1	3	3	3	3	3	1	0	2	2	2	7	8	8	9	6	8	8	8	8	7	8	14
CTCTGGTAGAGCACTG-1_1	0	4	5	6	7	7	8	10	10	10	10	11	11	13	14	14	16	15	16	17	17	18	18	18	18	18	18	18	19	19	20
CTCTGGTAGATGTAGT-1_1	0	4	5	6	7	7	8	10	10	10	10	11	11	13	14	14	16	15	16	17	17	18	18	18	18	18	18	18	19	19	20
CTCTGGTAGCGACTGA-1_1	0	0	0	2	2	2	2	6	7	8	8	7	7	7	8	8	8	8	8	10	10	10	8	8	9	10	9	10	10	6	10
CTCTGGTAGTTGTAAG-1_1	0	2	3	4	5	5	6	7	6	7	7	9	9	9	11	10	12	10	12	12	13	14	14	15	13	14	13	15	15	14	15
CTGAATGAGTTCGGTT-1_1	0	0	0	0	0	0	0	0	0	0	0	0	0	0	6	2	6	1	6	1	4	6	6	11	3	6	5	5	3	3	6
CTGAATGGTTCCGCAG-1_1	0	0	0	2	2	2	2	2	2	1	1	1	1	1	2	1	1	0	1	0	0	2	3	3	5	4	2	2	4	4	2
CTGAATGGTTCCGTTC-1_1	0	0	0	0	0	0	0	0	0	0	0	0	0	0	6	2	6	1	6	1	4	6	6	7	3	6	5	5	3	3	6
CTGAATGGTTCGGTAT-1_1	0	5	6	7	8	8	9	11	11	11	11	12	12	14	15	15	17	16	18	19	19	20	20	20	20	20	20	20	21	21	22
CTGAATGTCAGACAAA-1_1	0	0	0	0	4	4	5	5	5	6	6	6	6	6	7	7	7	7	7	6	5	5	5	5	6	5	6	4	5	5	5
CTGAGCGCACACGGTC-1_1	0	0	0	0	0	0	4	4	4	5	5	5	5	4	3	4	3	3	3	2	2	1	0	1	0	1	4	1	1	0	0
CTGAGCGCACTGGACC-1_1	0	0	0	0	0	0	0	0	0	0	0	0	0	0	0	3	0	4	0	3	1	0	10	0	1	0	0	0	0	1	13
CTGAGCGCAGACACCC-1_1	0	0	2	3	3	3	3	3	3	2	2	2	2	5	4	5	5	5	4	5	3	3	2	2	2	2	1	6	2	2	1
CTGAGCGCAGATCACT-1_1	0	1	1	1	1	1	1	1	1	4	4	4	4	2	1	0	4	6	5	4	9	4	4	4	4	3	3	3	12	11	3
CTGAGCGCATGGCACC-1_1	0	0	0	0	4	4	5	5	5	6	6	6	6	6	7	7	7	7	7	6	5	5	5	5	6	5	6	4	5	5	5
CTGAGCGCATTAAAGG-1_1	0	0	0	0	0	0	0	0	0	0	0	0	0	0	6	2	6	1	6	1	4	6	6	7	3	6	5	5	3	3	6
CTGAGCGCATTGAAGA-1_1	0	0	0	0	0	0	0	0	0	0	0	0	0	0	0	3	0	4	0	3	1	0	10	0	1	0	0	0	0	1	13
CTGAGGCCAAACACCT-1_1	0	0	0	0	0	2	0	2	0	0	0	1	0	1	6	2	6	1	6	1	4	6	6	7	3	6	5	5	3	3	6
CTGAGGCCACTGTCCT-1_1	0	0	0	1	0	1	1	1	1	3	3	3	3	3	1	0	2	2	2	7	8	8	9	10	8	8	8	8	7	8	9
CTGATCCAGCAGCACA-1_1	0	0	2	3	3	3	3	3	3	2	2	2	2	10	12	12	14	11	13	14	14	15	15	14	15	16	15	9	16	16	17
CTGATCCAGGAAGTAG-1_1	0	0	0	2	2	2	2	2	2	1	1	1	1	1	2	1	1	0	1	0	0	2	3	3	5	4	2	2	4	4	2
CTGATCCAGGTGCTGA-1_1	0	0	0	2	2	2	2	6	7	8	8	7	7	7	8	8	8	8	8	10	10	10	8	8	9	10	9	10	10	6	10
CTGATCCTCATGTCAG-1_1	0	0	2	3	3	3	3	3	3	2	2	2	2	10	12	12	14	11	13	14	14	15	15	14	15	16	15	9	16	16	17
CTGCAGGAGAGGTTTA-1_1	0	0	0	0	0	0	0	0	0	0	0	0	0	0	6	2	6	1	6	1	4	6	6	7	3	6	5	5	3	3	6
CTGCAGGAGATGTTAG-1_1	0	0	0	2	2	2	2	6	7	8	8	7	7	7	8	8	8	8	8	10	10	10	8	8	9	10	9	10	10	6	10
CTGCAGGAGGAGTCTG-1_1	0	0	0	2	2	2	2	2	2	1	1	1	1	12	9	13	10	13	10	11	12	11	11	12	11	11	10	12	11	10	11
CTGCAGGCATTGCAAC-1_1	0	0	0	1	1	1	1	1	1	3	3	3	3	3	1	0	2	2	2	7	8	8	9	10	8	8	8	8	7	8	9
CTGCAGGGTGTCATCA-1_1	0	1	1	1	1	1	1	1	1	4	4	4	4	2	1	0	4	6	5	4	9	4	4	4	4	3	3	3	12	11	14
CTGCAGGGTGTGCTTA-1_1	0	0	0	0	0	0	0	1	0	0	0	0	3	0	6	2	6	1	6	1	4	9	6	7	3	7	5	5	3	3	6
CTGCAGGGTTCGAGCC-1_1	0	0	0	2	2	2	2	2	2	1	1	1	1	1	2	1	1	0	1	0	0	2	3	3	5	4	2	2	4	4	2
CTGCAGGGTTGGTAGG-1_1	0	0	0	2	2	2	2	2	2	1	1	1	1	12	9	13	10	13	10	11	12	11	11	12	11	11	10	12	11	10	11
CTGCATCAGTACGTCT-1_1	0	0	0	0	0	0	4	4	4	5	5	5	5	4	3	4	3	3	3	2	2	1	4	1	0	1	3	1	1	0	14
CTGCATCGTGTGTGTT-1_1	0	0	0	1	1	1	1	1	1	3	3	3	3	3	1	0	2	2	2	7	8	8	9	10	8	8	8	8	7	8	9
CTGCATCTCGGCCTTT-1_1	0	0	0	0	0	0	0	0	0	0	0	0	0	0	6	2	6	1	6	1	4	6	6	7	3	6	5	5	3	3	6
CTGCCATCACTTTATC-1_1	0	0	0	2	2	2	2	6	7	8	8	7	7	7	8	8	8	8	8	10	10	10	8	8	9	10	9	10	10	6	10
CTGCCATCAGAGATGC-1_1	0	0	0	0	4	4	5	5	5	6	6	6	6	6	7	7	7	7	7	6	5	5	5	5	6	5	6	4	5	5	5
CTGCCATGTGTGTGGA-1_1	0	0	0	0	0	0	0	0	0	0	0	0	0	0	0	3	0	4	0	3	1	0	1	0	1	0	0	0	0	1	4
CTGCCTAAGTCATGAA-1_1	0	0	0	2	2	2	2	2	2	1	1	1	1	1	2	1	1	0	1	0	0	2	3	3	5	4	2	2	4	4	2
CTGCCTATCGATAACC-1_1	0	0	0	0	0	0	0	0	0	0	0	0	0	0	6	2	6	1	6	1	4	6	6	7	3	6	5	5	3	3	6
CTGCGAGAGCCATGCC-1_1	0	0	0	2	2	2	2	6	7	8	8	7	7	7	8	8	8	8	8	10	10	10	8	8	9	10	9	10	10	6	10
CTGCGAGGTAGGCAAC-1_1	0	1	1	1	1	1	1	1	1	4	4	4	4	2	5	6	4	6	5	4	6	4	4	4	4	3	3	3	8	9	3
CTGCGAGTCCTTGGAA-1_1	0	0	0	0	0	0	0	0	0	0	0	0	0	0	0	3	0	4	0	3	1	0	10	0	1	0	0	0	0	1	13
CTGCTCAGTTCCGCGA-1_1	0	0	0	2	2	2	2	2	2	1	1	1	1	1	9	1	10	0	10	11	12	11	11	12	11	11	10	12	11	10	11
CTGCTCATCAGGAAGC-1_1	0	0	0	2	2	2	2	6	7	8	8	7	7	7	8	8	8	8	8	10	10	10	8	8	9	10	9	10	10	6	10
CTGCTCATCTACTATC-1_1	0	0	0	2	2	2	2	6	7	8	8	7	7	7	8	8	8	8	8	10	10	10	8	8	9	10	9	10	10	6	10
CTGGACGAGTATTCCG-1_1	0	0	0	2	2	2	2	2	2	1	1	1	1	1	2	1	1	0	1	0	0	2	3	3	5	4	2	2	4	4	2
CTGGACGCATGGCTGC-1_1	0	0	0	2	2	2	2	2	2	1	1	1	1	1	2	1	1	0	1	0	0	2	3	3	5	4	2	2	4	4	2
CTGGACGGTACAGAGC-1_1	0	0	0	0	0	0	4	1	4	3	3	3	3	3	1	0	2	2	2	7	8	8	9	10	8	8	8	8	7	8	9
CTGGACGTCGGTGAAG-1_1	0	0	0	2	2	2	2	2	2	1	1	1	1	1	2	1	1	0	1	0	0	2	3	3	5	4	2	2	4	4	2
CTGGCAGCAACCTAAC-1_1	0	0	0	0	0	0	4	4	4	5	5	5	5	4	3	4	3	3	3	2	2	1	0	1	0	1	4	1	1	0	0
CTGGCAGGTGATACAA-1_1	0	0	0	0	0	0	0	0	0	0	0	0	0	0	0	2	0	1	0	1	4	0	1	9	3	0	5	0	3	3	7
CTGGCAGGTGATAGAT-1_1	0	1	1	1	1	1	1	8	8	4	4	4	4	2	5	6	13	12	11	13	6	12	12	13	14	13	12	13	14	12	16
CTGGCAGTCAAATGAG-1_1	0	0	0	0	4	4	5	5	5	6	6	6	6	6	7	7	7	7	7	6	5	5	5	5	6	5	6	4	5	5	5
CTGGCAGTCCGTACGG-1_1	0	0	0	2	2	2	2	2	2	1	1	1	1	12	9	13	10	13	10	11	12	11	11	12	11	11	10	12	11	10	11
CTGGCAGTCGATCCCT-1_1	0	1	1	1	1	1	1	1	1	4	4	4	4	2	5	6	4	6	5	4	6	4	4	4	4	3	3	3	8	9	3
CTGGTCTCAATCCTTT-1_1	0	1	1	1	1	1	1	1	1	3	3	3	3	3	1	0	2	2	2	8	7	7	7	6	7	7	7	7	6	7	8
CTGGTCTCACTGTTCC-1_1	0	0	0	2	2	2	2	6	5	6	6	6	1	6	8	8	8	0	7	0	5	5	8	8	9	12	6	10	13	6	12
CTGGTCTCAGAGGAAA-1_1	0	0	0	0	4	4	5	5	5	6	6	6	6	6	7	7	7	7	7	6	5	5	5	5	6	5	6	4	5	5	5
CTGGTCTGTCCACATA-1_1	0	1	1	1	1	1	1	8	8	4	4	4	4	2	5	6	4	6	11	4	6	12	12	13	4	13	12	13	14	12	3
CTGGTCTTCTAACGCA-1_1	0	0	0	2	2	2	2	6	7	8	8	7	7	7	8	8	8	8	8	10	10	10	8	8	9	10	9	10	10	6	10
CTGTACCAGTGGTTGG-1_1	0	0	2	3	3	3	3	3	3	2	2	2	2	10	12	12	14	11	13	14	14	15	15	14	15	16	15	9	16	16	17
CTGTACCCAGATCACT-1_1	0	0	0	0	0	0	0	0	0	0	0	0	0	0	6	2	6	1	6	1	4	6	6	7	3	6	5	5	3	3	6
CTGTACCCAGATCATC-1_1	0	2	3	4	5	5	6	7	6	7	7	9	9	9	11	10	12	10	12	12	13	14	14	15	13	14	13	15	15	14	15
CTGTACCTCAGCTCTC-1_1	0	0	0	2	2	2	2	6	2	1	1	1	1	1	2	8	8	0	1	0	0	10	8	8	9	10	2	10	10	6	2
CTGTACCTCCACACAA-1_1	0	0	0	2	2	2	2	2	2	1	1	1	1	12	9	13	10	13	10	11	12	11	11	12	11	11	10	12	11	10	11
CTGTACCTCGGTTAGT-1_1	0	0	0	0	0	0	0	2	0	0	1	1	0	0	6	2	6	1	6	1	4	6	6	11	3	6	5	5	3	3	6
CTGTAGAAGCCATGCC-1_1	0	0	0	0	4	4	5	5	5	6	6	6	6	6	7	7	7	7	7	6	5	5	5	5	6	5	6	4	5	5	5
CTGTAGAAGGAGGCAG-1_1	0	0	0	2	2	2	2	2	2	1	1	1	1	12	9	13	10	13	10	11	12	11	11	12	11	11	10	12	11	10	11
CTGTAGAAGTCGAGGT-1_1	0	0	0	0	0	0	0	0	0	0	0	0	0	0	6	2	6	1	6	1	4	6	6	7	3	6	5	5	3	3	6
CTGTAGAGTCTCGCGA-1_1	0	0	0	0	4	4	5	5	5	6	6	6	6	6	7	7	7	7	7	6	5	5	5	5	6	5	6	4	5	5	5
CTGTAGAGTTTCAGAC-1_1	0	0	2	3	3	3	3	3	3	2	2	2	2	5	4	5	5	5	4	5	3	3	2	2	2	2	1	6	2	2	1
CTGTATTCACATGTTG-1_1	0	0	2	3	3	3	3	3	3	2	2	2	2	5	4	5	5	5	4	5	3	3	2	2	2	2	1	6	2	2	1
CTGTATTGTGTACATC-1_1	0	0	0	0	4	4	5	5	5	6	6	6	6	6	7	7	7	7	7	6	5	5	5	5	6	5	6	4	5	5	5
CTGTCGTAGCCGCTTG-1_1	0	5	6	7	8	8	9	11	11	11	11	12	12	14	15	15	17	16	18	19	19	20	20	20	20	20	20	20	21	21	22
CTGTCGTAGTAATTGG-1_1	0	1	1	1	1	1	1	1	1	4	4	4	4	2	5	6	4	6	5	4	9	4	4	4	4	3	3	3	8	9	3
CTGTCGTAGTATGATG-1_1	0	0	0	0	0	0	0	0	0	0	0	0	0	0	0	3	0	4	0	3	1	0	1	0	1	0	0	0	0	1	4
CTGTCGTGTGGCGTAA-1_1	0	0	0	1	1	1	1	1	1	3	3	3	3	3	1	0	2	2	2	7	8	8	9	10	8	8	8	8	7	8	9
CTGTCGTGTTTGGAAA-1_1	0	0	0	0	0	0	0	0	0	0	0	0	0	0	6	2	6	1	6	1	4	6	6	7	3	6	5	5	3	3	6
CTGTGAAAGCACACAG-1_1	0	0	0	2	2	2	2	2	2	1	1	1	1	1	2	1	1	0	1	1	0	13	13	11	12	12	11	14	13	13	12
CTGTGAACATTGTAGC-1_1	0	2	3	4	5	5	6	7	6	7	7	9	9	9	11	10	12	10	12	12	13	14	14	15	13	14	13	15	15	14	15
CTGTGGGCAATACAGA-1_1	0	0	0	0	4	4	5	5	5	6	6	6	6	6	7	7	7	7	7	6	5	5	5	5	6	5	6	4	5	5	5
CTGTGGGCAGGCTTGC-1_1	0	2	3	4	5	5	6	7	6	7	7	10	10	11	13	11	15	14	14	15	15	16	16	16	16	15	14	16	17	15	18
CTGTGGGGTGAATAAC-1_1	0	0	0	0	0	0	4	4	4	5	5	5	5	4	3	4	3	3	3	2	2	1	0	1	0	1	4	1	1	0	0
CTGTGGGTCGACGCGT-1_1	0	0	0	2	2	2	2	6	7	8	8	7	7	7	8	8	8	8	8	10	10	10	8	8	9	10	9	10	10	6	10
CTTACCGAGAGGCTGT-1_1	0	0	0	0	0	0	0	4	4	5	5	5	5	0	3	3	6	3	6	2	4	0	6	0	3	6	4	0	0	0	13
CTTAGGAAGCATGGGT-1_1	0	0	2	3	3	3	3	3	3	2	2	2	2	5	4	5	5	5	4	5	3	3	2	2	2	2	1	9	2	2	1
CTTAGGAAGCTACGTT-1_1	0	0	0	0	0	0	0	0	0	0	0	0	0	0	0	2	0	1	0	1	4	0	1	9	3	0	5	0	0	3	4
CTTAGGAGTCGTAATC-1_1	0	0	0	0	0	0	4	4	4	5	5	5	5	4	3	4	3	3	3	2	2	1	0	1	0	1	4	1	1	0	0
CTTAGGATCGTAGAGG-1_1	0	0	0	0	0	0	0	0	0	0	0	0	0	0	6	2	6	1	6	1	4	6	6	7	3	6	5	5	3	3	6
CTTCCGAAGGTCGACA-1_1	0	0	0	0	4	4	5	5	5	6	6	6	6	6	7	7	7	7	7	6	5	5	5	5	6	5	6	4	5	5	5
CTTCCGATCCTCAGGG-1_1	0	0	0	0	0	0	0	0	0	0	0	0	0	0	0	3	0	4	0	3	1	0	1	0	1	0	0	0	0	1	4
CTTCCTTAGTCCCTAA-1_1	0	0	0	0	0	0	0	0	0	0	0	0	0	0	0	2	9	1	9	9	11	9	10	9	10	9	16	11	9	17	7
CTTCCTTCACCTAAAC-1_1	0	0	0	2	2	2	2	2	2	1	1	1	1	1	2	1	1	0	1	0	0	2	3	3	5	4	2	2	4	4	2
CTTCCTTTCCGAGAAG-1_1	0	0	0	2	2	2	2	2	2	1	1	1	1	1	2	1	1	0	1	0	0	2	3	3	5	4	2	2	4	4	2
CTTCGGTCAACATCGT-1_1	0	0	0	0	0	0	0	0	0	0	0	0	0	0	0	3	0	4	0	3	1	0	1	0	1	0	0	0	0	1	13
CTTCGGTTCAATCAGC-1_1	0	0	0	0	0	0	0	0	0	0	0	0	0	0	6	2	6	1	6	1	4	6	6	7	3	6	5	5	3	3	6
CTTCGGTTCGAGTCCG-1_1	0	2	3	4	5	5	6	7	6	7	7	10	10	11	13	11	15	14	14	15	15	16	16	16	16	15	14	16	17	15	18
CTTCGGTTCTTCCCGA-1_1	0	0	0	0	0	0	0	0	0	0	0	0	0	0	6	2	6	1	6	1	4	6	6	7	3	6	5	5	3	3	6
CTTCTAAAGAGAGAAC-1_1	0	0	2	3	3	3	3	3	3	2	2	2	2	5	4	5	5	5	4	5	3	3	2	2	2	2	1	6	2	2	1
CTTCTAACACCTATCC-1_1	0	2	3	4	5	5	6	1	6	7	7	10	10	11	13	11	15	14	14	15	15	16	16	16	16	15	14	16	17	15	18
CTTCTAACATGACCCG-1_1	0	0	2	3	3	3	3	3	3	2	2	2	2	5	4	5	5	5	4	5	3	3	2	2	2	2	1	6	2	2	1
CTTCTAAGTAGCACAG-1_1	0	0	2	3	3	3	3	3	3	2	2	2	2	5	6	5	6	5	6	1	4	6	6	14	3	6	1	9	3	2	6
CTTCTAATCCTCAGGG-1_1	0	0	0	2	2	2	2	2	2	1	1	1	1	1	2	1	1	0	1	0	0	2	3	3	5	4	2	2	4	4	2
CTTCTAATCGGCCAAC-1_1	0	0	0	0	4	4	5	5	5	6	6	6	6	6	7	7	7	7	7	6	5	5	5	5	6	5	6	4	5	5	5
CTTCTCTCAAATGAGT-1_1	0	0	0	0	0	0	0	0	0	0	0	0	0	0	6	2	6	1	6	1	4	6	6	7	3	6	5	5	3	3	6
CTTCTCTGTCGTGGAA-1_1	0	4	5	6	9	9	10	12	12	12	12	13	13	15	16	16	18	17	19	20	20	21	21	21	21	21	21	21	22	22	23
CTTCTCTGTGTCATGT-1_1	0	0	0	2	2	2	2	2	2	1	1	1	1	1	2	1	1	0	1	0	0	2	3	3	5	10	2	2	4	4	2
CTTCTCTTCCCTGGTT-1_1	0	0	0	0	0	0	0	0	0	0	0	0	0	0	0	3	0	4	0	3	1	0	1	0	1	0	0	0	0	1	4
CTTGAGAAGAGCAAGA-1_1	0	0	2	3	3	3	3	3	3	2	2	2	2	5	4	5	5	5	4	5	3	3	2	2	2	2	1	6	2	2	1
CTTGAGAAGTCCCGAC-1_1	0	0	0	2	2	2	2	2	2	3	1	3	1	12	9	13	10	13	10	11	12	11	11	12	11	11	10	12	11	10	11
CTTGAGACATGGCGCT-1_1	0	0	0	0	0	0	4	4	4	5	5	5	5	4	3	4	3	3	3	2	2	1	4	1	0	1	3	1	1	11	14
CTTGAGAGTCTTCTAT-1_1	0	0	0	2	2	2	2	6	7	8	8	7	7	7	8	8	8	8	8	10	10	10	8	8	9	10	9	10	10	6	10
CTTGAGAGTGGTCTAT-1_1	0	2	3	4	5	5	6	7	6	7	7	10	10	11	13	11	15	14	14	15	15	16	16	16	16	15	14	16	17	15	18
CTTGAGAGTTTCACTT-1_1	0	0	2	3	3	3	3	3	3	2	2	2	2	5	4	5	5	5	4	5	3	3	2	2	2	2	1	6	2	2	1
CTTGAGATCCGAGATT-1_1	0	0	0	0	4	4	5	5	5	6	6	6	6	6	7	7	7	7	7	6	5	5	5	5	6	5	6	4	5	5	5
CTTGAGATCTTGCAAG-1_1	0	0	0	0	0	0	0	0	0	0	0	0	0	0	7	7	0	4	0	6	1	0	10	5	1	0	0	0	5	5	13
CTTGATTAGCAACCAG-1_1	0	0	0	0	0	0	0	0	0	0	0	0	0	0	0	3	0	4	0	3	1	0	1	0	1	0	0	0	0	1	4
CTTGATTAGCTCACTA-1_1	0	2	3	4	5	5	6	7	6	7	7	10	10	11	13	11	15	14	14	15	15	16	16	16	16	15	14	16	17	15	18
CTTTCAAAGATAGTGT-1_1	0	0	0	0	0	0	0	0	0	0	0	0	0	0	6	2	6	1	6	1	4	6	6	7	3	6	5	5	3	3	6
CTTTCAAAGCAGTAAT-1_1	0	2	3	4	5	5	6	7	6	7	7	10	10	11	13	11	15	14	14	15	15	16	16	16	16	15	14	16	17	15	18
CTTTCAAAGGATACGC-1_1	0	0	2	3	3	3	3	3	3	2	2	2	2	5	4	5	5	5	4	5	3	3	2	2	2	2	1	9	2	2	1
CTTTCAACATTAGGAA-1_1	0	3	4	5	6	6	7	9	9	9	9	8	8	8	10	9	11	9	15	16	16	17	17	17	17	17	17	17	18	18	19
CTTTCGGAGCACCGAA-1_1	0	0	2	3	3	3	3	3	3	2	2	2	2	5	4	5	5	5	4	5	3	3	2	2	2	2	1	6	2	2	1
CTTTCGGGTCATTCCC-1_1	0	0	2	3	3	3	3	3	3	2	2	2	2	10	12	12	14	11	13	14	14	15	15	14	15	16	15	9	16	16	17
GAAACCTCACCAGGTC-1_1	0	0	2	3	3	3	3	3	3	2	2	2	2	5	4	5	5	5	4	5	3	3	2	2	2	2	1	9	2	2	1
GAAACCTGTTGCTAGT-1_1	0	4	5	6	9	9	10	12	12	12	12	13	13	15	16	16	18	17	19	20	20	21	21	21	21	21	21	21	22	22	23
GAAATGAGTAGGAAAG-1_1	0	0	0	2	2	2	2	2	2	1	1	1	1	12	9	13	10	13	10	11	12	11	11	12	11	11	10	12	11	10	11
GAACACTCACACTGGC-1_1	0	0	0	0	0	0	0	0	0	0	0	0	0	0	0	2	9	1	9	1	11	9	1	9	10	9	5	11	9	3	7
GAACGTTGTCCAGAAG-1_1	0	2	3	4	5	5	6	7	6	7	7	9	9	9	11	10	12	10	12	12	13	14	14	15	13	14	13	15	15	14	15
GAACGTTGTCTACAAC-1_1	0	0	0	0	0	0	0	0	0	0	0	1	0	0	6	2	6	1	6	1	4	6	6	11	3	6	5	5	3	3	6
GAACGTTGTGTCCATA-1_1	0	0	0	0	0	0	4	4	4	5	5	5	5	4	3	4	3	3	3	2	2	1	0	1	0	1	4	1	1	0	0
GAACTGTAGAAGCGAA-1_1	0	1	1	1	1	1	1	1	1	3	3	3	3	3	1	0	2	2	2	8	7	7	7	6	7	7	7	7	6	7	8
GAACTGTAGCTTAGTC-1_1	0	0	0	0	0	0	0	0	0	0	0	0	0	0	0	3	0	4	9	3	1	0	10	0	10	0	0	0	0	1	13
GAACTGTAGTTCTCTT-1_1	0	0	0	0	4	4	5	5	5	6	6	6	6	6	7	7	7	7	7	6	5	5	5	5	6	5	6	4	5	5	5
GAACTGTCAACTGTGT-1_1	0	0	0	0	0	0	0	0	0	0	0	0	0	0	0	3	0	4	0	3	1	0	10	0	1	0	0	0	0	1	13
GAAGAATAGTTGTAGA-1_1	0	0	0	0	0	0	0	0	0	0	0	0	0	0	6	2	6	1	6	1	4	6	6	7	3	6	5	5	3	3	6
GAAGAATCACCTTCGT-1_1	0	1	1	1	1	1	1	8	8	4	4	4	4	2	5	6	13	12	11	13	6	12	12	13	14	13	12	13	14	12	16
GAAGAATCACGCACCA-1_1	0	0	0	0	0	0	0	0	0	0	0	0	0	0	0	3	0	4	0	3	1	0	10	0	1	0	0	0	0	1	13
GAAGAATGTACACTCA-1_1	0	0	0	0	4	4	5	5	5	6	6	6	6	6	7	7	7	7	7	6	5	5	5	5	6	5	6	4	5	5	5
GAAGAATGTGGGCTCT-1_1	0	0	0	0	0	0	0	0	0	0	0	0	0	0	0	3	0	4	0	3	1	0	10	0	1	0	0	0	0	1	13
GAAGCCCCAGATACTC-1_1	0	0	0	0	0	0	0	0	0	0	0	0	0	0	0	3	0	4	0	3	1	0	1	0	1	0	0	0	0	1	4
GAAGCCCGTCAGGCAA-1_1	0	0	0	2	2	2	2	2	2	1	1	1	1	1	2	1	1	0	1	0	0	2	3	3	5	4	2	2	4	4	2
GAAGGACAGAGCAAGA-1_1	0	4	5	6	7	7	8	10	10	10	10	11	11	13	14	14	16	15	16	17	17	18	18	18	18	18	18	18	19	19	20
GAAGGACAGAGTACCG-1_1	0	1	1	1	1	1	1	1	1	4	4	4	4	2	1	0	4	6	5	4	9	4	4	4	4	3	3	3	12	11	14
GAAGGACAGCGTATAA-1_1	0	0	0	1	1	1	1	1	1	3	3	3	3	3	1	0	2	2	2	7	8	8	9	10	8	8	8	8	7	8	9
GAAGGACCACTCAAGT-1_1	0	0	0	0	4	4	5	5	5	6	6	6	6	6	7	7	7	7	7	6	5	5	5	5	6	5	6	4	5	5	5
GAAGGACCATCGCTAA-1_1	0	1	1	1	1	1	1	8	8	4	4	4	4	2	5	6	13	12	11	13	6	12	12	13	14	13	12	13	14	12	16
GAAGGACTCTAGAGCT-1_1	0	0	2	3	3	3	3	3	3	2	2	2	2	5	4	5	5	5	4	5	3	3	2	2	2	2	1	6	2	2	1
GAAGGGTAGCAGCACA-1_1	0	0	2	3	3	3	3	3	3	2	2	2	2	5	4	5	5	5	4	5	3	3	2	2	2	2	1	6	2	2	1
GAAGGGTAGTTGCCCG-1_1	0	0	0	0	0	0	0	0	0	0	0	0	0	0	0	2	0	1	0	1	4	0	1	9	3	0	0	0	3	3	7
GAAGGGTCAACTGTGT-1_1	0	0	0	2	2	2	2	5	2	1	1	1	1	6	7	7	7	7	7	6	5	5	5	5	6	12	6	4	13	5	12
GAAGGGTCACGCGGTT-1_1	0	1	1	1	1	1	1	1	1	4	4	4	4	2	1	0	4	6	5	4	9	4	4	4	4	3	3	3	12	11	14
GAAGGGTTCGTTCGCT-1_1	0	1	1	1	1	1	1	1	1	3	3	3	3	3	1	0	2	2	2	8	7	7	7	6	7	7	7	7	6	7	8
GAAGTAAAGATTTGCC-1_1	0	1	1	1	1	1	1	1	1	3	3	3	3	3	1	0	2	2	2	8	7	7	7	6	7	7	7	7	6	7	8
GAAGTAAAGTTGAATG-1_1	0	0	2	3	3	3	3	3	3	2	2	2	2	5	4	5	5	5	4	5	3	3	2	2	2	2	1	6	2	2	1
GAAGTAACACTTCTCG-1_1	0	2	3	4	5	5	6	7	6	7	7	10	10	11	13	11	15	14	14	15	15	16	16	16	16	15	14	16	17	15	18
GAATAGACATCAGCGC-1_1	0	2	3	4	5	5	6	7	6	7	7	10	10	11	13	11	15	14	14	15	15	16	16	16	16	15	14	16	17	15	18
GAATCACGTACCTAGT-1_1	0	0	0	2	2	2	2	2	2	1	1	1	1	1	2	1	1	0	1	0	0	2	3	3	5	4	2	2	4	4	2
GACACGCAGGGCATGT-1_1	0	0	0	0	4	4	5	5	5	6	6	6	6	6	7	7	7	7	7	6	5	5	5	5	6	5	6	4	5	5	5
GACACGCCAGTTAAAG-1_1	0	0	0	0	0	0	0	4	4	5	5	0	5	4	0	4	0	3	3	2	1	1	0	1	0	0	0	1	1	0	0
GACACGCCATGACGTT-1_1	0	0	0	0	0	0	0	0	0	0	0	0	0	0	0	2	9	1	9	1	4	9	10	9	3	9	5	11	3	3	7
GACACGCGTATTCCTT-1_1	0	0	0	2	2	2	2	2	2	1	1	1	1	1	2	1	1	0	1	0	0	2	3	3	5	4	2	2	4	4	2
GACACGCGTGCTGATT-1_1	0	0	0	0	0	0	0	0	4	0	5	0	5	0	0	3	0	4	0	3	1	0	0	0	1	0	0	0	0	1	0
GACAGCCCATTAGGCT-1_1	0	0	0	0	4	4	5	5	5	6	6	6	6	6	7	7	7	7	7	6	5	5	5	5	6	5	6	4	5	5	5
GACAGCCTCCGCGGAT-1_1	0	0	0	2	2	2	2	2	2	1	1	1	1	1	2	1	1	0	1	0	0	2	3	3	5	4	2	2	4	4	2
GACAGCCTCGTGTGAT-1_1	0	0	0	2	2	2	2	2	2	1	1	1	1	12	9	13	10	13	10	11	12	11	11	12	11	11	10	12	11	10	11
GACAGCCTCTGAATGC-1_1	0	0	0	0	0	0	0	0	0	0	0	0	0	0	0	3	0	4	0	3	1	0	1	0	1	0	0	0	0	1	4
GACATCAAGCTTTCTT-1_1	0	0	0	0	0	0	0	0	0	0	0	0	0	0	0	2	0	1	0	1	1	0	1	9	3	0	0	0	3	3	7
GACATCAAGGGCCTCT-1_1	0	0	0	2	2	2	2	6	7	8	8	7	7	7	8	8	8	8	8	10	10	10	8	8	9	10	9	10	10	6	10
GACATCAAGTAGTCTC-1_1	0	0	0	0	0	0	0	4	4	5	5	0	5	4	0	4	0	3	3	2	1	1	0	1	0	0	0	1	1	0	0
GACATCAGTAATGATG-1_1	0	2	3	4	5	5	6	7	6	7	7	9	9	9	11	10	12	10	12	12	13	14	14	15	13	14	13	15	15	14	15
GACATCAGTGGAACAC-1_1	0	0	0	0	0	0	0	0	0	0	0	0	0	0	6	2	6	1	6	1	4	6	6	7	3	6	5	5	3	3	6
GACCAATAGGGTAGCT-1_1	1	6	7	8	10	10	11	13	13	13	13	14	14	16	17	17	19	18	20	21	21	22	22	22	22	22	22	22	23	23	24
GACCAATCATTCTTCA-1_1	0	2	3	4	5	5	6	7	6	7	7	9	9	9	11	10	12	10	12	12	13	14	14	15	13	14	13	15	15	14	15
GACCAATGTATCGTTG-1_1	0	1	1	1	1	1	1	8	8	4	4	4	4	2	5	6	4	6	11	4	6	12	12	13	4	13	12	13	14	12	3
GACCAATGTTCGGACC-1_1	0	2	3	4	5	5	6	7	6	7	7	9	9	9	11	10	12	10	12	12	13	14	14	15	13	14	13	15	15	14	15
GACCAATTCTCAAAGC-1_1	1	6	7	8	10	10	11	13	13	13	13	14	14	16	17	17	19	18	20	21	21	22	22	22	22	22	22	22	23	23	24
GACCCAGAGTCACTCA-1_1	0	0	3	4	5	5	6	7	6	7	7	10	10	11	13	11	15	14	14	15	15	16	16	16	16	15	14	16	17	15	18
GACCCAGCACGTAACT-1_1	0	0	0	0	0	0	0	0	0	0	0	0	0	0	0	2	9	1	9	9	11	9	10	9	10	9	16	11	9	17	7
GACCCAGGTGCCCGTA-1_1	0	0	0	0	4	4	5	5	5	6	6	6	6	6	7	7	7	7	7	6	5	5	5	5	6	5	6	4	5	5	5
GACCCTTAGAAGCGGG-1_1	0	0	2	3	3	3	3	3	3	2	2	2	2	5	4	5	5	5	4	5	3	3	2	2	2	2	1	9	2	2	1
GACCCTTCAACACAAA-1_1	0	2	3	4	5	5	6	7	6	7	7	10	10	11	13	11	15	14	14	15	15	16	16	16	16	15	14	16	17	15	18
GACCCTTCAGGCCCTA-1_1	0	4	5	6	7	7	8	10	10	10	10	11	11	13	14	14	16	15	16	17	17	18	18	18	18	18	18	18	19	19	20
GACCCTTTCATCGACA-1_1	0	1	1	1	1	1	1	1	1	4	4	4	4	2	5	6	4	6	5	4	6	4	4	4	4	3	3	3	8	9	3
GACCCTTTCCGATCTC-1_1	0	0	0	2	2	2	2	2	2	1	1	1	1	1	9	1	10	0	10	7	12	11	11	12	11	11	10	12	11	10	11
GACCCTTTCCTCAGAA-1_1	0	1	1	1	1	1	1	1	1	4	4	4	4	2	5	6	4	6	5	4	6	4	4	4	4	3	3	3	8	9	3
GACCGTGAGGAGAATG-1_1	0	1	1	1	1	1	1	1	1	3	3	3	3	3	1	0	2	2	2	8	7	7	7	6	7	7	7	7	6	7	8
GACCGTGGTCCACATA-1_1	0	0	0	2	2	2	2	2	2	1	1	1	1	1	2	1	1	0	1	0	0	2	3	3	5	4	2	2	4	4	2
GACCTTCAGCCATTCA-1_1	0	1	1	1	1	1	1	8	8	4	4	4	4	2	5	6	13	12	11	13	6	12	12	13	14	13	12	13	14	12	16
GACCTTCGTAGTTAGA-1_1	0	1	1	1	1	1	1	1	1	4	4	4	4	2	5	6	4	6	5	4	6	4	4	4	4	3	3	3	8	9	3
GACGCTGGTACAGTCT-1_1	0	0	2	3	3	3	3	3	3	2	2	2	2	10	12	12	14	11	13	14	14	15	15	14	15	16	15	9	16	16	17
GACGCTGTCGCTGATA-1_1	0	0	0	0	4	4	5	5	5	6	6	6	6	6	7	7	7	7	7	6	5	5	5	5	6	5	6	4	5	5	5
GACGTTAAGTCCCGGT-1_1	0	0	0	2	2	2	2	2	2	1	1	1	1	1	2	1	1	0	1	0	0	2	3	3	5	4	2	2	4	4	2
GACGTTACAATAACCC-1_1	0	0	2	3	3	3	3	3	3	2	2	2	2	5	4	5	5	5	4	5	3	3	2	2	2	2	1	6	2	2	1
GACGTTAGTGTCATGT-1_1	0	0	0	0	4	4	5	5	5	6	6	6	6	6	7	7	7	7	7	6	5	5	5	5	6	5	6	4	5	5	5
GACGTTATCAGCAGAG-1_1	0	0	0	2	2	2	2	6	7	8	8	7	7	7	8	8	8	8	8	10	10	10	8	8	9	10	9	10	10	6	10
GACTATGCACGCGTGT-1_1	0	1	1	1	1	1	1	1	1	3	3	3	3	2	5	0	4	6	5	4	7	4	7	6	7	3	7	3	8	9	3
GACTATGCACTGCATA-1_1	0	0	0	0	0	0	0	0	0	0	0	1	0	0	6	2	6	1	6	1	4	6	6	11	3	6	5	5	3	3	6
GACTATGCAGAACCGA-1_1	0	1	1	1	1	1	1	1	1	4	4	4	4	2	1	0	4	6	5	4	9	4	4	4	4	3	3	3	12	11	3
GACTATGCATAGGTAA-1_1	0	2	3	4	5	5	6	7	6	7	7	9	9	9	11	10	12	10	12	12	13	14	14	15	13	14	13	15	15	14	15
GACTATGGTCTTCAAG-1_1	0	2	3	4	5	5	6	7	6	7	7	9	9	9	11	10	12	10	12	12	13	14	14	15	13	14	13	15	15	14	15
GACTATGTCGCTGTCT-1_1	0	0	0	0	4	4	5	5	5	6	6	6	6	6	7	7	7	7	7	6	5	5	5	5	6	5	6	4	5	5	5
GACTCAATCCGCGATG-1_1	0	2	3	4	5	5	6	7	6	7	7	9	9	9	11	10	12	10	12	12	13	14	14	15	13	14	13	15	15	14	15
GACTCTCCATGAAGGC-1_1	0	0	0	0	0	0	0	0	0	0	0	0	0	0	6	2	6	1	6	1	4	6	6	7	3	6	5	5	3	3	6
GACTGATAGATACAGT-1_1	0	0	0	0	4	4	5	5	5	6	6	6	6	6	7	7	7	7	7	6	5	5	5	5	6	5	6	4	5	5	5
GACTGATTCACCTCGT-1_1	0	0	0	0	0	0	0	0	0	0	0	0	0	0	6	2	6	1	6	1	4	6	6	7	3	6	5	5	3	3	6
GACTGATTCGTCCTCA-1_1	0	0	0	2	2	2	2	2	2	1	1	1	1	1	2	1	1	0	1	0	0	13	13	11	12	12	11	14	13	13	12
GACTTCCAGGAAGTAG-1_1	0	4	5	6	7	7	8	10	10	10	10	11	11	13	14	14	16	15	16	17	17	18	18	18	18	18	18	18	19	19	20
GAGAAATAGTCTTCGA-1_1	0	0	2	3	3	3	3	3	3	2	2	2	2	5	4	5	5	5	4	5	3	3	2	2	2	2	1	6	2	2	1
GAGAAATTCGGATACT-1_1	0	0	0	0	0	0	4	4	4	5	5	5	5	4	3	4	3	3	3	2	2	1	4	1	0	1	3	1	1	0	14
GAGAAATTCTAGAGCT-1_1	0	2	3	4	5	5	6	7	6	7	7	9	9	9	11	10	12	10	12	12	13	14	14	15	13	14	13	15	15	14	15
GAGAAATTCTTACCGC-1_1	0	0	0	0	0	0	0	0	0	0	0	0	0	0	0	2	0	1	0	1	4	0	1	9	3	0	0	0	3	3	7
GAGACTTAGTAGCAAT-1_1	0	0	0	0	0	0	0	0	0	0	0	0	0	0	0	3	0	4	0	3	1	0	1	0	1	0	0	0	0	1	4
GAGACTTGTAAGGAGA-1_1	0	4	5	6	7	7	8	10	10	10	10	11	11	13	14	14	16	15	16	17	17	18	18	18	18	18	18	18	19	19	20
GAGACTTTCCATCACC-1_1	0	4	5	6	7	7	8	10	10	10	10	11	11	13	14	14	16	15	16	17	17	18	18	18	18	18	18	18	19	19	20
GAGAGGTGTGGTTCTA-1_1	0	0	0	0	4	4	5	5	5	6	6	6	6	6	7	7	7	7	7	6	5	5	5	5	6	5	6	4	5	5	5
GAGATGGAGCCGGATA-1_1	0	1	1	1	1	1	1	1	1	3	3	3	3	2	5	0	4	6	5	4	7	4	7	6	7	3	7	3	8	9	3
GAGATGGAGCGCACAA-1_1	0	0	0	0	0	0	0	0	0	0	0	0	0	0	6	2	6	1	6	1	4	6	6	7	3	6	5	5	3	3	6
GAGATGGAGGATCATA-1_1	0	0	2	3	3	3	3	3	3	2	2	2	2	5	4	5	5	5	4	5	3	3	2	2	2	2	1	9	2	2	1
GAGATGGAGTTTGTCG-1_1	0	0	0	2	2	2	2	2	2	1	1	1	1	1	2	1	1	0	1	0	0	2	3	3	5	4	2	2	4	4	2
GAGATGGCACTAACCA-1_1	0	1	1	1	1	1	1	8	8	4	4	4	4	2	5	6	13	12	11	13	6	12	12	13	14	13	12	13	14	12	16
GAGATGGGTCGAATTC-1_1	0	0	0	2	2	2	2	2	2	1	1	1	1	1	2	1	1	0	1	0	0	2	3	3	5	4	2	2	4	4	2
GAGATGGGTGACTGAG-1_1	0	0	0	2	2	2	2	6	7	8	8	7	7	7	8	8	8	8	8	10	10	10	8	8	9	10	9	10	10	6	10
GAGCCTGCAGACCGCT-1_1	0	2	3	4	5	5	6	7	6	7	7	9	9	9	11	10	12	10	12	12	13	14	14	15	13	14	13	15	15	14	15
GAGCCTGGTATGCGTT-1_1	0	0	2	3	3	3	3	3	3	2	2	2	2	5	4	5	5	5	4	5	3	3	2	2	2	2	1	6	2	2	1
GAGCCTGGTTGCGGAA-1_1	0	0	0	0	0	0	0	0	0	0	0	0	0	0	6	2	6	1	6	1	4	6	6	7	3	6	5	5	3	3	6
GAGCTGCAGAGTTGAT-1_1	0	0	0	0	0	0	0	0	0	0	0	0	0	0	0	2	0	1	0	1	4	0	1	9	3	9	5	0	3	3	7
GAGCTGCAGGGCCTCT-1_1	0	0	0	0	0	0	4	4	2	5	1	5	5	4	9	1	3	3	10	7	2	11	11	1	11	11	10	12	11	10	9
GAGCTGCCAATTAGGA-1_1	0	3	4	5	6	6	7	9	9	9	9	8	8	8	10	9	11	9	15	16	16	17	17	17	17	17	17	17	18	18	19
GAGCTGCGTCTTACTT-1_1	0	1	1	1	1	1	1	1	1	4	4	4	4	2	1	0	4	6	5	4	9	4	4	4	4	3	3	3	12	11	14
GAGCTGCTCTATCGTT-1_1	0	0	2	3	3	3	3	3	3	2	2	2	2	5	4	5	5	5	4	5	3	3	2	2	2	2	1	6	2	2	1
GAGGCAAAGAGGACTC-1_1	0	0	0	0	0	0	0	0	0	0	0	0	0	0	6	2	6	1	6	1	4	6	6	11	3	6	5	5	3	3	6
GAGGCAAAGGTCGACA-1_1	0	2	3	4	5	5	6	7	6	7	7	10	10	11	13	11	15	14	14	15	15	16	16	16	16	15	14	16	17	15	18
GAGGCAACATGATCTG-1_1	0	0	0	0	2	2	0	6	0	8	0	7	7	7	8	8	9	8	8	9	10	9	8	8	9	10	9	10	9	6	7
GAGGCAATCAGGAGAC-1_1	0	1	1	1	1	1	1	1	1	4	4	4	4	2	1	0	4	6	5	4	9	4	4	4	4	3	3	3	12	11	14
GAGGCAATCTCCCTAG-1_1	0	0	0	2	2	2	2	2	2	1	1	1	1	1	2	1	1	0	1	0	0	2	3	3	5	4	2	2	4	4	2
GAGGCCTCAAATGCTC-1_1	0	0	2	3	3	3	3	3	3	2	2	2	2	5	4	5	5	5	4	5	3	3	2	2	2	2	1	6	2	2	1
GAGGCCTCACATGTTG-1_1	0	0	0	0	0	0	0	0	0	0	0	0	0	0	6	2	6	1	6	1	4	6	6	7	3	6	5	5	3	3	6
GAGGCCTCAGTATTCG-1_1	0	0	2	3	3	3	3	3	3	2	2	2	2	5	4	5	5	5	4	5	3	3	2	2	2	2	1	6	2	2	1
GAGGCCTGTGCGTGCT-1_1	0	0	0	0	0	0	0	0	0	0	0	0	0	0	6	2	6	1	6	1	4	6	6	7	3	6	5	5	3	3	6
GAGGCCTTCCCTCAAC-1_1	0	0	0	0	0	0	4	4	4	5	5	5	5	4	3	4	3	3	3	2	2	1	4	1	0	1	3	1	1	0	14
GAGGGATAGTTGGCGA-1_1	0	0	2	3	3	3	3	3	3	2	2	2	2	5	4	5	5	5	4	5	3	3	2	2	2	2	1	6	2	2	1
GAGGGATCAGCAGTGA-1_1	0	0	0	2	2	2	2	6	7	8	8	7	7	7	8	8	8	8	8	10	10	10	8	8	9	10	9	10	10	6	10
GAGGGATTCTTAGGAC-1_1	0	0	0	0	0	0	0	4	4	5	5	0	5	4	0	4	3	3	3	2	1	1	10	1	0	11	16	1	1	0	11
GAGGGTAGTCAATCTG-1_1	0	0	0	2	2	2	2	2	2	1	1	1	1	1	2	1	1	0	1	1	0	2	13	11	12	12	11	14	13	13	12
GAGGGTATCCTGGCTT-1_1	0	0	0	2	2	2	2	6	7	8	8	7	7	7	8	8	8	8	8	10	10	10	8	8	9	10	9	10	10	6	10
GAGTCATAGAAGGTAG-1_1	0	0	0	0	0	0	4	4	4	5	5	5	5	4	3	4	3	3	3	2	2	1	4	1	0	1	3	1	1	0	14
GAGTCATAGTGTTCCA-1_1	0	0	0	0	0	0	0	0	0	0	0	0	0	0	0	2	9	1	9	9	11	9	10	9	10	9	16	11	9	17	7
GAGTCATCAATCCTAG-1_1	0	1	1	1	1	1	1	1	1	4	4	4	4	2	5	6	4	6	5	4	6	4	4	4	4	3	3	3	8	9	3
GAGTCATTCGACGCGT-1_1	0	0	0	0	0	0	0	0	0	0	0	0	0	0	0	3	0	4	0	3	1	0	10	0	1	0	0	0	0	1	13
GAGTCATTCTAGACCA-1_1	0	0	0	0	0	0	0	0	0	0	0	0	0	0	6	2	6	1	6	1	4	6	6	11	3	6	5	5	3	3	6
GAGTCATTCTGTAAGC-1_1	0	0	0	2	2	2	2	6	7	8	3	3	7	7	8	8	8	8	2	7	8	10	8	8	9	10	8	10	10	6	10
GAGTCTAAGCCAAGCA-1_1	0	0	0	0	0	0	0	0	0	0	0	0	0	0	6	2	6	1	6	1	4	6	6	7	3	6	5	5	3	3	6
GAGTCTACATGAAGCG-1_1	0	0	0	0	0	0	0	0	0	0	0	0	0	0	0	3	0	4	0	3	1	0	1	0	1	0	0	0	0	1	4
GAGTCTACATGGACAG-1_1	0	1	5	1	1	7	8	10	10	10	10	11	11	13	14	14	16	15	16	17	17	18	18	18	18	18	18	18	19	24	25
GAGTGAGAGTTTCGGT-1_1	0	0	0	2	2	2	2	2	2	1	1	1	1	1	2	1	1	1	1	1	4	2	1	9	3	9	5	0	3	3	7
GAGTGAGGTGGCTCTG-1_1	0	4	5	6	9	9	10	12	12	12	12	13	13	15	16	16	18	17	19	20	20	21	21	21	21	21	21	21	22	22	23
GAGTGAGTCCACCTGT-1_1	0	0	0	0	0	0	0	0	0	0	0	0	0	0	6	2	6	1	6	1	4	6	6	7	3	6	5	5	3	3	6
GAGTGAGTCTCGTGGG-1_1	0	0	0	2	2	2	2	6	7	8	8	7	7	7	8	8	8	8	8	10	10	10	8	8	9	10	9	10	10	6	10
GAGTGTTGTCACTAGT-1_1	0	1	1	1	1	1	1	1	1	3	3	3	3	3	1	0	2	2	2	8	7	7	7	6	7	7	7	7	6	7	8
GAGTGTTTCTCCGATC-1_1	0	0	0	0	4	4	5	5	5	6	6	6	6	6	7	7	7	7	7	6	5	5	5	5	6	5	6	4	5	5	5
GAGTTACAGGACATCG-1_1	0	0	0	0	0	0	4	4	4	5	5	5	5	4	3	4	3	3	3	2	2	1	0	1	0	1	4	1	1	0	0
GAGTTACCAACGCCCA-1_1	0	1	1	1	1	1	1	1	1	4	4	4	4	2	5	6	4	6	5	4	6	4	4	4	4	3	3	3	8	9	3
GAGTTACGTTGGGACA-1_1	0	1	1	1	1	1	1	1	1	3	3	3	3	2	5	0	4	6	5	4	7	4	7	6	7	3	7	3	8	9	3
GAGTTGTGTAATTAGG-1_1	0	0	0	2	2	2	2	2	2	1	1	1	1	12	9	13	10	13	10	11	12	11	11	12	11	11	10	12	11	10	11
GAGTTGTTCACATTGG-1_1	0	0	0	2	2	2	2	6	7	8	8	7	7	7	8	8	8	8	8	10	10	10	8	8	9	10	9	10	10	6	10
GAGTTGTTCCACCTCA-1_1	0	0	2	3	3	3	3	3	3	2	2	2	2	5	4	5	5	5	4	5	3	3	2	2	2	2	1	6	2	2	1
GAGTTTGCAGACACAG-1_1	0	0	2	3	3	3	3	3	3	2	2	2	2	5	4	5	5	5	4	5	3	3	2	2	2	2	1	6	2	2	1
GAGTTTGCAGCCTACG-1_1	0	0	0	2	2	2	2	2	2	1	1	1	1	1	2	1	1	0	1	0	0	13	13	11	12	12	11	14	13	13	12
GAGTTTGCATGTTACG-1_1	0	0	0	0	0	0	0	0	0	0	0	0	0	0	6	2	6	1	6	1	4	6	6	7	3	6	5	5	3	3	6
GATAGAAGTTTGACAC-1_1	0	0	0	2	2	2	2	6	7	8	8	7	7	7	8	8	8	8	8	10	10	10	8	8	9	10	9	10	10	6	10
GATAGCTTCAGCTAGT-1_1	0	1	1	1	1	1	1	8	8	4	4	4	4	2	5	6	4	6	11	4	6	4	4	13	4	3	3	13	8	9	3
GATCACACAATTGCGT-1_1	0	1	1	1	1	1	1	1	1	4	4	4	4	2	5	6	4	6	5	4	6	4	4	4	4	3	3	3	8	9	3
GATCACACAGAAATCA-1_1	0	0	2	3	3	3	3	3	3	2	2	2	2	5	4	5	5	5	4	5	3	3	2	2	2	2	1	6	2	2	1
GATCACAGTTTACGAC-1_1	0	0	0	0	0	0	4	4	4	5	5	5	5	4	3	4	3	3	3	2	2	1	0	1	0	1	4	1	1	0	0
GATCACATCACCTTGC-1_1	0	0	0	2	2	2	2	2	2	1	1	1	1	1	2	1	1	0	1	0	0	2	3	3	5	4	2	2	4	4	2
GATCATGAGCGCTGCT-1_1	0	0	0	2	2	2	2	2	2	1	1	1	1	1	2	1	1	0	1	0	0	13	13	11	12	12	11	14	13	13	12
GATCATGAGTACGAGC-1_1	0	0	0	2	2	2	2	6	7	8	8	7	7	7	8	8	8	8	8	10	10	10	8	8	9	10	9	10	10	6	10
GATCATGTCGCAACAT-1_1	0	0	2	3	3	3	3	3	3	2	2	2	2	5	6	5	6	5	6	1	4	6	6	14	2	6	1	9	2	2	6
GATCCCTAGCATCTTG-1_1	0	2	3	4	5	5	6	7	6	7	7	9	9	9	11	10	12	10	12	12	13	14	14	15	13	14	13	15	15	14	15
GATCCCTAGGTATAGT-1_1	0	0	0	0	0	0	4	4	4	5	5	5	5	4	3	4	3	3	3	2	2	1	0	1	0	1	4	1	1	0	0
GATCCCTCAGACTCTA-1_1	0	0	2	3	3	3	3	3	3	2	2	2	2	5	4	5	5	5	4	5	3	3	2	2	2	2	1	6	2	2	1
GATCCCTTCCCTGGTT-1_1	0	0	0	0	0	0	4	4	4	5	5	5	5	4	3	4	3	3	3	2	2	1	0	1	0	1	4	1	1	0	0
GATCGTAGTACTCCCT-1_1	0	0	0	0	0	0	4	4	4	5	5	5	5	4	3	4	3	3	3	2	2	1	0	1	0	1	4	1	1	0	0
GATGACTCAGCTACTA-1_1	0	0	0	2	2	2	2	2	2	1	1	1	1	1	2	1	1	0	1	0	0	2	3	3	5	4	2	2	4	4	12
GATGACTTCCAGTTCC-1_1	0	1	1	1	1	1	1	1	1	3	3	3	3	3	1	0	2	2	2	8	7	7	7	6	7	7	7	7	6	7	8
GATGAGGAGCGACTGA-1_1	0	0	0	2	2	2	2	2	2	1	1	1	1	1	2	1	1	0	1	0	0	2	3	3	5	4	2	2	4	4	2
GATGAGGAGTAGAATC-1_1	0	0	2	3	3	3	3	3	3	2	2	2	2	5	4	5	5	5	4	5	3	3	2	2	2	2	1	6	2	2	1
GATGAGGGTTGGCCGT-1_1	0	0	0	0	4	4	5	5	5	6	6	6	6	6	7	7	7	7	7	6	5	5	5	5	6	5	6	4	5	5	5
GATGATCAGCTTACGT-1_1	0	0	0	2	2	2	2	6	7	8	8	7	7	7	8	8	8	8	8	10	10	10	8	8	9	10	9	10	10	6	10
GATGATCAGTACAGAT-1_1	0	0	0	0	0	0	0	0	0	0	0	1	0	0	6	2	6	1	6	1	4	6	6	11	3	6	5	5	3	3	6
GATGATCCATGTGACT-1_1	0	1	1	1	1	1	1	1	1	3	3	3	3	3	1	0	2	2	2	8	7	7	7	6	7	7	7	7	6	7	8
GATGATCGTACTCAAC-1_1	0	2	3	4	5	5	6	7	6	7	7	9	9	9	11	10	12	10	12	12	13	14	14	15	13	14	13	15	15	14	15
GATGATCTCCGCAACG-1_1	0	0	0	0	0	0	4	4	4	5	5	5	5	4	3	4	3	3	3	2	2	1	0	1	0	1	4	1	1	0	0
GATGCTAAGGCCGCTT-1_1	0	1	1	1	1	1	1	1	1	3	3	3	3	3	1	0	2	2	2	8	7	7	7	6	7	7	7	7	6	7	8
GATGCTAGTACGTACT-1_1	0	4	5	6	9	9	10	12	12	12	12	13	13	15	16	16	18	17	19	20	20	21	21	21	21	21	21	21	22	22	23
GATGCTAGTGTCGCTG-1_1	0	0	0	0	0	0	0	0	0	0	0	0	0	0	0	2	0	1	0	1	4	8	9	10	3	8	5	8	7	3	9
GATGCTAGTTGTTGAC-1_1	0	0	0	1	0	0	0	0	0	3	3	3	3	1	1	1	2	2	2	7	8	8	9	10	8	8	8	8	7	8	9
GATGCTATCATCGCCT-1_1	0	0	0	0	4	4	5	5	5	6	6	6	6	6	7	7	7	7	7	6	5	5	5	5	6	5	6	4	5	5	5
GATGCTATCCCTCATG-1_1	0	0	0	0	0	0	0	0	0	0	0	1	0	0	6	2	6	1	6	1	4	6	6	11	3	6	5	5	3	3	6
GATGGAGAGTCATGCT-1_1	0	2	3	4	5	5	6	7	6	7	7	9	9	9	11	10	12	10	12	12	13	14	14	15	13	14	13	15	15	14	15
GATGGAGGTAGTCTTG-1_1	0	0	0	2	2	2	2	6	7	8	8	7	7	7	8	8	8	8	8	10	10	10	8	8	9	10	9	10	10	6	10
GATGGAGGTCCACTTC-1_1	0	2	3	4	5	5	6	7	6	7	7	9	9	9	11	10	12	10	12	12	13	14	14	15	13	14	13	15	15	14	15
GATGGAGGTCTACACA-1_1	0	0	0	0	0	0	0	0	0	0	0	0	0	0	0	2	9	1	9	9	11	9	10	9	10	9	16	11	9	17	7
GATGGAGGTGAATAAC-1_1	0	0	2	3	3	3	3	3	3	2	2	2	2	5	4	5	5	5	4	5	3	3	2	2	2	2	1	9	2	2	1
GATGGAGGTTGCTCGG-1_1	0	1	1	1	1	1	1	1	1	3	3	3	3	3	1	0	2	2	2	8	7	7	7	6	7	7	7	7	6	7	8
GATGGAGTCCAGTGTA-1_1	0	0	0	0	0	0	4	4	4	5	5	5	5	4	3	4	3	3	3	2	2	1	0	1	0	1	4	1	1	0	0
GATGGAGTCCCTTGGT-1_1	0	0	0	2	2	2	2	6	7	8	8	7	7	7	8	8	8	8	8	10	10	10	8	8	9	10	9	10	10	6	10
GATGGAGTCGAACCAT-1_1	0	0	0	2	2	2	2	2	2	1	1	1	1	1	2	1	1	0	1	0	0	2	3	3	5	4	2	2	4	4	2
GATGGAGTCTGTAAGC-1_1	0	1	1	1	1	1	1	8	8	4	4	4	4	2	5	6	4	6	11	4	6	4	4	13	4	3	3	13	8	9	3
GATGTTGAGTGATCGG-1_1	0	0	0	2	2	2	2	2	2	1	1	1	1	12	9	13	10	13	10	11	12	11	11	12	11	11	10	12	11	10	11
GATGTTGCAGGAGGAG-1_1	0	1	1	1	1	1	1	1	1	4	4	4	4	2	5	6	4	6	5	4	9	4	4	4	4	3	3	3	8	9	3
GATGTTGGTATTGCCA-1_1	0	0	0	0	4	4	5	5	5	6	6	6	6	6	7	7	7	7	7	6	5	5	5	5	6	5	6	4	5	5	5
GATGTTGTCGGACGTC-1_1	0	1	1	1	1	1	1	1	1	3	3	3	3	2	1	0	4	6	5	4	7	4	7	6	7	3	7	3	8	9	3
GATTCGACAACACACT-1_1	0	0	0	0	0	0	4	4	4	5	5	5	5	4	3	4	3	3	3	2	2	1	0	1	0	1	4	1	1	0	0
GATTCGACACTGGCCA-1_1	0	0	0	2	2	2	2	2	2	1	1	1	1	1	2	1	1	0	1	0	0	2	3	3	5	4	2	2	4	4	2
GATTCGACATCAGCAT-1_1	0	0	0	0	0	0	4	4	4	5	5	5	5	4	3	4	3	3	3	2	2	1	0	1	0	1	4	1	1	0	0
GATTCGAGTCGCACGT-1_1	0	2	3	4	5	5	6	7	6	7	7	9	9	9	11	10	12	10	12	12	13	14	14	15	13	14	13	15	15	14	15
GATTCGAGTTTGTTGG-1_1	0	0	2	3	3	3	3	3	3	2	2	2	2	5	4	5	5	5	4	5	3	3	2	2	2	2	1	6	2	2	1
GATTCGATCCAGCACG-1_1	0	0	0	0	0	0	4	4	4	5	5	5	5	4	3	4	3	3	3	2	2	1	0	1	0	1	4	1	1	0	0
GATTCGATCCGAGGCT-1_1	0	0	0	2	2	2	2	2	2	1	1	1	1	12	9	13	10	13	10	11	12	11	11	12	11	11	10	12	11	10	11
GATTCTTAGATTAGCA-1_1	0	0	0	0	0	0	4	4	4	5	5	5	5	4	3	4	3	3	3	2	2	1	0	1	0	1	4	1	1	0	0
GATTCTTGTAGAGTTA-1_1	0	0	0	0	0	0	0	0	0	0	0	0	0	0	6	2	6	1	6	1	4	6	6	7	3	6	5	5	3	3	6
GATTCTTGTGTCATTG-1_1	0	0	0	2	2	2	2	2	2	1	1	1	1	1	2	1	1	0	1	0	0	2	3	3	5	4	2	2	4	4	2
GATTCTTGTTTAGAGA-1_1	0	0	0	2	2	2	2	2	2	1	1	1	1	1	2	1	1	0	1	1	0	13	13	11	12	12	11	14	13	13	12
GATTGGTAGCGCCTCA-1_1	0	0	0	0	0	0	0	0	0	0	0	0	0	0	0	3	0	4	0	3	1	0	1	0	1	0	0	0	0	1	4
GATTGGTAGTAGAGTT-1_1	0	0	0	0	0	0	0	0	0	0	0	0	0	0	0	3	0	4	0	3	1	0	1	0	1	0	0	0	0	1	4
GATTGGTCACGGATCC-1_1	0	0	0	0	0	0	0	0	0	0	0	0	0	0	0	3	0	4	0	3	1	0	1	0	1	0	0	0	0	1	4
GATTGGTCATACCAGT-1_1	0	0	0	2	2	2	2	6	7	8	8	7	7	7	8	8	8	8	8	10	10	10	8	8	9	10	9	10	10	6	10
GATTGGTTCAGACCGC-1_1	0	0	0	0	0	0	0	0	0	0	0	0	0	0	0	3	0	4	0	3	1	0	1	0	1	0	0	0	0	1	4
GATTGGTTCCTCATAT-1_1	0	3	4	5	6	6	7	9	9	9	9	8	8	8	10	9	11	9	15	16	16	17	17	17	17	17	17	17	18	18	19
GATTTCTAGAAAGCGA-1_1	0	0	0	2	2	2	2	6	7	8	8	7	7	7	8	8	8	8	8	10	10	10	8	8	9	10	9	10	10	6	10
GATTTCTAGCGATCGA-1_1	0	0	0	2	2	2	2	6	7	8	8	7	7	7	8	8	8	8	8	10	10	10	8	8	9	10	9	10	10	6	10
GATTTCTGTTTACCAG-1_1	0	0	0	2	2	2	2	2	2	1	1	1	1	1	2	1	1	0	1	0	0	2	3	3	5	4	2	2	4	4	2
GATTTCTTCCATCAGA-1_1	0	0	0	0	0	0	0	0	0	0	0	0	0	0	6	2	6	1	6	1	4	6	6	7	3	6	5	5	3	3	6
GCAACATCATGATCTG-1_1	0	1	1	1	1	1	1	1	1	4	4	4	4	2	1	0	4	6	5	4	9	4	4	4	4	3	3	3	12	11	14
GCAACATGTGAGGATC-1_1	0	0	0	0	4	4	5	5	5	6	6	6	6	6	7	7	7	7	7	6	5	5	5	5	6	5	6	4	5	5	5
GCAACCGAGTTCCATG-1_1	0	1	1	1	1	1	1	1	1	4	4	4	4	2	5	6	4	6	5	4	9	4	4	4	4	3	3	3	8	9	3
GCACATAAGCTCGCAC-1_1	0	0	0	0	4	4	5	5	5	6	6	6	6	6	7	7	7	7	7	6	5	5	5	5	6	5	6	4	5	5	5
GCACATACAATCTCGA-1_1	0	0	0	1	1	1	1	1	1	3	3	3	3	3	1	0	2	2	2	7	8	8	9	6	8	8	8	8	7	8	14
GCACATACAATTGCAC-1_1	0	0	2	3	3	3	3	3	3	2	2	2	2	5	4	5	5	5	4	5	3	3	2	2	2	2	1	6	2	2	1
GCACATACACATTCGA-1_1	0	0	0	0	0	0	4	4	4	5	5	5	5	4	3	4	3	3	3	2	2	1	0	1	0	1	4	1	1	0	0
GCACATAGTATTTCCT-1_1	0	0	0	0	2	2	2	6	7	8	8	7	7	7	8	8	8	8	8	9	10	9	8	8	9	10	9	10	9	6	10
GCACGGTCACTGGCGT-1_1	0	0	0	0	4	4	5	5	5	6	6	6	6	6	7	7	7	7	7	6	5	5	5	5	6	5	6	4	5	5	5
GCACGGTGTTTAAGGA-1_1	0	0	0	0	0	0	0	0	0	0	0	0	0	0	0	2	0	1	0	1	4	0	1	9	3	0	5	0	0	3	4
GCACGTGAGTACCGGA-1_1	0	0	0	2	2	2	2	2	2	1	1	1	1	1	2	1	1	0	1	0	0	13	13	11	12	12	11	14	13	13	12
GCACGTGAGTACGAGC-1_1	0	2	3	4	5	5	6	7	6	7	7	9	9	9	11	10	12	10	12	12	13	14	14	15	13	14	13	15	15	14	15
GCACTAAAGCCTCACG-1_1	0	1	1	1	1	1	1	1	1	3	3	3	3	3	1	0	2	2	2	8	7	7	7	6	7	7	7	7	6	7	8
GCACTAACATATGAAG-1_1	0	0	2	3	3	3	3	3	3	2	2	2	2	5	4	5	5	5	4	5	3	3	2	2	2	2	1	9	2	2	1
GCACTAACATCATCTT-1_1	0	5	6	7	8	8	9	11	11	11	11	12	12	14	15	15	17	16	18	19	19	20	20	20	20	20	20	20	21	21	22
GCACTAACATTGTCGA-1_1	0	0	0	0	0	0	4	4	4	5	5	5	5	4	3	4	3	3	3	2	2	1	0	1	0	1	4	1	1	0	0
GCACTAATCTAAACGC-1_1	0	0	0	2	2	2	2	2	2	1	1	1	1	1	2	1	1	0	1	0	0	2	3	3	5	4	2	2	4	4	2
GCAGCCAGTGGTAACG-1_1	0	2	3	4	5	5	6	7	6	7	7	10	10	11	13	11	15	14	14	15	15	16	16	16	16	15	14	16	17	15	18
GCAGCCAGTTCTGAGT-1_1	0	2	3	4	5	5	6	7	6	7	7	9	9	9	11	10	12	10	12	12	13	14	14	15	13	14	13	15	15	14	15
GCAGCCATCACACCGG-1_1	0	1	1	1	1	1	1	1	1	4	4	4	4	2	5	6	4	6	5	4	6	4	4	4	4	3	3	3	8	9	3
GCAGCCATCGGCTGAC-1_1	0	2	3	4	5	5	6	7	6	7	7	10	10	11	13	11	15	14	14	15	15	16	16	16	16	15	14	16	17	15	18
GCAGCTGAGGTAGCCA-1_1	0	0	2	3	3	3	3	3	3	2	2	2	2	5	4	5	5	5	4	5	3	13	13	11	12	12	11	14	13	13	12
GCAGCTGCAGAGCGTA-1_1	0	0	0	0	0	0	0	0	0	0	0	0	0	0	6	2	6	1	6	1	4	6	6	7	3	6	5	5	3	3	6
GCAGCTGGTAAGTTGA-1_1	0	0	0	0	0	0	4	4	4	5	5	5	5	4	3	4	3	3	3	2	2	1	0	1	0	1	4	1	1	0	0
GCAGCTGGTGTAGTGG-1_1	0	0	0	0	4	4	5	5	5	6	6	6	6	6	7	7	7	7	7	6	5	5	5	5	6	5	6	4	5	5	5
GCAGGCTAGCACTAGG-1_1	0	1	1	1	1	1	1	1	1	4	4	4	4	2	1	0	4	6	5	4	9	4	4	4	4	3	3	3	12	11	14
GCAGGCTGTGTGACCC-1_1	0	0	0	0	0	0	0	0	0	0	0	0	0	0	6	2	6	1	6	1	4	6	6	7	3	6	5	5	3	3	6
GCAGGCTTCATCCTAT-1_1	0	0	0	0	0	0	4	4	4	5	5	5	5	4	3	4	3	3	3	2	2	1	0	1	0	1	4	1	1	0	0
GCAGTTAAGAGGGTAA-1_1	0	0	2	3	3	3	3	3	3	2	2	2	2	5	4	5	5	5	4	5	3	3	2	2	2	2	1	6	2	2	1
GCAGTTACACTGTGTA-1_1	0	1	1	1	1	1	1	1	1	3	3	3	3	3	1	0	2	2	2	8	7	7	7	6	7	7	7	7	6	7	8
GCAGTTAGTCCGCAGT-1_1	0	0	0	0	0	0	0	0	0	0	0	0	0	0	0	3	0	4	0	3	1	0	1	9	1	0	0	0	0	1	4
GCAGTTAGTTCCACAA-1_1	0	4	5	6	9	9	10	12	12	12	12	13	13	15	16	16	18	17	19	20	20	21	21	21	21	21	21	21	22	22	23
GCAGTTATCTTAGCTT-1_1	0	0	0	2	2	2	2	2	2	1	1	1	1	12	9	13	10	13	10	11	12	11	11	12	11	11	10	12	11	10	11
GCATCGGGTGTAGCAG-1_1	0	0	0	0	0	0	4	4	4	5	5	5	5	4	3	4	3	3	3	2	2	1	0	1	0	1	4	1	1	0	0
GCATCGGGTTTCAGAC-1_1	0	0	0	0	0	0	0	0	0	0	0	0	0	0	6	2	6	1	6	1	4	6	6	7	3	6	5	5	3	3	6
GCATCTCAGCATGGGT-1_1	0	0	0	0	0	0	0	0	0	0	0	0	0	0	6	2	6	1	6	1	4	6	6	7	3	6	5	5	3	3	6
GCATCTCAGGAAGTCC-1_1	0	2	3	4	5	5	6	7	6	7	7	10	10	11	13	11	15	14	14	15	15	16	16	16	16	15	14	16	17	15	18
GCATCTCAGTGCACCC-1_1	0	1	1	1	1	1	1	1	1	3	3	3	3	3	1	0	2	2	2	8	7	7	7	6	7	7	7	7	6	7	8
GCATCTCCATCTCGTC-1_1	0	0	0	0	0	0	4	4	4	5	5	5	5	4	3	4	3	3	3	2	2	1	4	1	0	1	3	1	12	11	14
GCATCTCCATTGCAAC-1_1	0	0	0	0	0	0	0	0	0	0	0	0	0	0	0	3	0	4	0	3	1	0	1	0	1	0	0	0	0	1	4
GCATCTCGTCGCCTAG-1_1	0	0	0	0	4	4	5	5	5	6	6	6	6	6	7	7	7	7	7	6	5	5	5	5	6	5	6	4	5	5	5
[truncated: 10,897 more rows]

## Sheet: 3-CUS by resolution value
	orig.ident	treatment	time	nCount_RNA	nFeature_RNA	percent.mt	percent.ribo	percent.chrY	S.Score_integrated	G2M.Score_integrated	Phase_integrated	res_0.2_Clustering	res_0.2_Uncertainty	UMAP_1	UMAP_2
[truncated: 12,621 more rows]
